# Supplementary material for: Genome-wide pooled CRISPR screening in neurospheres
Source: Springer Nature journal article supplement (doi:10.1038/s41596-023-00835-6), 2023-06-07
Supplement: MOESM2 [file 41596_2023_835_MOESM2_ESM13.xlsx]

## Sheet: Guide_Level_Read_Counts
Construct Barcode	Brie all-in-one_ReplicateA	Brie all-in-one_ReplicateB	Brie all-in-one_ReplicateC	Brie all-in-one_Average_of_all_replicates
AAAAAAAAAAAATGCATTCT	92	20	68	60
AAAAAAAAATAAGCTCACCC	55	433	528	338.667
AAAAAAAATCCTGTCGCCCA	308	332	1066	568.667
AAAAAAATCGGCATACCATG	375	455	612	480.667
AAAAAAATGACATTACTGCA	18	21	66	35
AAAAAACAACCTATACGAAG	97	9	39	48.3333
AAAAAACAGCAAGAAGTGGT	188	280	161	209.667
AAAAAACAGTGGATATCAGA	41	26	137	68
AAAAAACCCCCTTAAAGAGT	25	86	150	87
AAAAAACGGAATGAGTCTGC	155	130	104	129.667
AAAAAACGTATGGCACGAAG	47	303	44	131.333
AAAAAACTCACAAAAAAGAA	2	4	39	15
AAAAAAGTAGCAAGAGCTTT	314	278	671	421
AAAAAAGTATATCATACCCC	164	211	549	308
AAAAAAGTCCCACAAACAAA	209	86	14	103
AAAAAAGTGGAAGACTTCAC	378	574	186	379.333
AAAAAAGTTATTAGCCATGG	384	102	611	365.667
AAAAAATACTCTTCCGTCGA	26	113	379	172.667
AAAAAATGATTAATGACCCG	304	335	258	299
AAAAAATGCTTCCACAACTT	436	1193	284	637.667
AAAAAATGGCTTCTGGACCG	462	2723	296	1160.33
AAAAAATGGTGGAATCCATC	748	365	545	552.667
AAAAAATTATGGCCCACGAG	162	401	185	249.333
AAAAACAACAGGGAAGGCCG	181	24	95	100
AAAAACACCCTATCAATACA	6	163	171	113.333
AAAAACAGAACACCGAACAT	5	8	354	122.333
AAAAACAGCGAATAGAAACA	346	261	126	244.333
AAAAACAGGATCTCTATATG	237	247	24	169.333
AAAAACAGTTGGCTTACGTG	288	222	974	494.667
AAAAACATGGGCAAATCGTA	145	196	513	284.667
AAAAACCAACCTCAAGCATG	474	1079	1055	869.333
AAAAACCACTCGTCTGTAGA	260	550	126	312
AAAAACCCACCGGACATAGT	1901	292	2721	1638
AAAAACCCACCTGTGGCACA	294	248	339	293.667
AAAAACCGGCTTCAACTCCG	52	564	675	430.333
AAAAACGCAGTACCTCCTGG	707	172	282	387
AAAAACGTAGATGGGCGTGG	309	144	582	345
AAAAACTAAGCTGTTCCCAA	24	23	93	46.6667
AAAAACTATCAGGACTAAGA	65	22	9	32
AAAAACTCGACGCAGAGCTG	101	165	2443	903
AAAAACTCTGCCAAAGTACC	597	786	407	596.667
AAAAACTGCAAGATGTTGCA	231	446	340	339
AAAAACTGCTCTGGACGAGG	64	262	292	206
AAAAACTGGAGCACTACCGT	129	207	158	164.667
AAAAACTGTCCTCAAAAGCA	58	53	177	96
AAAAACTTCTCGTTCCAGAG	101	154	699	318
AAAAACTTGATTAATGACGC	109	67	230	135.333
AAAAAGAAAGACATTGGCCA	97	39	399	178.333
AAAAAGAAATGCTCTACCAG	345	72	52	156.333
AAAAAGAACAGACACACTCG	278	399	127	268
AAAAAGAACAGTCGTAATGG	72	237	223	177.333
AAAAAGAAGCAGATCCAGTG	246	283	418	315.667
AAAAAGAAGCCGAATCCCAG	158	191	373	240.667
AAAAAGAATGTAATTCGCCA	238	83	403	241.333
AAAAAGACACCCATGCAGAA	371	132	88	197
AAAAAGACGGCATAAGCTGT	310	632	172	371.333
AAAAAGAGACAAGACGACAG	207	181	390	259.333
AAAAAGATGCACTCCAGCCA	146	766	288	400
AAAAAGCACCATCCCAGAGT	153	531	3908	1530.67
AAAAAGCCAAACCCTACGAA	21	63	19	34.3333
AAAAAGCTTGTGGCGAAGGG	713	445	601	586.333
AAAAAGTACTCATTTCGGAG	80	1048	333	487
AAAAAGTCCAAGTCGCGCAA	156	203	89	149.333
AAAAAGTCCGCGATTACGTC	283	131	635	349.667
AAAAAGTCGATTTCCTACAA	188	675	274	379
AAAAAGTGAAGGTATTCCCG	26	574	120	240
AAAAAGTGCACCAATAAGAC	419	57	291	255.667
AAAAAGTGTGCAAACACATT	241	448	231	306.667
AAAAATAAAGACAATTGACT	57	157	225	146.333
AAAAATAAAGATAATTGACT	175	146	37	119.333
AAAAATAAGAGTTCCATGCA	2023	844	220	1029
AAAAATACCAAAGTGCTTTG	551	729	316	532
AAAAATACGTAGTAGAGCCC	112	200	85	132.333
AAAAATAGCAGCCGGTCAAG	58	75	42	58.3333
AAAAATATATCCAGAGTGTG	359	118	276	251
AAAAATCCATGAAGGCTGGT	288	261	436	328.333
AAAAATCGCTGTTCTTGAGG	382	11	23	138.667
AAAAATCTAATGATGCACCA	31	209	22	87.3333
AAAAATCTCATGGTGTTCGA	352	132	263	249
AAAAATCTCCAGTGTATCAG	109	146	70	108.333
AAAAATCTTCCCTCCCGTTG	467	605	328	466.667
AAAAATGAAAGTCCCTATGG	267	567	401	411.667
AAAAATGAACAAAGAATGGA	197	113	0	103.333
AAAAATGAGACTAACCTGGT	115	219	371	235
AAAAATGAGTAATTCCCAAG	155	781	373	436.333
AAAAATGATCAATCACATTG	92	84	869	348.333
AAAAATGATTGAAGTCGTGG	895	133	136	388
AAAAATGGTTCACTCATGGA	654	207	646	502.333
AAAAATGTAGAAGACTTCAC	850	12	131	331
AAAAATTAAGATCTCCCGAA	37	245	140	140.667
AAAAATTCAACGTTGAAACA	423	135	98	218.667
AAAAATTCAATTTCATATGG	438	105	401	314.667
AAAAATTCCAAAAATCAGAG	26	122	60	69.3333
AAAAATTCCCTGTGTTTACG	435	140	512	362.333
AAAAATTCTCCAAAACACCA	6	149	29	61.3333
AAAAATTGTAGGACGTACAA	321	10	768	366.333
AAAAATTGTCGAATGCACCA	72	38	155	88.3333
AAAAATTTGAAGGACATACG	34	24	17	25
AAAACAAATAACAGTCACGT	44	321	60	141.667
AAAACAACTCAATATGCATG	134	398	184	238.667
AAAACAAGAAAACGGAGCAG	287	126	204	205.667
AAAACAAGATGCACATCCTC	367	229	1312	636
AAAACAATACTTCCTAGACC	45	198	348	197
AAAACAATCGAGATGCTAAG	16	53	139	69.3333
AAAACAATGAAGATTCTGAG	31	548	1044	541
AAAACACAGCCAATCCAGAC	239	214	172	208.333
AAAACACATACGTCTGTGAG	832	1335	134	767
AAAACACATCAATATAACAT	2	14	21	12.3333
AAAACACCCACTGGACTCGT	28	238	928	398
AAAACACTCAGTAATAGCAA	107	298	83	162.667
AAAACACTCGCAGTCCACTC	634	1113	158	635
AAAACACTTGCATAACGATG	80	100	465	215
AAAACAGAGAAAAATTCTCA	18	55	19	30.6667
AAAACAGAGAAAGATTCTCA	29	98	588	238.333
AAAACAGAGCTGTACAGCAC	720	763	353	612
AAAACAGCGTAAATATGACC	19	24	70	37.6667
AAAACAGCGTCTGGATGATG	160	591	912	554.333
AAAACAGGATTATTCATGGG	273	414	242	309.667
AAAACAGGTTCAGCTTCTAG	17	202	12	77
AAAACAGTCTTCAAGAATCG	97	1938	313	782.667
AAAACAGTCTTGCTACACGA	262	53	120	145
AAAACAGTGTCAGTCCGAGG	460	558	107	375
AAAACAGTGTTCGGTTACCA	58	67	17	47.3333
AAAACAGTTCGCCGTCCAGG	59	64	343	155.333
AAAACATAAGAAGAAACGGC	79	61	78	72.6667
AAAACATAATTTACTCGTAG	134	136	656	308.667
AAAACATGGACTTGGCAACA	203	260	295	252.667
AAAACCAAATATCTACCCCA	8	32	134	58
AAAACCAACTGTGATCGATG	148	604	819	523.667
AAAACCAATAACTTGTGACT	262	1151	238	550.333
AAAACCACAATCTGCCACAG	507	182	128	272.333
AAAACCACCACACGTTCGGT	313	600	569	494
AAAACCACCAGGAAAACCTG	182	672	982	612
AAAACCACCGACGAAATACG	198	1346	230	591.333
AAAACCACGTATATTCGCCA	83	400	384	289
AAAACCACTATGAGGAATGG	737	157	168	354
AAAACCAGAACTTACGTGAG	271	380	229	293.333
AAAACCAGAATAATGGCGTG	417	957	549	641
AAAACCAGCTGATATTAACA	850	165	20	345
AAAACCAGTCACCGTCGATG	638	639	490	589
AAAACCAGTGAGAATCCGAG	365	348	389	367.333
AAAACCATCTTACCCAGCGA	110	13	189	104
AAAACCCAATCCAGTTGAAG	133	48	245	142
AAAACCCACCAACATTCTAG	52	237	251	180
AAAACCCACCAACATTCTGG	83	144	273	166.667
AAAACCCACCAGCATTCTGG	287	188	154	209.667
AAAACCCGGGGATGAACAGT	2992	1836	285	1704.33
AAAACCCTAGAAGTCTGCCT	320	276	92	229.333
AAAACCGAGCACCATCAATG	411	336	433	393.333
AAAACCGGCCGCCGACCCTG	351	176	161	229.333
AAAACCGGGTTGCAGCTCAG	1118	164	219	500.333
AAAACCGGTCACCTTGATCG	983	594	1634	1070.33
AAAACCTAAAAATCTGGTGG	336	289	104	243
AAAACCTAAGTCCGTGTCCG	401	560	1859	940
AAAACCTCAACAGTCCGCGG	495	312	130	312.333
AAAACCTCATTAAATTCTCC	244	28	223	165
AAAACCTCCAAGATTCACAA	65	119	41	75
AAAACCTCCTCAAACAACCG	13	4	64	27
AAAACCTCTTCTCTACGCGG	459	39	658	385.333
AAAACCTGTAAGTTACACGG	1750	633	445	942.667
AAAACCTGTACAAGAAACTT	1418	703	270	797
AAAACCTTCCATCACCTTGG	610	65	73	249.333
AAAACGACAGCCGATGAGTG	220	955	404	526.333
AAAACGACCAGCTGTAAGCG	254	1768	375	799
AAAACGAGAAGAGAACCCTC	49	236	121	135.333
AAAACGAGGTCCCTCGGTGA	42	175	167	128
AAAACGCCGCACTTTCTCCG	98	153	36	95.6667
AAAACGCCTGCACGGTCAAG	744	1489	217	816.667
AAAACGGCTCGATCGGTGAT	298	225	334	285.667
AAAACGGCTTCACTCCCGTG	3326	219	227	1257.33
AAAACGGTCTCAAGCCAATG	136	112	883	377
AAAACGGTTCATAATTACCA	165	58	96	106.333
AAAACGTAATTATACCGAGC	153	124	211	162.667
AAAACGTGGACGTTACCGGG	202	389	708	433
AAAACGTTACCTGATCTAGG	217	125	280	207.333
AAAACGTTGTAGGAGCCCGT	86	191	41	106
AAAACTAAAATCTCTAATGG	76	36	43	51.6667
AAAACTACATGAAATTAAAG	97	5	2	34.6667
AAAACTAGAACTTACCCCAG	90	74	10	58
AAAACTAGTTGCCCTCAACC	122	286	32	146.667
AAAACTAGTTTGAGCCGTAG	87	170	215	157.333
AAAACTATACGGATGAGACA	58	576	613	415.667
AAAACTATAGACATACCTCA	230	45	52	109
AAAACTCAGCCTTTGAGATG	881	149	278	436
AAAACTCATCAGAAACACTG	56	6	67	43
AAAACTCCCCAACAAAGGAA	14	121	32	55.6667
AAAACTCGGTGTACCTCGTG	435	363	1704	834
AAAACTCTCCGTAATAACAA	95	524	67	228.667
AAAACTCTGATTGTTCAATG	3196	431	502	1376.33
AAAACTGAAGACTTGACAGA	44	68	158	90
AAAACTGAAGTTAAAGGAGA	378	152	247	259
AAAACTGCACTAGCGATGGA	332	355	543	410
AAAACTGCAGTGCACAGCCG	609	355	1423	795.667
AAAACTGCCCATGTTCTCCG	329	80	397	268.667
AAAACTGCTAACAGGATCCG	411	834	1058	767.667
AAAACTGGAAATCTAAGCAA	288	97	175	186.667
AAAACTGGAATAGGTGCCAA	69	557	1330	652
AAAACTGGCGCATCTTAGTG	278	302	79	219.667
AAAACTGTCATACATGAATC	138	452	162	250.667
AAAACTGTGTCATACATTCA	606	215	184	335
AAAACTTAAACATCACAATG	18	12	425	151.667
AAAACTTAAGGGTCTCCGCG	387	833	1537	919
AAAACTTACCATGAAAGAGA	64	3	116	61
AAAACTTAGAGCATACATCA	118	71	102	97
AAAACTTGAGGAACTTCCAG	2	9	3	4.66667
AAAAGAAAATAACTCACCAG	9	45	19	24.3333
AAAAGAAACACGGGCAACTG	128	116	107	117
AAAAGAACAAGGCGTCGGAG	58	37	13	36
AAAAGAACCATTGAACATTG	138	185	95	139.333
AAAAGAACCCACTCCCAGAG	160	289	205	218
AAAAGAACCCGCTCCCAGAG	32	227	148	135.667
AAAAGAACCTGCTCCCAGAG	244	31	70	115
AAAAGAACTGAGTCAAACAG	112	113	118	114.333
AAAAGAACTTAATCTACATG	459	1079	143	560.333
AAAAGAAGGGATATGTACAG	118	249	588	318.333
AAAAGAAGTAAATATACCTG	26	586	193	268.333
AAAAGAAGTACATTTGTGCA	683	65	114	287.333
AAAAGAAGTAGGTTTCCGAG	33	145	65	81
AAAAGAATAAGAAGAATGGA	1012	38	85	378.333
AAAAGAATCGAATACGCAAA	199	55	132	128.667
AAAAGAATGACAAGAATGGA	282	548	102	310.667
AAAAGAATGAGTTCTAATTG	669	446	71	395.333
AAAAGAATGTGGATGCGCGG	165	163	465	264.333
AAAAGACAAAAAAGGTGGGA	163	330	143	212
AAAAGACAGCATTTCATCCT	452	529	523	501.333
AAAAGACCAAGGTCGGAACA	925	5099	179	2067.67
AAAAGACCGGACCAGAGCCT	91	318	26	145
AAAAGACGAACATACTTCTG	185	138	680	334.333
AAAAGACGCTGACCGCCTTG	244	556	85	295
AAAAGACTATACACAGCTTG	169	150	495	271.333
AAAAGACTATATCCTATGTG	275	1119	198	530.667
AAAAGAGAAATACCCACTGG	74	244	81	133
AAAAGAGAACGTATACCCCG	119	1939	338	798.667
AAAAGAGACTAACGTTTCAA	1036	255	527	606
AAAAGAGCATTATCCGAATG	225	733	210	389.333
AAAAGAGCCCGCTCCCAGAG	180	121	204	168.333
AAAAGAGGAACACTTACCGT	48	37	29	38
AAAAGAGTCATGTTACCATG	4007	721	950	1892.67
AAAAGATACAGGATTGTCTG	125	152	907	394.667
AAAAGATGCATAACATACTG	46	74	433	184.333
AAAAGATGGGATACAAGAGT	138	349	368	285
AAAAGCAAAAGACACATCCG	840	856	199	631.667
AAAAGCAAGAGACCTAAGCA	135	3166	87	1129.33
AAAAGCAAGGAAGTTACGGT	78	1899	51	676
AAAAGCAAGTACATGGCCAC	466	360	385	403.667
AAAAGCACCGATGCCGACCT	532	293	353	392.667
AAAAGCAGCACACGACGTCG	738	607	164	503
AAAAGCAGCCGATCTGGCGT	795	529	572	632
AAAAGCAGGTCACCAAGTCG	129	183	119	143.667
AAAAGCAGGTGCAGGTCGAT	376	275	157	269.333
AAAAGCATGCTTACATGGTG	510	207	740	485.667
AAAAGCCAACACAATTGCAT	96	166	640	300.667
AAAAGCCATAGCCACCAGGA	1118	361	1520	999.667
AAAAGCCCATCAAGTCTCCA	133	2414	517	1021.33
AAAAGCCCGGGATTCCCAGG	773	565	382	573.333
AAAAGCCGACCTTATAGACA	102	102	464	222.667
AAAAGCGATAATGAGTACGG	101	213	262	192
AAAAGCGCATTGCAATTCAG	83	957	222	420.667
AAAAGCGTGTTGACAGCGGG	93	178	757	342.667
AAAAGCTACCAAGATCAAAG	36	39	30	35
AAAAGCTCTAGGTCGAATGG	470	585	325	460
AAAAGCTGCCAGGAATCCTG	459	160	465	361.333
AAAAGCTGGGACCCTTGAGA	606	513	268	462.333
AAAAGCTTTAGCCAGCACTC	1638	324	465	809
AAAAGCTTTAGGAATCGGGA	1348	125	48	507
AAAAGGAACTGAGAGTCTTG	253	439	933	541.667
AAAAGGAATACCAAAAGTGG	158	55	224	145.667
AAAAGGAATATGATAGAGTG	63	1113	441	539
AAAAGGACCTGCAAGTGTCA	264	233	482	326.333
AAAAGGACTTCCACGAACCG	394	352	41	262.333
AAAAGGAGTAAACAAACCTG	93	292	171	185.333
AAAAGGAGTAAGCACACCTG	642	255	1262	719.667
AAAAGGATGGGTACTACGTG	400	348	101	283
AAAAGGATGGGTTCTAGATG	888	993	1385	1088.67
AAAAGGATGGGTTCTAGGTG	43	159	6644	2282
AAAAGGCACCCAGAACAGTG	1384	273	636	764.333
AAAAGGCAGAGATGATACCC	64	34	108	68.6667
AAAAGGCCCATTACCCAATG	630	546	1448	874.667
AAAAGGCCGATCAAACATCA	779	61	285	375
AAAAGGCGATTGAAGCAAGG	121	198	285	201.333
AAAAGGCGTTAAACGGAAAG	88	207	120	138.333
AAAAGGGATTGGATGCACAC	5	36	225	88.6667
AAAAGGGCTGATCTTGATGG	734	564	307	535
AAAAGGGGAAGCGCGCCTGT	253	256	253	254
AAAAGGGGAGCGATGCGGAG	2158	293	1052	1167.67
AAAAGGGGCATTCAGTCGAG	1976	426	587	996.333
AAAAGGGTTGGTTCTAGGTG	904	545	626	691.667
AAAAGGTATGAACACACTTG	1130	185	205	506.667
AAAAGGTATGAACCCAAACA	102	4799	38	1646.33
AAAAGGTCATCTTCCAACAC	175	90	194	153
AAAAGGTGATGCCTACCCGA	142	1070	434	548.667
AAAAGGTTGCGCACGTAAGG	72	155	293	173.333
AAAAGTCAAACTTTACCAAG	117	386	279	260.667
AAAAGTCACATACTACTGGA	121	174	311	202
AAAAGTCAGCTGTCGTGTCG	532	472	660	554.667
AAAAGTCCCTGGGATCGTGT	191	336	153	226.667
AAAAGTCTGGGGCTAAGTAG	117	70	129	105.333
AAAAGTCTTACATGACACAA	8	155	183	115.333
AAAAGTGAAAGGTGTCCAGT	256	806	467	509.667
AAAAGTGATCAACTAAGTTG	1282	1097	56	811.667
AAAAGTGATGAGACCAACCA	324	240	624	396
AAAAGTGCATAGGTGTCTGA	542	537	450	509.667
AAAAGTGGACCAAACCCATG	105	588	409	367.333
AAAAGTGGGAAGTACGTGCT	3	63	15	27
AAAAGTGGTATCAGTGACAT	1435	960	696	1030.33
AAAAGTGTCCCCACAAGCTA	212	261	73	182
AAAAGTTACTACAGTGCTCG	367	495	692	518
AAAAGTTATCGCCAAGAGGG	170	9	119	99.3333
AAAAGTTCGGAACTGACCGT	298	1267	791	785.333
AAAAGTTCGTAGCAGACCTG	826	245	377	482.667
AAAAGTTCTACCTACCCCAA	794	563	73	476.667
AAAAGTTGCCAACTCTTCCG	373	143	110	208.667
AAAAGTTGGAAAACGACCCC	38	171	358	189
AAAAGTTGTCGTCGTCTATG	750	228	809	595.667
AAAATAAAAGGACCAGCCGT	341	147	255	247.667
AAAATAAAGGGACATCTGCA	167	255	106	176
AAAATAAAGTGACTGACCTG	803	198	213	404.667
AAAATACAACAGTTTCTGGA	39	335	92	155.333
AAAATACAGAACCTTCTGGA	19	177	200	132
AAAATACCATTTGTTATCCC	263	115	1465	614.333
AAAATACCTTGGCATCAACA	31	20	75	42
AAAATACTTCATAAAGAACA	56	34	280	123.333
AAAATAGAAGTGCTAATGAA	13	58	33	34.6667
AAAATAGAATCTGCTTTCCG	121	133	43	99
AAAATAGAATGTAGTATTGC	292	354	156	267.333
AAAATAGAGGGTACAGCCGT	1037	260	372	556.333
AAAATAGCATCAGAGATATG	523	1565	370	819.333
AAAATAGGAACAGTTTCTAC	45	92	38	58.3333
AAAATATAGAATGAGAACAC	810	214	438	487.333
AAAATCAAGGAGGAAAACCG	140	46	590	258.667
AAAATCACCAAAGCCTACTG	63	134	415	204
AAAATCACCTATAAGAACCT	62	149	31	80.6667
AAAATCATCATGAACTACAG	164	22	164	116.667
AAAATCATTGACATCACCGG	60	122	150	110.667
AAAATCCAGAAAAACTCACA	116	45	123	94.6667
AAAATCCAGGCGAGTTTCCG	1586	567	1105	1086
AAAATCCATAATAAGCATCG	128	74	30	77.3333
AAAATCGAATCATACAGCTG	572	227	975	591.333
AAAATCGAGATCCCCCCGCA	68	24	48	46.6667
AAAATCGCCCTATTCCTCAG	12	7	6	8.33333
AAAATCGGAGCATGTCGTCA	36	46	60	47.3333
AAAATCGTCCCATTCCACAA	11	54	60	41.6667
AAAATCTAGGTTCTGGCCAA	106	34	213	117.667
AAAATCTGAGCCTTGATCCG	882	801	2056	1246.33
AAAATCTGGAACTTATGGCC	265	101	721	362.333
AAAATCTGTCTAATCCGCCA	20	95	58	57.6667
AAAATCTGTGCCGATCACAC	36	85	13	44.6667
AAAATCTTTGTCTGAAAAAA	36	7	2	15
AAAATGAAAAGAAATACACC	100	162	15	92.3333
AAAATGAAAGACTGCCTGAG	1176	740	695	870.333
AAAATGAAGAGCGATGAGCT	81	352	407	280
AAAATGAATATGGCCTTCGG	246	122	79	149
AAAATGAATCAAGAATTAGC	64	302	12	126
AAAATGAATCAAGAATTATG	22	200	68	96.6667
AAAATGAATCAATGGTCCTG	484	306	1744	844.667
AAAATGACAGTCGTAGTAAG	161	448	490	366.333
AAAATGACAGTGACGCACTG	230	251	462	314.333
AAAATGATTGACACCAAAGG	35	966	647	549.333
AAAATGCAAAGACAATGTGA	518	170	663	450.333
AAAATGCATCGCTAGCAAGT	2844	285	202	1110.33
AAAATGCCTCCCTATGTGTG	1109	143	24	425.333
AAAATGCTCCTTGATAACAT	39	253	178	156.667
AAAATGCTCTGAATACCCAT	247	395	179	273.667
AAAATGCTTCGGAAGTAGCG	197	109	95	133.667
AAAATGGACCCACTGACGGT	191	1334	606	710.333
AAAATGGACGCTCACCGGGG	224	233	309	255.333
AAAATGGCAACTTAGCACAT	247	272	65	194.667
AAAATGGCCAATTCGTTACG	530	2341	527	1132.67
AAAATGGCTCCCGACACTAG	698	193	655	515.333
AAAATGGGAACTTCTTTATG	806	270	236	437.333
AAAATGGTTACACCTCCCGA	16	220	65	100.333
AAAATGGTTTGTGTCCCAAG	453	191	400	348
AAAATGTAAAGCATGTGTCC	203	499	153	285
AAAATGTAAAGCCTATGTCA	109	886	844	613
AAAATGTAAAGCGTGTGTCC	131	393	260	261.333
AAAATGTACTCACCAGGGAG	247	598	115	320
AAAATGTCACCTTTCCCCAT	554	2203	276	1011
AAAATGTCCATCCTTGGCAA	124	235	419	259.333
AAAATGTCTTCAAACATTGT	214	475	352	347
AAAATGTTATTATTTCAACA	84	20	17	40.3333
AAAATGTTCAAGGGCAAACG	11	77	296	128
AAAATGTTCTTACTGTAATG	1042	235	337	538
AAAATGTTGAACAAATCACC	192	518	127	279
AAAATGTTGTGAAATATCGT	130	331	78	179.667
AAAATTACAAGAAATTGCTG	188	163	64	138.333
AAAATTAGCCTGGAGAACGT	77	705	631	471
AAAATTATGCACAATCCTAG	219	354	58	210.333
AAAATTCAAAGAAGTCGCCG	31	15	112	52.6667
AAAATTCAAGCTAATCACTG	89	20	6	38.3333
AAAATTCAGTGACTCCCAAA	426	129	129	228
AAAATTCTACTAACAATACG	6	137	42	61.6667
AAAATTCTAGAAGAAACGGA	52	121	1104	425.667
AAAATTCTCAGTAATAGCAA	15	193	61	89.6667
AAAATTCTCCTTACTCTCTG	149	103	82	111.333
AAAATTCTGGAAGACATGGA	179	574	499	417.333
AAAATTCTTTACAGTACACC	105	265	2144	838
AAAATTGACAGCTTTCACGG	180	251	70	167
AAAATTGCACCTTCCCGGCC	193	476	1161	610
AAAATTGCGAATGCCTATCG	189	584	215	329.333
AAAATTGGACCCGAATGTGT	342	779	498	539.667
AAAATTGGAGATTCCTACCG	495	1196	176	622.333
AAAATTGGATCTCCCATGAG	336	742	686	588
AAAATTGGATGCCCAACTAG	98	211	358	222.333
AAAATTGTGTTGTAGCGTAG	619	260	163	347.333
AAAATTTGGACCCTTCGCTG	499	700	171	456.667
AAAATTTGGATCCGAACATG	2080	384	936	1133.33
AAACAAAACTATTCAATGAG	17	709	266	330.667
AAACAAAAGAGTAGCAGGCT	459	197	1260	638.667
AAACAAAGAAAACTTGCCCC	59	291	379	243
AAACAAAGTCAACACTCTTG	874	955	679	836
AAACAAATAATGAACTCCTG	295	52	270	205.667
AAACAAATAGACAGATAGGA	123	71	131	108.333
AAACAACAGACAGACGTCCA	174	1069	180	474.333
AAACAACAGATGTCTACGAT	183	656	355	398
AAACAACGCATATCCTCACA	53	85	146	94.6667
AAACAAGAAACAGATTGGCT	39	270	208	172.333
AAACAAGAAACTGACAGCGT	368	125	450	314.333
AAACAAGAAGCCCCTTTATG	206	434	265	301.667
AAACAAGAATGCAAGTGTCA	119	281	212	204
AAACAAGACATGTGACGACG	881	343	508	577.333
AAACAAGAGCACACTCCCCG	28	167	36	77
AAACAAGAGTCTGCCGACTG	80	43	41	54.6667
AAACAAGCAGCAGTCTCTCG	844	154	1179	725.667
AAACAAGCCCGAACTCACGC	75	254	31	120
AAACAAGCGTCCACCATCGG	1547	804	711	1020.67
AAACAAGCTGGAAATATGGG	373	110	128	203.667
AAACAAGGCAAGTGACACCT	873	655	777	768.333
AAACAAGTACTTTCTCAACG	50	48	81	59.6667
AAACAAGTCATAGACGGCAT	180	571	96	282.333
AAACAAGTCGGGCAAACAGA	493	711	532	578.667
AAACAAGTTACACTTGAGAG	426	461	68	318.333
AAACAAGTTCTCAGCTCTAG	404	910	463	592.333
AAACAATACAATGCTAAAGG	166	187	95	149.333
AAACAATACAGTGCCGCCGT	55	77	213	115
AAACAATCCTTTGTAGACCC	221	1057	368	548.667
AAACAATCTTCTGACAAACA	133	14	284	143.667
AAACAATTAAATCTTCTACT	58	17	108	61
AAACAATTAGGTTGCTAGGT	105	1657	339	700.333
AAACAATTGTGTGATGCCTG	376	576	1675	875.667
AAACAATTTCCTGTAACCCG	392	382	508	427.333
AAACACAAAAAGCAGAGATC	24	16	63	34.3333
AAACACAAAAGTGTCTGCGA	482	66	56	201.333
AAACACAACTGCTGATCCTG	122	231	436	263
AAACACAGAATATAACCCAA	72	288	7	122.333
AAACACCAATGAGTACACAG	53	18	197	89.3333
AAACACCAGGATCCCATCCA	770	1336	403	836.333
AAACACCATGTGATAGAGAT	378	340	1498	738.667
AAACACCCATATTTCCAAGT	135	325	438	299.333
AAACACCCGCCGGTACCCTC	304	122	285	237
AAACACCTGTAATAAGTATG	228	537	337	367.333
AAACACGACTATGCTAAACA	679	417	244	446.667
AAACACGACTCAGAATACGC	155	180	29	121.333
AAACACGATTACTAGCAGAG	522	243	86	283.667
AAACACTCACACCCTAGTGA	215	403	328	315.333
AAACACTTACTTGACGGACA	196	31	4	77
AAACAGAAACTCAACTACCG	15	15	90	40
AAACAGAAAGACATTGGCCA	27	21	25	24.3333
AAACAGAAAGACATTGGCTA	493	186	495	391.333
AAACAGAAAGTAGATATTGG	345	792	276	471
AAACAGAAAGTCATTGGCCA	555	619	456	543.333
AAACAGAACTAGACTTCACG	623	279	99	333.667
AAACAGAAGCGTGAGACCCA	22	71	216	103
AAACAGAATAGACCAAAAGG	27	1	73	33.6667
AAACAGAATCCACTCCACTG	1119	1254	152	841.667
AAACAGAATGTTGGAACTTG	267	1163	488	639.333
AAACAGACAGACATTGGCCA	536	151	71	252.667
AAACAGAGACACACTTCTCG	121	675	370	388.667
AAACAGATACTTACTGTGAG	739	1086	1130	985
AAACAGCGTTACTTAGGCAA	226	367	163	252
AAACAGCTTGGTAATTGCAT	369	239	592	400
AAACAGGAAGACATTGGCCA	189	266	584	346.333
AAACAGGACGTAGCCATACG	39	217	402	219.333
AAACAGGACTAGCAGACCAG	247	1034	459	580
AAACAGGATATCAGGAATAG	538	200	139	292.333
AAACAGGCCCACTTGAAGGG	83	64	24	57
AAACAGGGCGAGAGCCATAG	194	132	160	162
AAACAGGGTCTCATCCACAT	608	418	580	535.333
AAACAGGTTGTCACAAAGCA	82	112	117	103.667
AAACAGTAAGCACAGAGTGC	244	631	269	381.333
AAACAGTACTCATATATCAC	103	67	417	195.667
AAACAGTCACAATTGACCCC	50	168	175	131
AAACAGTGAAACTTACAACC	392	170	16	192.667
AAACATAAAAAACTATGAAG	0	12	4	5.33333
AAACATAAGACAGCCATTGG	1881	311	876	1022.67
AAACATAATACATTACACCC	117	269	276	220.667
AAACATACTTCTTATACCTG	508	533	518	519.667
AAACATAGCAACCATAGACG	19	10	4	11
AAACATATAGTGTACCTCTA	242	685	815	580.667
AAACATATGAAAAGTCACAT	311	68	616	331.667
AAACATATGAAAATCATCAT	45	18	231	98
AAACATCAGACAACTCATAC	114	50	50	71.3333
AAACATCAGATAATACAGAT	42	27	21	30
AAACATCATAAGTATCTTCG	161	149	175	161.667
AAACATCATTATGTGAACCA	273	174	95	180.667
AAACATCGAAGTGCTAAACA	80	64	161	101.667
AAACATCTAAAGAAGACACG	35	256	517	269.333
AAACATCTTGTGTACGAAGA	355	389	65	269.667
AAACATGAGAGATTTGCCAG	1063	839	4468	2123.33
AAACATGAGTGAGATCGCAA	31	3	11	15
AAACATGAGTGGGTTAAACA	401	1185	329	638.333
AAACATGATCTTGAACAAGG	12	163	180	118.333
AAACATGTCATAGTCTTCCG	51	22	123	65.3333
AAACATGTCCATGAAACCGC	21	149	5	58.3333
AAACATGTGGCTTCAAAAGG	545	320	280	381.667
AAACATTACCCCACTCCTAG	16	65	159	80
AAACATTACTGCTATGGACA	351	892	153	465.333
AAACATTACTTACGTAACTG	380	783	83	415.333
AAACATTATTAATGGCCGAG	225	1814	762	933.667
AAACATTCACACACAAAGCA	24	370	64	152.667
AAACATTGCGCAGAGAACAT	134	262	439	278.333
AAACCAACGACCTCCAGGCG	780	132	408	440
AAACCAACGAGACTAGCATG	140	299	648	362.333
AAACCAACGGGATTACCCCG	265	1328	614	735.667
AAACCAAGGGCGGCAGTTAG	471	795	168	478
AAACCACAATTTGCAACTGT	248	565	994	602.333
AAACCACACATAGAGAAATC	2503	149	29	893.667
AAACCACAGAAGCTACAACC	30	64	154	82.6667
AAACCACCGGTTGGAAACAG	394	167	150	237
AAACCACCGTACATGTCTAG	35	106	179	106.667
AAACCACTATGATCCCACCA	395	415	200	336.667
AAACCAGAGCGATGATCTGT	118	112	192	140.667
AAACCAGGAAAGAGAGTGTG	53	1354	16	474.333
AAACCAGGGCGCTGGCGAGG	132	209	171	170.667
AAACCAGTATCTAGACAAGG	93	81	21	65
AAACCAGTCATACCACCCAA	12	16	16	14.6667
AAACCATCATCAGTTACATA	10	82	205	99
AAACCATCCTCCACGGAAGG	760	467	418	548.333
AAACCATCTGGGTTAAAGCG	650	478	164	430.667
AAACCATGGATCCACCTGCC	4048	377	235	1553.33
AAACCATGTTTAGGACTCGG	327	73	101	167
AAACCATTGAGTCTCCACAG	21	35	25	27
AAACCCAAAAGCTAGTGTGA	173	1339	168	560
AAACCCAAATCAATTCGGGC	836	196	42	358
AAACCCAACTGACGAATACC	325	304	64	231
AAACCCACAAAAACAGTATG	34	20	98	50.6667
AAACCCACAACATGGACCGG	1344	616	763	907.667
AAACCCACAAGTCTTGACAA	103	424	888	471.667
AAACCCACACAAAACACGAA	192	46	37	91.6667
AAACCCACATACCTTCTAGG	35	68	54	52.3333
AAACCCACATGTCCAGCATG	972	551	530	684.333
AAACCCACTAACTTACACAG	350	387	162	299.667
AAACCCAGAATTCTACGATG	330	351	402	361
AAACCCAGAGCATCTACTGA	27	755	1006	596
AAACCCATATGATCCCACAG	103	189	600	297.333
AAACCCATGAGATGCAAGGT	253	247	605	368.333
AAACCCATTATTAACGCGAA	1499	209	114	607.333
AAACCCCATGAACCCGAGTG	3	162	15	60
AAACCCCCGCGCGGAGCGTC	346	201	432	326.333
AAACCCGGTGGACCATATGT	301	653	484	479.333
AAACCCTGAGCATGTCCATG	119	189	234	180.667
AAACCCTGCCAAAAAATGGA	26	43	162	77
AAACCCTGGAACAAACACCT	35	28	90	51
AAACCCTGGCTGATTCAAGG	627	210	107	314.667
AAACCCTTCCATCACCTTGG	388	103	24	171.667
AAACCCTTCGATGAGATCGG	306	140	432	292.667
AAACCCTTCTATCACTTTGG	674	281	343	432.667
AAACCGAACCATCACAGAAG	83	141	101	108.333
AAACCGAAGGCTGCACCAAG	102	308	315	241.667
AAACCGACGGCGAGTTACTG	667	953	152	590.667
AAACCGGTTTAGGAATTCAA	129	46	46	73.6667
AAACCGTAACTATGATGAGG	221	274	379	291.333
AAACCGTTTATCCAAAAGCT	257	331	525	371
AAACCTAAGCCATCAAACTG	94	163	505	254
AAACCTACCGTAATTATCAG	572	1065	89	575.333
AAACCTACTCTATACATCCA	1776	156	179	703.667
AAACCTAGCCGGATTCCTCG	195	335	323	284.333
AAACCTAGCGTAGATTCGGC	82	392	199	224.333
AAACCTAGGAAATAAAAAGG	4	9	3	5.33333
AAACCTATGACACGTACGTG	503	403	365	423.667
AAACCTCAAGAGCAAACTCG	349	352	219	306.667
AAACCTCAAGATGTCCGGGT	203	149	155	169
AAACCTCTTCCGTCGCCTAG	149	132	269	183.333
AAACCTCTTTGCTTGACCAG	105	67	182	118
AAACCTGAAGAGGTCAACTG	1127	521	311	653
AAACCTGCTAGCCTCGTTCG	158	428	168	251.333
AAACCTGGGAAGAGTACACA	131	176	277	194.667
AAACCTGGTGGCATAGAGAG	24	26	46	32
AAACCTTATTACCCAACAGG	89	18	97	68
AAACCTTATTGAACCACTCA	15	29	2	15.3333
AAACCTTCATCTAAAAGGCG	601	38	341	326.667
AAACCTTGAGGAACTTCCAG	20	17	10	15.6667
AAACCTTTCAGTTACATGAG	723	457	291	490.333
AAACGAAATCAATGACACTG	318	935	103	452
AAACGAACTGGCTCACAAGG	405	231	140	258.667
AAACGAACTTGTAGCCACAG	610	182	167	319.667
AAACGAAGGCAAGCTGGAAA	388	804	125	439
AAACGACATGACTGGTGTGT	354	148	1125	542.333
AAACGACGGAAGTCCAGTGA	234	172	220	208.667
AAACGACGTTGTTCGATACA	143	836	761	580
AAACGAGCTACTGACCAACA	391	148	260	266.333
AAACGAGCTTGCTATCGGGA	239	252	348	279.667
AAACGAGGCTGGATTTACCA	544	117	84	248.333
AAACGAGGCTGTTCGTACAC	740	248	600	529.333
AAACGATCAGCTCGGATGTG	160	215	660	345
AAACGATCTACAAGGCTAAG	240	38	94	124
AAACGATCTACAAGGCTGAA	188	268	5	153.667
AAACGATGCCCACATAGATG	181	579	282	347.333
AAACGCACAACTCTACCCTG	296	1010	166	490.667
AAACGCCAAGAAGCTGGAGG	263	210	419	297.333
AAACGCCACACGTAGCGTTG	397	896	1042	778.333
AAACGCCCTAATCGGTCGAG	767	384	2226	1125.67
AAACGCCCTACACCAGGAGT	239	1168	1228	878.333
AAACGCCCTGATCATCGCGA	184	233	636	351
AAACGCGCTGTGTAATCAGA	110	741	81	310.667
AAACGCTACCTGAATTCTGG	41	117	303	153.667
AAACGCTATAACCATCACCC	80	194	377	217
AAACGGAAACCTCCTGCCAT	734	805	260	599.667
AAACGGAACTCACTGCAGAA	139	201	25	121.667
AAACGGAATCAAGGTTACAG	17	6	1	8
AAACGGACAGATGGGACCAA	526	135	605	422
AAACGGACATCCCGACACTG	206	151	624	327
AAACGGATCAGGATTCGTAG	87	96	244	142.333
AAACGGATGGGAAACCCGTG	33	507	93	211
AAACGGCAAATCCTCAGACA	22	72	76	56.6667
AAACGGCCAAGTGCTAGGTG	346	521	216	361
AAACGGCCACATTGGATCAG	256	402	184	280.667
AAACGGGACATTGTTGTATG	617	639	491	582.333
AAACGGGAGACATGAGAACA	660	612	1147	806.333
AAACGGGCTAACCTTCCGAA	1041	649	534	741.333
AAACGGGGGAGTCCTTGATA	544	199	1165	636
AAACGGGTACGGGAATACAA	35	190	113	112.667
AAACGGTAGACTACCCACCA	133	340	434	302.333
AAACGGTTACTTACGATCAT	370	337	151	286
AAACGGTTTAAGTCAAAACA	11	61	41	37.6667
AAACGGTTTCCATAGATCAG	380	166	403	316.333
AAACGTAAGACAATTACCAG	39	37	177	84.3333
AAACGTATACTGGCACATGT	79	148	631	286
AAACGTATTGTAGTGTCCTG	1599	1085	311	998.333
AAACGTCCCTATGACGAAGT	385	564	190	379.667
AAACGTGGGACGTACCCCGG	1190	225	856	757
AAACGTGTACTTGAACAGAA	56	173	32	87
AAACGTGTCAATCTCTGCCG	209	592	619	473.333
AAACGTGTCTTTAATAACAA	78	190	78	115.333
AAACGTTACCTGTTTCGCCA	188	710	323	407
AAACGTTATGATCTGGACCA	335	150	778	421
AAACGTTGAATCCTGATAGG	9	36	22	22.3333
AAACGTTGTACCCAAGACGG	229	1079	246	518
AAACGTTTAGTGCCAGAGTG	455	942	368	588.333
AAACTAAAGATCCACCAGCG	163	488	419	356.667
AAACTAAATAGGGTATGCTG	49	85	241	125
AAACTAACTCGTGAACCTAG	407	116	30	184.333
AAACTAAGAGTCCATTGGCG	191	492	370	351
AAACTAAGGTATTACCCATG	341	91	83	171.667
AAACTAATACCCATACAGTG	686	424	237	449
AAACTAATAGTTCATGTCGG	351	299	836	495.333
AAACTACTACCCTATTCCAG	24	10	17	17
AAACTAGCTCGGGACGAGCA	718	691	433	614
AAACTAGGCTATCCATTCTG	183	245	192	206.667
AAACTATAAGGAGCTATCGG	343	28	428	266.333
AAACTATGACCACAAATGCC	414	553	271	412.667
AAACTATGACCCCTCGCCAG	1078	429	492	666.333
AAACTATGCCATTAATCGCT	71	65	158	98
AAACTCAACTCCTTCGCCGA	122	26	131	93
AAACTCAAGCCATCAAACCC	543	186	195	308
AAACTCAATAGGGCAACGGA	12	11	24	15.6667
AAACTCAATTGATTTAATGG	44	69	133	82
AAACTCACAGTGTGTCAACG	149	66	24	79.6667
AAACTCACCAGGCTGAACCG	71	808	243	374
AAACTCAGTGTCCTGATTAG	277	1093	633	667.667
AAACTCATACGTAGCGAATC	402	452	1151	668.333
AAACTCATGGCAGTCCACAA	462	475	150	362.333
AAACTCATTATGAGAAGGTA	2310	1903	1090	1767.67
AAACTCCATACTTACCCACG	805	285	614	568
AAACTCCCCAAGGGTAATGG	1850	688	445	994.333
AAACTCCCGTGTCAACCGAT	274	929	1309	837.333
AAACTCCCTACCTTTCAGTG	38	213	126	125.667
AAACTCCGGAGCGTTATCGT	715	817	1469	1000.33
AAACTCCTAAAACAATTGAA	19	69	44	44
AAACTCCTAAAACGAGAGAA	65	56	217	112.667
AAACTCCTGCAACCTGACCG	516	4323	285	1708
AAACTCGACGGTCATGCGAA	112	49	267	142.667
AAACTCGAGTGACACCCACT	125	716	255	365.333
AAACTCGGTGTCAATCATCG	662	200	770	544
AAACTCTAAGACAAATAGAG	7	6	16	9.66667
AAACTCTATGAGTTTCGTCG	35	30	75	46.6667
AAACTCTGTACAGATACACA	79	37	180	98.6667
AAACTCTTGAAGAAGGACCC	136	3071	245	1150.67
AAACTGAAAACCATTGAACA	30	162	93	95
AAACTGAAAGTGGAATGTGT	202	108	468	259.333
AAACTGAAGGTGGAATGTGT	43	132	157	110.667
AAACTGACATTAAAAGTAAG	79	589	91	253
AAACTGACCCAGTTGTCTTG	524	593	334	483.667
AAACTGACGTGTGACTGCAC	419	122	1297	612.667
AAACTGATACCAAAATGTGA	23	70	653	248.667
AAACTGATAGAAGACGAGAT	675	335	2604	1204.67
AAACTGCAAATTGAAGGCGA	262	1052	657	657
AAACTGCACAGGCAGACAGT	221	343	313	292.333
AAACTGCCCTTACTACAACG	36	66	365	155.667
AAACTGCCTTAACAAACGAG	100	4648	150	1632.67
AAACTGCGGAACTCAGCGAA	87	139	925	383.667
AAACTGCGGGTGTAACAACA	302	252	525	359.667
AAACTGCGTCCCTTCAGCCG	178	161	614	317.667
AAACTGCTCTGGTGACATGT	188	196	427	270.333
AAACTGCTGAACCTTCACCA	45	268	153	155.333
AAACTGCTTAAGACTCCCAG	48	88	25	53.6667
AAACTGCTTGTAGGCTAAAG	141	164	468	257.667
AAACTGGAGAACAACATGCG	167	221	106	164.667
AAACTGGCGACCAGTCACAC	1104	260	138	500.667
AAACTGGGATTACCATGCGG	5	10	13	9.33333
AAACTGGGCTAGATTTCGAA	149	36	78	87.6667
AAACTGGGGCAACAAATACG	728	236	205	389.667
AAACTGGTATGTTTACAATG	184	150	648	327.333
AAACTGTATATTAATTTGGT	548	807	1145	833.333
AAACTGTCAGCATAAAACGA	50	653	233	312
AAACTGTCCAAAACATTGAG	86	20	217	107.667
AAACTGTGTGGTATTTGAGT	1559	897	673	1043
AAACTGTTCCATTATCACAA	481	30	142	217.667
AAACTGTTCTAAGATAGCCC	743	119	2449	1103.67
AAACTGTTTAGGAATACACT	26	403	36	155
AAACTTAAAATCAAGCTGGG	57	172	70	99.6667
AAACTTAATATTTGACACAG	94	519	599	404
AAACTTACCAGAAACCATGG	248	64	129	147
AAACTTATGCAAATCATCCA	83	267	84	144.667
AAACTTCAAAACAGCTTCGC	14	76	138	76
AAACTTCCATCTTCAAACTG	50	183	298	177
AAACTTCTAGAAGTCTTGGA	62	1510	144	572
AAACTTCTAGACGTCATGGA	316	47	86	149.667
AAACTTCTCGAAGTCATGGA	7	10	0	5.66667
AAACTTGGAATATATCACAT	585	60	83	242.667
AAACTTGGCGAGGAAGATCA	115	142	382	213
AAACTTGGTATCAACACCAA	830	213	117	386.667
AAACTTTCACCAATCCCAGG	165	58	124	115.667
AAACTTTCGGAACACGCCCA	92	281	258	210.333
AAACTTTCTAGCTTACACTG	351	229	170	250
AAAGAAAAAAAGATCTACTG	17	36	77	43.3333
AAAGAAAACATATCATCACC	272	336	574	394
AAAGAAACAGCAATATAACA	120	6	19	48.3333
AAAGAAACTATGTCCTCTGG	474	328	36	279.333
AAAGAAACTCAATGCATCAC	53	412	776	413.667
AAAGAAAGCCTGCATATTAG	766	939	2304	1336.33
AAAGAAAGTGATTGTCACTG	289	259	1553	700.333
AAAGAAATACAGTTACGATG	130	34	167	110.333
AAAGAAATCGAAAGGAAACA	94	459	70	207.667
AAAGAAATGTACCCGCAGGA	376	70	70	172
AAAGAAATTTCATGACGGAG	153	267	519	313
AAAGAACACGAAGTGGCCTG	105	1423	451	659.667
AAAGAACACGGTAATGTGCG	218	914	184	438.667
AAAGAACAGGACTTCCAGGG	2162	408	220	930
AAAGAACATTTGGATCAGAC	829	75	219	374.333
AAAGAACCAACCCCCTAACA	190	65	108	121
AAAGAACCAAGTACTAACCC	129	117	203	149.667
AAAGAACCTAAAGTCATACT	29	1273	164	488.667
AAAGAACCTGACGGCAACGC	58	37	16	37
AAAGAACTCATCACAGACGA	485	453	105	347.667
AAAGAACTTGCAACCCACAG	495	403	507	468.333
AAAGAACTTTAGATTCCCCC	355	27	50	144
AAAGAAGAAATAGACGACCT	66	81	224	123.667
AAAGAAGAAGCAGTTTGAAG	274	934	1206	804.667
AAAGAAGAATACAAATCCCC	66	289	16	123.667
AAAGAAGAATTTACGTCGGG	182	188	332	234
AAAGAAGAGACATTTAGACC	476	514	367	452.333
AAAGAAGATTAATTCCTGGA	142	276	223	213.667
AAAGAAGATTTCCGTGGTGC	850	406	8829	3361.67
AAAGAAGCCAAACCCGATTG	497	162	59	239.333
AAAGAAGCCCTCATTGACCA	610	51	756	472.333
AAAGAAGCCTTCATTGACCA	312	317	536	388.333
AAAGAAGGAAAGTAAAAAGG	214	13	11	79.3333
AAAGAAGGAAGCGTCGCCAG	205	432	224	287
AAAGAAGTATTCTCGTGCCG	385	634	313	444
AAAGAAGTATTGCATCTCAT	701	238	6394	2444.33
AAAGAAGTCCCAGGAAATCG	224	121	267	204
AAAGAAGTGCCACACAATGG	1243	783	913	979.667
AAAGAAGTGGACGACGTGCT	26	370	101	165.667
AAAGAAGTTCAGTAGCAATG	75	371	136	194
AAAGAAGTTTGATTACATCG	132	66	833	343.667
AAAGAAGTTTGGTCACATTG	718	313	266	432.333
AAAGAATAAGGCTTGCAGTG	642	341	214	399
AAAGAATAATACGCTTCAGA	4	57	51	37.3333
AAAGAATGCAAAATGCGTAG	205	1581	40	608.667
AAAGAATGTTATGAATCTCC	288	47	7	114
AAAGAATTCAATTCTAGACG	1884	849	1990	1574.33
AAAGAATTCCAACAGTTGTG	460	139	2348	982.333
AAAGAATTGCACGATACTGA	2576	166	65	935.667
AAAGACAAAGTACGGCTGGT	885	226	505	538.667
AAAGACAAAGTGTCCTCTGA	1092	948	193	744.333
AAAGACAACAAATTTCTCTG	241	24	153	139.333
AAAGACAACCGGTGACCCTG	261	390	793	481.333
AAAGACAACCTACATCAGGT	60	122	51	77.6667
AAAGACAACTCTTGACCCTG	840	349	216	468.333
AAAGACAACTGTTGTCCCAG	420	685	439	514.667
AAAGACAAGAACATGCCATG	312	485	744	513.667
AAAGACAAGAGGGCTACCAG	186	178	637	333.667
AAAGACACCAGCCAAAGAGG	127	451	145	241
AAAGACACTCAAGAGACAGG	15	79	136	76.6667
AAAGACACTTAAGAAACAGG	21	30	49	33.3333
AAAGACACTTCATCCCACCA	407	1053	1495	985
AAAGACAGGAAGTTCTCCTC	98	292	873	421
AAAGACAGGCTAAAATAGAG	4	12	34	16.6667
AAAGACAGTAAAGGCATCCG	591	252	301	381.333
AAAGACAGTCAATCGCCACT	1093	321	858	757.333
AAAGACAGTGAGCAACTCTA	510	41	523	358
AAAGACATCCTACGACCCTG	521	233	994	582.667
AAAGACATGCTTCCCCACGT	494	419	337	416.667
AAAGACCATCAAAATTGGAT	30	185	65	93.3333
AAAGACCCACATCTTGACGG	343	1947	430	906.667
AAAGACCCAGAATGGACATG	79	114	43	78.6667
AAAGACCCGACCTAGATTCG	599	416	378	464.333
AAAGACCGTGAACTTACGCT	128	209	187	174.667
AAAGACGACGTCAAGACCTG	100	378	756	411.333
AAAGACGCCATGGAGCAAGG	212	937	156	435
AAAGACGTGCATTCAGCGAG	348	568	92	336
AAAGACTAAAGGATCGGGCA	21	386	142	183
AAAGACTACAAGAAAACCAT	71	85	3	53
AAAGACTCGTGAATTTCTAC	53	22	305	126.667
AAAGACTGACCCATTGACCG	389	1013	131	511
AAAGACTGCACCTCTTGGCA	208	205	355	256
AAAGACTGCCAATGGCCTAG	94	214	240	182.667
AAAGACTGTGATATCATGGA	662	196	245	367.667
AAAGAGAAACACTGAACACT	970	157	824	650.333
AAAGAGAAAGCTGCATACTG	446	659	149	418
AAAGAGAACAGCCTCCACTC	546	433	621	533.333
AAAGAGAATGTATATACACC	666	411	2305	1127.33
AAAGAGACAGAGTGACATAA	91	155	113	119.667
AAAGAGATCAACAGTTACTG	456	754	859	689.667
AAAGAGATCGAAAGGATGGT	332	91	120	181
AAAGAGCAATGAGGTACTGT	351	386	405	380.667
AAAGAGCCGGCCAGTCACGG	920	331	242	497.667
AAAGAGCTTCAAAAAAATCC	3	54	1024	360.333
AAAGAGCTTGTAAGAAACGA	16	14	11	13.6667
AAAGAGGAAACAGTTTGAAG	165	18	120	101
AAAGAGGAAGCTGTATAATG	1213	216	289	572.667
AAAGAGGAAGTAGCGAACAG	102	80	831	337.667
AAAGAGGAGTCCACTGACCC	502	462	475	479.667
AAAGAGGATGCTCCCGAGCA	468	520	220	402.667
AAAGAGGCTGACCCAGAATG	53	38	547	212.667
AAAGAGGTACTGTGATTCTG	716	546	62	441.333
AAAGAGGTCGTAGCAAACGT	58	172	82	104
AAAGAGGTGACCATCAAATG	126	490	1609	741.667
AAAGAGTAAAATGTGTGAAG	108	1254	53	471.667
AAAGAGTATTTGCAACATGT	81	887	396	454.667
AAAGAGTCAGTAGCAATCAA	950	166	283	466.333
AAAGAGTGACGACGGAACAC	20	35	26	27
AAAGAGTGTAGACCCTGCAC	261	141	89	163.667
AAAGATAACTCTCCGGAGTG	816	399	411	542
AAAGATAACTGTTGACCCTG	21	23	60	34.6667
AAAGATACAGATAAACAACT	64	329	14	135.667
AAAGATACATTTGACCAACT	1469	16	56	513.667
AAAGATACGAGTAGACATCA	175	2774	225	1058
AAAGATACTCACGGCTACTT	238	474	74	262
AAAGATATAAAGGAACTCGG	11	9	10	10
AAAGATCAAACTGCACAATG	21	83	232	112
AAAGATCAACCTCACCTACA	289	2464	124	959
AAAGATCAACTCATAAAACA	274	17	56	115.667
AAAGATCACAGAAAGACAAG	38	138	105	93.6667
AAAGATCACAGAAAGACAGG	217	20	311	182.667
AAAGATCAGCTCACCTCTGG	185	511	542	412.667
AAAGATCAGCTCAGCTCTGG	473	312	2345	1043.33
AAAGATCCATCAATACTTTG	594	49	185	276
AAAGATCGTAATTTATGACG	280	152	202	211.333
AAAGATCTCGAAGTCCGATG	239	459	252	316.667
AAAGATCTTACATATGATGT	525	561	381	489
AAAGATGACAGTAACAATGG	227	232	568	342.333
AAAGATGACATCAGGCACAA	424	76	640	380
AAAGATGAGAATTAACCAGG	368	157	326	283.667
AAAGATGATCAAGGAGACAA	307	92	203	200.667
AAAGATGATCGACCTCATGC	419	632	123	391.333
AAAGATGCCAGGTAGAGTTG	293	648	421	454
AAAGATGCTCAAATCCCTCG	110	272	1347	576.333
AAAGATGGAAATGATGACAA	220	304	435	319.667
AAAGATGTAGAGATTACCAC	203	108	32	114.333
AAAGATGTGACCCGAGCTAG	170	642	933	581.667
AAAGATGTGGATGTTACCCA	916	341	3456	1571
AAAGATTAAAGGCCTTACAG	414	160	222	265.333
AAAGATTAACACCTTCAACT	41	13	10	21.3333
AAAGATTAGCTCAGCTCTGG	1175	1721	1070	1322
AAAGATTCCCATTACAATCT	95	81	489	221.667
AAAGATTCGAGAGTTGCCTC	338	659	113	370
AAAGATTGGAAACCAACTGT	72	232	38	114
AAAGATTTGGCACAGAAGAA	2186	272	1421	1293
AAAGCAAAATGAGGAAAATG	314	73	22	136.333
AAAGCAAAGAAACCAAGACA	69	96	357	174
AAAGCAAAGAAGTATAACCC	4	2	46	17.3333
AAAGCAACACCCAAATGGCA	399	354	245	332.667
AAAGCAACCCCAGTTGACTG	256	508	353	372.333
AAAGCAAGAAAACCTAACCA	235	395	211	280.333
AAAGCAAGAGTGCATTCTGC	210	438	225	291
AAAGCAAGGATGCCCTGCGA	172	168	446	262
AAAGCAATATGTGTTCATGA	331	81	373	261.667
AAAGCAATGATGTTACCACC	24	39	24	29
AAAGCACCTAAATCTGCATG	36	98	213	115.667
AAAGCACCTTAGGACTTCCG	311	166	602	359.667
AAAGCACGATTCGATCATAG	310	435	196	313.667
AAAGCACGGCAGTGAAAGAA	7	20	356	127.667
AAAGCACTATATAATTGTAG	114	95	90	99.6667
AAAGCACTCGCAGATACAAG	295	66	47	136
AAAGCACTCTCTCTAAACGA	139	51	664	284.667
AAAGCACTGAAACGCTACGA	73	358	175	202
AAAGCACTGCCATCATGGCT	253	887	414	518
AAAGCAGAACCTCCTAAATG	405	891	538	611.333
AAAGCAGAAGAAATATAGCT	362	194	126	227.333
AAAGCAGCTCACTTTCAGGG	1396	262	587	748.333
AAAGCAGGCATGTCATGGGT	222	497	446	388.333
AAAGCAGGCTTCAAGTACTC	1478	399	416	764.333
AAAGCAGGGCCAATTAACCA	812	885	236	644.333
AAAGCAGTTTGTGTCTGACG	41	51	330	140.667
AAAGCATAACACTTATGAGA	17	70	39	42
AAAGCATAAGTCTTCCCACG	181	172	510	287.667
AAAGCATCACTGATGAAAGG	937	751	50	579.333
AAAGCATCAGAGAATTCATA	48	244	523	271.667
AAAGCATGAATTAACCAGAG	287	112	209	202.667
AAAGCATGATGTTATAACAG	153	166	354	224.333
AAAGCATGTCCACAGGACGT	215	535	1110	620
AAAGCATTGAGCGTTCTCAT	283	371	126	260
AAAGCCAAAATTGCAGATGG	1191	237	831	753
AAAGCCAACAAGTTAGACCA	39	165	12	72
AAAGCCAACATAATAGTAGG	241	272	303	272
AAAGCCAACATCATGAAACT	199	324	951	491.333
AAAGCCAAGACAGTCGAGCA	454	302	783	513
AAAGCCAAGAGCAGTTGGCT	190	50	62	100.667
AAAGCCAAGTCTTACAAGTG	2930	575	2605	2036.67
AAAGCCAATACGAATCCCAG	106	93	358	185.667
AAAGCCAATGATGAGTGCGA	813	537	1644	998
AAAGCCACAGCTCATCACCT	472	332	711	505
AAAGCCACATAAATGGCACT	508	786	525	606.333
AAAGCCACCCAGGACTCCAG	67	199	98	121.333
AAAGCCAGACTTACACCGTC	499	236	649	461.333
AAAGCCAGCTACCACAAACA	3085	188	114	1129
AAAGCCATCCATATGGCGGT	268	129	601	332.667
AAAGCCATCCTTCACTCGAG	478	706	1258	814
AAAGCCATGTTGGTGCAAAG	64	76	59	66.3333
AAAGCCATTCGAATGCCCTG	1131	395	309	611.667
AAAGCCATTTACAAAAGAGG	1	40	20	20.3333
AAAGCCCAAGACGGACCCAG	38	66	616	240
AAAGCCCACTGTATTTACAA	173	98	38	103
AAAGCCCCACATGTGTACCG	800	135	3928	1621
AAAGCCCCCAAAGCTCGGAT	752	249	306	435.667
AAAGCCCCCATAATGGAAAG	468	767	911	715.333
AAAGCCCCCATCGTATAATG	306	664	715	561.667
AAAGCCCCCCAGCCTAACGG	276	85	183	181.333
AAAGCCCCGAGAAACTAGAT	411	632	144	395.667
AAAGCCCGATGCAAATTCCA	30	19	11	20
AAAGCCGGACAAGTCTGGAG	112	506	809	475.667
AAAGCCGGAGGAAAAGCCCG	1292	146	204	547.333
AAAGCCGGCAGATTTCGGGA	585	417	260	420.667
AAAGCCGGGCGTGTCCACAA	860	283	302	481.667
AAAGCCGTAAATGTACTGTG	932	734	1278	981.333
AAAGCCGTATTGGTACCAGG	235	603	175	337.667
AAAGCCGTTACATTCCCACT	1412	372	688	824
AAAGCCGTTTCACTGTCCAT	2101	389	616	1035.33
AAAGCCTACTAGCATATTTG	462	505	757	574.667
AAAGCCTATAGGTACGACAG	1152	453	166	590.333
AAAGCCTATTCGGCCATTCG	889	241	428	519.333
AAAGCCTGCGTCGGTCAGAT	31	41	57	43
AAAGCCTTGAATCGCAACCT	982	429	412	607.667
AAAGCCTTTGGGTTTCAAAG	130	993	272	465
AAAGCGAATGTAGTGTTTGG	56	49	73	59.3333
AAAGCGACGATGTCTGGATG	141	748	221	370
AAAGCGATATGCCTCCAGAA	184	52	177	137.667
AAAGCGATCATGTCTCATCG	885	732	342	653
AAAGCGCACATAGATAACAT	383	189	323	298.333
AAAGCGCCCATCATCAACAT	722	875	1144	913.667
AAAGCGCGTGTCCCACCAAG	274	47	212	177.667
AAAGCGCTGCACTTCATCCG	218	226	146	196.667
AAAGCGCTGCAGGTTAGGGG	872	963	160	665
AAAGCGCTTCTGGACAACTG	6	15	71	30.6667
AAAGCGCTTTCGTATTCGGG	237	95	381	237.667
AAAGCGGATTATGGTGATCG	316	734	385	478.333
AAAGCGGTGTGCGTGCTGAA	22	68	48	46
AAAGCGTCCCAACAGTGCGA	410	156	475	347
AAAGCGTCGAAGAAACCTGT	40	46	40	42
AAAGCGTCTGTTCCGTGATG	399	130	731	420
AAAGCGTGGACACCGACTAA	83	59	49	63.6667
AAAGCGTTGGAGTTTGGACG	1140	308	823	757
AAAGCTACAGAAGCTCACTG	476	304	122	300.667
AAAGCTACCTTTATAGCCAT	362	717	837	638.667
AAAGCTACGAGTTGCCTGAT	978	237	700	638.333
AAAGCTACTTACTTCCACAG	97	244	763	368
AAAGCTAGCCTCTGGCAACG	425	1035	349	603
AAAGCTATATCCCAAAACCC	22	143	210	125
AAAGCTATGCTAAAGGACAG	13	29	18	20
AAAGCTCAAATTCAGCGATG	88	1302	123	504.333
AAAGCTCACCAGAGAATCCG	215	93	522	276.667
AAAGCTCACCTGTCAAACAG	113	686	801	533.333
AAAGCTCAGTATATGTGAGG	193	304	735	410.667
AAAGCTCCAATAATCCACAG	26	330	100	152
AAAGCTCCGGTGCATGCGTG	335	1845	428	869.333
AAAGCTCCTCAAGACCACAT	9	71	3	27.6667
AAAGCTCGCTGATATTAACA	201	1247	189	545.667
AAAGCTCTACTCAAGTACAC	297	21	175	164.333
AAAGCTCTCACATATTCTCG	13	17	6	12
AAAGCTGAACAGTTCTACTG	375	154	110	213
AAAGCTGAACGAATTGCTTG	133	212	633	326
AAAGCTGACACTCTCCATTG	641	267	536	481.333
AAAGCTGATAACGAATCATG	530	226	794	516.667
AAAGCTGCAGTCTCTTAGCC	448	481	526	485
AAAGCTGCCTACCAACACAA	149	77	20	82
AAAGCTGGATGGTACACCCA	396	104	718	406
AAAGCTGTCAAAAAATCTAT	10	16	5	10.3333
AAAGCTGTCGTCTTTATCAA	140	796	57	331
AAAGCTTACCTGTTCTGTAG	121	51	97	89.6667
AAAGCTTCAGAACATCCAGT	179	79	72	110
AAAGCTTCCCAGGTAATGTG	817	1107	141	688.333
AAAGCTTGATAATCTGCCCA	57	105	38	66.6667
AAAGCTTGTACCGTAGCTGA	206	125	249	193.333
AAAGCTTTATAGTGCCCCAA	922	127	344	464.333
AAAGGAAAAACTGAAGATGG	50	667	230	315.667
AAAGGAAAAACTGTAACCCA	536	515	75	375.333
AAAGGAAAAATGCCACTGTG	409	1280	643	777.333
AAAGGAAAACATTGAAACAG	12	192	50	84.6667
AAAGGAAAACCATAATCGAG	57	333	324	238
AAAGGAAACAAAGTCAATGT	301	320	19	213.333
AAAGGAAACCACAAAAACGG	137	109	31	92.3333
AAAGGAAAGAAAAAATCTGT	199	192	22	137.667
AAAGGAAATGAATCATCCGG	288	170	149	202.333
AAAGGAAGACACGTCGTACG	14	63	14	30.3333
AAAGGAAGGCATTGAATACA	1040	320	382	580.667
AAAGGAATTGTACCCAGTGC	18	15	7	13.3333
AAAGGACAAGATATCCAAGT	1103	1382	257	914
AAAGGACAAGTTGAAGATGG	448	757	471	558.667
AAAGGACACAGACTGGTACC	465	457	345	422.333
AAAGGACAGAAAGGCACTGT	395	381	197	324.333
AAAGGACCAGAATCTGACTA	166	248	385	266.333
AAAGGACCAGATAATTCCAT	407	1180	158	581.667
AAAGGACCTAAGCTTACCGT	30	357	114	167
AAAGGACGACCACACAATCG	33	216	223	157.333
AAAGGAGAAACAGATTGGCT	833	675	754	754
AAAGGAGAAACATATTTGGT	120	178	290	196
AAAGGAGAAAGTGCGCAGTG	62	1819	201	694
AAAGGAGAACACGTTGTCGT	640	1225	5475	2446.67
AAAGGAGAAGCCAAATTCTG	101	238	520	286.333
AAAGGAGAATCCAATAAATG	373	185	337	298.333
AAAGGAGATTAGGTTTACTG	185	973	530	562.667
AAAGGAGATTCTACACTGCA	62	90	819	323.667
AAAGGAGCAAGAAGTCGGCT	77	277	65	139.667
AAAGGAGCACAGTTTACAAG	99	178	251	176
AAAGGAGCATGACTTCACAC	140	70	71	93.6667
AAAGGAGCCTATCCCACGAG	771	185	595	517
AAAGGAGCTGCTATTCGTGG	278	1214	1127	873
AAAGGAGGAGACAAATCCTG	707	113	87	302.333
AAAGGAGTCTACCAATTCAA	182	7	10	66.3333
AAAGGATAAAAAGAGTGAGA	3	90	191	94.6667
AAAGGATACTGATCTGTCTG	568	881	733	727.333
AAAGGATATGGAAACTCCAG	65	192	475	244
AAAGGATCGTGAAAAAGACA	49	214	187	150
AAAGGATCTGAATAGTTGCA	381	776	1362	839.667
AAAGGATGCACATCACAGGA	547	291	527	455
AAAGGATGTGACCAGACCTA	199	803	193	398.333
AAAGGATTATCCATTCCAGG	126	160	208	164.667
AAAGGATTTACAGACGCGAG	168	658	296	374
AAAGGATTTATCAATGACTT	139	210	581	310
AAAGGCAAACCGGTTCACGG	383	297	176	285.333
AAAGGCAAAGAAATAGAACT	159	255	64	159.333
AAAGGCAAAGGCGAAGAAGA	442	92	87	207
AAAGGCAATGTAGAAGAGTG	718	488	323	509.667
AAAGGCACAACACAGTTCAG	419	484	717	540
AAAGGCAGCTTCAGGCACCA	126	112	162	133.333
AAAGGCAGGAGTCATATACT	1154	184	78	472
AAAGGCATCCAATCCTGTGG	295	698	419	470.667
AAAGGCATTATCTCACCGGT	345	101	2740	1062
AAAGGCATTCCTCCCTAAAG	81	801	403	428.333
AAAGGCCAAGAGTCACAGAA	381	462	98	313.667
AAAGGCCAATGCAATTGCAT	624	363	614	533.667
AAAGGCCAGAATGAAGTCGG	28	22	9	19.6667
AAAGGCCAGGCACAGGATCA	187	532	2125	948
AAAGGCCATTAATTACTACG	47	24	90	53.6667
AAAGGCCATTATGAAGTCGT	973	785	1502	1086.67
AAAGGCCATTGCAACAAGTA	932	1317	1715	1321.33
AAAGGCCGCGCTCACTCTAG	750	64	190	334.667
AAAGGCCTTTAACCCTACCG	32	93	88	71
AAAGGCCTTTGAATTGTCTG	787	978	111	625.333
AAAGGCGATCTTAAAGGACG	299	297	2057	884.333
AAAGGCGGCCATAGTCTGCA	476	506	1363	781.667
AAAGGCTACAAACATGCGGT	443	1209	465	705.667
AAAGGCTATAGAGCCGCAAG	388	476	850	571.333
AAAGGCTCTAAAGAAACACA	231	21	1089	447
AAAGGCTCTAAAGGCTGCAT	331	492	173	332
AAAGGCTCTTCACTCCTCTG	411	972	252	545
AAAGGCTGCCCAATGAAGCG	582	476	573	543.667
AAAGGCTGCTGTTGAAAGGA	175	1495	1037	902.333
AAAGGCTTTGAACCAAGTTG	151	3184	387	1240.67
AAAGGGAACATTTATCCCTG	1426	234	924	861.333
AAAGGGAAGAATTAGAGCCG	313	403	147	287.667
AAAGGGACAGAAATGGACAC	1073	710	1111	964.667
AAAGGGATTCAGTTTGCACA	944	200	270	471.333
AAAGGGCATCCTTCCCCCGA	156	284	186	208.667
AAAGGGCATTCAGTTACTAT	42	46	13	33.6667
AAAGGGCCAAAGCTTTAAAG	890	101	1269	753.333
AAAGGGCCAGAAAAGCAGGT	1024	133	655	604
AAAGGGCCCTCAGTTTCAAG	388	283	1148	606.333
AAAGGGCGGTATGCCCCAGC	196	184	237	205.667
AAAGGGCTGAGATCCATGGT	4147	864	437	1816
AAAGGGGAAATTATCTCACT	236	237	681	384.667
AAAGGGGACGAAGACGACAA	318	136	80	178
AAAGGGGCAAATCCAAGAGT	405	220	1495	706.667
AAAGGGGTAAACTCGAGCCA	81	540	61	227.333
AAAGGGGTCGTAAACGCAGG	23	324	393	246.667
AAAGGGTAGATAAAGAGCTG	290	443	658	463.667
AAAGGGTCGTAGGTTCCGAT	1090	198	217	501.667
AAAGGGTGAACAGATCGCTA	465	448	160	357.667
AAAGGTAAGATGCCAATCCA	313	705	696	571.333
AAAGGTACGGAGCTGTCTGG	511	1633	340	828
AAAGGTACTGTTCTAGGCCG	1318	280	638	745.333
AAAGGTCAATCTTCGTGCTG	53	307	271	210.333
AAAGGTCAGAGACCTCACAG	2993	82	109	1061.33
AAAGGTCCGTTACTTTGGGA	121	703	222	348.667
AAAGGTCGCTGCCATTCTAG	438	668	1659	921.667
AAAGGTCGTCAAACAGACTC	134	215	40	129.667
AAAGGTGCGGAAGAACAGGT	130	709	222	353.667
AAAGGTGCGGTAGTGGTCCA	215	94	398	235.667
AAAGGTGCTTACCGTATGTG	60	194	216	156.667
AAAGGTGGACCTGATGACAG	311	1437	671	806.333
AAAGGTGGCAATGAGAGCCT	91	235	252	192.667
AAAGGTGTACAGCTCCCCGT	58	182	190	143.333
AAAGGTTCCTGAATGCCGGT	1254	677	1208	1046.33
AAAGGTTCTCTTCTTATGTG	282	234	272	262.667
AAAGGTTGAACAGTCCGATG	243	1045	305	531
AAAGGTTGTACCTTTCATTG	1202	563	992	919
AAAGGTTTATACCCGCCACG	551	1253	679	827.667
AAAGGTTTGGATAAATACCT	728	167	70	321.667
AAAGTAAAACAGCTCCACGT	230	111	260	200.333
AAAGTAAAATAGACATAAAG	15	38	12	21.6667
AAAGTAAACCAGCTTAACCA	13	400	32	148.333
AAAGTAAACTGTGACGATGA	782	548	446	592
AAAGTAAATATTCTGGTACC	188	120	101	136.333
AAAGTAAATTTACCTCAACA	10	70	22	34
AAAGTAACTAGTGTTGACAG	607	228	236	357
AAAGTAAGTAACCTGATACT	141	511	201	284.333
AAAGTAATCCCACACCACAT	424	1705	156	761.667
AAAGTACAGAATCCAGTTCG	405	351	859	538.333
AAAGTACCCCAATTGTACTC	224	108	88	140
AAAGTACCTTCAGTACATCA	10	226	265	167
AAAGTACTCAGGCATTACCT	396	170	675	413.667
AAAGTACTCTTACAAGACTG	150	153	49	117.333
AAAGTACTGACCTGTAGGAT	89	397	173	219.667
AAAGTAGAGCCGGGATCAGG	111	92	91	98
AAAGTAGCTCAGCTCTACCT	681	1680	264	875
AAAGTATAACACCTTTGGAG	123	200	11	111.333
AAAGTATATCCATTTCAGAG	1112	91	140	447.667
AAAGTATCCAGAATCCCTCA	165	113	677	318.333
AAAGTATCCAGCAAAGACAA	9	2	3	4.66667
AAAGTATTCCGAGTCCGTGA	443	128	91	220.667
AAAGTATTTCCACTTCATTG	31	17	12	20
AAAGTCAACTACCATTTGTG	238	171	292	233.667
AAAGTCAAGTGAGCAGAGCT	63	75	502	213.333
AAAGTCAATAAAAGCCAGGT	241	640	252	377.667
AAAGTCACAAGTCCAAGCAA	80	17	471	189.333
AAAGTCACTGGAATTGTCTG	799	1283	461	847.667
AAAGTCAGGAACAATAATGC	91	127	135	117.667
AAAGTCATGACCGATGAAGG	37	64	443	181.333
AAAGTCATGCGTGACACCAA	420	1269	84	591
AAAGTCATGTGACTATGATG	120	254	53	142.333
AAAGTCATTCCTCAATACTC	90	39	34	54.3333
AAAGTCCAATGTAAACAAGC	230	29	84	114.333
AAAGTCCACACTCCGAACTG	557	95	264	305.333
AAAGTCCAGATATTTGAGCA	1553	352	347	750.667
AAAGTCCCAACCAGTACGAA	256	89	242	195.667
AAAGTCCCTACGAAGTCACA	406	362	310	359.333
AAAGTCCCTCGGCCCGACAC	1118	410	863	797
AAAGTCCGGAAGTAGGCGGG	850	490	584	641.333
AAAGTCCTAAGCCTTACATG	200	1468	791	819.667
AAAGTCGATAATGACAATTG	1701	53	92	615.333
AAAGTCGATCTCATACACGT	571	66	188	275
AAAGTCGCAGCAGTAGAGAA	353	163	429	315
AAAGTCGCCCCTGACACTTG	267	237	432	312
AAAGTCGGATGAATCGGGGG	71	103	324	166
AAAGTCGGGCAAATGCCCCG	567	314	604	495
AAAGTCGGGCCGCCTCTGTG	522	1599	367	829.333
AAAGTCGGTGTAATACACAT	179	338	412	309.667
AAAGTCTAAATCTCAAGGTG	290	141	1057	496
AAAGTCTACCCGTCCTGCCG	455	1406	737	866
AAAGTCTACTAGCTCAGCTG	634	457	1427	839.333
AAAGTCTCTTCGCTGACTGG	608	97	925	543.333
AAAGTCTGAAACATAGAGTA	622	415	285	440.667
AAAGTCTGTCCCTGTGATCG	9	20	34	21
AAAGTGAACGAGAAACCTCT	655	54	24	244.333
AAAGTGAAGAAAGAATACCT	181	227	157	188.333
AAAGTGACGAGGACATAACT	186	108	48	114
AAAGTGACGATGCCTACAGG	79	123	555	252.333
AAAGTGACTGATTTGACACA	303	636	287	408.667
AAAGTGATAAAATTGGAACC	40	295	144	159.667
AAAGTGATACATCAATACAC	80	53	57	63.3333
AAAGTGATAGAAATCCACGA	179	205	1709	697.667
AAAGTGATCATGATCAACGG	558	127	18	234.333
AAAGTGCAAACATCCGATGT	3200	150	41	1130.33
AAAGTGCACTTCCGACCCAA	98	401	86	195
AAAGTGCAGTTCTTGAACGT	3041	517	983	1513.67
AAAGTGCATACTCACAACTG	982	97	107	395.333
AAAGTGCCAATCCCTTGGAA	519	356	226	367
AAAGTGCCAGAGCAAACCTT	3924	340	166	1476.67
AAAGTGCCAGCTCGAACACA	1034	237	423	564.667
AAAGTGCCAGGACCTGATAG	212	368	5938	2172.67
AAAGTGCCCCAAGATATGGC	512	236	160	302.667
AAAGTGCCTGACCATCATGT	483	1143	777	801
AAAGTGCGAGTCATAGATGC	535	200	237	324
AAAGTGCGGCATGCTCAGAG	1122	536	376	678
AAAGTGCTCAATGGACCTCA	209	246	658	371
AAAGTGGAGAAACTCACAGG	57	49	181	95.6667
AAAGTGGATTCTGCTCATTG	170	392	299	287
AAAGTGGCAAAGCCATTCAA	676	166	968	603.333
AAAGTGGCAGTTTGACAGGG	301	161	684	382
AAAGTGGCATCGAAGCACAG	1582	184	187	651
AAAGTGGGAGGTGAAAACGA	48	726	182	318.667
AAAGTGGTGAACTGACTGCG	402	748	616	588.667
AAAGTGGTGATCAGTATCCG	594	341	354	429.667
AAAGTGGTTCTGGAAAAGGA	40	487	15	180.667
AAAGTGTAAAGATGCCGGAC	607	93	261	320.333
AAAGTGTATGAAGAACATCT	38	89	140	89
AAAGTGTATGGTCGTGACAA	67	127	725	306.333
AAAGTGTCAGATCCAGACTG	244	160	360	254.667
AAAGTGTCGGAACTGCCCCG	381	177	191	249.667
AAAGTGTGGGTCAGCAACAG	366	154	339	286.333
AAAGTGTGTGAAACCTAACG	13	164	16	64.3333
AAAGTTAAAAATAACCACCT	130	574	77	260.333
AAAGTTACAAGAATTTCACA	58	331	77	155.333
AAAGTTACAGATATGGGACA	163	146	452	253.667
AAAGTTATGATGGGACCCTG	3481	469	191	1380.33
AAAGTTATGGATTATGTACC	428	182	328	312.667
AAAGTTATGTCACCATACAA	14	1605	188	602.333
AAAGTTATGTTGGGTACTAG	300	157	108	188.333
AAAGTTCACACTATGTTGCG	38	278	125	147
AAAGTTCCAGACAGAATTAG	1230	1265	152	882.333
AAAGTTCCAGATCGCAACCT	344	463	595	467.333
AAAGTTCCAGCGTAGCTTAG	55	195	124	124.667
AAAGTTCCCTACAAGCCCAA	19	488	167	224.667
AAAGTTCCTGTACTCAAAGA	506	64	127	232.333
AAAGTTGCGGCTGTGTACGG	235	922	742	633
AAAGTTGGCGTGCGAACCAG	24	30	6	20
AAAGTTGTATCATGCAGCCA	252	137	400	263
AAAGTTGTCTTGACTCACAC	183	108	81	124
AAAGTTGTTACATCGTGTTG	99	714	567	460
AAAGTTTCCACTCCGCGCCC	741	768	148	552.333
AAAGTTTGACCAGTGTGTGC	366	202	121	229.667
AAATAAAAATACTCCCCCAT	117	444	219	260
AAATAAAACTGGATGTACAC	235	31	10	92
AAATAAACAGAGTTACATAG	44	187	24	85
AAATAAACATATCACGCACA	84	106	126	105.333
AAATAAACTGCACCAAAAGG	10	8	16	11.3333
AAATAAACTGGAGTCAACAG	286	28	375	229.667
AAATAAAGAACCGCACTGTG	841	258	198	432.333
AAATAAAGACGACAGACCGG	48	535	319	300.667
AAATAAATGACTTTATAGCA	191	26	157	124.667
AAATAACACAATCACGTCAG	1020	145	168	444.333
AAATAACCATTCAGAACCTG	193	110	484	262.333
AAATAACCTCCATAGATACC	1028	45	291	454.667
AAATAACGAGGAATATCAGG	110	222	255	195.667
AAATAACTGCTTCCTGTACG	467	723	4829	2006.33
AAATAACTTGCATCACACAA	6	723	70	266.333
AAATAAGATCACAGAAACAA	305	61	14	126.667
AAATAAGGATAAGTGTGTGA	241	1194	678	704.333
AAATAAGGCATGCAGTCCCA	762	186	135	361
AAATAAGGCCATGTCCAGTG	656	736	905	765.667
AAATAAGGCTGCCATAGTGT	237	444	1285	655.333
AAATAATCAAGTAGTAGGAA	79	209	77	121.667
AAATAATCAATAAAGTCACG	23	50	169	80.6667
AAATAATCACTGGAGCTCGT	318	172	297	262.333
AAATAATCCATAAACTGCTG	58	415	112	195
AAATAATCGTGCTCAGGCAT	447	122	621	396.667
AAATAATCTCCCAATCATGG	649	95	78	274
AAATACAACACACTCCAGAT	44	219	73	112
AAATACAAGTACTCACGCGT	228	387	225	280
AAATACACATTATACCTGGT	1025	91	146	420.667
AAATACACCAACCGAACAGT	76	252	162	163.333
AAATACAGAGTAACCACCAT	75	74	51	66.6667
AAATACAGTTAGATAGACAT	102	214	1108	474.667
AAATACATCTTATAATTTAG	13	25	1305	447.667
AAATACATTACGATCTAGTC	777	311	488	525.333
AAATACCACAGAGTAGACAG	86	1493	311	630
AAATACCAGCTAAGACTCAA	54	92	34	60
AAATACCAGTGCTATCGATG	926	624	1630	1060
AAATACCCGATAGAGCCTGC	275	240	791	435.333
AAATACCCTAAGAAGTCTCG	82	136	41	86.3333
AAATACCTATAGTTGAAGGG	3497	322	37	1285.33
AAATACCTGAATGTCCTACG	44	135	397	192
AAATACCTGCAATATCAACA	127	20	255	134
AAATACCTGTCCACAATTGG	786	1103	1136	1008.33
AAATACCTTCATCCCGAGCG	331	193	935	486.333
AAATACCTTGAGAGTAGACG	829	188	1247	754.667
AAATACGTATGCCTCCCATA	587	6033	534	2384.67
AAATACGTGAATATTGAGTG	537	743	761	680.333
AAATACGTGGCGAATATGCA	1489	335	537	787
AAATACTCAACATTCCATCC	101	25	23	49.6667
AAATACTCAAGGTTGTACTG	2942	134	391	1155.67
AAATACTTCTGTCTCCGGAG	2378	1347	192	1305.67
AAATACTTGCAAACCAACGA	621	156	41	272.667
AAATAGAAAGACATTGGCCA	623	79	232	311.333
AAATAGAACCCGATCTAGGG	773	59	71	301
AAATAGACGTTCCAGCCGCT	392	540	302	411.333
AAATAGCAACTCTGACCCGA	403	331	604	446
AAATAGCAGTAGGAACGACG	581	36	42	219.667
AAATAGCTTTGCTTGTGGAG	1406	588	591	861.667
AAATAGGAAAAAGTACACCT	412	67	234	237.667
AAATAGGAAGGCCTTCACTG	78	844	129	350.333
AAATAGGGCACCATGTGCGG	707	316	666	563
AAATAGTAGTGCCCGCAGTG	200	225	862	429
AAATAGTCAATGTAGATGTG	95	232	528	285
AAATAGTCGAGCACTGACGT	18	17	159	64.6667
AAATAGTGGGAGAGTCACGG	224	698	481	467.667
AAATATAAAGCTTTCACCCA	369	279	372	340
AAATATAACTCAGGACCCCG	378	475	501	451.333
AAATATACTTCCGTCTGTGT	3814	151	104	1356.33
AAATATAGAAACAGTGACAA	92	221	53	122
AAATATAGGCCAACTCCCGG	156	25	159	113.333
AAATATATCGGATATGAGAG	41	147	10	66
AAATATCAAACAAGTAAACT	188	36	47	90.3333
AAATATCAACAGCTGCAGAA	34	489	7	176.667
AAATATCCAAGGCATACTGG	827	83	158	356
AAATATCCCAGAGAACAGCC	333	164	115	204
AAATATCCTGGATTTCAGTG	248	479	84	270.333
AAATATCGCCCGGGTATCAG	1638	692	618	982.667
AAATATCGTGCTCAGACACG	187	475	541	401
AAATATGAACATAGAATGAA	689	358	63	370
AAATATGAATCAACATCCAG	17	80	29	42
AAATATGACAACAAGTCCTG	10	10	17	12.3333
AAATATGACATTCGACAAGT	192	510	309	337
AAATATGACGCCATTTACAG	194	110	82	128.667
AAATATGTCGTGAGATTCTG	265	100	593	319.333
AAATATTAGATATGGAGCAG	379	38	135	184
AAATATTAGGTAATAGATGG	513	369	340	407.333
AAATATTATCTCCCCTATGG	54	91	78	74.3333
AAATATTATGTGGATCCTTG	304	90	292	228.667
AAATATTCCAGCTATAAACC	18	162	39	73
AAATATTCTCTTGAACATGG	48	61	113	74
AAATATTGAACAAACCTCAG	28	8	218	84.6667
AAATATTGATGGCAGAACAC	325	423	130	292.667
AAATATTGGACACCTTCATA	258	190	638	362
AAATATTGGGACATATCCAG	348	579	189	372
AAATCAAGACTTCCCTACTG	646	588	53	429
AAATCAAGCAGAGGCGAAGT	2459	104	596	1053
AAATCAAGCTATACTATGAG	497	656	223	458.667
AAATCAAGGCCAATAATCAG	184	99	312	198.333
AAATCAATACCCATTGACCC	54	62	9	41.6667
AAATCAATGAGACTTACAAC	8	105	148	87
AAATCACGATACCTTCCGAG	8517	66	127	2903.33
AAATCACTGACACCAACGTG	28	21	15	21.3333
AAATCAGGATGAATGCATCG	83	467	107	219
AAATCAGTACAGAATCCAAG	24	76	70	56.6667
AAATCAGTGAACATCTTGAG	222	578	522	440.667
AAATCAGTGAGCAAGAAAGT	599	914	1216	909.667
AAATCATAGCTCTGAACCAG	989	344	727	686.667
AAATCATCACTAGAGAGAGG	771	115	184	356.667
AAATCATCCTGTGTTAGCCA	1143	297	2613	1351
AAATCATGAGCTATGTGACG	1477	580	298	785
AAATCATTAAATATGCGCAC	49	24	31	34.6667
AAATCATTCTGGGGAAGACA	22	58	9	29.6667
AAATCCAAACACTAACAGGT	136	118	145	133
AAATCCAAGCTACCATACTC	297	173	201	223.667
AAATCCAAGGTACACAGAGG	100	437	796	444.333
AAATCCAATGCATGTAGCTG	313	1259	546	706
AAATCCAGACTTCCTATCAA	36	65	42	47.6667
AAATCCAGATCCCAAATCAA	128	46	285	153
AAATCCAGATCCCGAATCAA	73	52	98	74.3333
AAATCCAGGCAAACCCAGCG	323	1576	242	713.667
AAATCCATCACTTTATGGCA	2118	1199	251	1189.33
AAATCCATCATCGAATGCAC	95	176	100	123.667
AAATCCATGGCCTATATGCG	176	613	392	393.667
AAATCCCAAAACACACAGCG	86	246	82	138
AAATCCGAACAGAGTCATTG	109	304	205	206
AAATCCGACAAGTTCCACAG	224	445	85	251.333
AAATCCGAGAGGAGGAACGT	563	138	348	349.667
AAATCCGATTTACTTCAGGT	4	11	404	139.667
AAATCCGCGGCATCTGCTGA	277	1137	716	710
AAATCCGGCGAAAAGCCGCG	486	1486	224	732
AAATCCGGTTCCCATCGTGT	267	372	237	292
AAATCCTAGAAAATTCAACT	209	68	103	126.667
AAATCCTGGTCATACATGGT	208	288	123	206.333
AAATCCTTAGCTGTCAGTCA	703	194	181	359.333
AAATCCTTTGCATGTCAGAG	846	216	789	617
AAATCCTTTGTATGTCAGAG	175	555	771	500.333
AAATCGACGAGCATAAATGA	176	730	164	356.667
AAATCGATGGTCATACCAGG	15	13	25	17.6667
AAATCGCATTCTGCTGTACG	89	28	69	62
AAATCGCCAAGAAGGTCAAG	168	62	364	198
AAATCGGAATGCTTCCGTCG	482	823	895	733.333
AAATCGGATGTCATAAGGCG	288	578	505	457
AAATCGGCGTTTGTCCGCTG	8	14	56	26
AAATCGGGTACCCTTTCTGG	270	351	382	334.333
AAATCTAACCGAACGGCAGG	480	378	329	395.667
AAATCTAATGGATGTCACAG	431	18	94	181
AAATCTACGGCGCCACAGCA	277	155	755	395.667
AAATCTACGTCTGAAACCAC	400	243	160	267.667
AAATCTACTTTGCGTACGAG	81	326	336	247.667
AAATCTAGGGACAGAAACAC	100	315	572	329
AAATCTAGGGATAGAAACAC	63	65	118	82
AAATCTAGGGATGGAAACAC	53	97	142	97.3333
AAATCTAGGGATTGAAACAC	354	391	227	324
AAATCTCAAGGAGCCAAGAG	132	77	201	136.667
AAATCTCACATATTCATAGG	56	72	141	89.6667
AAATCTCCAGAGATTATCAG	2	9	18	9.66667
AAATCTGCAACTTTACGACC	30	302	50	127.333
AAATCTGGCTCACAAGCGCA	621	370	896	629
AAATCTGTACAAACCAACAC	95	157	693	315
AAATCTGTCAAAACAGGACG	128	406	440	324.667
AAATCTGTGAGGCACAACCC	164	260	209	211
AAATCTGTTCAATGGAAGGG	26	629	34	229.667
AAATCTTCTGAAAAAGAGGA	20	33	252	101.667
AAATCTTTCACCCATTATAG	12	165	54	77
AAATCTTTCATCATAGTCGA	396	141	143	226.667
AAATGAAAACATCCTATGAT	127	115	227	156.333
AAATGAAAGAATTTGGTCTG	76	285	312	224.333
AAATGAAATTCTGGTAATGA	183	29	49	87
AAATGAAGAAAACAGCATGT	14	70	34	39.3333
AAATGACAAAAACATTCAAG	163	245	31	146.333
AAATGACAACGCAAGACTGA	193	229	348	256.667
AAATGACACATAGGTCAGGG	244	536	1016	598.667
AAATGACCACTTGTCCACAA	102	544	75	240.333
AAATGACCTGGAAATGGCCA	240	637	192	356.333
AAATGACGAGGAAGAATACG	17	29	10	18.6667
AAATGACTATCAACAGGCTG	735	237	322	431.333
AAATGACTCTAACCACAACA	50	132	16	66
AAATGAGAATCCCATTGTAG	723	430	197	450
AAATGAGATGTGGCGATCAG	102	46	25	57.6667
AAATGAGCCACAGATGGGGT	346	747	322	471.667
AAATGAGTCCGTCGTGTCCG	265	181	423	289.667
AAATGATAAGAAAATTTCCA	47	393	142	194
AAATGATACAGCTTCTAATG	184	199	233	205.333
AAATGATACGAGGATTATCG	578	197	127	300.667
AAATGATACTCTGACAAGAT	123	425	489	345.667
AAATGATATTGGATAGCCAG	230	215	1997	814
AAATGATCGTTTCAACTACG	568	40	351	319.667
AAATGATCTACAAGGCTAAG	63	173	13	83
AAATGATCTTGTTGTCAGAG	72	1927	327	775.333
AAATGATGGTTTATCTGGCA	305	226	1048	526.333
AAATGCAAGAAATGGTACCG	41	570	1528	713
AAATGCAAGTAAGGAGAGGA	466	275	92	277.667
AAATGCAAGTGGCTATCCAG	319	399	375	364.333
AAATGCAATACATGATATCC	313	378	55	248.667
AAATGCACAAGGGATTCACG	1785	652	420	952.333
AAATGCACACCAGCACACCA	141	102	277	173.333
AAATGCACCAGCACAAAAGT	73	104	186	121
AAATGCACGCTCCCCCATGT	477	995	273	581.667
AAATGCACTGAGTTCAAACA	583	290	103	325.333
AAATGCAGAAAAAGACCTGT	82	125	110	105.667
AAATGCAGAATCAGAAATGT	625	151	82	286
AAATGCATCAACCACTACGG	119	50	268	145.667
AAATGCATTAATAGATGGGT	410	218	250	292.667
AAATGCCAAGCCAATCAGGC	97	238	132	155.667
AAATGCCACGAACTCCCCAA	545	517	817	626.333
AAATGCCATCATTGGTCGTG	548	438	342	442.667
AAATGCCCCCATTTCCCGAG	243	437	175	285
AAATGCCGGGTAAATAACGG	510	680	288	492.667
AAATGCCGTCCTCTATCCGT	175	785	1092	684
AAATGCGTCCTTGACAATCG	254	1064	648	655.333
AAATGCTAGGCAATCCACTG	528	186	661	458.333
AAATGCTCAGTCGGGTCAAG	2863	1180	657	1566.67
AAATGCTGAATATAATCCCA	3	8	7	6
AAATGCTTAAACCCCCAACA	120	127	194	147
AAATGGAGCATTCCTAGCAG	96	267	102	155
AAATGGATATTACAGGATAG	79	364	151	198
AAATGGATCTATGTACACCA	644	191	56	297
AAATGGATGATGATGAAGTG	193	233	720	382
AAATGGCACTGATGAAACAT	129	316	98	181
AAATGGCAGAAGAAGAGGCG	79	45	21	48.3333
AAATGGCGACGAATGTACAT	243	252	438	311
AAATGGCTATTACCGAGCCA	87	759	1328	724.667
AAATGGCTGTTGATCCCATG	54	107	70	77
AAATGGCTTTGAACTACCAA	134	30	28	64
AAATGGGAGCCAATGAACAT	379	1029	372	593.333
AAATGGGATAACATTGCCGG	99	279	363	247
AAATGGGCGGGAGGTTCGAA	98	191	680	323
AAATGGGGAACGATCCCTCG	800	270	2853	1307.67
AAATGGGTCGACTTTGCCAG	403	541	646	530
AAATGGGTTTGCTCCACCAC	499	224	91	271.333
AAATGGTAGACAAAATCCTA	177	199	3294	1223.33
AAATGGTAGACGTGGCACTG	160	537	1273	656.667
AAATGGTAGCGAGACAACTG	1168	133	149	483.333
AAATGGTCCACAAACCAAGT	138	34	440	204
AAATGGTCCATAGTCGCACA	632	193	239	354.667
AAATGGTGCCATATCTAAGA	108	94	175	125.667
AAATGGTGGCGTTTGCAGGG	614	474	492	526.667
AAATGTAAACTATCTTGACC	539	102	139	260
AAATGTACATGGGTATGTGG	132	642	218	330.667
AAATGTACCACTGGATCAGG	468	1030	143	547
AAATGTACGCCAGCAACGAC	211	416	301	309.333
AAATGTACTGTGATGTTCCA	1153	309	932	798
AAATGTACTTCAAGACCAGA	141	282	64	162.333
AAATGTACTTGGGTCTGTCG	638	2880	803	1440.33
AAATGTAGTGATCCTTGGAG	472	944	742	719.333
AAATGTATCCAGGCGATCAG	136	152	225	171
AAATGTATGACTATCAAGGC	47	66	7	40
AAATGTCAAAGATGCGATCG	1208	382	1480	1023.33
AAATGTCACGTTTGCTCAGG	841	838	472	717
AAATGTCAGTTCTGATGGAA	74	1578	947	866.333
AAATGTCATAATCTGCACAC	128	28	240	132
AAATGTCATTAGCGCCCTGG	257	815	384	485.333
AAATGTCTGCATTATACATG	399	1251	1090	913.333
AAATGTCTGCTACCAGTACG	122	102	571	265
AAATGTCTTGAAGACACGAC	32	30	11	24.3333
AAATGTGACCAGGTATGGCT	492	644	979	705
AAATGTGACCCAACTAATGC	151	59	48	86
AAATGTGAGAAAGACCACAA	344	772	507	541
AAATGTGATCAGGTGTGGCT	830	598	573	667
AAATGTGCTAGTGCAACCAG	371	190	309	290
AAATGTGGGAATACAATACA	66	782	36	294.667
AAATGTTAATGACTACCGGG	1368	159	323	616.667
AAATGTTACTGCATTTCCCG	436	39	124	199.667
AAATGTTCAAACTCCAAACC	190	99	36	108.333
AAATGTTCATCCGTTGAAGG	98	177	345	206.667
AAATGTTCTCCACTCACACG	434	283	494	403.667
AAATGTTCTCGGCATATCAG	218	220	296	244.667
AAATGTTCTCTCTATAACAG	31	242	37	103.333
AAATGTTGAAGGATCACCAA	160	148	157	155
AAATGTTGGAGAAATCCTTG	116	482	315	304.333
AAATTAAAAAACAAATTACG	25	8	8	13.6667
AAATTAAAACACAGAGCACG	543	33	109	228.333
AAATTAACCACTTACATGAA	797	382	87	422
AAATTAATGAACAATTTGAG	241	731	185	385.667
AAATTACAAACTGAGAGCAC	164	125	593	294
AAATTAGAGAAGATCATGAG	134	74	125	111
AAATTAGAGACAGAGATTCG	9	207	8	74.6667
AAATTATAGACAAGATGGGA	38	268	120	142
AAATTATCCTGCAGTCAGAG	76	176	129	127
AAATTATGTCTGAAAAAACT	281	58	786	375
AAATTATTACTAACCTGCTG	395	304	97	265.333
AAATTATTATTCCGAAGCTG	726	498	68	430.667
AAATTATTATTCCTAAGCTG	129	29	343	167
AAATTATTCTCGTCACAAAG	30	28	113	57
AAATTCAAAAGAATTCCACG	93	9	55	52.3333
AAATTCACACCTCTACCGGA	43	43	59	48.3333
AAATTCAGAAGAATACGCCA	92	13	79	61.3333
AAATTCAGAAGCCATTACAA	25	22	93	46.6667
AAATTCAGGATCAAGCAGAA	119	25	541	228.333
AAATTCATACCAAACATCGG	102	36	136	91.3333
AAATTCCACCGGTCGTGTGG	94	443	159	232
AAATTCCACTCCCACCAGTG	84	830	299	404.333
AAATTCCCAGTATTCAACCC	18	220	19	85.6667
AAATTCCCTATACACATCTG	365	71	681	372.333
AAATTCCCTGTACACATCTG	266	88	724	359.333
AAATTCCTAGCCATCCGTGG	1299	681	777	919
AAATTCTACTTTAGGGAACG	84	958	924	655.333
AAATTCTGCATCAGAGGCGG	804	136	257	399
AAATTGAAGAATTGCAACAG	452	3463	177	1364
AAATTGAAGAGGTCGAAACC	284	47	119	150
AAATTGAAGTTGGAAAACGG	72	217	82	123.667
AAATTGACCTTTCAGTGAAG	540	302	206	349.333
AAATTGAGTTCCGCTCGCTG	2451	2282	598	1777
AAATTGAGTTTGTGCCACCT	473	809	1238	840
AAATTGATCGAGCCATTAGA	82	200	178	153.333
AAATTGCACTGAGAGCAATG	155	202	47	134.667
AAATTGCCAAGTCTCCCTCC	353	569	162	361.333
AAATTGCCAGAGACATCGCC	267	857	387	503.667
AAATTGCCTTATGTCACCAT	14	89	10	37.6667
AAATTGCCTTGATAATGCTG	519	78	396	331
AAATTGCGACTGCCACGCGT	598	1256	195	683
AAATTGCTGATTATCTGACC	352	40	57	149.667
AAATTGGAAGGCGTTGCAAG	315	438	496	416.333
AAATTGGATGCACAAAACAT	1093	90	243	475.333
AAATTGGCTGCAACAGCTGT	574	491	628	564.333
AAATTGGCTTGGGCTCACCA	445	1087	374	635.333
AAATTGTATCATCAGAGTAA	200	26	415	213.667
AAATTGTATCTATCAAGGAG	44	483	460	329
AAATTGTGGCCGATAAAGGT	688	579	2088	1118.33
AAATTTAAGGAATTGAAGCA	153	34	710	299
AAATTTAATAGTCTAGACAA	31	551	341	307.667
AAATTTAGGACTGATTACTC	279	24	82	128.333
AAATTTGAACAAGCTACTGG	227	88	250	188.333
AAATTTGTTCCGAATCAGTG	550	109	1688	782.333
AACAAAAACCTCCTCAACAT	20	10	63	31
AACAAAACAGCATATTCGTG	222	85	229	178.667
AACAAAACCAGAGTGATCTG	1	11	1	4.33333
AACAAAACGTCCTATCAGTG	150	153	321	208
AACAAAAGAATTTACCACGG	123	38	93	84.6667
AACAAACAAAAATAAGCTCG	154	566	162	294
AACAAACAATGATTTATACC	26	155	18	66.3333
AACAAACCTGTGTGACCATG	917	1174	402	831
AACAAACGTGAGCTCCAGCA	422	110	994	508.667
AACAAACTGAATTGTCAATG	724	481	43	416
AACAAACTTCGACCTGACAT	1000	434	351	595
AACAAAGAATGACATCTGTG	735	100	315	383.333
AACAAAGACAAGATGCACTT	143	23	198	121.333
AACAAAGAGAACCTAGATGG	334	81	123	179.333
AACAAAGAGAACTTGAGCCA	697	482	1165	781.333
AACAAAGAGGATTACAGCAG	188	36	116	113.333
AACAAAGGAACCCAAAGCAG	55	109	86	83.3333
AACAAAGGAAGGGTTTGCCC	149	166	375	230
AACAAAGGAGGCATACCCTA	55	34	113	67.3333
AACAAAGGCAGCCGTAACTC	739	759	538	678.667
AACAAAGGTCATATCCAACA	124	173	188	161.667
AACAAATCTAGGTCATAACC	81	191	310	194
AACAAATCTGTGTGCCACGT	137	483	447	355.667
AACAAATGAGCTTGTTCCTG	569	2809	884	1420.67
AACAAATGCAGTAAACCTGG	108	102	85	98.3333
AACAAATGGGAAGCCTACCT	1062	41	36	379.667
AACAACAGAGCTTGCTACAT	363	268	251	294
AACAACAGCAAACGGCAGGT	564	155	933	550.667
AACAACAGCACTATCCACCG	435	254	395	361.333
AACAACAGCATAGACCCCCG	199	1215	386	600
AACAACAGTGACAAACTGGT	300	83	133	172
AACAACAGTGCACATCAGTG	1050	408	469	642.333
AACAACAGTTACATGTAACA	168	480	258	302
AACAACAGTTCGGCACTTGT	124	780	252	385.333
AACAACATGTGCATCGTAGG	372	4328	645	1781.67
AACAACCACCCACTGGCCAG	643	924	1915	1160.67
AACAACCAGATCAGTCACAA	40	85	46	57
AACAACCCGTCCAATCCCTG	531	538	710	593
AACAACCCTTGATCGAATGG	913	222	562	565.667
AACAACCGGACAGTGCAGCA	1698	526	2190	1471.33
AACAACCTCGATCTTCATCA	42	49	222	104.333
AACAACCTGACCGAGTCCGT	1035	252	673	653.333
AACAACGACTTCATTAACAT	187	148	342	225.667
AACAACGAGACCTAATTAGA	46	40	14	33.3333
AACAACGGCGACATCTACGA	326	481	103	303.333
AACAACGGTTAAGATAATTG	83	398	140	207
AACAACGTTACTGAGATACA	41	755	44	280
AACAACGTTTACCTAAGTCG	113	909	180	400.667
AACAACTATTACCTCAGACG	580	409	138	375.667
AACAACTGATGTTGCCAGTG	892	222	392	502
AACAACTGCACAAATTGCAA	68	46	228	114
AACAACTTCAGGCGTAAGGA	162	252	151	188.333
AACAACTTCCAGAATCAGAC	91	274	207	190.667
AACAAGAAGATAGTCCTGAG	55	13	43	37
AACAAGAAGCTCTCTAAGAT	34	220	2165	806.333
AACAAGAAGTCAGTCTGCAA	629	108	349	362
AACAAGAATCCACTTAAAGG	219	34	29	94
AACAAGACCAATAAGAGGCG	358	59	314	243.667
AACAAGAGTAAGACTCACGA	144	41	703	296
AACAAGAGTGACAAATTGGT	269	962	303	511.333
AACAAGAGTGATACATGATG	3629	205	200	1344.67
AACAAGCAAGAGGACTGTGT	883	432	2041	1118.67
AACAAGCCGATTCTTGACAG	170	8	6	61.3333
AACAAGTACACCAAGAGCCG	1860	437	2898	1731.67
AACAAGTCACCCCCAAAACG	148	353	737	412.667
AACAAGTTTCTTCGACAGAG	47	106	56	69.6667
AACAATAAAAAGCAGTAACT	220	48	26	98
AACAATACCCATGATGCACC	31	316	294	213.667
AACAATACTTCTTGAAGGAA	47	393	340	260
AACAATAGCTCACAACCTTG	110	189	365	221.333
AACAATATGAGACATACAGG	634	207	403	414.667
AACAATATTGAGACCAATGG	20	558	310	296
AACAATCTTTCCAAACCTAG	18	28	7	17.6667
AACAATGGCAAGTTCTACGT	155	286	443	294.667
AACAATGTAAAACATCACAT	186	208	389	261
AACAATTAAGACATCATCGG	85	77	101	87.6667
AACAATTTCTAACAATTGTG	32	210	18	86.6667
AACACAAAATTGTTCATACA	57	407	75	179.667
AACACAAAGAAATAGCCTCG	615	151	727	497.667
AACACAACACAAAATTGACA	6	26	23	18.3333
AACACAACGCAGCTCCGTTG	300	462	431	397.667
AACACAAGAAAACTCCTGAT	380	164	101	215
AACACAAGACAAGATCGTGT	675	448	846	656.333
AACACAATCAGGTCAATTCG	103	466	120	229.667
AACACAATGAGCTACTACTA	746	181	333	420
AACACACACATAGTCAGACG	16	354	456	275.333
AACACACAGTTAAACTGTCA	405	188	141	244.667
AACACACCAAAAGCAGACGA	101	98	219	139.333
AACACACGTGCATGTCTGGG	265	265	249	259.667
AACACAGCGACAGCTCAGTG	142	216	651	336.333
AACACAGGACTACGGTTCAG	521	1835	380	912
AACACAGGAGAAGTATTCGG	0	220	95	105
AACACAGGATGGATACGCAT	228	124	210	187.333
AACACAGTAAAAGTAACATA	76	27	185	96
AACACAGTAAGGCATCGATG	306	1001	767	691.333
AACACATAAGTGTGTTGTCA	310	1100	428	612.667
AACACATCCAATGTAAGTAA	33	112	68	71
AACACATCCTCCTAACATTG	118	77	317	170.667
AACACATGTCTACAAATGAG	96	883	310	429.667
AACACATTTGTTTCTAAACG	177	172	413	254
AACACCAAGGGACCAAAAGG	74	290	466	276.667
AACACCAAGTAATTCAGAGA	31	83	82	65.3333
AACACCAATCATAGTCACTG	689	62	127	292.667
AACACCACCTAGGAAACCCA	210	534	203	315.667
AACACCAGAATATCCATAGT	487	496	347	443.333
AACACCAGAGACATTTCCCA	26	137	111	91.3333
AACACCAGAGCATCTGTCCA	440	2525	935	1300
AACACCAGCAACAAGTATTG	439	56	329	274.667
AACACCAGCCTACCAATGCA	203	378	258	279.667
AACACCAGCGAAAGACTAAG	46	125	369	180
AACACCATCACTCATCCAGT	57	328	551	312
AACACCATCCTAGATAGCAG	18	540	12	190
AACACCATCTACCAGTATGG	390	544	320	418
AACACCATGAGCACCTCTGG	292	663	375	443.333
AACACCATGTCGAAAATCCG	324	152	613	363
AACACCATTTCCATGACACG	332	389	3019	1246.67
AACACCCAACATCCTTGGAC	1154	143	144	480.333
AACACCCACATACCGGAGAT	900	2246	718	1288
AACACCCACCACGACCGCAG	147	133	351	210.333
AACACCCAGATGATCGCCCG	701	742	1067	836.667
AACACCCATCATCAGCACAC	51	35	62	49.3333
AACACCCGGTTGAAAGCAGT	129	506	236	290.333
AACACCCTTACCGTTAGGAA	39	45	17	33.6667
AACACCGAAGTACCATTACT	314	429	1149	630.667
AACACCGAGAAGTTCGTGAG	93	202	171	155.333
AACACCGCAGATCTTAACCA	536	2160	298	998
AACACCGGTTAATCACAAGG	39	210	161	136.667
AACACCGTATCCAAGATCCG	824	410	221	485
AACACCGTTATCTGGCAATG	409	580	553	514
AACACCTCCAGCAGCCAACC	114	101	253	156
AACACCTCCCACTTACGCCG	64	187	553	268
AACACCTCGACTACATCCGG	601	443	240	428
AACACCTGGAGGACACCGCG	238	277	407	307.333
AACACCTTGCCAGTTCCAGG	28	73	13	38
AACACCTTGTACCAGCTCGG	1594	526	668	929.333
AACACGAAGAGACTTGAGCT	2600	569	2075	1748
AACACGATCCAGTTAAACCC	91	128	89	102.667
AACACGATTCATACCTCAAG	29	235	6	90
AACACGCCCAAGAATCATGA	81	252	839	390.667
AACACGGCAATATATAACAT	229	334	290	284.333
AACACTAAGAAACATCCCAC	52	402	84	179.333
AACACTAAGCAGAAAACCAG	22	780	626	476
AACACTAGAGAAAATATGTG	68	620	631	439.667
AACACTATGACAGCGTCCGG	544	163	988	565
AACACTCAATGCTCAAAGGG	548	133	153	278
AACACTCCAATAACCGAGCG	1865	617	463	981.667
AACACTCCACAGAAAGGACC	123	478	723	441.333
AACACTCCCAATTGTCACAA	163	164	76	134.333
AACACTCGGAGGCCATCACT	453	357	514	441.333
AACACTCTAAGTCATTTGAG	192	1306	1005	834.333
AACACTCTCAAGTGTATGGA	54	487	184	241.667
AACACTCTGCTGTCCCATCG	1095	1766	1228	1363
AACACTCTGTGATCATACAT	120	573	16	236.333
AACACTGCAGCGAATTTGCA	456	294	595	448.333
AACACTGTCGCCTATCCAGT	858	405	1005	756
AACACTGTCTTACAAAGGGT	563	310	902	591.667
AACACTGTTTAGGGCTTCAG	313	442	1734	829.667
AACACTTCACTCATGTCCAG	722	307	2264	1097.67
AACACTTCCAGCATGACGGA	566	184	505	418.333
AACACTTGAATTTAGAACCA	92	33	41	55.3333
AACACTTGCAGTGAACATCG	75	201	192	156
AACAGAAATAGGAAAGACAC	28	33	129	63.3333
AACAGAACCCAGGTTAAGTG	2472	663	412	1182.33
AACAGAAGAAAAAAAGCTAG	35	21	267	107.667
AACAGAAGCAGTGAACCTGG	482	260	120	287.333
AACAGAAGTAAAAAGACTCG	236	67	186	163
AACAGAATGGGATACGACAC	386	93	105	194.667
AACAGACACCAGTATTACCG	150	138	80	122.667
AACAGACAGAACCGCAGTCG	1203	596	277	692
AACAGACAGTTCATTTCTGA	158	205	503	288.667
AACAGACTGGTGGATGCTCG	1634	665	479	926
AACAGAGCAATGGTATCAAA	161	40	22	74.3333
AACAGAGCACATTTAAACTG	253	143	147	181
AACAGAGCAGAGATATCAGA	283	124	274	227
AACAGAGCTACAATGCAACG	250	81	345	225.333
AACAGAGCTCCACACCATGA	318	873	395	528.667
AACAGAGGGATGTTCCACAG	765	129	844	579.333
AACAGAGTCTGTCATTCACC	1226	885	862	991
AACAGAGTGCCTGCGGACAA	188	873	679	580
AACAGATATCAACAAAAGCC	46	57	59	54
AACAGATCAAAGGTAGTAAG	69	194	448	237
AACAGATCCTGTGATACAGA	563	156	79	266
AACAGATCCTTGTAATACAG	93	522	103	239.333
AACAGATCGTCCATGCAGTG	2664	2244	10147	5018.33
AACAGATGCAGTAAACCTGG	249	317	269	278.333
AACAGATGGCTAAACCCTGG	728	540	1728	998.667
AACAGATGTGGCTTTACATG	46	33	66	48.3333
AACAGATTCCAATATAAGTG	273	196	672	380.333
AACAGCAAATCCATCAAGTG	416	110	118	214.667
AACAGCAACTACCTCGTCCG	348	465	1108	640.333
AACAGCAAGTCAGCTAGACT	404	1387	569	786.667
AACAGCAATATGGAGAAACC	577	409	244	410
AACAGCACAGCCATTGTCTG	978	1173	1300	1150.33
AACAGCACAGGACTACTAGG	1689	141	342	724
AACAGCACATCCCCCCTGAG	2423	459	926	1269.33
AACAGCACCGATCGTGCTCG	283	501	6245	2343
AACAGCACGAAGGTGAACAT	360	1289	548	732.333
AACAGCAGCTCCATAACCCG	1093	416	733	747.333
AACAGCAGGTCCTCCCCGTG	729	338	309	458.667
AACAGCATCCAAGCATCCCG	67	746	204	339
AACAGCCAGTGTGGCGACTG	1591	1635	1198	1474.67
AACAGCCCGTACCGCATGCG	663	659	1010	777.333
AACAGCCTAGCAGTCAAACC	2064	299	164	842.333
AACAGCCTCTCGGGTCACCA	168	629	783	526.667
AACAGCCTTCAAGATACGAC	27520	261	182	9321
AACAGCGAAGACCTACCGTG	581	220	219	340
AACAGCGATGACACTGAATG	125	158	43	108.667
AACAGCGCCTCATACAAGCC	80	362	407	283
AACAGCGGTGTCATACACAG	173	266	294	244.333
AACAGCGTATGATGATCCCG	272	1049	241	520.667
AACAGCTACGTGGGGTACAA	406	2873	373	1217.33
AACAGCTCATCATGGAAGAG	405	1251	370	675.333
AACAGCTGACTATAAAGTGG	471	293	113	292.333
AACAGCTGTTGGAATCACAC	349	1607	405	787
AACAGCTTCAAGTAACACAG	439	42	279	253.333
AACAGGAAGACCAAGAACAA	12	94	63	56.3333
AACAGGACAAGGCTTCTGCG	1697	1065	251	1004.33
AACAGGACCAGACCACCGAC	21	425	361	269
AACAGGAGGAAATCCTTCGG	351	207	528	362
AACAGGAGGAAGTATTACCA	266	377	709	450.667
AACAGGAGTGTCCTCCACGG	636	423	1369	809.333
AACAGGATCACGGTGTTTCG	103	39	132	91.3333
AACAGGATCAGCCCACACGA	54	23	62	46.3333
AACAGGATTACCGTCATCAC	170	1232	2054	1152
AACAGGATTCGAAAATACCC	75	41	197	104.333
AACAGGATTGGGCCGTATAG	459	109	1043	537
AACAGGCAAGAGCAATTAAG	117	649	464	410
AACAGGCACAATTATAACCC	92	255	788	378.333
AACAGGCACGAATATCAACG	913	205	114	410.667
AACAGGCCAGAGCAACTAAG	1108	115	140	454.333
AACAGGGAAACTTAACTCAG	227	140	361	242.667
AACAGGGCTACCGTCTTGGT	17	258	4	93
AACAGGGTCGATTCTATCTG	28	68	16	37.3333
AACAGGGTGTAGGTACAGAG	648	512	289	483
AACAGGTCCAGCGATCGGGG	1338	269	442	683
AACAGGTCTTGACTCATCAG	192	798	233	407.667
AACAGGTTCAACCTAATACC	155	511	270	312
AACAGGTTCTTGGAGTGCCG	167	1108	740	671.667
AACAGTAAAATGTCTCACTG	911	504	537	650.667
AACAGTAAGGGACAGATACT	162	240	28	143.333
AACAGTAAGGGAGAAATAGT	31	50	24	35
AACAGTAAGGGAGAGATACT	24	34	157	71.6667
AACAGTAAGGGGCAGATACT	183	36	190	136.333
AACAGTAAGGGGCAGATATT	261	368	895	508
AACAGTACGAGTTATCCGGC	459	355	1381	731.667
AACAGTATATATCAGGGCAC	813	169	495	492.333
AACAGTCATCAGTAGCGCCA	28	67	142	79
AACAGTCCAAATAGGCATGG	457	571	1072	700
AACAGTCCGTCCAAAACCAG	532	146	709	462.333
AACAGTCCTAAAGGACTCAG	392	315	659	455.333
AACAGTCGATGTAATCCCGA	158	468	253	293
AACAGTCTGTGACCGAAAGT	617	98	325	346.667
AACAGTGAGTTCCTGTGAAA	174	279	304	252.333
AACAGTGCAGATGACCGCCT	330	289	525	381.333
AACAGTGGTGCCAAGTACGA	260	716	351	442.333
AACAGTTAAAGAATAACCCA	76	148	71	98.3333
AACAGTTAACTGACACACAT	46	234	97	125.667
AACAGTTACTTCCGGCTCAG	603	327	900	610
AACAGTTGAGACATAGCTGG	1025	338	222	528.333
AACAGTTGTCTCGAGTAAGA	30	169	152	117
AACAGTTTAAGAATGGTGAA	504	1902	338	914.667
AACAGTTTGATAAAACTCCG	60	525	20	201.667
AACATAAAGACATCAGCAGG	76	142	234	150.667
AACATAAAGGATCATGCCAG	152	369	465	328.667
AACATAACCTAACTAAAAGG	11	226	8	81.6667
AACATAATAGGTCACAACGA	101	448	82	210.333
AACATAATGAGGTCCCAGCG	2200	874	364	1146
AACATACAGAAAATTATCTG	229	318	104	217
AACATACAGAATTAGAACTG	80	15	253	116
AACATACATAAAATCTTCTG	46	22	5	24.3333
AACATACATAAAATTCTCTG	9	24	54	29
AACATACCCAGTGTGCCAGG	887	760	583	743.333
AACATACCCATTATACTACT	30	80	126	78.6667
AACATACCCGGTATTTGTCA	98	408	23	176.333
AACATAGTAGCCGTGATAGA	885	382	400	555.667
AACATAGTGAAATCTTAACC	1466	482	783	910.333
AACATATACTTCCCGATCAG	38	315	193	182
AACATATCCTCCCAACATTG	201	540	839	526.667
AACATATCTCCATAGCAACA	444	44	77	188.333
AACATCAACACATATCTACT	74	107	122	101
AACATCACACAGATGACTCT	148	268	58	158
AACATCACACCGATGACTCT	555	82	104	247
AACATCACAGCCAACGAGGT	171	1275	784	743.333
AACATCACCACCATTCAGTG	406	168	1370	648
AACATCACTGATCCACCGCG	139	161	161	153.667
AACATCAGCACCGACACAGT	237	215	193	215
AACATCAGCTAAAGAACACG	133	839	358	443.333
AACATCATATTTGAGCCTTG	274	399	273	315.333
AACATCATCTTGTCACATGG	121	59	266	148.667
AACATCATGGAGCTCTACCT	470	508	146	374.667
AACATCCAAAGTTTCCAGAG	18	199	669	295.333
AACATCCAGGAAGTGATCGT	220	85	370	225
AACATCCAGTTCACCTCGGT	289	807	379	491.667
AACATCCAGTTCTGCCAACG	649	887	380	638.667
AACATCCCCACAGTGAACCA	346	526	610	494
AACATCCCTGTAAAATGACG	1064	680	86	610
AACATCCGCGTACTTGAAAG	246	360	142	249.333
AACATCCGCTAAAGAAGCGT	134	274	107	171.667
AACATCCTACCAGCAGCGGG	145	57	853	351.667
AACATCCTATTCGCCAACAG	337	216	1224	592.333
AACATCGACGGGCTTGAGAG	290	220	225	245
AACATCGAGGACCTATACAA	456	264	155	291.667
AACATCGATTATACCATCAA	54	149	120	107.667
AACATCGCAGAGAAACATGG	5	55	37	32.3333
AACATCTACAGCCTTAATGA	168	124	135	142.333
AACATCTATATGCCCACTGT	53	59	32	48
AACATCTCCCCACGAACTGA	259	1448	198	635
AACATCTCTACTATAATCAC	117	156	496	256.333
AACATCTGGAATCATGGTCG	281	748	145	391.333
AACATCTGGACACATCTGCT	403	738	783	641.333
AACATCTGTCAGTTGTGGAG	646	850	717	737.667
AACATCTGTCCCAAGCATCG	941	678	187	602
AACATCTTAGTGATGTACTG	11	20	366	132.333
AACATGAAAACCGACATATG	633	27	1892	850.667
AACATGACCGCCTACAACAA	390	110	153	217.667
AACATGACGTAGACACTCGG	591	185	150	308.667
AACATGACTGTCAAGAACCG	396	317	113	275.333
AACATGAGGAGGCAGCGTTG	322	211	788	440.333
AACATGAGGTAACAGCCACA	1260	361	1077	899.333
AACATGCCAGGGGAAACTGG	134	516	108	252.667
AACATGCCATGTGAGAGCCA	258	387	1216	620.333
AACATGCTGCTAGAAATCGG	755	404	254	471
AACATGGACAACTCTTCCGG	234	426	182	280.667
AACATGGAGACCAGACGCAA	132	44	113	96.3333
AACATGGATCCAAGAGTCAG	335	708	91	378
AACATGGCACAAATGCAGCA	276	122	806	401.333
AACATGGCGGTATTTACACA	225	484	631	446.667
AACATGGGGAACATTAACCC	315	486	161	320.667
AACATGGTATAATGATTCCC	171	244	259	224.667
AACATGGTTATCCCCACACA	1302	920	196	806
AACATGTATAACCACCTTCG	90	315	341	248.667
AACATGTATCATGGCCCCCC	1655	611	2024	1430
AACATGTCGGACAAGTACGG	74	113	391	192.667
AACATGTCGGAGTCCGAGCT	59	19	101	59.6667
AACATGTCGTATGTCGCCAG	274	184	109	189
AACATGTCTATCAGAGCAAG	663	241	333	412.333
AACATGTGACCTAAAGACAA	108	70	99	92.3333
AACATGTGAGTTGAGACAGC	384	203	230	272.333
AACATGTGGAAGTTTCCAGG	322	1389	654	788.333
AACATGTTAAGTCGCGTTAT	388	258	422	356
AACATGTTAGACATCGGTGG	583	600	151	444.667
AACATGTTCCGCATGATCCG	1226	226	555	669
AACATGTTGCAAGAGATCAG	101	705	646	484
AACATGTTGCAGCAAACAGG	710	455	315	493.333
AACATGTTGTGGAAGCTCGG	203	180	214	199
AACATTCAATTGAAACACAG	60	29	233	107.333
AACATTCCGGACGTTCCTTG	198	252	558	336
AACATTCCTTCGGAACTGAA	289	43	108	146.667
AACATTCTCCCGGTATCCCA	11	31	13	18.3333
AACATTGAAACACTCTACCT	1527	1664	474	1221.67
AACATTGATCAGACGCAGGG	201	335	211	249
AACATTGGACATCTCAGGCA	1451	377	193	673.667
AACATTGTAGAACTTGACCA	156	258	188	200.667
AACATTGTGAGCCAAGTCAG	173	351	576	366.667
AACATTTACCTGTACCACAA	46	215	25	95.3333
AACATTTCCGTAAGTAGTCA	132	452	741	441.667
AACATTTGGACACATCTCCT	903	783	563	749.667
AACCAAAGAGATAATAACAG	521	5	10	178.667
AACCAACAGAATCATTATGA	9	71	258	112.667
AACCAACATGCTTGTCGCTG	134	597	685	472
AACCAACCAGTCTTCATGAG	2052	557	1373	1327.33
AACCAACGGGATGAAAACCA	214	155	32	133.667
AACCAACTTTCCTAAAAAGG	318	28	12	119.333
AACCAAGAAGAGGCAACATG	370	299	287	318.667
AACCAAGAGAACCGTTTCTG	135	233	169	179
AACCAAGAGCTTCATACCTA	139	264	111	171.333
AACCAAGATCTGTGATAGCT	46	238	137	140.333
AACCAAGCTAACTAAGCAGG	1340	263	98	567
AACCAAGGTCTGTAGTAGAG	350	1244	671	755
AACCAATGGAATAAAGACGA	20	69	61	50
AACCAATGGCTAACAAGATG	157	597	249	334.333
AACCAATGTAACCTACCCGC	150	237	873	420
AACCACAAGCTTATAACTAG	186	26	413	208.333
AACCACACTAGGGGCTACGA	25	31	13	23
AACCACAGAAGGGAAACGGG	308	22	270	200
AACCACAGAGCCTCTATCAA	739	312	155	402
AACCACAGATCTACTTCCTG	2444	213	2064	1573.67
AACCACAGCAGCCCCAACAC	245	840	723	602.667
AACCACAGGCTTATAAGGAT	317	484	722	507.667
AACCACATTAGACTCACAGA	131	16	8	51.6667
AACCACATTGCAGTAGCGGT	868	336	719	641
AACCACCAACTCATTGATGG	861	238	975	691.333
AACCACCAATTAAATATCCG	287	383	387	352.333
AACCACCACTAAAGGCTCCG	223	270	429	307.333
AACCACCAGAGACTGAATGC	1122	855	244	740.333
AACCACCAGCTCATTGACAG	246	475	814	511.667
AACCACCTGTATAACTACCA	205	1091	169	488.333
AACCACGAGTCAAAACTCTG	277	79	176	177.333
AACCACGCTTTCCACACGTG	460	3302	754	1505.33
AACCACGGATTGGTACCAGA	638	487	154	426.333
AACCACGGTCTGATGCCCAG	495	694	424	537.667
AACCACTAAAGACCAAGTCC	75	1588	245	636
AACCACTAAATGGCCAGCAG	474	1431	345	750
AACCACTAACGAGCACCCTG	102	340	365	269
AACCACTGTCCTGAATGACA	186	307	822	438.333
AACCACTGTTGGCAGCGACC	197	1777	321	765
AACCACTTATACAGCCTAGG	384	80	78	180.667
AACCACTTCGGAGCAAACGC	62	110	157	109.667
AACCACTTGAAAGTGGCTCA	264	404	958	542
AACCAGAAATCACACCATGG	199	71	635	301.667
AACCAGAACATCACTTATGG	418	2501	2866	1928.33
AACCAGAATGCCAATGACGA	72	331	397	266.667
AACCAGACCCGCACCTACGA	1531	221	177	643
AACCAGACTCTGATTCCATG	310	191	411	304
AACCAGAGGGAGATTGCACA	292	279	647	406
AACCAGAGTTATACAAACAG	106	27	28	53.6667
AACCAGATCAGATCGAAGGT	130	579	893	534
AACCAGCACACATAACTGCA	114	328	297	246.333
AACCAGCACTAAAAGTAAGT	3105	279	35	1139.67
AACCAGCAGCAAAACTACCA	219	175	62	152
AACCAGCATCTTGATGACTG	2599	1081	562	1414
AACCAGCATTTGACCGCGCT	175	340	600	371.667
AACCAGCCCTCGAAGTTCGT	407	1164	682	751
AACCAGGCAACGGTGCTCGG	781	597	249	542.333
AACCAGGCCAATAAGCGACA	75	446	606	375.667
AACCAGGGTTGCTACACCAG	59	777	236	357.333
AACCAGGTACCCGACGACAG	499	243	343	361.667
AACCAGTACGTGAGGGACCA	742	1175	705	874
AACCAGTCGGCAAATACGTG	421	160	1045	542
AACCAGTTACCTGTCCAAAG	116	214	379	236.333
AACCATACCAACGAGACCTT	581	452	234	422.333
AACCATAGCAGAAATCTACC	311	68	449	276
AACCATAGTGAAGACATCTG	2884	929	253	1355.33
AACCATATATCGTCATCACT	174	517	198	296.333
AACCATATGGAACAATTGTG	519	150	290	319.667
AACCATCCGAAACTATGCTC	111	68	373	184
AACCATGATACTGCCTACTG	77	846	113	345.333
AACCATGCCATGTAATACTG	27	23	11	20.3333
AACCATGGAGAATCATGACA	291	109	115	171.667
AACCATGGGATGCATCCGGG	599	99	57	251.667
AACCATGTGTCAGGACACAA	100	177	908	395
AACCATTCGATACACGCCTG	1099	833	709	880.333
AACCATTGCAAAATACACAT	611	144	26	260.333
AACCATTTGCCAGATAGCTG	585	300	87	324
AACCCAAGACTCGTACACGC	328	262	525	371.667
AACCCAAGGAAAGATAGCTG	483	28	226	245.667
AACCCAAGGAAAGATAGTTG	20	50	31	33.6667
AACCCAAGTAGGCCTAACCA	432	1091	317	613.333
AACCCAATATGAAACAACCG	334	781	95	403.333
AACCCACAACGAGAAGAAGT	994	2263	186	1147.67
AACCCACATGTAGAAGGACT	327	304	772	467.667
AACCCAGAACAGTCTCGGCT	591	522	134	415.667
AACCCAGAGCGACTCCACGG	2068	1660	750	1492.67
AACCCAGATATAGTGCTGTG	356	638	703	565.667
AACCCAGTCACTACCGCCTG	116	1537	1213	955.333
AACCCATACCATCCAATCTG	124	1184	118	475.333
AACCCATACTATTCTGATGC	47	137	25	69.6667
AACCCATCGGAACGGAACCA	234	174	519	309
AACCCATGCCAACAATACAC	96	28	133	85.6667
AACCCATTGTGACTGCAATG	467	610	617	564.667
AACCCCACGAGCAATCAAAG	208	335	18	187
AACCCCACTCAGCGAATTGG	809	1241	274	774.667
AACCCCATAACATTCTGCAG	189	92	494	258.333
[truncated: 77,634 more rows]

## Sheet: Gene_Level_Results
Gene Symbol	Average LFC	Guides used to obtain the Gene Symbol associated Average LFC	Individual LFCs for each respective guide contributing the to the gene symbol associate Average LFC
Plekhg2	0.606094	TCGCGACCTTCGCAGCATCG;TTAAATCCTAAGGGGTCCCG;CCCCTCTAAGACGTGCAGTG;GTCCCCGACGGGTCCAACGT	0.31;0.47;0.78;0.87
Plekhg3	0.333663	AAGATCTGTCCTGTTCCGTG;CATCGACACCATGACGTGCG;GCAGGACCTACGGAGCATTG;GCTTTCGATCAGCATCAGTG	0.24;0.27;0.34;0.49
Plekhg1	-0.201745	GTTATCAATATGCTTCGCGG;CGGACCACAAAACATGAATG;CTTCCGTGGCCTTATCAAGG;GCAATAGGCAGATTACAGCG	-0.55;-0.52;-0.15;0.41
Plekhg6	0.291238	CCTTCGAGTAAAGCAGACCA;TCTGATGACTCCTGTACTAG;TCTGGTTCCCGAAGCACCAG;GTTCTACAGAGCGTGCACGG	-0.23;0.28;0.43;0.68
Plekhg4	0.129422	GGCCTCGACGTGGACCGAGG;ACAGCTTCGACCGGAATCTG;CATCGGGTCGATCTAACTCA;GGGTGACAATGACTATCGAG	-0.21;0.18;0.21;0.34
Plekhg5	0.100473	CTTGAAATTCGACCTGAACG;TCCACACGTTCCGACACAGG;GAGATCGCCAAGCTACACCG;GACAGATGATCCCCGCACCA	-0.34;-0.09;0.36;0.47
Nsa2	-2.02452	GCAGAAACGGAAAGAAAAGG;TAGGCAGGGACTGCTCCCTG;GAAAACCACCGAAATATGAA;GTATTGAAAGTTATTCGGAC	-2.57;-2.35;-2.34;-0.83
Nampt	-0.60402	GCCTCCTGCCAGAAATACGA;CAGACCATCTAAGTTACCAG;CTAGTACCATAACGGCTTGG;AATGCGTGTGAGAAAATATG	-1.75;-1.21;0.26;0.28
Vmo1	0.117831	GGAGCCATTTACATTCCCAG;TCAACGATCGATGCATAGCG;GGACTGGGACTCCACGACGT;GTGACCAACGGTGGTACCTG	-0.56;-0.3;0.4;0.94
Man2a1	-0.283532	ACAATCCCTTTGAACAAGAA;TGCGTCGAAATAATCTGACA;AGGAACCGCGAAAGACTGGG;CAGCTGGAAATTGTGACCGG	-1.85;-0.26;0.46;0.5
F930015N05Rik	0.149405	TAGCTGCGGTCAAAAAAGTG;CTGGCCTTACTTCTGGACGA	-0.17;0.46
4931406P16Rik	0.194126	TGGGCAATAATATTGATACA;AAAAGAGTCATGTTACCATG;GGGGCGATGTTTCTTGACAG;CTGTGAGGAACGTACTAGCA	-0.46;0.01;0.41;0.81
Mier1	-0.0770971	CAGGTCCGAACAAGATCAGT;TCAAAATATTTACATCGACG;TTTAATGTCAAAGCAGCTCG;CTGAAATAGAGGATCTTGCG	-0.37;-0.03;0.01;0.09
Mier2	0.113718	CGTGAAGTGTAATTTCAACG;TGTACAGGGCAGTGAAACGG;GCAGTGTCCTGACAAGCCGG;GGTTCACACAGGTACGCACG	-0.06;0.09;0.14;0.29
Mier3	-0.286611	CTATGAATCTACAATTCCAG;AAACGCTATAACCATCACCC;TTCTCAATGAGGTCTCAACA;TCTTACATCGTAAAGGCCGG	-1.47;-0.28;-0.07;0.68
Aqp11	0.0561922	CTGTTGCCGGGCGATCACGC;GGCACAGCTAGCAACCCGTG;GATGATCGCTTTGGACATGT;CCCCCGAAATGGGTGCCGTG	-0.47;-0.17;0.07;0.8
Aqp12	0.467452	CTGCAGCACGGATGTACGCA;GCAGCGATGCCTCCACCATG;GTCCGAAGCCCCCTGCCCAG;ACATGGGGTCACCTTCGATG	-0.07;0.17;0.31;1.45
Dag1	-0.36795	GACCTCGATAGAGAACACAC;GGCGTAGGCACTATCCGCGA;TGGTTAGGTTCTCCCCCACG;GTCTGGAATGCCAACCACGG	-1.99;-0.01;0.25;0.28
Myadm	0.297057	CGCCCGAGCGGACCCCACAG;ATATAGCCAGTGATCTCACC;CCTAGCTCATGGACGTACCC;GCAGCTAATATCCACCTGTG	-0.01;0.23;0.38;0.59
LOC115490439	-0.11572	GGAGGTGGTACAATACACCT;GGCCGAGTGATAACATGTTG	-0.2;-0.03
LOC102633156	-2.69644	TTGTAGAGACTCTTCTGAGA;GTGTTCGCTTATGTATTTGG;CACCATGACTGTAACCAATG;ACCACATTGAATAAACTCAG;CTGCAAAGGCTTTACCACAT;CCACACTGTTTACATTCATA;TGACTGTAACCAATGTGGTA;ATACATAATCGAACACATGC;GTTCACATGCACGTCATCAT;GAGTTCACCACTACTTGCAA;AGGCATCAAATTAAACATAA;ACCACACTGTTTACATTCAT;GAGATGACTGCTATGTGCAA;ACCACATTGTTTACAGTCAT;CCCTATGAATGTAAACAGTG;GACTTCTAGAAGTTTGAAAA;CCCTATGACTGTAAACAATG;CATATGAGAGTGGTAGACAA;GTGGTAAGGACTTTAGAACA;…	-3.55;-3.51;-3.46;-3.45;-3.41;-3.35;-3.27;-3.11;-3.04;-3.01;-2.97;-2.82;-2.76;-2.5;-2.43;-2.18;-2.16;-1.78;-1.6;-1.55;-0.71
Zfp712	0.131098	GGAGAAACGCTACATATGTG;CTGATGCTGAGAAAGTGATG;CTTCTGATGTTTATGTAGGT;GCAACAGTAGCAGCACACCC	-0.49;0.24;0.25;0.53
Zfp710	0.570669	GTCGTCGATGTCATGTTGGG;TGGGAAAGGAGGATCGAATG;GATCGATGACTCCTACCTAG;ATTGACTGGGACAGCCATGG	-0.03;0.45;0.78;1.09
Zfp711	-0.591322	GCTTATTACAGAAACCGTTA;CCATTGAAAATCGCTAGCGA;AAGCCATAAGCTCATAAACA;TTTATGGTAACAGTAGAACC	-1.43;-0.58;-0.5;0.15
Zfp715	-0.419805	GTGCATTATCAGAATCACAC;TCATGAATATCAAAAGCCCA;GACCGTGTAGTTCATACTGG;AAACGGTTTCCATAGATCAG	-2.19;-0.73;0.11;1.14
Mllt6	0.158667	AGTCATAAGGACAAGAAACT;TAAGTCTCCCCATATTACCG;GTAGAGGGCGCACACCACAT;TCTAACTGGCCACCCGCACA	-0.42;-0.33;0.47;0.91
Zfp719	0.309699	CTACAGCCACCTCTTGTCAG;GGAGCAGGATGGATTGTGTG;CAGTTGAATATACTGGATGT;ACTAGCCTTCAAGTGCTCCG	0.14;0.19;0.22;0.69
Mllt1	-0.0820326	CTAAAAAGAGTGGGTCAAAG;TAGGTGATGGTAATGCCCGA;CTGCTCTCTGAGTCCTTGCG;AGCTTCCCTAAACCCAAGCG	-0.6;-0.1;0.15;0.23
Mllt3	-0.223463	TCCACGATGTCATCAAACGG;AACTTTCAATAACCCCACGG;ACTTACTCACCGTCACCAGT;AAGGAAAAAGAGTAGCTCGG	-0.44;-0.41;-0.41;0.38
Rasl10a	-0.0257077	TACGACCTGAGTATCCGCGA;GATGTCGTAGACCAGCACAA;TCCTGAGCGCCACCGACCCA;TCGATTATGTTAAAGCCCTG	-0.36;-0.18;0.09;0.34
Btg3	-0.143952	TGCATCTTGTACAGCGACCT;GGACCCTGAGTGATAATCAG;TCTCCGAACACCTTACCTGT;ACTCTGGGTGGATCCGTGTG	-1.23;-0.08;0.02;0.72
Btg2	-0.269226	GAGACTGGAGAGGAAACCCA;CGTGAGCGAGCAGAGACTCA;TTCATAGGGATCAACCCACA;CGATAGCCAGAACCTTTGGA	-0.89;-0.65;0.15;0.31
Btg1	-0.704084	TATGGTTGATGCGAATACAA;CCAAGTTCCTCCGCACCAAG;ACTGCTCAGTCCAATCCGCT;GATAGGCGAGATCGCCGCCG	-2.68;-0.31;-0.15;0.33
Smok3a	-1.06036	ACTCTACCTCAGAAATGACA;ACCATAACCTCAGCAACAGT;CCTTGCACAACTCCATAATG;CCTGCAATTGTAAAAGCAAT;TGACGGCCAACCCCAAACTC;TGCTTGCAGCATAAAAAAGC;CCACGTGAGTGCCTGTGAGG;CTCATTATGGAGTTGTGCAA	-2.44;-1.69;-1.36;-1.14;-1.04;-1.04;0.02;0.2
Smok3c	-1.36608	ACCATAACCTCAGCAACAGT;TGACGGCCAACCCCAAACTC	-1.69;-1.04
Smok3b	-1.06036	ACTCTACCTCAGAAATGACA;ACCATAACCTCAGCAACAGT;CCTTGCACAACTCCATAATG;CCTGCAATTGTAAAAGCAAT;TGACGGCCAACCCCAAACTC;TGCTTGCAGCATAAAAAAGC;CCACGTGAGTGCCTGTGAGG;CTCATTATGGAGTTGTGCAA	-2.44;-1.69;-1.36;-1.14;-1.04;-1.04;0.02;0.2
Nupl1	-1.07755	TGGCAGGCTTAGATCCAAAG;TACTAAAGTCTATACCACCA;GAGAGTAAGACCACTAGCTG;CCTAGACGCGACGGTCCCGA	-1.41;-1.19;-0.91;-0.81
Nupl2	-1.1724	GCTTCCCCAAGTCCACACCA;AACGAGCATCCCGGCGCCCG;TAGGGAATAACCGTCGAGGG;TTTGGGAGTCGTCGGGACAG	-2.02;-1.01;-0.94;-0.73
Ttc30a2	-0.305679	GTACCAGCTGAGAAACTACG;TGATAGCAGCTTGTAAACGA;ATTGCCAATATCATTGAGCG;CCAGATGGTTTGGTCAACAT;CGAGCTCGAACTCCTGCAGG	-1.17;-0.48;-0.21;-0.06;0.39
Npat	-0.987641	GCCCAATTTCAACTCCAGTG;TAAAACTAGCAACTCAACAG;AAACTTTCACCAATCCCAGG;CAGACTCAAGGGTAATGTCA	-1.18;-1.17;-1.02;-0.57
Ttc30a1	0.0592054	GGACTCGAGTCTGATAGGCG;CCAATGCCAAGTTGTAGGAA;TGACATGCCTCCTAGAGCAG;CCAGATGGTTTGGTCAACAT;CCTGTATCCAGAAGCCACCA;CGAGCTCGAACTCCTGCAGG;GAGGAACTTGTAAGTTAAGT	-0.47;-0.13;-0.13;-0.06;0.26;0.39;0.54
Gga1	-0.0126202	GTCCGACTTCACAATCCCTG;GGCTAATGACAATCTCACCC;CAAGCGGGTGAATGCCATCG;GCACCAGCTCAGATAGTGTG	-0.5;-0.38;0.27;0.57
Gga3	-0.208837	CATCTAGGAAACAGTCACTG;GTACTCGTCAGACGCCGACA;GGATCAGCGTTCTATCCATG;AACAGCGAAGACCTACCGTG	-0.56;-0.18;-0.18;0.08
Gga2	-0.457865	GCAAGATCCCAAACTACCGA;GATATGCATGAACCACTGTG;GAATCAACGATGTTCCCACT;AAGGAGCTTACTTACCCACT	-1.84;-0.22;-0.08;0.31
Sorbs1	0.197262	AACAACTATTACCTCAGACG;CTTGGGAATCGGTTTCAATG;AGCTCGGGGAATTTGTACGT;GAAATCATCGAGTGTCGGGA	-1.0;0.14;0.61;1.04
Sorbs3	0.323444	AAGCGCTGGGTGAAGTACGA;TTCTGCACGAACTAGAAACT;GAACTGAAGTAAGGTGCATG;ACCCAGCATGGTATCAGACC	-0.17;0.06;0.66;0.75
Sorbs2	-0.541376	AATGTTCAAGCAAATCCACA;GGACACCAGGAAATTTCGAT;AGACAAAAGATCACCGACCC;AAAATGGTTTGTGTCCCAAG	-1.54;-0.97;0.09;0.26
Tshz2	0.112514	GTGGACACTCAAATCTTGCA;GAGTTGTTGCAAAGTATCAT;CGAACAAGGTGTGAAAAGCG;TGTTGGATAACTTGAAGCCG	-1.08;0.31;0.35;0.87
Tshz3	-0.175973	ACCAAGAGATGCGTGCAAGG;ATCACGCCAAATAATCGGTA;TAGCGCCGCCTACGACACCC;GACAAACTTTCACGCCATGG	-0.45;-0.43;-0.24;0.42
Tshz1	0.466427	AGGGCTCGGATTCAGAAACT;GACACATTGCTCTTATGGGG;AGAATGGTGCTAGTTACACG;CCTTTATCAGTACCTGCGTG	-0.03;0.2;0.56;1.14
Bbof1	-0.766493	GCAATCATAGAGAACCAAGC;AAAGAAACAGCAATATAACA;TGAGAAGAGGATCATAATGC;AGAGAATGTTTATCTTCACA	-1.61;-1.55;-0.04;0.13
Speer4d	-1.67195	AGAGATCCAGCTCACTACCA;CCGAGGAATCCATGAACAAG;GGAGGCCCAAGAGAACAAGC;AGAAGGAGACACATTTCTAT;CTTGCTTATGACAGGTACAG;GAAGTTGATGACATTGCAGC;CACCAAACATTGGTGAATGA	-3.14;-2.84;-2.79;-2.26;-2.0;0.35;0.97
Speer4e	-1.17893	ATGCTGACCTTCCATCTGAG;AGAAGGAGACACATTTCTAT;GGAGGCCAAAGAGACCAAGC;CTTGCTTATGACAGGTACAG;TCGCCTGATCTACGTGACTG;CTCCTTCTTGAGCTCCTGCT;GGAATGAAGGACGAAGTAGG;ATGGGAGTGATACCAGAGAG;GAAGTTGATGACATTGCAGC	-2.71;-2.26;-2.14;-2.0;-1.18;-0.41;-0.26;-0.01;0.35
Speer4a	-2.81812	CTGGGGTCAGGCCCTACCAC;CCTCTTGTTCATGGATCCCT;AGAGTAATGAAGGACGAAGG;GGAGGCCCGAGAGAACAAGC;GGAGGTGGACTTGGCGAATG;TGTCGAGTTTGCCTGTGGTA	-3.61;-3.38;-3.34;-3.19;-2.06;-1.34
Speer4b	-2.2481	CCTCTTGTTCATGGATCCCT;AGAGTAATGAAGGACGAAGG;GGAGGCCCGAGAGAACAAGC;CTTAGAGATGAAGAACATGG;GATGGGAGAGAGACCAGAGA;GGATGGGAGAGAGACCAGAG;CTTGCTTATGACAGGTACAG;AGAACTAAAATTAAAGGAGA;GGAGGTGGAATTGGCGAATG;AGAAGGAGATAAATTTCTAT;AAGCAAGAAGCCGTTTGAGA	-3.38;-3.34;-3.19;-3.14;-2.84;-2.54;-2.0;-1.23;-1.2;-1.11;-0.77
Speer4c	-2.492	CTTCATTACTCTCAGATGGA;CCTCTTGTTCATGGATCCCT;AGAGTAATGAAGGACGAAGG;GATGGGAGAGAGACCAGAGA;GGAGGCCCAAGAGAACAAGC;GGATGGGAGAGAGACCAGAG;AGAAGGAGACACATTTCTAT;GGAGGTGGACTTGGCGAATG;CTTGCTTATGACAGGTACAG;AAAACTGAAGTTAAAGGAGA	-3.8;-3.38;-3.34;-2.84;-2.79;-2.54;-2.26;-2.06;-2.0;0.09
Arhgef28	0.331107	CACTGACCTACCTTCAAGTG;AGAGTCTTGGAGTCTCGTGG;AACCTGTTGGCTCGTCGCCG;AGACTCGGGACTCGTATGGG	0.17;0.19;0.35;0.61
Trnt1	-1.55159	CATGAATTAAGAATAGCAGG;AACCTGTTCTCACCTATGTG;GGCAGAATTGTCGACAGACC;ATTCGCATGATCAACAACAA	-2.42;-1.65;-1.16;-0.97
Arhgef26	-0.0393818	ATACAATGACTAAGACCGAG;TAAATCCAATAGTCAGAACG;AGGACAAGGAACATTTGATG;GTCCACTTCTAATGGCACCG	-0.74;-0.2;-0.04;0.82
Glp1r	-0.435772	CCTGTACATTATCTACACAG;ACATTCACGAAGGAACCTGG;CACTCCGACAGGTCCCTCCA;AGAAATGGAGAGAATACCGG	-1.85;-0.52;0.3;0.33
Lmna	0.0917481	TCTCAGTGAGAAGCGCACAT;ACGCACGCGATCGATGTACA;AACTGCGTGAGACCAAGCGC;GAGGAACAGCAACCTCGTGG	-0.66;-0.2;0.51;0.72
Fndc3c1	0.0760874	ACGTGGTAAAACCAAGAGCA;ACCATTGCTCACATACCCAC;TCTGAGGCCATCATTTATCG;TCCTGATGTATAGAAGACTG	-0.61;-0.3;0.33;0.89
Gm17330	-3.79689	CAGTCATACCTATAACAGTG	-3.8
Zdbf2	0.17942	GCCTAAACAAGAGTTCGATG;CAAGACAGCAGAATCCTGTG;GATGCGAGTTATGAATCTAG;GCAACTGCCAGTACTAACCG	-0.3;-0.01;0.05;0.98
Sorcs1	-0.099662	ACGAGGAGTCTACTTCACAC;TGAAGGTGTAGCGAACAGTA;TTTCCCAGGTTACATCGACC;AGCTCTATGACTATAACCTG	-0.84;-0.18;-0.17;0.79
Sorcs2	-0.438382	CAACCCATCCACGAACACTG;GTACCGTGCCTGACACATAG;GTAGGTTGTCCCAAAATCTG;GGGAATAGCGAACCCCACGC	-1.64;-0.1;-0.01;-0.0
Sorcs3	0.163522	CTTCAGTCCGTATCTCCCCG;TCACACCAAGGGTTCGCGAG;ACGTGGGATCTACTTTACCC;CCAGTCCAGACACCGACCTG	-0.52;0.17;0.26;0.74
Trim34a	-0.350702	GAGAATCTAGTACCACACAC;GACAGGCTTGGCATACACGG;TGTAGTAGAGAGACTCGGGG;GTCAGATACAGAGTTGCTGC;GCTTAGAAGAATCCTGGACA	-1.31;-0.69;-0.01;0.13;0.13
Trim34b	-0.395058	GGCATGCTACAAAAGTTCAG;GAGAATCTAGTACCACACAC;GGACAAGAAGGTCATTTGCT;TGTAGTAGAGAGACTCGGGG;GCTTAGAAGAATCCTGGACA;AATGCAGTGATCAACCCCAG	-1.32;-1.31;-0.08;-0.01;0.13;0.22
Prepl	-0.840062	ACGACGCTTCCATTACAGGC;TCTACACAGAGAAAGACCCA;TCAGTGCGCTCCCTAAAGGT;CTTCACACAGCTGATGCGGA	-1.52;-1.31;-0.63;0.1
4933412E24Rik	-0.318681	GGGAGAGCTTTCCATCAATG;ACACTCAAATGTCCAGACCA;CAAAGGCAGCAAGCTCACGT;GCAGATCTTGGGTCACCCCG	-0.78;-0.27;-0.26;0.03
Cdhr1	0.569347	CTCCATGGACCGTCACAGCG;CCTGGCAATGTAGTAGTGCG;TGTAGATAAGCCCAGTGGAT;TTACATCATCCGGGTTCCAG	0.38;0.48;0.67;0.74
Cdhr2	-0.3668	CTCCGTCAACGCGAACACTG;GACCTGGATGGGGATGAATG;TAGAACTCCCTGATAAACCG;AGTCAACTTCATAGGCTACG	-1.17;-0.42;-0.19;0.31
Cdhr3	-0.245735	GGCACATCAAACACGTACGA;TGTCTACATTCTCACCGTCG;TCCAGGGTACTTACCCCGAG;CAACCCAAGGCCCTTCACGG	-1.44;-0.45;0.43;0.48
Cdhr5	0.113449	TTCATCATCAACGCACACGA;GATATGTGACAGCTGAGTTG;AAGAACCATCCGTGTAGAGG;GATCCTAAAGGCATAAGGAG	-1.06;0.28;0.41;0.82
Gm3278	-2.26234	AGAACAACAGAGAAGGAAGA;CAGTTCCTTGGAGTACTGCA;TTTGTGGATCAGCATTAAGG;GGAAGAAAAGAGGTTCTGTG;GAAGGAAATCATTCTGGAGA;AATGACATGGAGGAAATGGG;TTCTTTGTGGATCAGCATTA;CTCAACTCAGCGAAAAAGTA;AAGAACTGAAATTGGATATG;CCTGGAACTTTACATATATG	-3.1;-3.01;-3.0;-2.99;-2.95;-2.73;-1.85;-1.43;-1.04;-0.52
Gm3272	-2.79606	GGCCGGTGCTGAGTATGTCG	-2.8
Olfr523	-0.13018	AAGGAGATGGCTCCACCCCG;ACGGTGGCATCATGACACCT;CAAGATGAATGGTCCTGGTG;GTGCAGGAAAGCACTATCCA	-0.62;-0.29;0.16;0.23
Olfr522	-0.181475	GGACAGTAAGAAACACTCAG;TGATGGTGCCCACAATGACC;AGGCACTAAGAGCTAGATGC;GAGGCGAGAGATGAGAGCCG	-1.57;-0.31;0.39;0.77
Olfr521	0.310439	AGTGATACAGACTTCCCAGA;AGAGGATGTCTAGAGCCGAG;CTTCTGAGCAGGAGAAACTG;GTAGAGAGGGGATGCCGGTA;CAGAAGCCCATGAGTGTCTG	-0.59;-0.15;0.68;0.78;0.83
Olfr520	0.088283	TCTACCGTCTTCTACCTGGT;AGAGGATGTCTAGAGCCGAG;AGTGGTAAAGACCTCTCAGA;CAGAAGCCCATGAGCGTCTG	-0.4;-0.15;-0.13;1.03
Olfr527	-0.0108409	ACTAACACCAGCGTGCACAC;TGCTCCAACGCAATTGAATG;TGCTGTCCAGTAGTTTGGGT;CCAGGAATGCACACACCCTG	-0.48;-0.23;0.32;0.35
Olfr525	0.199933	TGTACAGACGATGTCCAACA;ATGGCACGACTCAATTTCTG;TTTCCTGACCTGGTTTCTAG;CCTGCTCGCCGGCAGTGTGT	-0.51;0.1;0.32;0.89
Olfr524	0.389348	ATTTCTCGTCTAGGCTACTG;ACATAGGCTTGTGCAGTGAG;GACACCCAAGAGCGCGCACT;ACAGCCCTAGAAGGCTTAGG	0.19;0.41;0.47;0.48
Gm10644	-0.371961	GGAGATGACAATACCAACCC	-0.37
Gm11824	-3.40028	AGGGAAGTACTCCGCATGCG	-3.4
Zik1	-0.437779	CCACAATCTCTACACTCCCA;TTTGCACTCATAAACTCCCA;GAAGGCTCAGTATATCTGGG;TGGGCAGAAACATAGTACAG	-2.24;-0.81;0.6;0.7
Usp8	-2.48799	CTGAACTAAACCAGTCGAGA;TCTTTCAACTAGATACGAAG;GCAGTTTACAACCAATGCTA;GGGGGAATGGTAGTAACGAA	-3.0;-2.7;-2.38;-1.87
Usp1	-1.09951	AGATCCAAGAGAAAAGCTAT;CCTGGCTGAATTATCCGGCA;TCTCTTCTCGCAGCTTACTG;AGGAAGTAGCGTCACACCTG	-2.11;-0.86;-0.76;-0.67
Usp2	-0.204334	AGGAACTTACCGTGTTCCCA;AATCCATTAACGTCACCTCA;TACTTACGGGAGATGATCAA;TACTTATAGCCCATGAAGCG	-0.47;-0.18;-0.08;-0.08
Usp3	0.42709	GTGGTCAACGACACCAAGCT;GAAGGCGAACATACCACACC;AAGGTAGCGCATGAATTCAT;TGGAGGAATTCTCCAGAACG	0.21;0.26;0.28;0.96
Usp4	-0.183823	AAAATGGCAACTTAGCACAT;GCCGTCGAGTGCTTCCTCGG;GAGGTAGTGAAATTTCTGCT;TCAACCGAGACAACCCTCTG	-0.57;-0.39;0.08;0.15
Usp5	-1.95347	TTTGTAGGCTACATACACCT;CCTACATCTTATCAACATGG;ATGGATGCAGCCCTTAACAA;AGACGTGTATTCTTACGACG	-3.51;-2.32;-1.54;-0.44
Usp7	-2.09911	AGATTTCGCACAAAACACGG;GTGTAAGTTCGATGATGACG;AGATGTATGATCCTAAAACC;AGGAAATGACATGTACGACG	-3.05;-2.15;-1.88;-1.32
Rpl38	-2.88053	ACTTTCTGCTGACAGCCCGG;TGTCAAGATCAAGAAGAACA;CAGCAGGTACCTTTACACCC;GTTACAGCCTCGGAAAATTG	-3.77;-2.91;-2.83;-2.01
Rpl39	-1.61256	AAAATCGCCCTATTCCTCAG;TGGCCAGGAATCGCTTGATT;TTTCCGAATCAAGCGATTCC;TGAAAACTGGTAACAAAATC	-2.45;-2.01;-1.1;-0.9
Rpl36	-2.57051	CAAACACACCAAGTTCGTGC;GCGGCTTCGCACCCTACGAG;GAGACACAGCCGGCGACGCG;GACATGATCCGGGAGGTGTG	-3.57;-2.88;-2.1;-1.72
Rpl37	-2.75009	CTTACACTTCCTCTTGCGCT;CACAAGTCGACTTCTGAAGG;ATTAGATAACTGGAGTGCCA;AAGTCGACTTGTGGCAAGTG	-3.44;-3.17;-3.08;-1.31
Rpl34	-3.02415	CTTCCTAGGTCTCGAACCCC;AGCGTTTGACATACCGCCGT;TTCTACAGGTTCGTGCTGTG;AAAGCACCTAAATCTGCATG	-3.36;-3.04;-3.04;-2.66
Rpl35	-3.00364	GAAACAACTGGACGATCTGA;CTCAAGGCCCACTTACATCT;CGGGTCGCCAAAGTGACAGG;ATTAAGGCTCGGGACCTGCG	-3.53;-2.93;-2.85;-2.71
Rpl32	-2.53796	TGTGTCTTCAGCGAAACTGG;CCACAATGTCAAGGAGCTGG;ACCAAGCACATGCTGCCCAG;GAGGCATTGACAACAGGGTG	-3.63;-3.0;-2.82;-0.71
Rpl30	-2.46052	TCCCTCCATTACCTCAAAGC;ACTGGGGTCCATCACTACAG;AAAAGTGGGAAGTACGTGCT;TGCATTGTAGAAAAAGTCTC	-3.31;-2.9;-2.79;-0.84
Rpl31	-2.93584	CGCCCGGTACTCACACTCCA;GGGCCGTTCTGCCATCAACG;ACTTCAGTACCTTATTCCCT;GCTTCAAGAAGCGTGCTCCT	-3.53;-3.41;-3.19;-1.61
Cd302	-0.303123	AAATATGACATTCGACAAGT;ACTTTGCAAAAGCGATGGAA;ACAGTGCACTGACCACGGTA;GAGGACCTAGTTGATACCTG	-1.85;-0.4;0.12;0.92
Fam13b	0.00279734	CTACGATGAGATAATACTGG;CTTCGGCAGAGATACGACAG;AGAGCCTTGTAGTGACCACG;TGACAGAGCTTACGAAATTG	-0.6;-0.32;0.38;0.56
Fam13c	-0.13027	AACTCAGCAGGACTTACATG;GAGGTCTTCTGAGGTACCGT;GGAGTGCTGAGAACCAGTAT;GAGCAAGGGAGTACGCCCAA	-0.8;-0.03;0.08;0.23
Fam13a	-0.043409	CCCATAGGCATAGAACCTGG;GTCCTACGATGACGAGCAAG;ACTTCGTTGCCGTGTCCTGG;GCTGCCTTATCACTGTGGGA	-1.54;0.12;0.48;0.76
Bcas2	-0.479125	TTCAAAGGCAGAATAATCCG;CTGTTCTCGTTCTTAGGCGG;AAAAAAATGACATTACTGCA;GATTCTCGATCCGGACCGCC	-1.32;-0.32;-0.29;0.01
Bcas3	-0.0136013	TCGTGGTTTGCAAACAACGC;AGATCCACACAGCAGTACGG;GCGTCACTACCATCAAGCTG;AAACGTGGGACGTACCCCGG	-0.51;-0.04;0.21;0.29
Bcas1	0.268687	ATAGTCGACAGCGAGCAGAG;ATAGTGTTGAATTACACGAG;TAAAGGAGAGTCCTAGCCTG;AAGGACCCAGAAGACACGGT	-0.5;-0.04;0.67;0.94
Gm8369	0.07284	AGTGAAAACTACAAAAAGCC;TAGCAATGGTTGAAGTGTCG;TTCCTGCTGTAACTCCAGAG;ATCTTACTGGTTCCAATTTG	-0.81;-0.1;0.45;0.75
Mlycd	0.705513	CCGCACAGCCGACGTCCCCG;GACTTCGTGAGCTTCTACGG;CTCCGACTGAAACCGAGGAG;TGGAAGAGGCCGCGATACCG	0.46;0.6;0.85;0.91
Rpl3l	-0.126638	TGATGTCATTGCTGTCACGA;GGCTACGTAGCCACTCCGAG;ATGGAGATTCAGCTGAATGG;GTGACTCACTGAGTCCGGGT	-0.51;-0.3;-0.13;0.44
Ttbk2	0.156102	AAATGATCGTTTCAACTACG;GGACACGAATTGGTGAACCA;GAGGGTGAACTAGCTAGCGG;TTTATTGTAGCCTCGTGCTG	-0.42;-0.03;0.49;0.58
Ttbk1	0.413194	GCGGTCTCTATGCTACCGGA;AAGGCCATTCACCTCGAACG;GTTCTTGTGAGCATTGACCG;GTGTGCATACCACGTCCACG	0.16;0.18;0.53;0.78
Ncor2	0.427782	GCATAGAGAACAATCCGCGA;GCCATCTCGACTGTCCAAGG;TACCGACTGAGCCCCCACGC;GCTACCACACCCTCGTGAGT	-1.05;0.76;0.85;1.15
Ncor1	0.190281	CCCTACCAAAGCCGACTCCG;ATATGCCGAGCATTACCCAG;GGCTTCACGGAAACCCCGTG;GGGCCTAGCAAACTACCCCG	-0.15;-0.1;0.2;0.81
Nkiras2	-0.113743	CTTGTTGCCAAGGACCACGA;TGAGATGATCGAGACCCAGG;GTGCGTTTCTATGATACACG;GTAGACCAGGACGTAGCCAT	-1.31;-0.5;0.65;0.71
Gkn1	-0.420066	CATTGTGCACAGAATGAACA;AGACTTACGTAAGCAAAACC;GTTCCTTGACCATTGTATCG;CATCAATGGTGTGCACAACG	-1.16;-0.91;-0.02;0.41
Gkn2	-0.463346	ATGCTTATAGTCAAAAATCG;CGACTCCCCAGAGTATACCT;AGCCTGTTACGTCATCAAGA;TTCGTCCCAAGCAAAAATGG	-1.29;-0.52;-0.51;0.47
Gkn3	-0.140284	CACTAGCGACAGTTATCCTC;AGCGTTCAGAGTGAATGGGA;GGTCACTACCCACCTACTCG;AAGTTTGGATGATATTACCC	-1.15;-0.62;0.39;0.82
Magohb	-0.517117	TATGCCCGACGTAGTAGCGA;TTTGGAGTTCGAGTTTCGGC;CAAAAGAGGACGACGCTCTG;GGAACTTGAAATCGTAATTG	-1.32;-1.01;-0.72;0.98
Nkiras1	-0.39476	TAAGTTCAAAGACAAAAAGG;CATCTGTAGAGACAGACCGT;CAGAAGCTCCACTCTTTGGA;GATGGAAGACTGTGAAACGC	-1.98;-0.44;0.02;0.82
Ppme1	-0.315805	TGCCCAATCAGCATGACTGG;ACTCAAAGTACTGACTCCAT;GCTATTAAGTGCATCCATGG;GGTCGGCCAAGTCAAACAGT	-0.78;-0.47;-0.44;0.42
Iqca1l	0.528528	ATATCAAACAGGGACGGCAT;AGGGACCCGACATGAAGGAG;TTCTAGTGCAAAGTGCTGAG;ATCTACTACCTACCGGTCTG	0.0;0.56;0.76;0.8
Gm6358	-1.9157	GGAGGCCTGGGCTATGGCTA;GGCTATGGCTGTGGCTATGG;CACAGCCATAGCCATAGCCT	-2.2;-2.17;-1.38
Gltpd2	0.161584	AGATAGCGAAGGGAATTGCA;AAGTAGCGTTCGAGAGCCCG;TCCCTGTCTAGGGCCTCATG;AAGGCGAAGACAGTGCCAAG	-0.38;0.11;0.3;0.62
Cep164	0.0204856	AGAGAAAGGACTCACCAGCG;CCTTCGAGACAAGCGCCAGG;ACTATTTCAACTTTGACACG;GCTCCCGAGTTGGACCCCGG	-0.33;-0.22;0.11;0.53
Cep162	-0.231537	GTCTACAAAAGCGACTACAG;TCTTCTAGCAGAATTACGGG;ATGAGAGTGTGGTTCTACAC;CACAGGCGAACCAAGAATTG	-1.4;-0.18;-0.07;0.71
Gm14017	-2.015	TTTGGCGTCTACGACAACAT;AGCCTTACGAAGGCCAACCG	-2.38;-1.65
Fam234b	0.647655	GCAGAGCAATACCAGAACCA;CTTGTCGGGTTGTAATCAGG;CCTGTGAAGTATAACATCGT;GTCTGGCAGCACCACAACCG	0.15;0.56;0.79;1.09
Lrriq1	-0.34374	TGAGCAATCCAGGTACACGA;AGTGTAGAGAGACTACAACC;AGGTAATGATCAGTGGCGAG;GTGTGAATGAACAGTACCCG	-1.86;-0.46;0.3;0.65
Fam234a	-1.17252	GCAGCATCCAACATACCACA;CTGTCCATCCAGCAACACGC;TGGCATGGCACACTTTACAA;AAAGGAAAAATGCCACTGTG	-2.09;-1.66;-0.67;-0.27
Lrriq4	0.0941618	GAGACAAGAACATTTACCCA;CCAGGTGCCCGATATCTCCG;AGGGATTTGCAAATGCCGGT;GAAAGCAAGCTTATGCTCGG	-0.28;0.13;0.23;0.3
Ythdc1	-1.72025	TCTTCAGAATCACACCATGG;ACTCTTGTAAGGTTCTCTAG;TGATTATGACACCCGAAGTG;TCTGCATCAGAGTCATATGC	-3.29;-1.85;-0.92;-0.83
Vmn2r84	-0.442247	CATGACAGAGAATACCAAAG;TTGAAGAATGTGCTCATGGT;GGACATAGGGAAAATGGTCA;GGGCATATTTAGGTGCTCGG	-1.46;-1.0;0.11;0.58
Vmn2r85	-0.521824	GCATTTCTGAGTCAATACTG;GTCACACTGCACATTGAGGA;AATGTGTTCATGGTAAGTGT;GGGTATATTTAGGTGCTCAG	-0.97;-0.65;-0.38;-0.08
Vmn2r86	-0.884924	GGCTCTCTTGCTGAAAACTA;CATGACAGAGAATACCAAAG;ACATTTCTCAGTCAATACTG;GGGTATATTTAGGTGCTCGG;GGAGATTTGCAAAGTGAGTG;ACATGTCACACTGCAAATGG	-1.59;-1.46;-1.39;-0.88;-0.1;0.11
Vmn2r87	0.240155	GGGTATATTTAGGTGCTCGG;GGACATAGGGAAACCGGTCA;TAGGTTTCTCCATTGTCCAA;GATTTAGAATGGGTCACAGG	-0.88;0.04;0.36;1.45
Vmn2r80	-0.0848181	ATCATCACAGATGACCACAG;GAAATACTTGCCTATGGACA;CTTTCACAATTAGTGAAAGT;TATGATAGAATTATCCCATG	-1.63;0.05;0.57;0.67
Vmn2r82	0.281585	TATGTTAGAATTATCCCATG;TATATGATTAACTGGCCCAT;GTCCTATCAATATTTGACTG;ATAAATTACAATCACGTCTG	-0.28;0.27;0.27;0.86
Vmn2r83	-0.103977	ATCTTCAAAGGAATGCTCTG;CTGGCCCATAGGATTTACTG;AACCACAGGCTTATAAGGAT;GGAAACAGTATCATTGTGGG	-0.29;-0.27;-0.08;0.23
Tinf2	-2.3009	CCGGTAGCAAACCAAGCCGG;AGTGCTCTACGCGGCGACGG;CAAAGGCGTGCCATAAAGAG;CCAAAGGGGCCAGATTAAAG	-3.34;-2.86;-1.86;-1.15
Vmn2r88	-0.275186	TTGGTTTATCAACTGCCCCA;GTCATCTCAGATGATGACAA;ACATGCCACACTACACACAG;CTTGTGGAAAGTTCCAAATG	-0.61;-0.54;-0.5;0.55
Vmn2r89	-0.924364	TAGGTTTATCAATTACCCAA;CACACATTTATCCCATGGCA;AATGGATTCTTCAATACCAA;TGTGGTGTGCAAAAGTGATA	-1.73;-1.21;-0.6;-0.16
Egf	-0.0500729	TCACCGTAACAGATATGACA;TGTTCATCGCCTGACAATGG;AGACTGTTCTGGACGGACGT;GTGTCACAAAGGATGGATGG	-1.13;-0.09;0.17;0.84
Slc4a11	0.506627	ATCCAAAAGCAATGGTCGGT;AGCGGTTTAGCATAGTTCGG;GGCTGGCGTTGAGTGCAGTG;CTGCTGTCAGATACCATCCA	0.45;0.5;0.52;0.56
Slc4a10	0.0703214	AGAGAACATCTGGCACGTAG;TGAGATTTGCTGGCGTGAAG;TTCCTGATACCAAGTCATTG;CACGATGCCTGTGACGACGA	-1.0;0.14;0.17;0.97
4930519G04Rik	-0.614827	CAACCTACTCGGGTATTCGA;CATGTACTTCTGGATATACC;CAGATGAAGACGTTCCTCAG;CCTCCTACCAGATTCCAACA	-1.63;-1.46;-0.02;0.65
1700013D24Rik	0.0847122	CCAGCACACCAAGAAATGTA;AAACATTGCGCAGAGAACAT;ATGAAGATGAACCATCTGGG;GCAAACACCACATAGAGCCA	-0.33;-0.08;0.33;0.42
Ptprz1	0.153996	GTCCGAAGCAGCACGAGTAG;CATGTGATTATAGTGAGTCG;ATCTACAAGAAATGCCCCAG;ATGGCGTCATAAACGACCCG	-0.28;-0.26;0.34;0.81
Pold1	-2.53	TTCACAAACTCATCCCCAGT;AGGCGCTCTAGTAGTCGGAG;GCCATCAGCCGGGACCAGCG;CGCACCCTACGAAGCCAACG	-3.52;-3.09;-2.13;-1.38
Pold2	-2.1337	ATACCTTACCAAGAAAACCC;CCACTTGACACAGACAGGTG;GCTCTGCGAAAGATGACGGG;GGGTGGATATATTTGCTCCG	-3.0;-2.47;-1.79;-1.27
Pold3	-1.56335	GTGGCTAAGCTATACACTAG;AAAGCTATGCTAAAGGACAG;CCAGCAGAAAGTCCGAGCCT;GAGCTGACTACCAATGGCCA	-2.94;-1.58;-1.1;-0.64
Pold4	-0.16459	TCCTGATGGCAGGTATCACA;CCTATCCTGTTGTGAAGAAG;TCTCCCTTGCTGTGCCCAGG;TGTACAAGGCCCATACTGCC	-0.43;-0.24;-0.03;0.03
Hdac1	-0.618142	TGATCCTAGGTACCACCAGA;GCAGCGAGCAACATTCCGGA;TAAAGGGAGTTCTCACCCGT;CTTACCGACAGAGCCTCCCG	-0.94;-0.62;-0.48;-0.43
Hdac3	-1.61859	GCGGCACATGTCATGCTGGG;GCACATTGAGACAATAGTAG;CAATGTAGAGCACCCGAGGG;GAGCCTTAATGCCTTCAACG	-2.22;-1.81;-1.25;-1.19
Hdac2	-0.711462	TCATCTATACCATCTCTCAT;ATCTTCTCCGACGTTAACTG;TGAGTCATCCGGATTCTATG;ACTTGATATACTCATCGCTG	-1.56;-0.76;-0.61;0.09
Hdac5	0.0347677	AACTCTGGTCCAAAGAAGCG;GCCGGGCGCACTGTTACACA;CTTTCTGTAGAGCCTTCCCG;CGTGCCCTGTACTTACGGTG	-0.34;-0.24;0.04;0.68
Hdac4	-1.11924	TCACTTACCCATACCAGTAG;TGTGGCTGCCAAATGACACA;CTTCTGTCTACAGACGAGCT;CCTACCTAGATCGGCTACCT	-2.1;-1.98;-0.67;0.28
Itch	-0.453672	AAAACATAATTTACTCGTAG;ACAACACTCGGATTACTCAG;TCCCGCACATAGGCTATCTG;GCCAAGCTCCCCTACCACCT	-1.43;-1.31;0.12;0.8
Hdac6	0.503493	CCTGAGACAAGAGTGCCAGT;TCCATCCACCGATATGAACA;TCCCTGCACCGGTATGACCG;ATGATGCGTAAGATGCGCTG	0.21;0.48;0.65;0.67
Hdac9	-0.173317	GGTCCCAGTTCACCAAACAA;GAGACACAGATGCTCAGACA;AGCAGCACGAGAATTTGACA;CAATGGAAAGAATCATTCCG	-0.41;-0.27;-0.1;0.09
Hdac8	0.195587	GTTGCAGATAGGCATCAGTG;GACTCCATAGAATATGGACT;CTTCCCGTCAATCAGGCACT;CCGTTTGGGGACCTTCACAA	-0.35;0.23;0.4;0.5
Gmpr	-0.00859048	AAAATGCTCTGAATACCCAT;AATGATGGGAATCCCTGAGT;CAGCCTCAAGAGCCGATCCG;GCGGGCAGAATGATCTTGAG	-1.22;-0.06;0.32;0.92
Gmps	-2.24182	AGGGCTATTATCATATCTGG;GAATGAGCAGCATTTATCAC;AGTGCGTCCCTTGTTGCCAG;AAATATGACAACAAGTCCTG	-3.11;-1.99;-1.96;-1.92
1110032F04Rik	-0.0572296	CACGCCTTTCTGGACAACGT;CACCTCGTCGCGCAGCAGAG;GACTCACTGTTGGATAGTGG;GGCCACGCGGGTACCTGCGT	-0.47;-0.12;0.16;0.2
mt-Rnr2	0.45105	AAATTGACCTTTCAGTGAAG	0.45
Gm13680	-2.96179	TGAGGACCAGTGGATGGACG;CGTCTGATCTATGACACCAA	-3.28;-2.65
Pvr	0.198926	GAAGACAGCCACAAGAGCGT;AACTTAAGTGTAGAAGACGA;GCTAAATGCATCTCTGCCAA;AGGTCAGGGTCAAGTTAGTG	-0.26;-0.18;0.42;0.81
4732471J01Rik	0.140609	AGAGCGGATATGCCTTGCAG	0.14
Lix1l	0.236299	AAGCTGACAACCCAAATACG;AGCTTCGCCAAGCACACGCA;GAGGCACTTTGCGAGCGCTG;CAGCACCGCAGGGCTACCCG	-0.4;-0.1;0.48;0.96
Ikzf5	-0.577728	GAGCACATCAGGATCCACAC;ACACTTGAGCTTCCCATCGA;GAAGCAGAGACTCTTCAGGG;GTTCACATGATGCGTCTGCT	-2.4;-0.09;0.03;0.14
Ikzf4	-0.335558	CTACAAACAGCAAAGTACCC;AAGTTGGCCGTTCAGTCGAT;GAGCCCTTAGGCTACTGCGA;CAGATGCTCTGTACCCACAA	-1.3;-0.49;0.19;0.26
Ikzf1	-0.40584	AGAAACTAACCACAACGAGA;CAGAACTCCAAGAGTGATCG;GATGGCCTGGTCCATCACGT;GTTGGTAAGCCTCACAAATG	-1.78;-0.37;0.08;0.44
Ikzf3	-0.957127	TCATATTAAACTGCACACGG;TAACGCCATCAGCTATCTAG;ACCTCATGAGATAGAAAACG;GACAACAGCAGACCAACCGG	-1.84;-1.58;-0.38;-0.03
Ikzf2	-0.508974	TATGAACTTAACATATGAGA;CCTAATTGAGAGCAGCGAGG;GGGTAAAAGAAGCTCCGCAC;GCTTGTCATGTGACTTGGCG	-2.54;-0.31;0.39;0.43
H2afv	-0.125045	ACGAGACACCGCCTTAGCCT;TGTGAGGTACTCCAGAATTG;TGCGAGTCTTCAAGTGTCTG;GCCCACCCGTCCATGGCTTG	-0.91;-0.27;-0.18;0.86
Gm8152	-3.42692	CTCAGAACAGAACAAGAAGA	-3.43
Mbtd1	-0.858395	TTCTTGACCATCCAATATGG;TGAGGCCACTCACTTCTAGG;ATGTCGAACAAGAGTAGCAG;CCATGCCAGATTTACCATCT	-1.35;-1.06;-0.94;-0.08
H2afx	-1.38854	CCGCGTTGCCCGCCAGCTCC;GCCTACAGGGAACTGAAGGC;GCTCCAGGATCTCGGCAGTG;ACGCGGCAAGACCGGCGGCA;CGCCCACGCGCTCGGCGTAG	-2.99;-2.48;-1.75;-0.31;0.59
H2afz	-2.32888	GATGGCTGCGCTGTACACAG;CATAAAAATCAAGTTCCCTG;CGTACTCCCGCTTACCTCTG;GGCTGGAAAGGACTCCGGAA	-3.18;-3.03;-2.41;-0.7
Gm13359	-0.718436	GTTGCAGAAAGACCTAGAAG	-0.72
Pigyl	-0.104873	GGGATGAGGACGGTCATGGT;CCACGGAGGCGGAGTAGAGC;AGGCCTGCCAGCGAGACCAG;TGGGAAGCCTTCCTCCACGG	-1.18;-0.15;0.28;0.63
Theg	0.0417967	CTGGACCGAGCGATTTATCG;GCTGTTGTAAGGGCTATGCC;GATGTTATTGCGAACCTTCG;AGGTGGAAGTGGTTGAAATG	-0.34;0.01;0.16;0.34
Gm21083	-2.01625	CCTCTTGTTCATGGATCCCT;AGAGTAATGAAGGACGAAGG;GATGGGAGAGAGACCAGAGA;GGAGGCCCAAGAGAACAAGC;GGATGGGAGAGAGACCAGAG;GAGTAATGAAGGACGAAGGA;AGAAGGAGACACATTTCTAT;CTTGCTTATGACAGGTACAG;GAAGTTGATGACATTGCAGC;CACCAAACATTGGTGAATGA	-3.38;-3.34;-2.84;-2.79;-2.54;-2.34;-2.26;-2.0;0.35;0.97
2022-09-10	-0.614708	CATTATACCACTTATTGCCA;AAAGCCCACTGTATTTACAA;ACACATGGATACGAGAGTCA;TATCCTTGGGGTATCGTACA	-1.41;-0.73;-0.4;0.08
Fgf18	0.377126	GATCCGGACTTGACTCCCGA;GCAGCCTGATGGTACTAGCA;GGGCTCGAGATGATGTGAGT;GGCCGTAGGATCAGTGCCCG	-0.09;0.06;0.53;1.01
Fgf13	-0.288542	ACCAAACTATACAGCCGACA;CGAGGGATACTTGTACACCT;GGAGCCAAAGAGTTTGACCC;CATTGATGGCACCAAAGACG	-1.08;-0.39;0.12;0.2
Fgf12	-0.185989	CTCTTCAATCTAATTCCTGT;TGGTACCATTGATGGGACCA;GAGGACGTGCCTCTCACACA;AGCTGAAAGGGATTGTGACA	-1.9;0.15;0.2;0.8
Fgf11	0.0714726	GGGCCGCGGTCCTGTCGCGT;CAAAGTGACTTGGTACCGCG;TGAGGGGCTATTGTACAGCT;TCCCATCGGGATTCGCCTGG	-0.28;-0.15;0.07;0.64
Fgf10	0.303109	TGTCCTGGAGATAACATCAG;AGGAGAACAGCCTTCTCCAG;TTTCTCACGATTGAGAAGAA;CCAGTGCGGGAAGGCATGTG	-0.13;0.18;0.4;0.77
Fgf17	0.0353458	GTGAATACCAGCTCTACAGC;TCGCATCTCTGCCACCGCAG;CTCTGCTGTCAAACACAGGT;AACCAGTACGTGAGGGACCA	-0.75;-0.05;0.05;0.89
Fgf16	0.593745	CGGCCGGGTCCTCACCGAAG;TACCTAGGAATGAATGAGCG;CAGACTTCGCCCACCTGAAG;AGGCGCTCGTTCAGGAAACC	0.07;0.09;0.53;1.7
Fgf15	0.0959101	TCGTCTTCAGAGCGACCGCG;TCCAAAGATTCGCTACTCGG;GCGGTACCTCTGCATGAGCG;AGCCGTCGCTCCGGATTCGG	-0.35;-0.23;0.22;0.75
Fgf14	-0.124641	ATTAGTGCATCACTTACTGA;GCCTTGCCTGCAATATAACC;TGGAGCTCTCGATGGAACCA;CAACAACGCGCAGTCCCACT	-0.81;-0.64;0.3;0.65
Prss46	-0.794936	TCAGACCAACATAACCTGCA;CCGCTGCACACTGCTTACAA;ACAATGAAATCTGCAATCAT;TTGGCTTTAAATTGAATGAG	-1.6;-1.03;-0.35;-0.2
Prss44	-0.585182	GCACTCACCCATATACACAG;CATCTAGGCCATTCTCTGAG;GTAAATGCCATCGAATCAAG;ACAACCTGGGACGCTATGCT	-2.37;-0.4;-0.27;0.69
Prss45	0.229566	GAGAACTACACCGAACCAGG;AAGGAGTACTCAGTGATGTT;CCACCCAGCTTCGATCAATG;TGGACCCTGAAGATTCCCGT	-0.58;0.22;0.31;0.97
Prss42	0.325634	GTTCCCTCATCAATTCCCAG;TGGGGAAAACTAGTGCCAGG;TGTTAGTGGTGAAATTCACA;AGGGTTTAGTGAAGCCCCGA	-1.0;-0.11;1.17;1.24
Prss43	0.242575	TGAAGGGTGCGAAATACTCA;TTGCGGCCATAGAATTACAG;CCGCAGTCAACACCCATCGG;TGAGCGAGGAGTAATTCACG	-0.28;-0.08;0.46;0.87
Faap100	-0.617625	TCTGTGTGGTAGACTTGACT;GGCTAACCCAGAAGTAACCA;AGCTGTTGACCAACGCAACA;ACAGGACGTAGAGTGCCCTG	-0.89;-0.73;-0.63;-0.22
Prss41	0.124903	TCTCACTCAAATCCTCCTGA;GGCCTATTCTGGACGGTACA;CTGGTGCTGGGACGTAAAGG;GGGACCGAGTGTCATTCCGG	-0.33;-0.09;0.21;0.71
Prss48	0.0871051	ACAATGCGTCCAGTGTGTAC;AATGGGTGTAGTCAAAACGC;ACTGTATAGAAAACTGTACC;AGTGCCTGTCATTTCCAGTG	-0.22;-0.05;0.09;0.52
Phc1	0.457207	GGGTACCGACAACTTGCACG;GCTCATCCTGATGCCTAATG;ACAGCACATGTGGTAAAGGG;CTCAACCTTAGTCAAGCCGG	0.25;0.38;0.54;0.65
Phc3	0.0555323	TGTATCCCACTCCCAAACCA;CACCAGTTAATAGCACCAGG;ACGGTGACGACGAGACAACA;GGTCGCGATGGGAATTGGAG	-0.4;-0.37;-0.04;1.03
Phc2	-0.480569	CCACTGTACACAGAAATCTG;CCAAGCACAGATGTACCTCA;AGGAGATGGTAACTGCAACA;TGGTGAGAATAAACCACCAC	-0.9;-0.72;-0.48;0.18
LOC115489950	-1.98831	TCTACCATTAGTCTCAATCA;ATCCATCTTAGTATTCATCA;GAAATTCACTACATTTGTAA;TGAAAAAAGACAATATTGCA;CATACGTGGAAAGAATGGGA;TCAGAAAATCATTGCATACG	-2.74;-2.61;-2.19;-2.16;-2.1;-0.14
Igsf9	0.405414	GGGCTGGTCTATAAAAGCCG;ACTGACGTAGCTATCAGCGA;CAATGCAGAAGTACCCCCCG;ACGTAATCGGGGTCAATTCG	0.05;0.06;0.62;0.89
Golt1b	-1.90794	ACCGCCCAGGAAAAACCCAG;GCCGGCCACAAACAGAACCT;TATGTTGCAGAAATTGGCAT;TCGAAGATCATGCCTATCAG	-2.65;-2.07;-1.96;-0.95
Golt1a	-0.342651	TTCCAACGGCACAAGCTCAA;ATTTCCAAAAGCCAAGAGCA;AGTACAGGAGAATCCCAAAG;GCACAATGGCGACACCCCCC	-2.16;-0.21;0.2;0.8
Chmp3	-2.05714	ATGGGCATGAAGAACCAACT;AGTGACCATTCATTAACCTG;TATTCAGGCTGGAATCATAG;GTTGTTGACAGGCAAATAAG	-2.85;-2.36;-1.62;-1.4
Chmp7	-0.917067	CTCGCGACTCCTCTTAAAGG;GGTATCTCCTGTGAACGACG;GTATAGGCGATACACCTCCT;TTAGAAAGAGTCCACTTGAG	-2.12;-1.13;-0.39;-0.03
Chmp6	-2.36836	CCGAGTCACCGAACAGGACA;TCAGGTGATGTCCATAGAGG;GTGATGGAGGGGCTACAGGT;ACCGGGAGCAACTGCTCGAT	-2.75;-2.57;-2.48;-1.67
Chmp5	-0.344515	TTACACCATCCAGTCACTAA;ATAGGACTTACAAGACCAGC;GGCCCAACAGTCCTTTAACA;CAGTCCGTCAAGCTAGGTGG	-1.65;-0.34;-0.16;0.77
Recql5	-0.508528	TGAACTGCACATCATAGAAG;CATTCCTAGAGTAATACAGG;GCTCATTGCGTTTCCCAGTG;GATCCTGAGCTGTATGAGGG	-1.69;-0.93;0.22;0.36
Recql4	-1.61957	CAATCTGAAAAACACAACAC;GACACCTCTCTAACCAACCA;AGAGACTTTCCAGCACCCGT;GGGGCTCTGTGACAAAACCT	-2.74;-2.31;-1.16;-0.27
Gcnt7	0.301991	CCTATGTTATACATGCTCCG;TCATCTATGACATCAGAACC;GACATAGTGCCATTGAAATG;GCAGAATTGAGCGATTTGGG	-0.44;0.13;0.67;0.85
Gcnt1	-0.27967	TTTCCCTATTAAAACCAACC;CAGAGAAGGTAATTAAAGAG;TGCAATTCAAGAAGCGCCCG;GGTCAGCTTCCCATCGACAA	-1.39;-0.33;-0.03;0.63
Fam170b	0.233168	AGTTCATCAAGCGTCAGCGG;CTGAGAGTAGGACTGATACT;GGAGGAATGAGTCATCTCCG;GCCGCGCACAGTCTGCACGT	-0.43;0.24;0.46;0.67
Fam170a	-0.218599	CTCTTTGTTCATACACAGAG;CCACTAGATCAGGTTCCGGA;AACACAGGAGAAGTATTCGG;GTCGGACAGTGAACCCATTG	-0.76;-0.17;-0.1;0.15
Gcnt2	0.106372	AAGGCAACAGCTGAATTCAA;ATGACCATGACATACGCCAA;GAGATTCCACCATAGACCAC;GGGGAAGAACCTCACTCCCG	-0.88;0.19;0.24;0.88
Mark4	0.0209675	CAGACTGCGAGAGCATTCTG;AAGCGATAGAGTTCCGGCAA;GGTGGGTATGGGCTACACAC;GTGATGGAATACGCTAGCGC	-1.39;0.25;0.27;0.95
Mark1	0.597281	TCTAGGTAGAAAACCACCCG;ATTCTGGCGGTAGCATGGCG;ACGTAATGGAGTTTCTACAC;TTGGTCATGGAATACGCAAG	0.43;0.48;0.67;0.8
Mark2	0.2296	CAACGACGCTCCAGTGACCA;AGAGGTGTTTGATTACCTAG;AAGATCGGTGGATGAACGTG;GCTGGCCCTGTCCAAAAGTG	-0.08;0.12;0.18;0.7
Mark3	0.0269756	CAGTTGTGGCATATCCAAAG;TGTTGAAAACAATCGGCAAG;GTGCTGAACCCAGTTAAACG;CAGCTACTTACTTGCTACTG	-0.18;-0.18;-0.11;0.58
Nmd3	-2.69171	ATAGACCCAAATACCCTACA;AGACCTGCTTTGGAACACCT;TACTGACCTACCTTACTCAG;TAGGTTTCAACATACCTACA	-3.93;-2.71;-2.57;-1.56
Gm7600	-3.49882	GATGTTCCTAATATTGAACA;AAAATTCAAGCTAATCACTG	-3.52;-3.48
Rps15a-ps6	-2.98264	CTTTAGAACATGGCCTGATG;ATCAACAACGCTGAGAAGAG	-3.02;-2.95
Rps15a-ps7	-2.94666	ATCAACAACGCTGAGAAGAG	-2.95
Extl1	-0.224524	CGGTCGGAAGATGTCCGAGG;AGTTATCCATACCACCCTAG;CTCCCCAGCCAGGATCGTAG;AGGTGGCAGATCGGTGACCA	-0.6;-0.54;-0.15;0.38
Extl2	-0.117615	GATCAAATCCCCGAGCAAGT;TCCGGGATCTACAGTTACGG;CAAAATGAGAAACCGACTCC;GAGTCTGCACAAGGTGATCG	-1.38;0.14;0.14;0.64
Extl3	-0.389801	ATTGCGGAGGTATTTAGGTG;CCACACAGTGCCCACTCAGT;TCAGACATAGCATGGACAAG;GCCCAAGCCTCGCGTCACAG	-1.19;-0.89;0.1;0.42
Tia1	-0.454488	GGAACTCCACAAAACAGTAT;CAAATGAGTATCCTTTATCT;CAAACAGCTGTCATATGATG;TGGTAAAAGACATGGCTACC	-1.53;-0.41;-0.17;0.3
Tmem160	0.367942	GACCTGTCTCATGTGCCTTG;ACTTCTGTCATCCGGCATTG;TGCCAGACCCACCGCATAGG;AGCGTCCGCGCGATCCAGCT	-0.14;0.22;0.46;0.93
Tmem163	-0.426419	GCTACTTACTGCAAACCCGA;TCTGTCATCTATATGCATAG;AGCGACGGGTTGGAAGACCG;CCTCTGGCGTTACAGCAATG	-2.03;-0.9;0.39;0.84
Tmem165	0.390605	GGCATTAGAATGCTTCGGGA;ACATAGTATGTATACACCCT;GTCATCATAGTGTCCGAACT;GCAGCTGCCCAGACGAATCT	-0.05;-0.05;0.19;1.47
Tmem164	0.558683	AGCCCTGTGCCTGATCTTCG;TGACGGTAGCTCCCGGACAT;CCAGCCGGGTATTTACCACG;CCAGCATGCTATGCTCTACG	0.23;0.51;0.54;0.95
Tmem167	-0.736676	CAGACTCTGAAAATTGAAAA;TTATTTCTGTCCAGGATGCT;ATGTGCTTATATCCGATCCC;TCCTGGACAGAAATAAAACT	-2.14;-0.66;-0.24;0.1
Tmem169	0.0407209	CTAACCGGGACCATCACACG;GCCCCCACCACGGCTCACTG;AGATGATGATGGATTCCGGG;AGTGTCCAGAGGACCACGTG	-0.31;-0.22;-0.18;0.87
Tmem168	-0.798896	TGGCGATCCCAAGAACAAAG;TGAACTTGGCAACTGCTTAG;TGATCCTGGCTAGATAGCCG;TTAGTAAAGTAGGCCGATGG	-2.45;-0.68;-0.15;0.09
Gm3739	-2.29018	TGAATTCAGTGTTCATCCTG;AGTGCCAAGGAACAGCAGGT;CAGAAGGCTGCTGGTGGAGC;CAGTTCCTTGGAGTACTGCA;TTTGTGGATCAGCATTAAGG;ATGAAAAAGGAAGAAGGAAA;TGTGTCACTGACTCACCTGT;CTCAACTCAACGAAAACGTA;AAGGAAGAAGGAAATGGTTA;TTCTTTGTGGATCAGCATTA;AGGCTATTTCAGAAAGAGAA;GAAGGAAATGGTTATGGAGA;TCAAATCCTCATACATGTAA;AAGAACTGAAATTGGATATG	-3.29;-3.28;-3.04;-3.01;-3.0;-2.91;-2.33;-1.97;-1.91;-1.85;-1.72;-1.37;-1.35;-1.04
Tbc1d8	-0.107901	TCCTGCCGTACTCTACAAAG;TCCTCAGGCTCTGATCGCAG;AGATGGACGCTAACGCCGAG;GCTTCTGGATATCGACCCAG	-0.56;-0.23;-0.13;0.48
Tbc1d9	0.00643195	CACACACCCCGGGTACTACG;GAGTGTGAGGAACCACGACA;ACTCATAGGGACGTCTTACG;GTCTATTGGACCATTGCCTG	-1.27;-0.08;0.43;0.94
Tbc1d1	0.249229	GTTACTTAGAGTACTAGAAG;AGGTATCGTCGAACTCGGAG;CTTACCTTCATATCTGCTCG;GCAGGCCACCATATTCGAGG	-0.59;0.29;0.53;0.77
Tbc1d2	0.445388	TGCGGTCTTTGACTGTAAGG;AAAACACCCACTGGACTCGT;GTGGAAGACTCGCCTCAGGG;GCTGGTGATCATCCTACACA	-0.12;0.42;0.61;0.86
Tbc1d4	0.479355	TGAGCCCGTCTTCGGAACTG;CAGATGTACTGGCTCAGCCC;GGCAGGCCATCTGTGACTCG;GAGGACCCACGTGCACATCG	-0.24;-0.09;0.78;1.47
Tbc1d5	-0.519473	GATGCATTATCCAATCATCG;TGGCAACAGTAAGACAGAAG;TGCTCCCCTGAATATACACA;GCACATCACTAACCCAAGGA	-1.03;-0.84;-0.21;0.01
Tbc1d7	0.392163	TGGGAATGAGTGTCATGGTG;GCAGTTAAATAACAAGTACA;CCAACGCGCGATACATGGAT;GCATGTATCAGCTTGAATCG	-0.02;0.19;0.2;1.2
Spata48	-0.471387	TTCAGTATACAAACTCAAGC;AAGGTCACTTACGTATACAG;AAGTTTAGAGTGCCTAGGAC;ACAGACTTGATATCTCCGTA	-1.63;-0.98;0.2;0.52
Spata45	-0.413092	GGCAACGAAGAGAAGACACA;TTTGATATGCATGCAAGCTA;GCGCGAGTCCTACTGCCTGG;AAGATGACATCCATGAACAA	-0.86;-0.65;-0.11;-0.04
Spata46	0.118923	TATGTCCGGAAAAGCACTCA;CTTGGGGGACACCCAGAATG;GCCAACAGGAAATCCAAGCA;GCATACGAAGTAGCTGTAAG	-0.57;-0.32;0.48;0.88
2010315B03Rik	-0.55702	GATGTGGTAAAGTCTTTGCA;CAGATGACCATGCCTTGCAA;TATAGCAGTGAGGTTCTCGT;ATTTGAAGATGCTTACGGCA	-2.14;-0.04;-0.03;-0.01
Akirin2	-1.65911	TGTGAATCGGAAGTACAACC;AATTCTGTACAACATAAAAC;CCACATGCATTTCTCATCAG;TCCATCCGGAGATACTTCTG	-2.47;-2.37;-0.9;-0.89
Akirin1	-0.105905	GGCGTCTGCATCTGAAGCGG;TGGTGCAGTAAGTGCCGAGG;GAGCGTCGTCTTCCAACTCC;GTCGCCGCTTCGGGGAACCG	-0.87;0.05;0.11;0.28
Olfr247	-0.126406	ACCCACTACATTACACTCTG;CCTCTGCACTGAATTCACAT;ACACTCTGTCAGCCCCAAGA;TGTGGTAAAATTAGCTTGTG;TGCTGATATAGCACATCTCT;GATGTGCTATATCAGCAGTG;ACAGCTCAAGACCATAAGTG	-0.98;-0.97;-0.41;-0.08;0.35;0.53;0.67
Ap3m1	-0.408997	AAAACTTACCATGAAAGAGA;AATTCAATTACAAAGAGAGG;TGAGGTGTTGAAATGACAGG;ATGTTAGATTCAGTAGCCAG	-1.61;-0.71;0.34;0.34
Ap3m2	-0.59822	GGTGAAATATACCAACAACG;CATCCCGGTCAGCTTAACAC;ACTGTCCGGAGAATAGTGGG;GGCCCAAGAGAGAGCTACCG	-1.56;-0.67;-0.64;0.48
Limd2	0.244159	CTGGACACCTACATGAGAGG;GGCAGTTATGCTGCAATGCA;GAGCGCACCTGAGTTTGGTG;GTGGCAGCAGCACGGTACAG	-0.29;0.19;0.23;0.85
Limd1	-0.0917416	CAGAATTTGAGGAAACTCGA;AGGTTCCAGACTACTGTCAG;GCAGAAGCCCGGTCAACGGT;ACCGAGGTTCACTCGCTGAG	-1.69;0.18;0.33;0.82
Nop58	-2.36105	GTGGGCCAATCCAAGACACA;ATGCGGTGTAGGGAATGGTA;CCAACCATGACTGTAACGTT;GCTGTCGCTGATGCTAAACT	-2.64;-2.42;-2.41;-1.97
Acsf2	-0.00717299	CCTGACTACAGTCATCTCAG;TGAAGCTTGGAGAAGACAGG;ATGTAGCTGAGGCCTCCGAT;AACATCCAGTTCACCTCGGT	-0.51;-0.2;0.07;0.61
Nop56	-2.66257	CAGCCTGTCAGCCTTAATTG;GGGTACAACTGCCAGACTGG;TAAATTTAATGTGAACCGAG;GAGGAATGTGTGCTTAACCT	-3.64;-3.29;-2.25;-1.47
Nop53	-1.72062	CTCACACATCTCCCGAAACA;GGCCCCAGAAACAAGAAGCG;GGCTACAGGAGCGCACGACC;AGGGCAAGGTCAACCCGTAA	-2.12;-2.0;-2.0;-0.77
Sarnp	-0.243396	CAGGCCTATCTTGAAGACCA;GGTGGAGCTCCACAAGCTGA;AATCTGTCTTCTTAGGGCAT;TCACTTAGAGAATGCAGAAG	-0.67;-0.3;-0.09;0.08
Cdk13	-0.51423	TATATGGACCATGATCTGAT;CACAGTTACATAGCAAACGA;ACGTAGCCGACGCGCTCTTG;GCAGCAGTCCTTATTCCCGG	-1.45;-0.99;-0.22;0.61
Kcnip4	-0.843085	TACTCACAGTTCTTTCCACA;CTTCATTAACAACACCACTG;GCATTCGACACGGACCACAA;AGATGGCTACTGTCAGGCAT	-2.02;-1.3;-0.6;0.55
Kcnip3	-0.433665	GCGCATACCACTGAGCAAGA;GATTAAGCAGCAACGCATCA;CAGTGAACTGGAGTTATCCA;GAGCTGCAGTCCCTTTACCG	-1.49;-1.0;-0.53;1.29
Kcnip2	-0.0386332	TCCGAATCCCGAGATTTGGA;GGATGAGTTTGAACTATCCA;TCCCAGCGGAATTGTCAACG;ACTGACAGAGCCATCATGGT	-1.19;-0.02;0.47;0.59
Kcnip1	-0.162662	CAGTCCATGAAAAACTAAGG;ACAGAGTGCTTACCTTTAGA;GAACTTTACAGAGCCTGTCT;GAACTGCAAGTCTTGTACCG	-1.13;-0.18;0.24;0.42
4930447A16Rik	0.185096	TTGGAGCTATAAATTCACCA;GGTCATAAATTATTGCATGA;GCAAAGCTCTCAAGGCCCGT;CAGGGAGCCTTGCGTTGGGG	-0.4;0.02;0.08;1.04
Tpcn1	-0.311148	AGAAACACGAGGTAACTCCA;CCTCGATGAACTGCACCACG;CTGGGAGATGAATTATCAAG;CAAGCCCCGGATGAGTGCAA	-1.08;-0.4;0.05;0.17
Tpcn2	-0.143792	ACAATGAACCAGCATCCATG;AGAGGTTTCCCAGAGCGACG;GTTCCAGAAACTCTTCGATG;ATCATCTATAATCAGTTCCG	-0.62;-0.18;0.03;0.2
Gm8600	-1.18742	AAAAATTCTCCAAAACACCA;GTGATGGAGTATGCCTCAGA;GATGGGTGAGGTGTACTCCT;GGTACTTGTGGGGACATGGA;TGTCCCCACAAGTACCTCTG;ATCCTGGCTTCCCTGCAGAT;AAGATCGCATCATCAAAGTG;GGATCTGAAGATGATGGAGC;GGTGATGGAGTATGCCTCAG;GTACACCTCACCCATCTGCA;CAGCCACAGAGGTACTTGTG;ATGCTGAACACACTGGGTGA;ATCTTGTAGCTCTCCCTCTG;GTTTGCCCAGATAGTACATG	-2.78;-1.73;-1.7;-1.67;-1.34;-1.29;-1.16;-1.07;-1.01;-0.87;-0.76;-0.69;-0.43;-0.11
Gm8606	-3.31919	ATCCTCACTGGGCGCCACAG;ACAGGGTTTCGGCTGCAATG	-3.46;-3.18
Tcirg1	-0.0698198	CGCTACAGGGAAGTTAACCC;TCTCCCGAAAGCTGGCAATG;CAGCCACACTCCAACCTGAG;ACACAAGTGCCTCATCGCGG	-0.45;-0.21;-0.05;0.44
Ltbp4	0.250092	AGGCCGCTGCGACAACACCG;GGCTGATTGAAGGTCACTCG;ATTGACGAGTGTCGTGAACG;TCATGATTGTCACCCGTGCG	-0.92;0.55;0.56;0.81
Ltbp1	0.139665	GGGCAGTGCAGAAATACCGA;ATGAATAGTTGAAACCCCTG;CCACACTGGTCGCATCAAGG;GGGTACCGGATGTCACGGAG	-0.08;0.0;0.29;0.35
Olfr911-ps1	-0.182513	AATATACACAACAACAGCAG;ATAGAGATTCTAATCGTAGG;ATGTTGTGTTCTGACATCAA;CTGGGTCATACATCCCATGT	-1.07;-0.53;0.25;0.62
Gm2956	-2.28009	TGAATTCAGTGTTCATCCTG;CAGAAGGCTGCTGGTGGAGC;CAGTTCCTTGGAGTACTGCA;TTTGTGGATCAGCATTAAGG;ATGAAAAAGGAAGAAGGAAA;AGACCAACAGAGAAGGAAGA;TGTGTCACTGACTCACCTGT;AAGGAAGAAGGAAATGGTTA;TTCTTTGTGGATCAGCATTA;AGGCTATTTCAGAAAGAGAA;GAAGGAAATGGTTATGGAGA;TCAAATCCTCATACATGTAA;AAGAACTGAAATTGGATATG	-3.29;-3.04;-3.01;-3.0;-2.91;-2.83;-2.33;-1.91;-1.85;-1.72;-1.37;-1.35;-1.04
Gm2951	-2.67385	GGATGAGGTTAGATTCAATC;ATGTCTCAAAGTTGATCCTG;TGAGGTTAGATTCAATCAGG	-2.79;-2.73;-2.5
Chadl	0.219983	GTTGTGGGCCAAGTTGAGAG;ACCCGGCACAGCACTTGCGA;TGGTGTTTGGCACCTCGGTG;AGAGGGCCGCAGCGTATCCA	-0.35;0.14;0.37;0.72
Secisbp2	-0.38809	TGCCGAACAATATAACCCAT;AGTACGACTACAGCCAAGCA;ACCGTCAGGACTTCATAACT;CTGTACAAATGGATAGTAGG	-1.03;-0.94;-0.11;0.53
Calhm5	-0.207653	CTCCTGTGGTAAAAGTAGCA;GCCAAGGATCAGTAACACCC;TCTGCAGCGTGCATAACAAG;TGAGCGGGACAAGAAGCACA	-0.71;-0.22;-0.04;0.15
Cacna1i	-0.292947	TAATCGCTCCTACTCAGACG;CACCAACCGATCAGACTGTG;ACTGGGTCGCTATGACAACG;CAAGGGACAGTGTCCGACGG	-1.32;-0.19;-0.09;0.43
Calhm6	-0.103133	CGCTCCCGCTGACAGCACAT;GGGACACTGGAACACCACTG;GGTGAGGGGCGCGAATGCCG;GGAGCGCGCGATTCAGTTCG	-0.78;-0.16;0.26;0.28
Calhm1	0.139281	CTGCTTACCCGGCTACAACG;TACCACGAACGCTAGTAATG;GAACTGGCTGCTAGCCCGAG;ACATGTAGCGTAGAACAGCT	-0.68;0.12;0.38;0.74
Ctdspl2	-0.21246	AGAGAGAAAATCCTTCGAAG;AACAGTTGTCTCGAGTAAGA;GTACTCGTCAGCCCATGCAG;CAAATCAAGCAGTTCAAGTG	-0.85;-0.43;-0.12;0.55
Cacna1a	0.268839	CCCGCCCCTCAACCACACCG;TGCTGGAAAAGTGTCGAAGT;ACAAGTTGGGACCAGACACG;CAGGACGACTTGTAAACCTG	-0.08;0.17;0.33;0.65
Cacna1b	-0.434521	TCTGTGCTTTCACCATACGC;AAGGGCTCCTACCTTCGGAA;CATGGGATTGAGTCGCAAGG;GAGCGACGAGCAAGACACCG	-1.67;-1.45;0.34;1.04
Cacna1c	0.364041	GACATCGAGGGAGAAAACTG;AATCAGGGTGGATAAGACGT;CCAGTAAATTCCAACCATTG;CCAGTACAAAGTGTGGTACG	0.15;0.24;0.52;0.54
Cacna1d	0.961663	AATGGCACGGAATGTAGGAG;CATCATGTATTCGAAAGGCG;ACAGCGCCATCATAGCCGAA;GGAACCGGTTCAATCGCAGG	0.55;0.59;0.76;1.96
Cacna1e	-0.134661	CAAGAGCACAAAAGTAGATG;GGACCCTGTACTAACTAACT;AGACTACAAAGTGCCACACA;GTTGTTCCCACACAGACATG	-1.37;-0.11;0.23;0.71
Cacna1g	0.306166	GGATTCTTAATGTAGCCGAA;GGCAAACGGGAAGATACGAG;CAGACCAGGAATCTCGCTCT;GGCAACGGACTGGCTCCAAG	-0.64;0.24;0.63;0.99
Impad1	0.0136803	CTCCCACTAGATAAATACTG;TCCTTCACGAGAAGTCCAAG;ATTCCTGTGTAGCATCAAGT;GCTTGGGCAATGGTAGATGG	-0.52;0.02;0.25;0.3
Cacna1s	-0.730632	AAATGCACACCAGCACACCA;TCTCCAGCATTACAACCAGT;TCCAGCTCATGTAACCACGG;CTGATGGAATAGGAAGCCGT	-1.98;-0.71;-0.19;-0.05
Olfr1414	-0.736039	ACAAACATACCAGATCTCCA;TACACACTCTGTACACACCA;AAGCTGGACACAGAGCCCTG;CTGCACTGACTTCTCTACTG;AGATGCGTTTCCTCTGCAGG	-2.11;-1.4;-0.26;-0.03;0.12
Xrn1	-1.2719	TACTCTATAAAGTACAACCC;GCTTGGATTAACAAGTCACG;ACAAGGTATCTCTCAAATCG;GTATTCCAGCAGAGTAGTCG	-2.13;-1.62;-1.36;0.02
Xrn2	-1.46829	GGTTAACATATACAAAAACG;AGGACTGAACAACCTTACGT;TCTCTACATGGCAATAGATG;GTTTAAATAATGACCCTGGG	-2.81;-2.63;-0.61;0.17
Pde11a	0.203986	TTGTAGTCGATGGCCGTAGG;CGACGGGGAGATTATCGGTG;AGGTATCATTGGCTATGTCG;GGACCCACGCTTTGACGCTG	-0.06;0.12;0.15;0.6
Gm45420	-3.20756	ATGCGCCCTCTCACATTCGG	-3.21
Dynlrb2	-0.451836	CATTCCAATCCGAACAACCC;GAGAATCCAGAGTCACAAAG;CAAAGGGGTCATCGGAACGA;AACCCTGGACAACTCCACAA	-1.48;-0.42;0.03;0.06
Dynlrb1	-2.19411	CATTCCCATCAAGAGCACAA;ACAACTTCATCTTGAAGGCG;AGGTGGAGGAAACACTCAAG;GTTGGCATACTGTGTAGTGG	-3.13;-2.85;-1.52;-1.27
Cnot9	-0.556616	GATCTTCTGGAGTATGAATG;AATGCCATAGCATGGGTGCA;GCCTACTGCACTAGCCCAAG;TGCTGACTGTGTGCAAAAAG	-0.95;-0.91;-0.32;-0.06
Cnot8	0.507834	GAGCTTCGAAATTCACCGAT;ACCCGTCTGGAATCAACACA;GCAGTTCCAGAAACACGAGG;GGTGTGGGCCAGCAATCTTG	0.36;0.42;0.63;0.63
Gm10486	-2.09012	TTCAGATGAAGAAGAAGAGC;TAGAGACACCAATGGAAAAC;CTGTGGGTGATACCAAAGGA;GAAGAGCAGGCTCATTCTGA;TCATCTGCTTCTACGTGAGG;ACGTTCTGTAGAGACACCAA;ATCCAGTAACTCATGATGAT;AGACATGCATGAGAAGTCCA;GAACAAGAAAAATCAGTGGT;ATAGTAAAGAGGCCAGCATT;TGTTGGATAAATCTGGAGGT;CATGCATGAGAAGTCCATGG;TAAGTGGTGAACAGCAAGTT;TTCCCATCATCATGAGTTAC;GTGTGAGCAGAAGTTTGATA	-2.92;-2.73;-2.67;-2.65;-2.58;-2.57;-2.44;-2.37;-2.03;-1.99;-1.95;-1.93;-1.26;-0.82;-0.44
Gm10487	-2.09012	TTCAGATGAAGAAGAAGAGC;TAGAGACACCAATGGAAAAC;CTGTGGGTGATACCAAAGGA;GAAGAGCAGGCTCATTCTGA;TCATCTGCTTCTACGTGAGG;ACGTTCTGTAGAGACACCAA;ATCCAGTAACTCATGATGAT;AGACATGCATGAGAAGTCCA;GAACAAGAAAAATCAGTGGT;ATAGTAAAGAGGCCAGCATT;TGTTGGATAAATCTGGAGGT;CATGCATGAGAAGTCCATGG;TAAGTGGTGAACAGCAAGTT;TTCCCATCATCATGAGTTAC;GTGTGAGCAGAAGTTTGATA	-2.92;-2.73;-2.67;-2.65;-2.58;-2.57;-2.44;-2.37;-2.03;-1.99;-1.95;-1.93;-1.26;-0.82;-0.44
Cnot3	-2.10501	TGGTCTCCAGCATACGAACA;CCAGCTCCCAGCCACAACTC;AGGCTCAGGGAATAACTCGG;TGACACCTTAAATATGCAGG	-3.34;-1.81;-1.76;-1.52
Cnot2	-0.980028	GCTAGAATTTGAGTACATCG;GGAATGTTAGTAACTCGACC;TAAGCTGCGATTTAACTGAG;TATTCCGGTCAGCTAACGCT	-1.68;-1.5;-0.83;0.1
Gm10488	-2.05502	TTCAGATGAAGAAGAAGAGC;TAGAGACACCAATGGAAAAC;CTGTGGGTGATACCAAAGGA;GAAGAGCAGGCTCATTCTGA;ACGTTCTGTAGAGACACCAA;ATCCAGTAACTCATGATGAT;AGACATGCATGAGAAGTCCA;GAACAAGAAAAATCAGTGGT;ATAGTAAAGAGGCCAGCATT;TGTTGGATAAATCTGGAGGT;CATGCATGAGAAGTCCATGG;TAAGTGGTGAACAGCAAGTT;TTCCCATCATCATGAGTTAC;GTGTGAGCAGAAGTTTGATA	-2.92;-2.73;-2.67;-2.65;-2.57;-2.44;-2.37;-2.03;-1.99;-1.95;-1.93;-1.26;-0.82;-0.44
Cnot7	-1.09807	CCAGTTTAAAAAACACGAGG;TGACAGGAAAAAATAACCGA;CTACATTACACCGCAACAGT;TGCCAAGTTGACGTTCCTGG	-1.91;-1.68;-1.08;0.27
Cnot6	-0.191021	TGAATTTAATCAGCTAGCAA;ATAGCTGGAAAACCACATCT;TCGGAAACATGGTATCACTC;TTAGTCCAAAGTCTCGAGCT	-1.23;-0.27;0.25;0.48
Cnot4	-1.10592	CACACACTACGACCGCCAAA;ACAAAGTGACACCATTACAA;ACCCCAACCCTATACCAAGT;TCTTCATGAATTGGGAGATG	-1.72;-1.47;-0.91;-0.32
Oscar	0.0764022	ACAGAGTCAATATACTGCAG;GCTACCGCAAGACAGACTGG;GCTCAACGGACACATCCCGG;CAAAACTCATGCCCGGTATG	-0.09;0.03;0.09;0.28
Sirpb1a	0.116536	TAAAGGTCACTGTCTGCTGA;TTAGATCGAGCCCCTCTCAG;TGTCACTGTGCAGTTTAGAG;TGAAACATTTGTTATTCGGG	-0.22;0.1;0.22;0.37
Sirpb1b	-0.223013	TGTCTGCTTAGGGACAGCTC;TGATACGGATGGAAAAGTCC;CTGAAACACTTGTTATTCGG;GACAGAGAGATTCAGTCTGG;TTAGATCGAGCCCCTCTCAG;CTTCACAAATGATCTGAGAG	-0.63;-0.63;-0.54;0.06;0.1;0.3
Sirpb1c	0.24755	TGATACGGATGGAAAAGTCC;TTAGATCGAGCCCCTCTCAG;GACATGGAGATTCAGTCTGG;TAAAGGCCACTGTCTGCTGA;ATAAGGTGGTTCAAGGGTGT	-0.63;0.1;0.53;0.54;0.7
Nfic	0.064559	CCTGGCATATGACCTGAACC;CAGGAGCAAGCGGCACAAGT;CGGAGCTGATCCAAGTGTCT;ACCGCGCTCCCGCACAAAGT	-0.16;-0.11;0.11;0.43
Nfib	-2.63721	GCATGAGAAACGAATGTCGA;AGTGCTGGGTTTGTGCAGTG;TAGGCAATTGCACGGACGTG;CTGGCGTCTGGATCTAGTCA	-3.1;-2.72;-2.42;-2.3
Nfia	-1.37355	TGAACAAGATCACCATGACG;TATCCGACCCGAGTACCGAG;ACCATGTGTAGGCGAAGGCG;ACAGAAACCCCTATGTGATG	-1.82;-1.8;-1.07;-0.81
Cxcr3	0.0560067	AGTTAACACCAGCAGAACAT;TCTGCGTGTACTGCAGCTAG;ACTGGCAATGGGTGGCATTG;TGAGGGCTACACGTACCCGG	-0.81;0.09;0.31;0.64
Cxcr2	-0.395309	TGTGGTTGTAATATACGTCC;TCGTAGAATTAAGATGGGCA;GATATTCTCATACGTGAAGG;CAGGTTCAGCAGGTAGACAT	-0.98;-0.48;-0.38;0.27
Cxcr1	-0.186575	CGTAGACATCCATGACGGAT;AGTGAGACCATCTTGCACAG;GGTCATCCGAAAATCTGTTG;GGGATGAAATAATCTCCAGT	-0.54;-0.49;-0.2;0.49
Cxcr6	-0.466855	ACGCTTCCTAAAGTTCAAGG;GCAGAGTACAGACAAACACC;GAAGTTTCGAGCATGAAGCA;AATGTATATAATCAGAACCA	-1.09;-0.53;-0.2;-0.05
Ttyh2	-0.141967	TCACCTGTAGTATTCCACAT;GAAACAGCGAGACCAACGAT;ACAGGGAGCCAGATCAACTC;CCTGGTAAGTTTCGTCGCCG	-0.53;-0.26;-0.07;0.29
Cxcr4	-0.230561	TCTTCTGGTAACCCATGACC;TGGTGGCGTGGACAATAGCG;TGGAGACTATGACTCCAACA;ACAGGCTATCGGGGTAAAGG	-0.56;-0.49;-0.31;0.43
Cyp2j11	0.167021	CCGGTGACTGTCCATCATAC;GTTGCCTTGCAGCTAAACTG;AGAGGCTTACCATCTTGTGA;AGATGAAATCATATGTTCTG	0.07;0.08;0.2;0.32
Cyp2j12	-0.36327	AAACGTGTCTTTAATAACAA;CATTGATGCCTCCAAACACG;ACCAAATGATGGAGAGTCAC;ACCTGCTGAATCACTACATG	-1.85;-0.17;0.04;0.53
Cyp2j13	-0.570789	CAACATCCTCAACACTACGA;CTTAGAGCATCGAATTCAGG;GCTTACATGGACCATTAGGG;CTGGAACGAGTTGCCCACAA	-1.67;-1.15;-0.01;0.56
Fbxl20	-0.432803	GAAAATATTTCAAAACGATG;AACAACGTTTACCTAAGTCG;GAACTTGCTAAGGCTAGTGC;GGTTTAAAGTCACTAGCTCA	-1.6;-0.49;-0.12;0.48
Tnfrsf13c	-0.174071	CAGACTCACTAGACCCACCA;CTCCGCGCTGAGACCCGACG;GACACGCAGTTTCTCACCAG;GCACTCGGTCTGATTGCACT	-0.47;-0.46;-0.37;0.6
Fbxl22	0.467773	GCAGGAGGAAATCATTAACC;GAGAGAATGGAAGTGCAGCA;CCAGGCAGTCGTCCGTGACG;GCGTGACGGACGTCAGGTTG	-0.14;0.17;0.71;1.14
Dlc1	-0.0363123	GTCCACCTTGAACAACGTGA;TGGATGTGGACCATGACCGA;CTGATGACGGAATTGGTTCG;AGGCCAGTCTGCTTATGATG	-0.75;-0.03;0.25;0.39
Pkig	0.421221	TGACATCCAGGGTGACTCGG;GGAAGTCGAGTCCTCCTACT;AGCGAGCTTCCGCACACTCA;CCTGCGACCGGACAGGCCGT	-0.14;0.03;0.22;1.57
Pkia	-0.0998836	GGCCTTGATATCAACAAGAC;AAATGCAATACATGATATCC;GAATTAGCCTTAAAACTAGC;ATCCTGGTTTCCTCTGCAAG	-0.52;-0.47;-0.19;0.77
Pkib	-0.21102	TGTCGGGTAAGGCATTGCGG;ACCCGACATCCAGAGTTCAC;GCCAACGCTTCCAGTTTCAG;TTCATCAGAGATGACTGATG	-0.52;-0.46;0.06;0.08
LOC102632821	0.405713	GACAGAGTGCCTGTAGCGGG;TCATAGCGGAGTCGTACCGA	0.38;0.43
Arhgef25	-0.445676	CGACTTGGGACAGATCGTAG;AGAGAGTGATTGTATCGAGG;CTGGACCAGTAACTGGCCTG;CTGGAGCCAACTTTAACCAC	-1.15;-0.62;-0.1;0.09
Lnpep	-0.0813027	TGCAGTGGTGGAATGACCTG;TCCTGTTAGAAGAGGTTCCG;ATATTGGAATATGCCAAAGG;TGTGAAAATGAGCACATACC	-0.63;-0.13;0.14;0.29
Gm46432	-3.42692	CTCAGAACAGAACAAGAAGA	-3.43
Gss	0.126739	GTTCTCTGGACCAAAACCGA;AGTCAGTATAATTCACAGGT;ACAGCTGGCTGGGACTAAGA;TCAGATTACATGTTCCAGTG	-0.86;0.22;0.49;0.65
Gsr	0.172959	GGCTATGCAACATTCGCAGA;CGGCCCCCACGATGACGCTG;AACATCTGGAATCATGGTCG;GCTGTGAGGGTAAATTCAGT	-0.71;0.3;0.33;0.78
Izumo1	-0.0446963	ATATCTGACCAAGTCGATGG;GTTCTTTGTCCCAACAAATG;CGGAAATCCCTAGATTGTGG;ACTGACCTGTGACATCGTAG	-0.46;-0.03;0.06;0.25
Gsc	0.351479	ATGCTGCCCTACATGAACGT;AGCACCGCGTCTTTGCAGCG;GCGATCGCGACCCTACCTGG;GGTCTTCCCGGCTCTACACG	-0.33;0.27;0.72;0.75
Izumo3	-0.267704	GATAACCCATATAAGCTCCA;AGGTACCAGGTTTCCCAACA;CTGGGCAACGAAACATGGAA;GAAGACAGTTCCAACAATCG	-1.19;-0.18;0.01;0.28
Izumo4	0.221179	CGTGAACCTCAAGTCGTGGT;AGGATGGACCAGCTGTACCA;GCAGTGCGACCCCAATTTCG;AGTGACGCTGACAGTCAATG	0.1;0.16;0.29;0.33
Tagln	0.0260039	ATCTGCTTAAAGACCATGGA;ATGTAGGCCGCCCAGATCGT;AATTGAGAAGAAGTATGACG;GTGAACAGCCTGTATCCTGA	-0.39;-0.14;0.14;0.49
Wnt3	0.400923	TGTGCTTGTTCATAGCTGAG;ACCAAATTGGGTAGCCAGCG;CACGAAGGCCGATTCACGGG;GAGGGAACCTCCACCATCTG	0.13;0.45;0.46;0.56
Wnt2	-0.0676908	AAACAAGAATGCAAGTGTCA;TGAAGAGATGGCGTAAACAA;ATTGTCACACATCACCCTGG;GCAGTGACAATATTGACTAC	-0.56;-0.54;0.29;0.54
Wnt1	-0.0958085	ATCCGTCAACAGGTTCGTGG;CCTGCACCTGCGACTACCGG;TTCGGCAAGATCGTCAACCG;CCACGAACTCTCGGCCAAAG	-0.89;-0.12;0.28;0.34
Wnt6	-0.0620664	GTAGTGGCAGAGCTTGCCCG;TGTGCAGTTGCACCAATGCA;CCGCGCACGTCGATGGACTG;AAGCCCATGGCACTTACACT	-0.21;-0.14;0.04;0.05
Wnt4	0.327128	TTTGGGAAGGTGGTGACACA;TTACAGCCAATTGCTCGCGG;GTGATGGACTCAGTGCGCCG;GGTGGAGTGCAAGTGTCACG	0.04;0.06;0.4;0.8
Syngap1	-0.175778	TGAGGAACCCTAACATCCAA;GCTTCAGCACGTTATCTACT;GAGCACGAATGAACTCCCCT;AATACCACTTGGGTCGCTCG	-1.04;-0.26;0.16;0.43
Trpd52l3	0.678996	AGCGGTGTGGCGAACTCAAG;ATCTGAGCTCACTAAACTGG;GGAGTCCAATCCTTGGTTTG;TTCAGAACCAGATCTGACGG	0.27;0.37;1.0;1.07
Grhl1	0.142184	CAGCTGGGCATTGATAAGAG;TCCGAAGGCTGAGTTCCGAG;GTGTCGATTTGAATGTTGAG;AAAACCACCACACGTTCGGT	-0.48;0.06;0.47;0.52
Grhl2	-0.056908	TGGTACATTTCAGTACACCC;GAAGCCCAGATCAATTTGAG;CGCGCGGGGATAGTGCACCG;GTGTCGATCTGAATCATCAG	-1.08;-0.12;0.32;0.65
Sod1	-2.37897	TAAGAAACATGGTGGCCCGG;AAAGCGGTGTGCGTGCTGAA;CAGTATGGGGACAATACACA;GACTGCTGGAAAGGACGGTG	-3.54;-2.78;-2.59;-0.62
1190005I06Rik	0.268448	CAGCAACAACAACCACGACG;GGGGGCGTGATGATAATGTT;CCCGCAGAGGCGACGCCATG;GCGTCGCCTGGTGTCCCTCA	-1.43;0.39;0.75;1.38
Defa5	-0.965146	ACAGCCTGGTCCTCTTCCCC;TAATACTGAGGAGCAGCCAG;CAAAGGAGATAGACACAGCC;TTTGTGGATAGGATCAGCCT;CCTGGAAGGCCAGCAGGACA;TCTCCTTTGGAGGCCAAGAA;CCTTGTCCTGCTGGCCTTCC;CCTCTCTGCCCTTGTCCTGC	-2.96;-1.75;-1.4;-1.15;-0.89;-0.09;-0.02;0.55
Defa3	-2.31184	CATACCAGATCTCTCAACGC;GGATAGGATCAGCCTGGACC;CCTGGAAGGCCAGCAGGACG;CAAAAGAGACAGACACAGCC;CCTGCTGGCCTTCCAGGTCC;TAAAACTGAGGAGCAGCCAG;CCTGGACCTGGAAGGCCAGC;CTTGAAGAGAAGAGCCTTCT	-3.15;-3.13;-2.61;-2.23;-2.04;-2.03;-1.97;-1.34
Defa2	-1.02229	GGATAGGATCAGCCTGGACC;CCTGGAAGGCCAGCAGGACG;CCTGCTGGCCTTCCAGGTCC;TGAGGAGCAGGCAGGGGAGG;TTCAGTGGCGGTGGCGGCGG;CCTGGACCTGGAAGGCCAGC;CAGGCTGTGTCTGTCTCCTT;CAAAGGAGACAGACACAGCC;TCCTATCCAAAACACAGATG;TAGTCTCCTCATCTGTGTTT;TAATACTGAGGAGCAGGCAG;ATAGAGGAGAACAAGTTTAT;AGATCCTTCTGGGTCTCCAA;TCATGAAGAGCAGATCCTTC;CTGATATGCTATTGTAGAAA;GTCTCCTTTGGAGACCCAGA;AATAGAGGAGAACAAGTTTA	-3.13;-2.61;-2.04;-2.01;-1.97;-1.97;-1.15;-0.97;-0.78;-0.75;-0.55;-0.38;-0.31;-0.22;-0.06;0.7;0.8
Hhatl	-0.554628	CCACATAGAGGACCATACAG;TGGCGAACTTGAGATCGCTG;TAGAGCGCAGTAATGCACTT;CAAACAGCACGTGTCCAGAG	-1.58;-0.45;-0.25;0.06
Tmprss9	-0.376271	CCGGAAATGTACAATCACAG;GGACACAGCGGACTTCGACG;CTGGTCCAGCAATTCCACCG;GAAGGACCCAGACATTTCTG	-1.92;-0.48;0.21;0.68
Cyp4a12a	-0.237392	GATGTGTCGAAAGATCTCCA;AATGTCATAGTGGAAAGCTG;GTGAAAGATGTTCCGCACAC;GAGGATTCAACTTCAGGATG	-0.55;-0.28;-0.1;-0.02
Cyp4a12b	-0.182244	TGGCTGTACATACCAATCCA;TGACATTCTGAAGCCTTACA;AATGTCATAGTGGAAAGCTG;GATGTGTTGGAAGATCTCCA;CTGTGTGATCATGGGCAAGT	-0.47;-0.41;-0.28;-0.24;0.49
Tmprss3	-0.0472878	ACTAACAGCTCGATGCGACG;ATGTTTCCACCCACAATTCG;GCCGCAGTGACGATCCACAG;GAGCTCAGACCACCTAAGAG	-1.25;-0.05;-0.02;1.12
Tmprss4	-0.0173416	GCTGCTGTGAGGATCCAGTG;AGGGCAGGCTCAAACATACT;CTGTGACTTGAGCAACAGGG;CCACGGCCAAGAATCCACAG	-0.38;-0.11;-0.06;0.49
Tmprss5	-1.13282	GGTGCTGTCCGACAACACCA;ATCTTTCAGAATAAATGGAG;AGAGAGTTGAGCAAACTCCT;AGAGAAACAATTCGGCCAGA	-1.96;-1.81;-0.68;-0.08
Tmprss6	-0.104901	GGAAAGCAATAGACTCCCGT;CCTTGATCCCGTCACACGCA;AAGACCTCATGATCAAAGTG;GGTTCGATGCCTACGCACTG	-0.66;-0.32;0.14;0.41
Tmprss7	0.392365	GAAAACCCATTGGCAAACCC;AGGAAATCAACAGCTTTGAG;TCATAAACCGCACTTCTGTG;GTGACACATTAGTTGTCCCG	-0.48;-0.17;0.44;1.78
Trhr	-0.0406344	CTAAAGAAAACTCTAAGATG;GGTGGTTACCATCTTACTTG;CACCTACAAAAACGCTGTTG;AGATACTGTCGGTTATGTTG	-0.95;-0.15;0.42;0.52
Gm14567	-2.07532	CCACATTCTCTGCATCTGAT;CGAAAATGAGATAAAGTCCA	-2.34;-1.81
Uqcrc2	-1.99993	CATCTTTCAAGATAACCCGT;GCAAAAGCCAAATACCGTGG;AACAAGCCGATTCTTGACAG;ACAGTACAAAGGATTAGCCA	-3.03;-2.33;-2.18;-0.46
Tmed11	-0.348214	AGTGATACATTGATAACAGG;GTCACAAACATTCCTAAGCC;ATCCACTTAGATATTCGAGT;TCCAAGTTATATGGTGCACA	-0.87;-0.6;-0.36;0.45
Tmed10	-1.56585	TTTCTTTCTCAGGAACAGGG;AAACATGTCATAGTCTTCCG;CTCTCGCAAGTGTCTCCGAG;AGAGGCGAAAAATTATGAAG	-2.32;-2.06;-1.25;-0.64
Myh2	0.229733	AGTTGGCCCAGCTTATTACC;TTCAAGGTGACCAATGCTGT;GCACCCATCCTCATTTCGTG;ATTACCCATTTGTCAGCCAG	-0.1;0.14;0.43;0.45
Gm9211	-2.79606	GGCCGGTGCTGAGTATGTCG	-2.8
Gm12241	-0.0493399	GCTGGTGAACCACGTCACAG	-0.05
Gm12245	-0.192163	AGTCATACTGGATCTCACTG;AAAAGACAAAAAAGGTGGGA	-0.2;-0.19
Rrh	0.114328	ACTAGCGGCGTAGAGTCTCA;CATCGGCTATCCCATGTCTG;TCATCAAGTACAAGGAGCTG;GACTGAGCACAGCGTCATAG	-0.36;-0.32;0.49;0.64
3110082I17Rik	0.177871	CGCTGCTACACAGACTGCCA;AGGTCTCGAAGGGACAGGAA;TCCAGAAGACAAGACAGACG;CAGCCCTGAGTTGTCCCCAG	-0.62;-0.57;0.85;1.05
Id4	-0.676773	GCACGTTATCGACTACATCC;CAACAAGAAAGTCAGCAAAG;AGTCGTTCATATCGCACTGC;ACGACTGCTACAGTCGCCTG	-2.16;-1.56;-0.41;1.42
Id2	-0.180254	GCACGTCATCGATTACATCT;TGATGCAGGCTGACGATAGT;CTCCCGGAGCAAAACCCCGG;AGCCTGTCGGACCACAGCTT	-1.54;0.06;0.06;0.69
Id3	0.221136	CGGTCGACGGGCTCTTACCG;GGTGCGCGGCTGCTACGAGG;AGTGGTTCATGTCGTCCAAG;TGGCTAAGCTGAGTGCCTCG	0.14;0.21;0.26;0.28
Id1	0.00300863	CCGCCTTCAGCGAACAGCTA;GTCCTGCTCTACGACATGAA;TGGTCTGTCGGAGCAAAGCG;CCAGAACCGCAAAGTGAGCA	-0.31;-0.21;-0.07;0.6
Rrnad1	-0.0223355	AAGAAGCTTAGCGATCTCAC;TCTCCGTAGATGGTGCAAAG;AGAGCCTTGAAGGGAATCAG;GCAGCAGAAGTGTCTTAGCA	-0.64;-0.15;0.13;0.57
Tpd52	-0.347079	TCCAGAATCAAAATCAAAGG;AATCGGGGGAACATACGCAT;GGTTCACCTACACAGAACGT;GGCGGGAGCTTACTAAGGTG	-1.57;-0.94;-0.03;1.14
Asgr1	-0.249203	GACCATCATCAACTCCGGAG;CAGCAGAAGGATCTGACTGA;TGTGTGATCACATCCCAAAG;CATACTCCACCCAGTTGATG	-1.57;-0.07;-0.01;0.65
Asgr2	-0.15904	CTAGGATAGAAAATCCACAC;CAGAGCCCCGAACTCCATCA;TTCCTGGTTAGCCCAACTGG;GAGCAGACTGAGGCGGAACG	-2.03;0.17;0.33;0.89
Csn2	-0.0352542	GAAATGACAGGCCCAAGAGA;TGAGCATATGGAAAGGCCTG;GGATTTGAGAGTTTATGAGG;GACTGATAGTATTTCCAGTG	-0.33;-0.08;0.09;0.18
Csn3	-0.397215	CTCCAGCCCCAATCTCCAAA;GAAGTAGTCTAACAACAAGT;ATATTGATTGAAGTTCAGGA;CAGGCAAAGATGGCCTGTAG	-1.05;-0.65;-0.55;0.67
Supt16	-2.43934	ATGGGAATTGAATTCCGTGA;CTATAATCTCAAGTTCAGTG;AGTGATTGTCTCAACAAGGA;ACTGGCAGCACAGCTCAACG	-3.05;-2.94;-2.7;-1.07
Trub1	-0.323554	ATAACACGAGAAGATATCGA;ACTGTGGACAGTCACGGGCC;ACATTGAAAGTCGGACACGG;TGTTGACCAGTATGTTGTCG	-1.53;0.01;0.04;0.19
Trub2	-1.91051	TCGCTGTCTATAAACCTCCG;GAGGCTGCGTCCATGTCCCA;ACAAACCTGAAGATCGGTGT;CCACAGGATTACACAGTGCG;TGAAGGAGGAGACCCGAGTG	-3.16;-2.64;-2.44;-1.06;-0.25
Ids	0.0511124	TCCCTTGGAAAACATAACCC;CATTCTCCTTGAAGTATTGG;TCCCTATGGACCAATTCCTG;GTCTCCATAACAGCCCAGGG	-1.42;-0.35;0.35;1.63
Gm13119	-0.993517	CAGACACACGAAGATACTGA;ACCCTCATAGATATGCACTG;CTTGCAATACTGTCATGTCA;AGGTGCAAAGCATGCCAGTG;TGTGTGAAATTGCAGATTAG	-2.5;-1.73;-0.75;-0.17;0.19
Gm13118	-3.41648	AGGTGGAGTATTTCCTGAAG	-3.42
Zfp507	0.0814322	ACATGCTTGGAAACATGCAG;CTTGTACAGATGGCCCATTG;TCTTATCGGCATGGTGACAA;AGAAGCTAAGCAAGATAGTG	-0.4;-0.16;0.13;0.76
Arpp21	0.0946984	CAGGTGGCCAGACCACCAGC;CCTGCGATATACAACCCTCC;CAAAGTACGCTGCCACCCGA;CACGGCCCTGACCTCTAGCG	-0.24;-0.22;0.15;0.69
Barhl2	0.0843508	AAGGCTGCAAACTTTGCGCG;TGTTCGGAGATTGATACCGT;GAGAGCCAAGAAACCTCGAA;TCCGATCGCTCGGTGAAGCG	-0.03;-0.0;0.16;0.2
Barhl1	-0.181429	GATGTCCCTGATCAGAAAGG;CCTGAGCGTGCAAGACCGCA;GCAGGTGAGAGTCCAAACCT;GTGCACCCTACTCTAGCAGT	-0.8;-0.14;-0.01;0.21
Gsta4	-0.282322	CAAGTACAACTTGTATGGGA;CATCCCATCGATTTCAACCA;CAACGAGAAAAGCCTCTCCG;CATGTATGCAGATGGCACCC	-0.6;-0.34;-0.18;-0.01
Gsta1	-0.606273	GTTTGACCAAGTGCCCATGG;CATCCCATCAATCTCCACCA;TTTCAAAGGCAGGCAAGTAA;CCCATAGAGGTCATATTTGG;AGGATTGACATGTATTCAGA;CTTCACTACTTCAATGCCCG;GGAGATTGATGGGATGAAGC;GCAGAATGGAGTGCATCAGG;AGACTGCCTTGGCAAAAGAT	-1.28;-1.02;-0.97;-0.94;-0.34;-0.32;-0.29;-0.19;-0.11
Gsta2	-0.74957	GTTTGACCAAGTGCCCATGG;CATCCCATCAATCTCCACCA;TTTCAAAGGCAGGCAAGTAA;CCCATAGAGGTCATATTTGG;AGACTGCCTTGGCAAAAGAC;AGGATTGACATGTATACAGA;CTTCACTACTTCAATGCCCG;GGAGATTGATGGGATGAAGC;GCAGAATGGAGTGCATCAGG	-1.28;-1.02;-0.97;-0.94;-0.87;-0.87;-0.32;-0.29;-0.19
Gsta3	-0.21284	CCAAGATCAAGGAACAAACC;ATCCCGTCGATCTCTACCAT;GACCTGGCAAGGTTACGAAG;GAAGAATGGAGCCTATCCGG	-0.86;-0.19;-0.1;0.3
Lyl1	-0.466392	AGGGTGGTAATGTACAGCCA;GGCGTGCCAGTGATAAACCT;AGGGAGTGCACGTGTTTCGG;AGGGCACCAACCCCAGAAGG	-1.09;-0.61;-0.09;-0.08
Med30	-1.23592	GGACATCGTGTACCGCACCA;GCACGGTCTCCTGCCCGATG;AGAGAATAGAAAGTTGCCGA;GGCCGTGTTGACCTCGCGCG	-2.54;-2.04;-0.31;-0.05
Med31	-1.52774	CTAACATATGTAAGCACTGA;CCAGTATGAGCACTTTCGCA;ACTTACAATTAAGGTAGTTT;ATGATGCTGGAAATCGGCTT	-3.34;-1.99;-1.82;1.03
Slc52a3	0.425789	GCTGGTGACTGAGTTGCCCG;TGTCTCCGTGACATTGACAC;GTGACCTCCTGGATACAGGG;GGGTCGGAAGCGGTGCATCA	-0.11;0.41;0.59;0.81
Ctag2	0.555224	TTGAGTTGAGACTACCTTGG;GGCAAGAGTGGTGGTCGAAG;TCTTGTGCACGATTTACATG;GAGCAGGCACCAATTATCCC	-0.17;0.69;0.82;0.88
Tmem28	0.603443	AACCTTGCGCCGATTCGGAG;GGGGGATCTACTGGCCGTAG;AGGCAGAAGAGTACTCTATC;GCAGCCGGTACCTCCTCGCG	0.34;0.49;0.7;0.88
Gm6532	-0.782293	GTCACCATTATAAATAGAGA	-0.78
Ccnyl1	0.323622	CTGAGCAAATCTCAAACGGA;TTCCCCTTCAGGTATCTCCA;AAACAGATACTTACTGTGAG;AGCCTCTCTAAGTAAACCTG	-0.29;0.15;0.38;1.05
Gm21861	-1.48982	CAGAAGCAGATGAAGATATG;AGCAGAAGCAGATGAAGATA	-2.25;-0.73
Tat	0.0734822	ATGTTCGCGTCAATATTGGC;GGCAAGCTTACCGATAGATG;TGAGCTGTGTCTAGCCGTGT;AACAACCCGTCCAATCCCTG	-0.5;-0.08;0.41;0.46
Upk2	-0.0920623	TGTCCCCTTCTGTACTCGGT;TCCCTGCGCCCGCGACATGG;ATGTGGCATTACCTCCCGTG;GGTCTGGCTACACCGTCACA	-0.43;-0.19;0.04;0.21
Taz	-2.23538	AGCAGCTCACCTCGACACAC;TATGAGCTCATTGAGAACCG;GGTCATCCATGCAAGACTGG;TTTGGAGAAGCTTAACCATG	-2.91;-2.34;-2.31;-1.38
Olfr196	-0.498127	ATGAATGAATCCACCTACAA;GATAAATGACCAAGAACAGC;ACATAGGAATGTGAAGGTGA;GCATTAGGTAATTGAGAGAA;TGCCAAGAGAAAACATTCTG	-1.63;-0.63;-0.27;0.01;0.03
Olfr197	-0.439439	AGATGAGAATGATCAGACCA	-0.44
Olfr194	-0.28015	CTTCCAAGGAAATAGTACAT;AAATGCATTAATAGATGGGT;CAGGCAAGTACACACTCTGT;AGAAGAACAGGAGAAACAGA	-0.72;-0.26;-0.09;-0.05
Olfr195	-0.344279	CAGCCCTAGATTCCCCACCA;AGGATCCCATGGTCATTTGA;TGCATCCTATGATTGAAGTA;AGGAGATTCTGTATAATGGA	-0.73;-0.65;-0.39;0.39
Olfr192	-0.939278	TGCTTCCCTATCATCCACAG;GAATTCCACCTACAAAAGAC	-1.38;-0.5
Olfr193	-0.60041	GCATAACATCACAATAAAAG;ATGAATGAATCCACCTACAA;ATTTGGAATCAGTGCAACCA;GACTTGTTCATCTGCCCCAG	-1.71;-1.63;0.08;0.87
Olfr190	-0.69072	TGCTTCCCTATCATCCACAG;GAATTCCACCTACAAAAGAC;ATTAAGAGTAGTGTCAGTAC;TCTATCTCATTACTATTGTA	-1.38;-0.5;-0.47;-0.41
Olfr191	-0.184517	ATTCATGCTTTAATTCACGA;AGATGAGAATGATCAGACCA;ACATAGGAATGTGAAGGTGA;CCAAAAACAGCAGGAACAGG;ATTTGTAGTGAGTGCAACCA;GACTTGTTCATCTGCCCCAG	-1.46;-0.44;-0.27;-0.19;0.38;0.87
Immp1l	-0.501305	TTTGGATGCCATAAAAATGT;AAACATTACTTACGTAACTG;CATCAGATGGACTAGTGCTG;ATACGTTGGTGGTGTTGTAA	-1.15;-0.63;-0.22;-0.01
Prl7a1	-0.394586	CTTGATACTCAGTAGAATGC;ACCTCAACATGGAGTTGCGC;AACCTATCTGAAGGTACACC;GATGATCCACTATCCATCAA	-0.74;-0.54;-0.4;0.11
Prl7a2	-0.413297	GAATATCAAAAACCTCAACA;TTGAGTAGCAATGAGACTGA;TCCAAGCCCACATTCTACTG;TCCTGGAATACTTCTGAGTG	-2.14;-0.2;0.12;0.57
Olfr198	-0.852598	TCATCACTGGATAAAGCAAA;GGAACCAAAGAAATAAAACT;AGTCACAGAAGATGAAGCAC;GAGCCCAAGGTTGCCCACCA	-2.14;-1.79;-0.65;1.17
Olfr199	-0.723464	CATCAACACTCGATAAAGCA;AGAAAGGAGAAAGCATTCCG;TTGAACAAAGCACTCAGCCA;AGCACCAAGTAAGTATGCCA	-1.17;-1.05;-0.51;-0.16
Virma	-1.47146	CCTTTATGATCAAGACGAAG;ATTATATTACCTTCTACGGG;ATTGTGGGGAAAGACTTGAC;GATATGAAGTGGTACCTGCG	-1.79;-1.56;-1.4;-1.13
Gm9711	-0.447223	GCTACCAGGAGATCGCCAAG	-0.45
Gm9712	0.0391325	CTTGGCGTAGTGCCAAAATG	0.04
Lrrc18	-0.00938353	TAGATGAGCTAGATCTTAGC;CAAAAAGATCACCCTTAATG;TGAGCCGCAAGATACACTTG;TCATCTGGCCAATGGATTCA	-0.26;-0.22;-0.02;0.46
Mb	-0.203449	GAACTTGTCAAACTTATCCA;TTGGGCTAGAGGCTGGATCT;AAGTCAGAGGAAGATATGAA;TCTCTTCCTCTTACCCGATG	-1.1;-0.39;0.28;0.4
Lrrc17	0.382737	CGCCGCTCCTGAGCTACCTG;ACATGTTGTTCTTTAACACG;ACCCCAAACCCCAAGTGTCG;CTGGGGAACTACGCCAAGTG	-0.38;0.55;0.61;0.74
Lrrc14	-0.452804	GATAAATGCATACCTGCACA;TGCTTTGGAGGGCCTCACGA;TCTACCCATGCGTAACACTG;ACACATAAACCGGCCCATCT	-0.8;-0.6;-0.47;0.06
Lrrc15	-0.405818	GGTCTCACCAAACTCAACCT;CAGGCTTTCAGACATCCCCA;TGTTGAGGAACTTGTCCTCG;CATGGGCCCAAAGACCCCCG	-0.78;-0.58;-0.21;-0.05
Lrrc10	-0.126478	CTGGCCGGGTAGCAGACGTA;GGTCTCCCACCACATAACTC;TCCAGAACCTACGGACCCTG;CTTCAAAGCTCTCCCCCGGG	-0.4;-0.12;-0.05;0.06
Basp1	0.360285	CTACAATGTGAACGACGAGA;GCTCGCTTCGCCGGCCTTGG;GGCGGCCGCCGACGCCACCG;GGGCGAGGCCAAAAAGACTG	-0.85;0.53;0.74;1.03
Fiz1	0.537455	CTGCTCAGTATGTTGCAACG;TTGAAGCCCTTACCGCATCG;GCTGCTCCTGAGCCCTACCG;CTACAGTGAAAGGGGACCCG	0.36;0.43;0.62;0.74
Gm5848	-2.67159	TGTGAAGGAGATGTGGACTG	-2.67
Gm5845	-3.18434	TGAACTGGTTAATGGCAGGA	-3.18
Gm5842	-3.24882	CTTTGTGCAAACTTGCCGGG;CTCAGAACAGAACAAGAAGA;AACCTACATCCCCCCCAAAG	-3.46;-3.43;-2.86
Bmt2	0.141764	CACTGGGCAAAAACTTGTGA;ATGAACGCTCTTCACCACCC;GTTCAGGACTAACAGCTCAT;AGATATTGTACCTGCTGTAG	-0.4;-0.05;0.1;0.92
Apopt1	-0.142597	AGAATGGAATCAACAGTTCT;TGTGAAAATGAACGGGACGA;TGAGCGCCCTACGGATCACA;CAGTCTTGCCATGATTGGAT	-0.42;-0.26;0.02;0.09
Myd88	-0.0297587	GCATCCAACAAACTGCGAGT;CCTGTCCTCAGGACAAACGC;AAGGAGCTGAAGTCGCGCAT;GGTTCAAGAACAGCGATAGG	-0.7;-0.38;0.27;0.69
Mup-ps9	-1.82346	GGATGCTGTATGGATAGGAA;TTCTGCATGGACACAGACTA;TTGAGTGGAGACTTCTCACC;CTGCTGCTGCTGCTGTGTTT;GCTGCTGCTGCTGCTGTGTT	-3.29;-2.43;-1.91;-1.58;0.1
Mup-ps2	-3.11789	GGATGCTGTATGGATAGGAA;AGAGAAAAGATAGAAGAACA	-3.29;-2.94
Gm20804	-0.186857	CATTTCCTACAAGAAGGATC;TTGGCTGCAGAATTTCTCAC;TGAGGAAAAACTACTTTGTG;GCAGCCAACAATATTCCCCA;CAACCAGTGCGCCTGCGAGG;TAGGAGGAAGCCTTCTTCCC;ATGGCCTTCCAATGGGTGAC;AGAGGTACAACACAAATTTG;CCAGGAGCTGATAGACGTAG;AGGTGGACATCCCTCACCTG;GCTGCAGAATTTCTCACGGG;AGGCGCACTGGTTGGCAGAG;GAGTGGGATGGTGCTAGCCC;GAAGCCTTCTTCCCAGGCCC;GCTCTGAGGACAACTGGAGT;AGCCTTCTTCCCAGGCCCTG	-1.54;-0.97;-0.6;-0.45;-0.31;-0.23;-0.17;-0.15;-0.09;0.01;0.02;0.09;0.32;0.32;0.39;0.39
Gm20807	-0.224816	GCAGCCGACAATATTCCTCA;TAGTAGTATTTCCTCAGGTG;ATTTCTCACAGTTGGAAGGA;TGAGGAAATACTACTATGGG	-0.82;-0.12;-0.09;0.14
Gm20806	-0.178657	CATTTCCTACAAGAAGGATC;TTGGCTGCAGAATTTCTCAC;TGAGGAAAAACTACTTTGTG;GCAGCCAACAATATTCCCCA;CAACCAGTGCGCCTGCGAGG;TAGGAGGAAGCCTTCTTCCC;ATGGCCTTCCAATGGGTGAC;AGAGGTACAACACAAATTTG;CCAGGAGCTGATAGACGTAG;AGTCCTGTAAGAATGGCACC;AGGTGGACATCCCTCACCTG;GCTGCAGAATTTCTCACGGG;AGGCGCACTGGTTGGCAGAG;GAGTGGGATGGTGCTAGCCC;GAAGCCTTCTTCCCAGGCCC;GCTCTGAGGACAACTGGAGT;AGCCTTCTTCCCAGGCCCTG	-1.54;-0.97;-0.6;-0.45;-0.31;-0.23;-0.17;-0.15;-0.09;-0.05;0.01;0.02;0.09;0.32;0.32;0.39;0.39
Gm7729	-1.42302	AGAGGCAGTGGGAAAAAGAG;GGGAACACTAACAGACTGTG	-2.84;-0.01
Gm20809	-0.193133	CATTTCCTACAAGAAGGATC;TTGGCTGCAGAATTTCTCAC;TTGTACCTCTCTGCAAACCA;GCAGCCAACAATATTCCCCA;TGAAGAAAAACTACTTTGTG;TAGGAGGAAGCCTTCTTCCC;AAACCAGGGCGCTGGCGAGG;ATGGCCTTCCAATGGGTGAC;AGAGGTACAACACAAATTTG;CAGCGCCCTGGTTTGCAGAG;CCAGGAGCTGATAGACGTAG;AGTCCTGTAAGAATGGCACC;GCTGCAGAATTTCTCACGGG;GAGTGGGATGGTGCTAGCCC;GAAGCCTTCTTCCCAGGCCC;GCTCTGAGGACAACTGGAGT;AGCCTTCTTCCCAGGCCCTG;TGCAAACCAGGGCGCTGGCG	-1.54;-0.97;-0.91;-0.45;-0.41;-0.23;-0.21;-0.17;-0.15;-0.14;-0.09;-0.05;0.02;0.32;0.32;0.39;0.39;0.42
1700012B09Rik	0.244947	ACCGCATAAGAGAATCAAGG;ATTGTTGGCGAGACTCTTGG;GAGGCAAGATTACCTGTAGG;CCTCAGAGGCGGGCCGCGAA	-0.49;-0.33;0.8;1.0
Gm11189	-3.16589	CAGTGATGAACTCTATGACA	-3.17
Gm8444	-2.84708	CGGGTCGCCAAAGTGACAGG	-2.85
Gm11185	-2.95154	GCTGTGGCGTGATGGCCGTG;GGCCGGTGCTGAGTATGTCG	-3.11;-2.8
Trmt112-ps2	-3.36231	TCAACCCGGAGTTCGTGGCG;TCGTGCTCATAGCCTTCAGT	-3.89;-2.83
Gm11236	-1.0999	GAAGGTGCATAGGAAGCTGG;TGAAATCAAGATCTTCCTGC;AGATGGCACCATCAATGCAG;GATTTCACTCTGAATACCTG;GGTGGCCCAAGATCTCGTAC;CTTCCTGCAGGAGTGGCAAG;TCTTTGTAACGAGAGGCCCC;AGGCAATAAGATGCATGCGA;GATGGCACCATCAATGCAGA;GAATACAAGCGGTAAGCCCG;TCAGTCCACGGGCTATCACA;AGATTTCATCCTCAGTCCAC;GAACGGGAATTTGGCCACCC;GTGTGATAGCCCGTGGACTG;GGACCTGATGTGGACCATGA;AAGGTGCATAGGAAGCTGGT;ACACACGTCTTTGTAACGAG	-2.22;-2.21;-1.95;-1.9;-1.82;-1.46;-1.32;-1.27;-1.17;-0.89;-0.78;-0.62;-0.58;-0.43;-0.16;0.01;0.07
Gm11237	-1.06272	GAAGGTGCATAGGAAGCTGG;TGAAATCAAGATCTTCCTGC;AGATGGCACCATCAATGCAG;GATTTCACTCTGAATACCTG;GGTGGCCCAAGATCTCGTAC;CTTCCTGCAGGAGTGGCAAG;TCTTTGTAACGAGAGGCCCC;AGGCAATAAGATGCATGCGA;GATGGCACCATCAATGCAGA;GAATACAAGCGGTAAGCCCG;TCAGTCCACGGGCTATCACA;AGATTTCATCCTCAGTCCAC;GAACGGGAATTTGGCCACCC;GTGTGATAGCCCGTGGACTG;CATTTCTCACACTTTGGACT;GGACCTGATGTGGACCATGA;AAGGTGCATAGGAAGCTGGT;ACACACGTCTTTGTAACGAG	-2.22;-2.21;-1.95;-1.9;-1.82;-1.46;-1.32;-1.27;-1.17;-0.89;-0.78;-0.62;-0.58;-0.43;-0.43;-0.16;0.01;0.07
Gm11238	-1.04155	GAAGGTGCATAGGAAGCTGG;TGAAATCAAGATCTTCCTGC;AGATGGCACCATCAATGCAG;GATTTCACTCTGAATACCTG;GGTGGCCCAAGATCTCGTAC;CTTCCTGCAGGAGTGGCAAG;TCTTTGTAACGAGAGGCCCC;AGGCAATAAGATGCATGCGA;GATGGCACCATCAATGCAGA;GAATACAAGCGGTAAGCCCG;TCAGTCCACGGGCTATCACA;AGATTTCATCCTCAGTCCAC;GAACGGGAATTTGGCCACCC;GTGTGATAGCCCGTGGACTG;CATTTCTCACACTTTGGACT;GGACCTGATGTGGACCATGA;AAGGTGCATAGGAAGCTGGT;ACACAAGTCTTTGTAACGAG	-2.22;-2.21;-1.95;-1.9;-1.82;-1.46;-1.32;-1.27;-1.17;-0.89;-0.78;-0.62;-0.58;-0.43;-0.43;-0.16;0.01;0.45
Gm11239	-0.913848	TGAAATCAAGATCTTCCTGC;GATTTCACTCTGAATACCTG;GGTGGCCCAAGATCTCGTAC;CTTCCTGCAGGAGTGGCAAG;TCTTTGTAACGAGAGGCCCC;AGGCAATAAGATGCATGCGA;GAATACAAGCGGTAAGCCCG;TCAGTCCACGGGCTATCACA;AGATTTCATCCTCAGTCCAC;GAACGGGAATTTGGCCACCC;GTGTGATAGCCCGTGGACTG;CATTTCTCACACTTTGGACT;GGACCTGATGTGGACCATGA;ACACACGTCTTTGTAACGAG;AAGTTGCATAGGAAGCTGGT	-2.21;-1.9;-1.82;-1.46;-1.32;-1.27;-0.89;-0.78;-0.62;-0.58;-0.43;-0.43;-0.16;0.07;0.09
D17H6S53E	0.0807868	ACCTCAAAGTGGATCAACTG;GGGTCGAAAGAAATCAACAA;GCTGCTGCGTTGGTTACGGG;GGTGCCTAGTCTCCCTTGAG	-0.44;-0.33;0.17;0.93
Efhd2	0.0865743	CCTCAAGAGTATGATCCAGG;GGCTCCCGACGAGACTGCCC;CGGTGTAGGGGTTGAAGACG;CGGCGCGCGGACCTCAACCA	-0.53;0.19;0.24;0.44
Gm6091	-0.138613	AGGACTCCTGGGTCACATCG	-0.14
Efhd1	-0.145313	CCTGAAGAGCATGATCAAGG;AGGGATTGAAGACCTTAGAG;GGACGGCTTTATTGACCTGA;GTGCGGGCAGAGACCGACCA	-0.85;-0.21;-0.16;0.64
Eddm3b	-0.17898	ACATGTTTGTTTATATGACA;GATGTCCTCTCTAAAAGCCT;TGGAAGTGCTTTGGGCAAGT;TCACGGCTTTATCTGTCATG	-0.39;-0.38;-0.24;0.3
Zcchc13	0.291722	ACCACAGCGATAACAAACAT;TGAAACTGGTCACTACGCCA;ACAGCAAGAGGTCGTACCAG;GAGAAGAGGACACATAGCTA	-0.49;0.34;0.57;0.76
Zcchc12	-0.259697	AGTGTTAACAAATTTACTAT;TTAACTCTAGGAAATTGGGA;CTGGCTGAGCCAAGTAACTG;CCTTAGAGGCCCTGCCCGCG	-1.94;-0.01;0.36;0.55
Krt28	-0.206022	AACACCAGAGACATTTCCCA;CAAGTATCATCTAACCATTG;CTTTAGTCGGAAATCGTCTG;CAACATGCGAGCAGAGTACG	-1.3;-0.52;0.47;0.53
Zcchc10	-0.343026	GTCTTCTGAAGAGGATGAGG;TGCATCGGCTCATAGCTCGA;CCTACACAGACCTTCGAGAA;TTCCCTTTGTCCCTTAGCAT	-0.56;-0.49;-0.24;-0.08
Zcchc17	-0.24283	CCAACATCTACTATCTCAGA;AGGACGACATGTGAGTTCGA;TCCATGAAAGTTGTCAACCA;GGTGAAGCTGATTGGCCGAG	-2.75;0.25;0.59;0.94
Gm34733	-1.12047	GGCTATGGCTGTGGCTATGG;CACAGCCATAGCCATAGCCT;GGAGGCCTGGGCTGTGGCTA;GGCCACCATAGCCACAGCCC	-2.17;-1.38;-1.11;0.18
Olfr1274-ps	-0.573992	CAACAATCAGCAGACCAATG;CAAGGACTGTACACACCTGT;CATATCTGTATGGGGCTGCA;GACAGCCCCAAAACTCATCG;AATCAGCAGACCAATGAGGA	-1.1;-0.65;-0.43;-0.42;-0.28
Zcchc14	-0.242369	GTGTGGACATCCATGTCGAG;GCTGGCATACCGGACCCAAG;TGTGCACGGAGTTCAGCATG;AACTGAAGAACTTCCTAACG	-0.55;-0.28;-0.1;-0.03
Krt23	-0.151213	TGAAGGTGGACACTACTCCA;TGTCAATGAGCACGACAATG;AGAAGCAGTCCCCTGCTAGG;TGGAAACCCGTATACTAAGG	-0.8;-0.03;0.01;0.22
Krt20	0.332514	AGGAAGTTGAGGTTCTTCGC;GTAGGAGCTATAGTCTCGGA;GAGGGGAATGCGTATAGCTG;CAAAGCCGTAATGAGCTACG	-0.51;-0.26;0.54;1.56
Zcchc18	0.0340403	AATGCATGCGCATAATGAGC;TGTTGGCAATCAAAGGACCA;GAGAGCAGTATAACAGCGCA;CTGGCTAAGCCAAGTCCATG	-0.76;0.23;0.23;0.43
Krt26	-0.390918	CAACCGACTTGGAAATACAA;GAGGAAGCTTTGCCAGCGAG;CAACAGATTTCAGATGACGC;CATGGCGGTTAGATCCACGC	-1.31;-0.19;-0.15;0.09
Krt27	0.0571265	AAATGACAACGCAAGACTGA;GCAGAACCGTAGGGACGCCG;GGAGAACGTGCAAGCACTGG;CCTGTGCAGAACCGACCTTG	-0.33;0.08;0.15;0.32
Krt24	-0.00735115	CCAAACTACTGAATGACATG;CTCTGCAGATTGACAACGCT;AGGACTGGTATGGCAAGCAT;CTAGCTATGGAGGTAGTATG	-0.42;0.01;0.07;0.31
Krt25	-0.378846	TTGCAGGTACGAAAACGAGC;TCAGTACGAAACCCTGAGCG;GCTGCAGCAGCAGATCACCG;AGCTGGAAATGCATGTGGCG	-1.91;-0.16;0.07;0.48
Ppp1r18	-0.228555	ACAGAGCTTGATACAGCTGG;GAGCCCAAGAGTCAAGTTCG;TGACAGTCCCAAGAGAAAGG;AGCAGTCTCCACTTCGCTCG	-0.66;-0.37;-0.19;0.3
Tcof1	0.275848	TGAGGACGATTCTGATAGTG;ACCTGCTAAACCAGCCAGGG;TTCTCCAGATAAAACCTGTG;GTCCCATTGTAAGGCAGGAG	0.0;0.02;0.49;0.59
Dnaja2	-1.37883	CTTACCTTCTCCATTACAGT;CAGAAATGCAGCGCTTGTCG;AAATGGCAGAAGAAGAGGCG;AAGGCATGAAACATGGACAG	-2.04;-1.34;-1.34;-0.8
Dnaja3	-1.99515	TCTTCCTGAACAACTCCTCG;AATAAGAAACGTACTTCCTG;GCCACCACATCTCCGACATG;GTTGCCACTACGCCCCCCTG	-2.94;-2.42;-2.24;-0.39
Dnaja1	-0.864855	TGATAAGAATCCAAATGAAG;CTGTGTTTAGGCATGAAAGA;TGTTTGTATTGCTATAGGCG;TAAAACCGTCTAGGCCGAGG	-2.48;-0.68;-0.31;0.02
Dnaja4	-0.377005	AGAGACATCTATGACCAAGG;GCACAATTATCACATCGCCA;CTTGAGCGCCAGCTTCCGAT;ACTGTGTGCATCGAGTGCAA	-0.86;-0.59;-0.39;0.33
Sgf29	-1.73304	TCAGCTGATCAAGCAAACCC;CACAACCGCCAAGACTGATG;TTTGGCCACATAGTCCCCTG;CCAGGTTTCCCGATCCAGAG	-2.08;-1.95;-1.53;-1.37
Gm19402	-0.43404	GCAGTCATCCACCTGCCAGG;GCTGGACATACAGCTCACTG;CAGCAGAGGGTCATACAGCA;TACTGACTCCTCCTGGCAGG;GTGACCTAAGCTATGACAGG	-2.0;-1.36;-0.16;-0.05;1.4
Acer2	-0.371604	TGGAAGTCCCAGAATCATCA;TGAAGCACGTTGCGTACTGG;CGTGTTGTAGAACTCGGCAA;AATGTGCGTGTGTTTAAGCT	-1.57;-0.53;0.02;0.6
Acer3	-0.342068	TGAATTGCACCAAAAATTGG;ATACAGTTTAACAGTAACTA;ACAGAACTCAGCGACGAACA;TCAGGTCATGTATGGAATGT	-0.8;-0.77;0.08;0.12
Acer1	-0.474834	TGACACTCCATAGAAACACC;CGAACTTGGGAAAATAGCAA;GAGAGCATATGCATTGACTG;CCGAGTTCTACAATACGGTG	-1.96;-1.1;0.57;0.59
Recql	-0.309118	AGACCAAGGTTCATACACAG;TTGTCAAGCTAATTAATGGA;TATTCTGTATTACGGCTTTG;TTCCCAACGCCTCACTGATG	-1.5;-0.5;0.38;0.38
Psma8	-0.13775	CAAGCGTGGTAAGTCCCGGA;TGGGGTAGAAAAAAAGTCAG;GAGTGGTGATCAGCAGAGCG;CGGGGAGCAGCTTACCGCGG	-1.1;-0.14;0.05;0.64
Alppl2	0.291896	GATAGGCTACAGTTTCATGG;AATGCAAGTTATTACCCATG;GTGCATCCGAGTACCAACCA;CAACACGACATGGGGTAACG	-0.68;0.43;0.66;0.75
Lactb2	-0.951023	ACTGCATTAAAAAACTTCGA;GGGAGTTCATATAATCATAG;AGGAGAATCCTCATTGACAC;TGCTGTGTCAAACTCAACCA	-2.5;-1.08;-0.3;0.08
Agbl4	-0.0619847	AGAAGGTGATATTCATCACA;TTGAACCAGACTCGGAAGCG;TGCCCAGGTAAACTCCATCA;CCATTGGTGCCATCCCATCT	-0.35;-0.02;0.02;0.11
Agbl3	-0.906886	TAATTACACATCGCTCCTGA;GAGACACCATATAAATCTCG;CCTGCTAGTCTTTACAATCG;TTTGTGTATTCCCGAGTTGG	-2.24;-1.71;-0.22;0.54
Agbl2	0.230132	CCAGAATAGGAGGCAAACGA;CCCAAGAGCCTTTACGCAGT;AAGATGGCCAATCGAATGTG;GAGCCATTCAACATGTACCG	-0.96;0.36;0.73;0.79
Ccser2	0.0643243	AGCCATCCTATAAACCAACG;GTTCCATCAGAGCTATCGGA;GATAGATTTAGCATTGTCTG;ACCGGAGAGGCACTCGAACG	-0.72;0.03;0.47;0.48
Ccser1	0.0707732	GAGGAACACGTCAAAACCAG;ATTGGCTGAACGCTTTAAAG;GGAGGTACAGGCTAGAAGGT;AAGGAAGATATATAGAGCGG	-0.16;-0.13;0.16;0.41
Stard8	-0.0914713	GGCATCCTCAGCCTATACGC;CAATGGTTCGACCACATTTG;GTGCGCTGCACATGAATGAG;CCTGCATGGTCTGGTAAGCG	-1.35;-0.05;0.3;0.73
Stard9	-2.30376	AGAGTGGGAAGATCATCACG	-2.3
Stard3	-0.0978436	GTCTTAGTTGCTCAGCAAAG;CTGGCCCTCAGACAAAGCAC;GAAGAAAAGTTTCTCTGCCC;ATGGCCCTACGCTTCTCCAG	-0.24;-0.2;-0.19;0.23
Srp19	-2.66907	TCAGTTTCGAGGCAGAGTCC;ATAAGAAGACCATAGCTGAG;ACGGGAACTGTACAAGACAG;TCCCCATCATACCTCCAGAA	-3.41;-2.95;-2.37;-1.94
Stard6	0.148432	TAAGTCGATAAAGTCTCTAG;CTGGGATTATTCCTTCAACG;CCAACTTCGACTTATATCCG;TTAAATCACAGCTAAAAGTG	-0.65;0.21;0.39;0.63
Stard7	-1.64229	TGAACATTGAAGAACTGTCG;CTCGTCCCATACGAAAACAC;ACATAATCACGAGAGTACAT;GCGGCACTGATTGGCCAGCG	-2.73;-1.79;-1.67;-0.38
Stard4	0.223051	GTGCTCCAGAACATCCAGGG;GAAATCAACAAACTCTCTCG;TAATAGACCATATCCGCCCA;GTGGCGAGTTGCCAAAAAAG	-0.39;0.16;0.26;0.86
Stard5	-0.341848	TGAAATTGTCCAGAGCATCA;ATGGAGTTTCAATTTCCTGG;CCTCTCCATTCTAGGTACCG;CTGTCTTCCAGCTACCCATG	-1.93;0.11;0.13;0.32
Dock8	0.116574	ACTTCCGGTTTGCGACACCG;CCGGAACACGTAGTGCACGT;AGCACGTTTAAGGGATGACG;TAGCGAAGTTCAGTCGCTGG	-0.43;0.19;0.28;0.43
Dock9	-0.2763	AAACCCAGAATTCTACGATG;GTTCATGGTTGCACACCACG;CAGTTTGTCGCATCGAACCA;AATGCAAGAAAAGCGGAACG	-0.99;-0.27;-0.08;0.23
Dock3	0.0994927	TGAGACTGAACAAGAATGGT;TGTATTCGAGAGCCACATGT;AGTCAAGAAGGCGTTCCATG;GGATCATGGACATATTAGGG	-0.66;-0.12;0.48;0.69
Dock1	0.14867	TCAGCTCCATGCGACCGACA;TTAAGGGTCTCAAACCAGCG;AGTGTGAATTCCACTCCACC;ACAGGACGGTCATTTCCATG	-0.42;0.16;0.25;0.6
Dock6	0.55793	CGGGTGCACGGACGACACGG;GCGGGTGCCCCCATACTGTG;CTCCTGTCCATAGCGGACCG;CCAGGATCGAGGCTATAGTG	0.03;0.66;0.72;0.82
Dock7	-0.663913	TCAATAGATGATACTCCAAG;CCTGTAAAATCATACAGTTG;ACTTACTGTATATCCGACTG;GAAGTCGAGATCAGTACTGG	-2.29;-0.65;-0.01;0.29
Dock4	-0.418055	ATGAAATCCTCGATCTGCGA;ATGCCATTCTCCCAACACTG;CCATATTGGAGATCACTAGT;GGTAGCGGGTAGTATCCTGA	-1.28;-0.67;-0.25;0.53
Dock5	-0.178787	GAGAACTACCTAATTCGCTG;CTCAACCAAACCGGACCACG;TCACGTGGGAGGTTATCAAG;AGTCTCGGGTACTCTACTTG	-0.55;-0.31;-0.01;0.16
Gm39506	-0.123028	CATGTTCGCCGTCGTCGCCG	-0.12
Hsd17b12	-1.83163	TCTTATTTCAGTGAACAACG;TGTTTGCAGTTAGCAAAACG;AGATTGTCAACAATGGAACT;AAAAATTCAACGTTGAAACA	-2.62;-2.35;-2.0;-0.36
Hsd17b13	-0.468484	CACCACAAACACGTGCACGA;GAGATCGTGGTAAACAACGC;GCAGACCGTTCTCATCACGG;GACTTACCCAAAAATGTCCG	-2.45;-0.68;0.2;1.06
Hsd17b10	-3.24596	TTGGTCGCGGTAGTAACTGG;TGTTAATGATAACTCCACGT;GTCACGACTCACATTTGCTG;GCTACGGCCAAAAGACTGGT	-4.02;-3.45;-3.25;-2.26
Hsd17b11	-0.420535	AGCATTCTGGTAAATAACGC;AAGAAGAAAAAATCTGTCGC;CTGATGCCACAGTGACAATG;CCACCACAAAGGGATGGGCC	-1.6;-0.31;-0.2;0.43
Hsd17b14	-0.266023	GGGGACATACACCTTGATCA;TTTCCTGTGTCACGTCACCG;CCAGGTGACCAAATCGAGAG;GTCCCAGGCCCTTACCTACG	-0.86;-0.61;-0.59;1.0
Gm31087	-0.640292	AATGGCGAGTGAAGTAAACC	-0.64
Gm20498	-0.54662	TAATTGTCACAGCATCGTAC;AACTTTAGAGTCAGAGTATG;TTTCAGTTGCTGGTTGTTGG;CAGTATGTCTCCAACGACAG;CTACGTCAGCCGTATCAAAG;CGAAGCCATTTCTCACCGAG;GGTGGATTATTTAGTCACGG	-3.42;-1.21;-0.74;0.01;0.32;0.52;0.7
Cngb1	-0.054685	TCTGTACGTCACACATCCCA;GTCCGACCAGGCAACCACTG;ACAGCCACAAGATGTACATG;TGGATCGATGCTAGCTCTGA	-0.53;-0.02;0.03;0.31
Cngb3	-0.998872	GGATCAATAGTATATCACAA;ACAGTTCCAGTTATACGCAA;TGCCCACCTACACAACCTAG;CGAACTTTAATTACTATCGG	-1.51;-0.93;-0.92;-0.64
Fthl17-ps2	-0.552115	ATGCACCTGCAGAATAAGCG;TGCCATCGACATGTACACGT;TCTCCTGAGCCACGTCATCA;ATAGAGGCACAGCTGGATGT;AGCCTCCACGCTTATTCTGC	-1.46;-1.31;-0.39;0.17;0.24
Fthl17-ps1	-0.439486	ATGCACCTGCAGAATAAGCG;TGCCATCGACATGTACACGT;CATAGAGGCGCAGCTGGATG;AGAACGTGACAGCTGGCACG;CCAGAACGTGACAGCTGGCA;TCTCCTGGGCCACGTCATCA;AGAAACGCTTGAAGTTCTCC;GAACTATGACTGGCAGTGTG;TGACCGTGATGACGTGGCCC;AGCCTCCACGCTTATTCTGC	-1.46;-1.31;-0.61;-0.59;-0.42;-0.42;-0.08;0.08;0.18;0.24
Cox20	-1.51785	TAGCGAAATTATACCTACAG;CGCCCCGGAGCCCCACGAGA;AGTATAGATTCTCGAGCACA;ATTAGAAGATCATGTGATGT	-2.49;-1.64;-1.3;-0.64
Gm2001	-2.00057	GTGGTTTGCAATGACCGTCT;TGCAACACCGATGATACCAT;TAAGAATGATCTTATTCCAG;TGACTTGAAGAAACTGATAG	-2.69;-2.44;-1.88;-0.99
Nup214	-2.32735	GTATTCACTAGACATCATGC;GCAACTAAAACAGTAAAGCA;ATTTCACGTACTGGTGAAGG;CAGTTGGGCCTGTTTCGCCG	-3.34;-2.22;-2.07;-1.67
Nup210	0.325086	CTCAAGATAGAGCTCACGGG;GTGCTGCTGGTAATTCCGGG;GAAGTCCAACACACGGACGT;TGCTAAGAATGTTCGCCCTG	-0.22;0.3;0.46;0.77
Gm2002	-0.872507	AGACATAAGTGCCTTCATCA;TAGGAAGTAAGGTAGCGGGT	-1.05;-0.69
Cyp2c67	-0.52102	TGTCCTTCATATCTATCAGG;AAGTAATCAATGAAGTCCCG;TCTTCACAATCAATACCTTG;TTATTGATTATTGTCCAGGA;GGAAAAAGGCATTGAGCACA;TACTTACATTGGTAAGGCAC;AAAGAAGCCTTCATTGACCA	-2.1;-1.28;-1.23;-0.58;0.27;0.54;0.73
Olfr1158	0.0338808	ATACTGTAATTATGTCCAAG;CTATGAAGGACAGCATCCAG;ATGTGTGTAAGTATCAAAGC;TCAAATCCACAAGTAATTTG	-0.6;-0.26;0.25;0.74
Msmp	0.125556	TACAATGGAAACAGTCCTTG;TGCTAACTCCCGGGTGCTGT;CAAGCCAAGGGGATCCTCGG;CTAGCTCCCTGCCACTACGA	-0.47;0.09;0.32;0.56
Olfr1154	-0.0908314	CTATGAAGGACAGCATACAG;CAAAAGAGTCTGTACTCACC;TCAGATCCACAAGTAATTTG;TACACATGACATTATACTCG	-0.31;-0.06;-0.02;0.02
Olfr1155	-1.35212	TGGTCCTATCTTCTACAACA;AACAATAAAAAGCAGTAACT;GGCAATCTACAGCTTCAGTG;ACACAGTAGTCATGTCACAG	-2.18;-2.09;-0.75;-0.39
Olfr1156	-0.480289	GTTCACTGATATTATCAACC;GTGACAGTCATAGCAAACCT;GAGCAAGCAAGACTTAAGAG;CAGTACAAGACGGAGCTTTG	-2.01;-0.22;-0.06;0.37
Olfr1157	-0.111016	GAATTGGACCATACATGCCA;GAGAACACATTGATGCACAC;TGATAGCCGTATATAGTAGT;AGAGAACACCACTCAGCTCG	-0.53;-0.41;-0.07;0.57
Olfr1151	-0.160428	CACTGTGAACATGTCTAGCA;CAGGAGAGCAGGTAAAGTGG;GATTGGCCCAAAAATGCTGG;GTGTCTACTGCTAGCAGTAA	-1.01;-0.27;0.07;0.57
Olfr1152	-0.471704	GTGTACTACAGCATCTACAA;TGCAGTAGATATGTCCAGCA;TGGCAATGATGGCGTTTGAT;CAGGAGAGCATGTATAGTGG	-1.96;-0.66;0.04;0.69
Olfr1153	-0.234537	TCCCAAGAGAAGAAACTCAG;CAGTAGCACACACTCAGCAT;TGCGGTAGATATGTCCAGAG;GAACAAGATAGTAATAGGAG	-0.91;-0.8;0.14;0.63
Slc23a1	-0.213132	CTCATCCAGTCCCAACATTG;ACAGGCATAGTAATCACCGA;AGGCTCGAACTGATGCCCGA;CTGGCATCCTCGTATCCGGG	-1.0;-0.26;0.02;0.38
Slc23a3	0.30037	ACCTACCTACCGAAAGGAGT;GGGCACTATAGGACTTCTAG;GGAAGGCCCACACACCCGAG;GACTCACTGTGCCTACGTTG	-0.37;-0.19;0.8;0.97
Slc23a2	0.2245	CTGGCATCCCCGAATCCAAG;GCGTGCATAGTAGCCATAGT;GTGTTTCAGTGGCACGATCG;ACAGGCGTAGTAGTCACCGA	-0.39;0.02;0.22;1.05
Trdmt1	0.142279	ATACAAACAATAGAAGCCTG;TATCGCAGCAATAACTTGGG;TCATATCCCTGCACATGTGG;AGGGGGATATGACCGATCCA	-0.59;0.08;0.12;0.96
Slc23a4	0.34622	ATGGCCCGTACAGACACCAA;CGAAGCAAAAGAGCCACGAG;AGCGCATGAGAAAGCCGATG;ACAGGGCAGAAATCCCCCAG	-0.14;0.29;0.62;0.62
Bbx	-0.101172	CATGTACACCATCGAAGCTG;AGAACCCTTGACCCCTACCG;TCAATGATCATAATTCCGTG;TTAGATCCTACTCAGATGGG	-0.63;-0.57;0.02;0.77
Mrgprg	0.230888	AAAAAACGGAATGAGTCTGC;CCTTCTTAATGTGCAGACCG;TACGATCGTGTCGGGCCATG;AGGAGGGGAACATGTAGGCG	-0.46;0.11;0.36;0.91
Dusp19	-0.0944876	TGTCTCCACAACATGAACTG;AAGTTGGCGTTATTAAGCCC;GGAGCTACTGAGAAAGCATA;AGAAATCAAAGCATTCTCCC	-0.75;0.03;0.17;0.17
Dusp18	0.107486	GGTAGCAAACACCTTCTACG;GGCATGGTACTTCATGAGGT;AAGAGCCTGTTTATCAGCAA;CTCCACCGAATGGATACGGT	-0.94;0.08;0.49;0.81
Dusp15	0.0617577	TCCAGTCACCGTCATCACAT;CCCATCGCCAACCCAAACCC;CACTCCTGCCGCCTCAACGG;GCCAAAGACCCGGATCAGCT	-0.89;-0.27;0.49;0.92
Dusp14	-0.180951	TCATCAGGTACGCAATACAG;GATGGTGGCATTGATGACGC;TCTCCCTCGGAAATCATCCG;CAGTGTGAGCAAGAAGCACG	-0.86;-0.21;-0.14;0.48
Dusp16	-0.00865029	AGATTGGGAAGAATTCGAGT;TTTGTGAGAAAATCCTACCA;CAGACTCACCTGCAAGCAGG;TATTGTATTCCACAAATGGT	-0.8;-0.56;0.65;0.68
Dusp11	0.10174	TATTTAAGCCATGGGTGCAG;GCAGAAACCACATCCCCGAA;TCAGCGCTATTATAAAGTAG;TGATTGATGTAGAAGGCATG	-0.34;-0.1;0.27;0.58
Dusp10	0.233551	ACTGTGCCGATAAGATCAGC;AGACTGAGGTAGCATGCTCG;AAGGCAAAGACTCTTTCAAG;GGTAGCTTGAGTCTAAACAA	-0.02;-0.01;0.21;0.75
Dusp12	-1.67	GACCGTCCGGAGGATGTCGT;GACCCAACTACCATTTCACA;CCAGTCCCGCCAGCTCGGCA;ACCAGTGCACCAACACCGCG	-3.1;-2.53;-0.58;-0.48
Sgpl1	0.0819675	GGGAACGGAAAGCATCCTGA;ATTGCACCAAATATGAGCCC;ATATAAAATCCCACTCCATG;AGGCTTATGGAGAATTCACG	-0.37;-0.26;0.45;0.5
Gm26793	0.0959101	TCGTCTTCAGAGCGACCGCG;TCCAAAGATTCGCTACTCGG;GCGGTACCTCTGCATGAGCG;AGCCGTCGCTCCGGATTCGG	-0.35;-0.23;0.22;0.75
LOC100861969	-0.872507	AGACATAAGTGCCTTCATCA;TAGGAAGTAAGGTAGCGGGT	-1.05;-0.69
Rybp-ps	0.072048	ATCCCAAAAGCCTTCGTCTG;TGTATGCTGTTAGCTTCACT	-0.08;0.23
Slc20a2	-0.169512	ATACTGTACACAAAGACTCG;ATGGTAGCAGCATAAAACAG;GCCTTACCATAGGAAGCCCG;AAGTGGCGATATAAACCAGG	-0.68;-0.58;-0.13;0.7
Slc20a1	0.126586	TCAGTATCACACCGTGCACA;GTAGAAAGGTTACCTTACGG;GCCACATATTGCCATAGTGT;CCGGAACGGCTTGATAGATG	-0.67;0.05;0.53;0.61
Cadm4	0.132069	TCGTCATTCAGAACCCAGCC;ACAGACCGAGAATGTGACTG;GTGGATCGCAAGGACGACGG;GAGCGTGGCGATCTGATGGT	-0.25;0.2;0.26;0.32
Cadm2	-0.685422	TCCACTAACTCAGAATGTCA;CCGCCACTCCATCATCGCTA;ATGATAACACCTCCCTCCAG;GACGAAAATCCACTAATCTG	-2.03;-0.92;-0.06;0.26
Cadm3	-0.592989	CTGAATCCGATTATCTCGAA;CTGGTTATAAGTCATCATTG;AGCTGTTGTTACATTGTGAG;GACATCTGATGAAACAGTTG	-1.7;-0.52;-0.32;0.17
Srcin1	-0.0377548	TTTGCGTTACCTCAACGACG;ACTCTCAGCAAAGACCGACG;GTCAGGCAGTAAGAGTAGCG;GGGCGACTTAAGCATGCCCA	-1.2;0.14;0.27;0.64
Cadm1	0.241536	AGCCAGCGACGACCATCAGG;ATATCGATCATCAAGTTACG;ACTGACGAATGTCTCAATCT;GCCGCGGCACTGATCCCCAC	-1.06;0.58;0.64;0.8
Eif3j2	-1.39537	AGCAATTAGCAGATAAACTC;GACCCGGTGCGGAAGGTCGC;GGCAAGAAGAAATTAAAAAG;GGACTCAGACTCTTGGGACG;CGAGGACGTGAAGGATAACT	-3.57;-2.09;-1.95;0.18;0.45
Eif3j1	-1.76363	AGCAATTAGCAGATAAACTC;GAGGAAGCAGAAGTCAAACC;GACCCGGTGCGGAAGGTCGC;GGCAAGAAGAAATTAAAAAG;CTCGCTCTCTTCCGTAGACG;CTTGTGCCTTCAGGATAACT	-3.57;-2.15;-2.09;-1.95;-0.63;-0.2
Spin2c	-0.258363	GAGATGAGCCGATCACACAG;AGAACGACACCTTATCAGGA;TGATGGTTGTAGAGCCAATG;TCATCCCGTAGGAGCATCGT	-1.81;0.01;0.17;0.6
Spin2d	-2.22383	CCTGCCCAAAAGGAACATCG;CAATCCCATCATATTTAACC;GAGATGAGCATATCACACAG;ATCATATTTAACCAGGTACA;CCTAAAAGTTATCTCCAAGA	-3.19;-3.04;-2.7;-1.32;-0.88
Spin2e	-2.48165	CCTGCCCAAAAGGAACATCG;CAATCCCATCATATTTAACC;GAGATGAGTCTATCACACAG;AAAAGTTATCGCCAAGAGGG;ATCATATTTAACCAGGTACA	-3.19;-3.04;-2.85;-2.01;-1.32
Gmfg-ps	-1.4501	CGGAGCTAAAGGAAACATTG	-1.45
Sptbn4	-0.00432128	GGAACAGTACTACTTTGACG;CGTGGGGTCACATGACATCG;TGGCATCTGGGATATTGACA;AGCCGAACAGTTGTTCGCCG	-0.5;-0.15;0.27;0.36
Sptbn2	0.287801	CCATGACATTAAGCGCATTG;GGAATATGTCTTGTCTCACA;GACGACGTGACTCTTCCAGT;GATGGTCCACACTAGCCCAA	-0.63;0.25;0.39;1.14
Sptbn1	0.185073	GGAGATCCATCAGTTCAACA;ACACGGTCTCGAATTACCTG;AGCAAGACAAACTCAACACG;TGGGCGAGATGGTCACCCAG	-1.7;0.6;0.77;1.07
Cldn34d	-0.302092	TGGGCAACTCGAATATCCAG;AATACAAAGGAACCATGCTA;AAGAACCATACTCGCCATTG;GAAAACCTGCATTTACCACC	-0.62;-0.34;-0.19;-0.06
Cldn34a	-0.199875	TGAGAAACACGAATATCCAA;GCTCTTAGAAATGTGTACAC;CCTCCATGGGCCTCCCACAG;ATACTAGGATAAGAGATCAG	-1.49;-0.15;0.38;0.47
Noct	-0.219945	CAGTGGAACATCCTCGCCCA;TGTTCGGGGACGCGACCTCG;TTGTGTTCCACATCTAGACA;ACAAAATCCCGCTGGTAGCG	-0.77;-0.31;0.08;0.11
C130050O18Rik	0.087991	TAGAGTCACCAGGATACTAG;GCCACAGCCCAGGTTTGTCG;GGACCGTCACAACATGTCCT;AGTGCTGACAGAGCGTTGTG	-0.87;-0.05;0.58;0.69
Dop1b	-0.632045	CGTGCTTAAGACCAATCCCA;CACCTGACACGAGAAATCCA;GATGGCTTCTCGATCCACGG;AAGGCTTCAGATATGCATGG	-1.47;-1.02;-0.03;-0.0
Dop1a	0.171621	CTGATATGTAAAGTTGTGAG;TGTGGGATTACATTGCACGC;TTAACATTATGGGACCAGCT;TGCAGCTGTATGATTCATCG	0.11;0.13;0.16;0.29
Hsf2bp	-0.245068	CTTACCCAGAATACTAAATG;GTCGTCAAAACCATTCTAGG;AAACTGCACAGGCAGACAGT;GATGTTGCCGCCATTGCGTG	-1.06;-0.81;0.37;0.52
Ski	-0.220472	CTGCGGGCTCATCACTAAGA;TGTCTCGAATCAAAGCTGGG;CAGTCCACCCTGCACCACCG;GAGTGTACAACGAACTTGTG	-0.41;-0.38;-0.08;-0.0
Gm2564	-1.34668	TACAGGTTCACCACACTAAG;TCTGGGGGGTGCTAATGATG;ATTAGCACCCCCCAGAGTTG	-2.75;-0.75;-0.54
Slx4ip	0.453969	AATAATCAGACACTCCATGG;TCCAGAGTTAAGGAGTATGT;GTGAGCAAACCACAGCCCAG;GAAGGTGTATCCCTCTCTTG	0.08;0.27;0.53;0.93
Krtap11-1	-0.0155841	CTGTCGATTGCAAGTTACCT;CACAGTATGACTCCTGACAA;GAGCTGGAAATCCCTCCCAG;GAAGTTCTCTGGTAGCACGT	-0.44;-0.39;0.14;0.63
Ramac	-1.17848	ACAATTGGAGGGGACTCAGG;GAAAGATGACAAAGAATACC;GAATGGAATAGCAGAGCTGG;AGAGGTAGGGATAACAGACG;TGAGTCCCCTCCAATTGTTG;ACAACAGACAATTTAGAGGT;GAGGATGGCCAAGTGACAAT	-2.7;-2.35;-1.54;-0.96;-0.4;-0.35;0.05
Scoc	-0.309237	TTTAAAGAGTTGGCGTTCGA;TCTAACCTTCAAGTGTGTGT;GATGGACGGATTGAGCACAG;GAATGCTGACATGGACGGTG	-0.61;-0.58;-0.21;0.17
Adig	-0.259757	TTGCATTTCTTACTTAGTCA;CGCTCACCAGAGGCACCAGA;AAACCAGGAAAGAGAGTGTG;GCAGGCAGAGCCAGAAAACC	-0.97;-0.8;0.15;0.58
Hpse2	0.443904	GTGGTCAACACATACACTCC;AAATCCGGCGAAAAGCCGCG;CAGCCATCATGAATGATGGA;GCTCTGGAGTAAACCCGGAT	0.13;0.33;0.57;0.75
Fnd3c2	-0.685055	GGAGAAACAGAGGCTAACAT;TTTCAACTTCTTGTAACACA;CCTAAAAAGCCATACGTAGT;TTCAGAGTAACAACCATGAG	-1.55;-1.21;-0.14;0.16
C330021F23Rik	-2.6482	CTGAAGGCCAATCCGTTTGG;AATTGTGCTGGAAAAAGTAG;TGCCATCAGGAAGTGCGTCA;GTCGTGGTCTCCGAACTGCC;GCATGAGAGGCACCCCCAAA;TCCTGGAGTCCGCTTTAAGG;CAGTACAAGAAAGCCCACTT;GTTGCTGGATTTCGTCGAAA	-3.55;-3.3;-3.3;-3.0;-2.96;-2.92;-2.8;0.65
Gm16451	-1.40358	GAGAAGTACCATGGAGACAC;TCCACTTCTGGATTCAGTGT;CCACAGTCCCAACCCCAAAC;GAACCAGAGTGACAAACTGA;TCTTGCCACCAGGTGACTGA;TACCAGCATCAAGATAGTAC;TCTGGTCTCAGCTTGGCCTC;GAGGAATAGAGTCAAGGCAT;CATCATAGGCAAACTGCAAG;CCCCAAACTGGCAAAACAAG;TGACAAACTGATGGACACCC;TTGGCCTCTGGCGTCCTGAT;TAGAGCAAGTGTCACAAACA;ACTCTGGTTCCTCTTAATAG;TGGCCTCTGGCGTCCTGATT;AACCTGTACTATCTTGATGC;CAAGATAGTACAGGTTGCTC;GTTATTCTTCTTACAGTTGT	-3.17;-2.56;-2.54;-2.53;-2.46;-2.37;-2.27;-2.23;-1.48;-1.19;-0.89;-0.86;-0.63;-0.57;-0.54;-0.41;0.38;1.04
Rab22a	-0.633673	CGAATATCAATCCAACCATA;TGGCACCAATGTACTATCGA;GCATTGTCGTTGCCATCGCA;GTAAATCGAGCATCGTGTGG	-2.39;-0.33;-0.26;0.44
Cdk2ap1	-0.570563	TCCATCGCTAGGCTACACCC;CAGCAGCTGGCGATATTGGG;GAGGTCGCCATGCTAGTAGA;TCACTCACCGGCGTTGAGGG	-2.0;-0.32;-0.11;0.16
Cdk2ap2	-0.111757	ACTCACCTGTACATACCCCA;CGGGAGTGTCCCATCGCCAT;GGACCAAAGTCGTTAAACAG;GACAGACAGCAGGTCCGTGT	-0.76;-0.28;-0.15;0.75
Speer4cos	-2.91763	CTTCATTACTCTCAGATGGA;AGAGTAATGAAGGACGAAGG;GATGGGAGAGAGACCAGAGA;GGATGGGAGAGAGACCAGAG;GGAGGTGGACTTGGCGAATG	-3.8;-3.34;-2.84;-2.54;-2.06
Adi1	-0.528767	GGAAAATGAGAAACTACTCC;AGATACACTTCCCAATTACG;CTTCGATGTCAGGGACAAGG;ACGAGTCCACCGCCGACCCG	-0.84;-0.66;-0.53;-0.08
Pcsk1n	0.402198	GTGGGGCCATCATCATACAC;ACGGCCCGACGCAAGCGGAG;ACGCGCGCGTTCCTGTCTCT;GCTCCGAGCTCGCCTAGACC	0.25;0.35;0.36;0.65
Pdk1	-0.178713	AAACACCATGTGATAGAGAT;TTGTCGCAGAAACATAAACG;ATGGCTATGAGAACGCTAGG;TTGATAGCCTTATTGTTCGG	-1.24;-0.09;0.29;0.31
LOC102632256	-0.463608	GGGTCTTCTTACCTCCCGTG	-0.46
Pdk3	-0.374554	CTTACTTATCCAAAACTCGT;CCAGCTCTGAACTAATCCCA;TAAGCATGCGGAAAGAAATG;GTTGTTCCTACAATGGCCCA	-1.69;-0.8;0.07;0.92
Pdk2	-0.107872	GCAGTTTCTAGACTTCGGTA;CATAGACCATGTGAATGGGC;CAACTGCAGCGTGTCTGATG;GGTGCTGCCATCAAAGATGA	-0.52;-0.44;-0.24;0.77
Pdk4	-0.256119	TATCGACCCAAACTGTGATG;GCTTAGGTTTGTAGACACGC;GGAACGTACACAATGTGGAT;TGAGCATCCGAGTAGAAATG	-0.47;-0.44;-0.32;0.21
Grpel1	-2.65915	TGTCTGCTTACCATATAACT;GTAGCTGTGCACAACAAGCG;TGGCAGATACTGAGAATCTA;ACGACAGTGCCAAAGCCGGG	-3.49;-3.0;-2.74;-1.41
Grpel2	0.188332	AGACGCGAAGATATTTGGTA;TGCCAAGTGCTGTTCAGAAG;AGGGTCCCAGTCCATCAGGA;GCTCTCTGACATAGCCCCCG	-0.32;0.03;0.32;0.73
Il12rb1	-0.0173061	CCTCCGAACCATACCCACAC;TGAGAAGACATCGTTCCCAG;TCAAGGTGTCACAATCACAC;GTCGGTGAGGAACCAAACCG	-0.62;-0.2;0.23;0.52
Il12rb2	0.0986832	CTATCAGGTGACGTTACAAG;ATTAACATAGTGGACCTATG;AGAGCAGACATGTTGTCCGG;ACTGAGAACACGAACACCAG	-0.63;0.2;0.24;0.58
Ankrd33b	-0.328578	AGGCGAGGAAGAGTACGGCT;TCTCCTGTCTGCTCGCTACG;CTGGTCTGGACCTAGAAAGG;GTACGGGAGACTGACCGCAA	-0.86;-0.39;-0.15;0.08
Scn5a	0.676943	AGTCGAAGCTGGTGTAACCG;GCAAATCCCAGACCTCGGGG;GCATGGTGGACACTTACGGT;CTGGTCAAGATTCTAGCTCG	0.35;0.54;0.91;0.92
Hif3a	0.0973407	GCGCACGCTCAACCTCAAAG;GTCATGGTACTCACCGCCGA;AGTTCACATACTGCGACGAG;ATGTTGGTCACGTACAAGTG	-0.34;0.21;0.23;0.28
Pecr	-0.066506	TCCTGGATGAGAGAGCACGG;AAGACATCACTGCGAAGGGA;CTGTATGGCGGAGACTTCAG;TTTCCTCTTAGGGTGTAACG	-0.26;-0.14;-0.11;0.25
Golga1	-0.616171	CTGTTCTTGAAATTTCCGCA;TGTCATCTGACTTAAACGAG;CTCAGGTGAAGGACCTAGAG;AGCAATGGCTCAAGCCCTGG	-1.58;-0.82;-0.19;0.12
Golga2	0.267886	CGACCTTAACCGTTCCAATG;GCTGTCGGGAGGACTGTAGT;CCTGTGGTACCTCAGACACA;ACCCATCTGACTCCGGAGTG	-0.12;-0.04;0.41;0.83
Golga3	0.384123	CAGCATCAGCAGTAGAACCA;GCAGAGAAACATCCTCAGCA;AGTACCGAGTTAAGCGCCAT;GTTACGATGAGCTACAAGCA	-0.26;0.1;0.53;1.16
Golga4	0.804342	ACAGCTCAAGAACAGTACTG;GGAGACAATTGGGTCCCACA;CAGCCTAGCGAGAATAGCGT;GCAGATAGAAAGCCTGACCG	0.48;0.61;0.71;1.42
Golga5	-0.308718	ACTACAAGCAGAAAGCTACA;CACAGCTCTACACCTAGTGA;GGCACAGCGAACGTGAAAGT;ATAATGCAGGATCACAAGGA	-1.61;-0.21;0.26;0.33
Golga7	0.0104654	AACAGCCTTCAAGATACGAC;ATGAACACCTTCCCGGACAC;AAACTCATTATGAGAAGGTA;ATTCAGCGAGACTACAGCAG	-0.48;-0.03;0.23;0.33
Ring1	0.215066	CAAAATCTACCCTAGCCGGG;CATGGATGGTACAGAGATTG;AGACCGCCACAATGAGTGGG;CCTGCTCCCAAGCGACCCCG	-0.08;0.07;0.29;0.58
LOC115487426	-0.393096	TTGCAGAAAGCAGAGACCAT	-0.39
Tbk1	-0.701787	CTTCTCGCTACAACACATGA;CGGGAACAACTCAATACCGT;CAACATCATGCGCGTCATAG;TGCCGTTTAGACCCTTCGAG	-1.84;-0.77;-0.19;-0.0
1700019D03Rik	0.442541	TGACAAGCTGCATGAGAGTG;GTCTGCGAATTCAAGGATCA;AGGGCACCGATCACAGCACC;CAGCTTGTCAATGTCCAATG	-0.06;0.34;0.57;0.92
Bop1	-2.37061	TGGCACGTTGAAGCTCTGGG;AATTCATCGTACCATGCCAG;GTGGGCACAGATACAAATCG;CAGGTCATAGAAGCTAGGGG	-3.97;-2.35;-1.91;-1.25
Vps13d	-1.41329	CAGATATGTCTGCAACAGTG;CTTCACAGTATCCGATCGAG;GGTGTCTCTCATTGGACACG;GAAAAGGCCGTATGATGCTG	-2.57;-2.17;-0.47;-0.44
Vps13a	-0.139334	TATGGATTATGTACGAACGA;GGAGCTGTTAAACGTTGTAG;GATACCTATGCATGTCAATG;AATGTACGTTTGTGCGAGTG	-0.86;-0.05;0.11;0.24
Soga1	-0.719411	CGAGCTGGCCAAATACCGCT;CAAGTACAGATCGCTCTATG;ACAGCATGATCTCCTTAGCA;CTGCTCCAGGACGAGCGTCG	-1.41;-1.0;-0.39;-0.08
Vps13b	-0.45981	GAAACCTCTTCCCGATACAG;TGTCCATACTACCCAAATCG;TGGCAGTAGTCCATGTACTG;TAAACACTGCAATACAAGCG	-0.5;-0.49;-0.49;-0.36
Gja1	0.00158806	GGGCGTTAAGGATCGCGTGA;ATTCAGAGCGAGAGACACCA;GCAGACCGACGGGGTCAACG;TGAACCCATAGATGTACCAC	-0.39;-0.21;0.27;0.33
Gja3	0.322345	CCTCCACTACGCGATGACCG;AGAAGCGGATGTGCGAAATG;TCAAGACACTCTTCGAAGTG;TGCGCACGATGTGTAGCACG	-0.31;0.1;0.38;1.12
Gja4	0.0849462	ACACAGCACGCTGACCACAT;CTTGGCCATCTGATGTTCGA;CAGCACCCAGTATCGGATGT;GGTCCAGGAACACTCGACCG	-0.53;0.15;0.33;0.38
Gja5	0.0821486	CAGTACCCAATAACGAATGT;CAGGCTGAATGGTATCGCAC;GCAGACATAGGTGTTGAGTA;GGTACTCATAGGCACCAGTG	-0.66;0.04;0.11;0.84
Gja6	0.349403	CAGATACGAAAATGACCTGG;AAATGTACCACTGGATCAGG;GCAGGAGAGCAGTTCAAGTG;CCTGGGCACTGCTATCGAGT	-0.45;0.31;0.34;1.19
Gja8	-0.105601	CAAAGCAGTCTACCACATTG;GGCCTGTAGAGCAACCACTG;ACAGCAGCGGAGTTTGTGTG;GGTACACCACGTTCGCATGG	-0.21;-0.16;-0.08;0.02
Abcc8	0.0181523	TGGACAATGAAGATCATCGG;CAGACCAACGAGATGCTCCG;ATGGCTGCTAAATGCCACGG;GAAACTGGGATTAACCTGAG	-0.47;-0.29;0.38;0.46
Abcc9	0.325493	TCCCTCCTAGATCATAATGG;CATGTTTGTGAGATAGCGGA;ACAAATGGATACTTCTCATG;GACTGCGAATCTGACCACCG	0.01;0.28;0.31;0.7
Cntfr	0.307756	AACCCACATGTAGAAGGACT;AGACGCTCATACTGCACGTG;GGCCGTAGTGTTGTGACCCA;ATACTGCGAAGCTTAGAACT	-0.06;0.08;0.58;0.62
Abcc5	-0.0905826	CATTAAAGAAAAGTCCCTAG;AAATCCGAGAGGAGGAACGT;GGAGCTGATGAACTTAAATG;AAAGACAAGAGGGCTACCAG	-1.17;-0.26;0.4;0.66
Abcc6	0.205189	AACAGGGTGTAGGTACAGAG;TGCACTGCATCGTTCAGGTG;GTGACCGCAACTCCTCGGCG;CCTCTGTGGAGGATCCACCA	-0.28;0.26;0.3;0.54
Abcc1	0.444366	AGCTGTAGGCACATTCACGT;GGTGAAGTACAGATAGAACG;GAGCGGAGGTCGATCAAGAG;GGCTAGGATGACTTGCAGAG	-0.46;0.32;0.95;0.97
Abcc2	-0.207977	GCATTCGGAAGAAAGAACTC;GTTTAAGACGATCATGACAA;ACTCGGATCTTGGTTACACA;AAGACCCTGACTCATATCCG	-1.4;-0.54;0.14;0.96
Abcc3	0.114505	GTCAGTCCACTGATTAACTG;TAGGGTATTAACCTATCTGG;CAATGAGCCAGCCATCTACG;CTTTGCTAATCCAGTACGAG	-0.43;0.06;0.2;0.63
Taco1	0.0325059	GCTGACTCGATGGTTGACTT;CCACTTATTGTGTCCCGCCG;ATTGAGGCGTTATCAAACAG;GCGATGCCTCGGGTTCCGCG	-0.95;0.19;0.36;0.53
Cyp21a1	0.509604	GCTTACCTTGCATCCCCAAG;ATGATTGACTACATGCTCCA;AGGAGATGATACTACAAGTG;TACCATTTAGCATATGGGGT	0.12;0.23;0.37;1.32
Nudcd2	0.482614	TCCTGCGCGCGAGTGCCGGG;GGGTGGCCGCGAGATCCTCA;GGTTCCTTGCGGGACTCCGT;CCCGTTTGAGGAGCGCAGCG	0.12;0.24;0.64;0.92
Nudcd3	-1.99231	TTGGGCATCCTGCAGCACGT;GCAAGACTACACCGACCTGG;CTCTCCATTCTCTTCCACCA;GGAAGCCCATGCGGTCCGAA	-3.43;-2.58;-1.18;-0.78
Nudcd1	-0.468141	TATTCATCTATTGATCACGA;TGAGGATGATTTGACAGTAA;CTGGTGGTTGGTGATAAACA;GGAAGGCGGAACACCTCTCG	-2.62;0.03;0.13;0.59
Gm41465	-1.81354	AAGATGTACCGAAGTATAGA;GTTACTGTAGCATGGAGACT	-2.36;-1.27
Ift74	-1.06918	AAGCATGGGATCGCCAATGG;GCCACTCGAACATTGCCAGA;GTGACCCAACAAGGTTTGAG;ACAACTAGCAGACTACAACA	-3.22;-0.4;-0.33;-0.32
Preb	-1.63321	GACCGGCATAAAGAATGGCG;AAGCACACAACTTTCTGCAG;AGCACAAGTTCACCCCGAAG;GCGGTATGGTGTATTAGAAG	-2.99;-2.42;-1.31;0.19
Prep	0.223863	CTTGCACATATAACACGCGT;GTGATCCAGTAAACCGACTG;CGGACCCTGACGAGTCCAAG;ACTGATCCGTCCCCAAGACG	-0.81;-0.02;0.41;1.31
Pex11a	0.135048	AGAGTCTAAAGCTGACAAAG;ATTAGCCAACCTCAACCGCG;CAACATGCATGCGTGCTGAG;GTACTTAGGAGGGTCCCGAG	-0.36;0.0;0.29;0.6
Slc25a23	-0.0171409	GTTATACCCTCAGATCAAGC;CAACCGGCTTAACATTCTAG;TCAGAGACATCTATGTGACC;GCAACTCGTGCACGTCCACG	-1.03;-0.48;0.42;1.02
Gm10142	-0.624871	CATTCCTGTTAGATACCAAG;GGGCTGGACACACAGCAAGA;GGAGGGGGCCACACACACAG;ACACACAGAGGACTGGCAGG;GCATGCTGACTGGCAGGAGC;GAGCTGGACATGCAGCAGGA	-1.3;-1.16;-1.11;-0.6;0.17;0.25
Gm10147	-2.09012	TTCAGATGAAGAAGAAGAGC;TAGAGACACCAATGGAAAAC;CTGTGGGTGATACCAAAGGA;GAAGAGCAGGCTCATTCTGA;TCATCTGCTTCTACGTGAGG;ACGTTCTGTAGAGACACCAA;ATCCAGTAACTCATGATGAT;AGACATGCATGAGAAGTCCA;GAACAAGAAAAATCAGTGGT;ATAGTAAAGAGGCCAGCATT;TGTTGGATAAATCTGGAGGT;CATGCATGAGAAGTCCATGG;TAAGTGGTGAACAGCAAGTT;TTCCCATCATCATGAGTTAC;GTGTGAGCAGAAGTTTGATA	-2.92;-2.73;-2.67;-2.65;-2.58;-2.57;-2.44;-2.37;-2.03;-1.99;-1.95;-1.93;-1.26;-0.82;-0.44
Gm10146	-2.20012	TCTTATCGATGTACTTGGAG;ATTCGGGTGAAGTTCCAGGG	-2.52;-1.88
Higd1c	0.387577	ATTTAGCTTGTAAAGACCGT;CTTGGGCGGCAACCCGCACG;GGGAGTCTCTCGATTTCCGG;AAGGTGGGTACTTACCCACG	-0.56;0.37;0.45;1.29
Higd1b	-0.163246	GAAGTTCCTAAGGAAGACCA;TACTCACCTATAGGCACCAG;ATTTACCGGCTGAAGGCTCG;TCTGGTGTGAATCAGATGGA	-0.92;-0.31;0.24;0.33
Pex11b	-0.673638	GGCGAATCTCATAAGCATCA;ATCTCAGAACGACATCTGAC;CAAAGTACAAGGCTCGGTTG;CTCTACAAGTGCTACGCCTG	-1.41;-1.11;-0.14;-0.03
Pex11g	0.124057	TGCCCCAACAGGTCCGAAGT;TTGCTGCCAGCTGATCGGTG;GTTGGTCAGTCACATTACTC;ACCAAGCAGAGTCCACCCGG	-0.54;0.32;0.35;0.37
Gm11437	-0.693018	GAAATTCACACAGATACCAA;TCCTATGATTCCAACAAGAA;TCCAGAGCCAAGACACCGCA;GTTGTGGAAGAGGTAGTGAT	-2.09;-1.43;0.37;0.38
Ap4m1	-0.422342	TTTATTCACATCAGACACAG;GGGAACCATCTCACGCAATG;TTGTTGAAGGTGGACGTCCA;GCCAGGGATTCGAGTTGATG	-1.67;-0.98;-0.14;1.11
Ssx2ip	-0.21254	GTAGAAAAACTCGATAACCA;CCTTTATCCAAAAACGTGCA;TCTATATCGGAGATAGCCTA;ATGGCAAACGAGGCTCATGG	-0.58;-0.56;-0.23;0.52
Atg9a	0.00270924	CTTCATCCCAGACCAGCACA;AGATAAACTTGATAAGCCGG;AGGCCGAGTACAAACGTGGA;CTCGGCTTGCTGGTACACTG	-0.72;-0.11;0.39;0.45
Atg9b	0.265501	TACAAGCGCAGCGACCTCCG;AGTGCTCACCATCTACGATG;CAGGTAGCGTTAGCCAACAA;GATCCACGACAGTCCCCTGT	-0.14;0.01;0.03;1.16
Blnk	0.274708	CTATGCAGGTCGAAACAGTG;GATATTAAGAACAATGAAGG;AAGATAATCGATCCAGCCAG;GTCTGTGACTAGACCCTCGG	-0.14;-0.03;0.5;0.77
Gm15531	-2.35554	ACAAGACTACCGTTTGTGCA	-2.36
Ahrr	-0.100866	CCTCAGCGTTAGCTACCTCA;AGAGCACTACCAAGCTGACT;CTTCTGCAGACAGCTACACT;ATGCAGAACAATGAGAGTCG	-0.48;-0.25;-0.24;0.56
Bhmt2	0.15645	TCACACAGAATTCTTGAGAG;CCATGTGCATCGGCCCAGAG;AGAGAGGCTTCGTGAAGGCG;TGAAGACAATATGGCCAGCA	0.09;0.16;0.17;0.21
Nt5dc2	0.439573	CAGTGGATCGAGCAAGACAT;CAGAAAGTAGTCCACCACAC;GAAGTGATCGACCTGTACGG;GGCACATGGTAGGTCCCGAT	-0.23;0.25;0.79;0.95
Nt5dc3	-0.856763	GTGCTTGGAATAGAATACCA;AATGTACCGAGCAATCGAAG;GAAGTCATAGACATGTATGA;CAAAGGGATGCGGTACATCG	-1.78;-1.02;-0.58;-0.04
Gal3st2b	-0.692607	TACCGTGTCACAAAAAACCA;ACCGTGTCACAAAAAACCAG;CTAGCGTTGTAGTACTTCCA;CCACATGCAGGAAACCAACC;TGTTCGCAAGCGCCTTGCGG;CATGCAGGAAACCAACCAGG;TGGCTGTCTTGTGAGTCTTG	-2.05;-0.99;-0.81;-0.48;-0.26;-0.24;-0.03
Nt5dc1	0.0877035	AGTGGTGGACTCTTTAACAA;CCTTTGGCAAGAAGGAGTGG;AACCGGGCTGGTACTCCCAA;TTCTTACAGACTCAGGACAG	-0.46;-0.32;0.29;0.83
Ugt1a10	-0.614868	GTGGAGAAACTCATTCAGAG;GAACATAAGAAAGAAGACTC;TTGTACAGTGAAGACTTACT;GAGGTCTGTCATAGTCACTG;TTCATGACAGGCTCAGCTAG	-1.04;-0.99;-0.92;-0.24;0.12
Sbsn	0.296263	GTAGCCCACGACATCAACAG;GGCATGGTTATTATGCTGCG;TGGCAGACAAGTTTGGTCAG;GCAGACAAGTTAGGTCATGG	0.03;0.32;0.34;0.49
Olfr849	-0.390513	TAATAACTGTATACTTCAGA;GGGAGTCAGAGCTAACAGCT;GCAGCAATATCATCAAAGTG;AGATGAGATAGACTTGAGAG	-2.01;-0.8;0.44;0.8
Olfr845	-0.402273	GCTCTTGAACATCCAAACAC;GCATCTGAATTTCTGCACAG;ATTGACAGCACTAATAGCCA;TGACTGTGTACCTCAGAGGG	-1.78;-0.25;-0.11;0.53
Olfr846	-0.622287	GCTGAAGAACATTCACACAC;AGCAAAATTCAGAACAAAGC;GCTAACCAGTGATCCTACAA;ATTAGCAGATCACAGAAGTG	-1.8;-1.13;-0.13;0.56
Olfr847	0.15939	TACAGTGTCTGATGATACTG;TTGGGACAGTGGTTGTACTT;ATCAGCAAACCACAGAATTG;AAGATGAGGGGCTCTACTGT	-0.03;0.09;0.15;0.43
Olfr843	-1.41449	AATCAATACAAAACACACCT;TGGTAACAAAATATATAGAC;ACTTATACAGATGTCAGTAA;TGGCCATAGTTCATCCTCTG	-2.1;-1.54;-1.42;-0.6
Ltn1	-0.195167	TTGATTGGAGAAGTATACGT;GCATTAGCTTTGTCAACGAG;TCATGATCGCCGTGTTCGAG;AATGCAGCAGAACTTAGGCG	-1.41;0.03;0.17;0.43
Gtf2a1	-0.664059	AGTGGATGAACAAGTCCTGA;CTCATTCCTGCATCCCAGCA;ACTGCCTGCAGGAGTGACTC;TGAAATCCCTCCAGGAAGTG	-2.01;-1.55;0.15;0.75
Gtf2a2	-2.006	AACTTGAAGCGCAAGCTGGG;CAGGAACAGAGTCAATTTCA;GTTATACAGAAATACAACTT;ACAGATTCTGCGATAATGTT	-3.1;-2.82;-2.14;0.03
Isg20	0.418072	TGTCATACAGGACTGCGCCA;CTACAGAACCCAAGTCAGCG;TGACAAGTACATCCGACCCG;CCTGGCTTCACCAAATGGCG	-0.45;-0.09;0.78;1.44
4930596D02Rik	-0.0274931	TGTATGTGGAGAGAAATGCA;AAAAACAACAGGGAAGGCCG;GAAAAAGCTGGTGAACCACT;GGGCGGATACATTCTCACCC	-0.55;-0.13;-0.09;0.67
Gm12169	-0.0921034	TATCAGATGTGCATTCACCT;CAATGAAGAGGCCTCTAATG;AAATGCGTCCTTGACAATCG;TAAGCCATTAGACACCGGAT	-0.25;-0.17;-0.07;0.12
Gm12166	-0.425259	TATGACAAACCACTTCAACC	-0.43
Gm12165	-1.49886	GAGGCTCCCAATGTTGACAT	-1.5
Gm12164	-1.21991	GAGTTTCAGAACGATCGCGG	-1.22
Dis3l	-1.11769	TTACAAACTGTTCTACGAGG;TCGATGTTGAAGCTAGAACG;CGAGCAAAGAGAGACCGCTG;GATGGAGTCACAGAGATCGT	-2.56;-1.62;-0.72;0.43
Gm16845	-1.11073	ATGCGCTGGATAACGTTGCG	-1.11
Bhmt	0.081215	GCAGTTCACGCCGACAATGG;CGTGGACTTCCTCATTGCAG;ACCTGCCTCAGGATGCTCCA;TCCCTCGGGCCCAATGCACA	-0.4;0.0;0.34;0.38
Aloxe3	0.313573	AAGGGCGTTGAAGATCAGTG;CGTCACCGAGCATTGGTGTG;AAGCAGAAGCTGGATCGCGT;GTGCACGCATTTGCTATGCG	-0.21;0.39;0.44;0.64
2200002J24Rik	0.152314	TGGGACCAAAATCAAGAACC;GCAGGGCTGGAATCGCCAGC;GAGTTGGCTTCCCGGGTCTG;ACAGAGGTAATCCTTCGCTG	-0.31;-0.03;0.46;0.49
Masp1	0.440883	GACAACTCAGGAGAGAACCG;TTAATGTAGTCATAGGGACA;GCGGCAATCTCTTTACCCAG;GGAATATTACTGTCCCGGAG	0.29;0.35;0.39;0.73
Masp2	0.82248	GGCCTGTGATATAGTCCACA;CTGCGAGTATGACTTTGTCA;TGTGGCAATAATGGTCACAA;CCTTTGCCACTGACGAGTCG	0.52;0.7;0.73;1.35
Naaladl1	0.0732796	TGGCTCTACAGAATTTACAG;AGTGGAAGGTTGTTCCATTG;ATCGCTCTGACTCGCTACGG;GGAAATCCTGAGGTGTTGTG	-0.51;0.01;0.25;0.55
Fam124b	0.699903	GGTGAGCATCCCTTCTTGAA;GCAGCACAGAAGACTCCTTG;ACCATGAAAAGTACCACCCG;TTGTGGCACTGATATCCTCA	0.29;0.7;0.86;0.95
Fam124a	0.0714667	CCACGCCAAAACCTTGTCGA;GCGGTCGACACACCAAACAC;CAGGCCGGTGCACTACGGCA;TCTGTGTGGTGGTGACGCCA	-0.56;0.13;0.35;0.36
Daam1	0.253217	GGTCAGCTCAAACATCTGAG;GGATGAAGTAAGTCTCAAGA;GGTGTGTATCCGAGACTCAG;ATTGCAACATCCTTCTGTCG	0.15;0.18;0.31;0.37
Daam2	-0.0282756	CATTGATCGTATCAATGCCA;AAATGTTCTCGGCATATCAG;ATACGCCTGATAGTGTAGCA;CAGCTCTTTAACCTTGCGGG	-1.62;-0.22;0.67;1.05
Zfp52	0.0821903	TTATCACAATCTTTGCACTT;AGACACAAAAGTATGCACAT;AAGAAAAGCCATATCAATGT;GACTCTAAGATTTGAGAACC	-0.68;-0.17;0.46;0.71
Zfp53	-0.307399	GTGTACAGTTAAGCTTGAAG;GAGACATCAGAAAACCCATA;TCTTATATAAAGTGCACAGT;GAGACCCAGAAAGAAATGGC	-0.71;-0.52;-0.13;0.13
Zfp51	-0.982284	CAACGCAAAACAGCACAGAC;ATTCCGATGCTGTAACAACG;ATTTCTAAGATATGCACGCT;AATGCCTGGACTCTGATCAG	-2.76;-0.82;-0.4;0.05
Zfp57	-0.637225	TATAACCTAAATGAGCACGT;CGTGGCAGTGTCTTTCACCC;GCAACCAGGCTAGCAACCAG;TGCACAGGGGTATTCAAAGG	-2.24;-0.62;-0.19;0.5
Zfp54	-0.283085	TGTTATAGTTGTCAATACTG;TACAGCAACCTGGTATATGT;TGGGTTTGATGAGTCAAGAG;CAGTAGTGCCTCAAGCCTCG	-0.86;-0.83;0.14;0.41
LOC115487232	-0.337752	GATGAGGTCAAGTCCACCTG	-0.34
LOC115487231	-0.488192	GTTGATCCCTTTCTTCACAG;AGCACATGGACTCATTATGG	-0.57;-0.41
Zfp59	-0.860564	GAATAAGCCCATGTTCAACA;AAGCACCAGCGCATTCATAG;TGGCCAACAGATTACTAACA;AGGCATCAGAAGTGTCACAG	-1.81;-0.93;-0.76;0.05
Dus1l	-0.311233	GTCTCCAAGCTAGCTCACTC;AGCATCTCTAACGAAGACCT;GTTCTGTGCCAATGACCCAG;GGACATACGATAGTGGACAA	-1.02;-0.45;0.07;0.15
Ntmt1	0.0785141	CCCGAGCATGCCGTCCACCG;ACTGTGGCGCTGGTATTGGA;TGACGTGATCTGGATCCAGT;GGTCGACATGGTCGACGTGA	-0.2;-0.17;0.2;0.49
Nbas	0.0478007	AACAAAACAGCATATTCGTG;TTTGCCGAATGACATGACAT;ATTGATTGATGTCAATTGGT;ATAGCAGTATTTATTCCATG	-0.39;0.07;0.24;0.27
Zyx	0.536721	CCCAGCCGCATACCTTCCGG;CTGAGCATAGGTGAAGCTAG;TCCACCTCCCCCGATGATCG;CTTTAGGTACGCTCTCCTGG	0.1;0.38;0.74;0.92
Plcd4	0.0626967	GATGTGGAGAGGATACGTAA;GCAGCGTTGAAGGATACATA;GAGGCCCAGATTTGGATGCG;GCTGCTGCTTCTGATGAACG	-0.07;-0.04;0.09;0.27
Plcd3	-0.0233688	CTATCCCTCGAGAACCACTG;CCAACAACGAGCGTCTAGAG;CTGACGGACTCTCAGATCGG;GATGTCCAAGCCATGCTGCG	-0.28;-0.11;-0.04;0.33
Plcd1	0.189894	GTAGCGCTCAATGAGAGAGA;AGGTGGATGACAGCTACGCC;ATTTGCCAGAGACATACCCG;GGGAAGAAGACACTAAGTAG	-0.35;0.07;0.23;0.81
Tes3-ps	-1.02559	TAAAAATCCTTAAATCGTCC	-1.03
Gm7094	-1.44292	ACTGATCGCTGAAATCGACA;TGAAAAAGAAGAAATACTGA;AGCGCATAACTTTAGACCAA	-2.04;-1.28;-1.01
Sec13	-1.83806	GATCAGGCCATAGTCATGAG;TTTCCGGTCATAGGAACAGG;GATGCACAGATGGACTACTA;GCCTTATAGACCAACCATCA	-3.0;-1.69;-1.42;-1.24
Krr1	-2.57054	CTTGTTCCCGAAATACCGCG;GCAACGCTGGACTTGATCGA;CCTGACAAACTGCTACGTCA;AAACAGAAGCGTGAGACCCA	-3.05;-2.86;-2.69;-1.68
Gm3962	-2.32896	CCACTTCACTAATCCTCTTG;CCCCAAGAGGATTAGTGAAG;ACATTCCGCACTGCACACAG;TCACTGAAGATGGAACTGAA;GTCATTCCAGATGACGATCA;GCCATCCTCTGTGTGCAGTG;TAAAGCCAGAAATCTCACCA;GATCGTCATCTGGAATGACA;GAAGAAACAGAGTGAAAACA;GGACGATGATAACTCACACG;ATACATAGACATGATTGAAG;GAAACAAAGAGTAATAACGC;GTCCTGGATTCAGAAGATTG;AACTTAAAGATACCTCCCAA;GCTTACAGGAACCCATTGGG	-3.53;-3.42;-3.18;-2.94;-2.66;-2.38;-2.36;-2.1;-2.09;-2.07;-1.99;-1.8;-1.57;-1.5;-1.32
Zfp330	0.0249677	TAAGCCAACACACCTTACAG;AGCAGCTTACCACCATAGCA;AGGAATGCGACAAATGTCAG;GTGTGTGGAATGTGAGCGAG	-0.61;-0.43;0.4;0.74
Zfp334	-0.303446	CCGCCCTGACAGCACACCAG;ACACTCCATAAATATGACCC;CTACAGTAACCTCATCGCGG;GAGGTACGACTTCTTGCCAA	-0.95;-0.44;-0.14;0.31
Zfp335	-2.30641	CGTGGCGAATAACATCCTTG;CATGGCGGCATCTTACGTGG;ACCACAATCATCTACCAGCA;GTACCCCGAGACCTCGACGG	-3.46;-3.16;-1.96;-0.64
Foxe1	0.31524	GCGGCGGGGTAGTAGACCGG;ATCGTGCATGTAGGCCGGGT;CGAACATGTCCTCGGCGTTG;GCCCGGGTAAGCCGGCCTTG	-0.6;0.07;0.64;1.15
Foxe3	0.388303	CGGCGGCGGCCACTACAGCG;CTACTGGACGCTCGATCCCG;CGAACCGGGGCGCGAACCGG;TGGCTGCCAGCGTTAGACGG	0.04;0.43;0.53;0.56
Suz12	-0.650905	AGTCCCTACTGGTAAAAAGC;AGGAGCTGTAGACTTATCGT;CTGTTTAGAGTAACTCGTCC;GCTTCGGGCGGCAAATCCGG	-0.87;-0.71;-0.61;-0.41
Aicda	0.515823	TGAGACCTACCTCTGCTACG;TTCACAGAAGTAGAGGCGCG;GTAGGAACAACAATTCCACG;ACCAGGTGACGCGGTAACAC	0.02;0.36;0.77;0.91
Tmem35b	-0.1037	CCCCCTTACCCATCATGAGT;TATAAGCTACCAGACAGCTG;CACCATCTGTTGTGACACGG;GGTAGCTTATAGGGTCTGGC	-0.75;-0.06;0.1;0.29
Pip4p2	0.10371	GGTTAATTATGCGTCGACTG;GCATTGCCGATCCAGCCAGA;TGGTAAACTTCACCAGCATG;CTGGCGATGGCTGTATACGG	-0.18;-0.11;0.11;0.6
Pip4p1	-0.0861401	GACGCGACAGGTAATCATGG;TCTGCAAAGTGACTTCTCAG;TGTTTACCGGCTCCGTACGG;AGCATTTCCCCCGTTCCCTG	-0.59;-0.41;0.17;0.48
Tmem35a	-0.0946049	ATCACTCACCATTTCACTGT;GAAAACAAAGAAGAGTCCCA;TTTGGGACGACCGGGTACCA;AAGTATTGGTGCTCTTGAAG	-1.05;-0.01;0.34;0.34
Gm4617	-2.96544	CAGCTCCGAGATCACCACCA	-2.97
LOC100041536	-1.48086	TCCCCAAGCAGGGAAATGTG	-1.48
Odf3	0.445518	TTGGGGTTCACACTGTAGCG;GGGAGCCCCACGGAAGCTGT;CAGGCAGCATGTATGCAGCA;GCAATCTTACCCGTGGTGGG	0.07;0.24;0.65;0.82
Odf2	-0.576068	CCTACCGTAACAGTTACACT;CCGACATCAACACCTTAACA;GCTGTTACTACTGCAAGACA;GATTGACAGTCTAATGAACG	-1.03;-0.85;-0.36;-0.07
Odf1	-0.0929697	GGTGCATGTATAAGTCACAC;TGCTGCAGCAGTAACATACT;AGGTCTGCGTGTCGGCCGAG;CATCGCTCCGCAGTTTAGAG	-1.26;-0.25;0.42;0.72
Tinagl1	0.445955	ATCCACGAGCCATTGGACCA;ACTGGGACAACTGCAATCGA;ATGGGCGGATTGTGCCCAGG;GCAGGGCACACTCGTCAGCA	0.13;0.3;0.58;0.78
Odf4	-1.00572	AAGCAACAAACAACTCTCGC;TGATGGAAACGACTCTTAGA;GGCTAAGATAAGTTTCACCC;GGAGCCCTGTGGACATACTG	-2.51;-1.59;-0.67;0.74
Myocd	0.044808	TCTTTCACGGAAGAATCCAT;AGACTCTCGTCCGTGCAGGC;AGCAGTGTGCACAGGAATCG;GGAGAATGTGCATAGTAACC	-0.88;-0.1;0.51;0.65
NO_SITE_124	-0.0871063	GAACCTTCGCGCAACTTAAC;GAACGTAACGGCATGCATCA;GAATTGAGCCGCAACTCGGC;GAACTCGTTAGGCCGTGAAG	-0.66;-0.35;0.11;0.55
NO_SITE_125	0.498944	GACAGTTGACGCGACGGAGA;GACAGTTGGATAACCGTGTC;GACAATCGACACGCCGCTTC;GACAGCCGGTTGACCGGGTC	-0.15;0.46;0.76;0.93
NO_SITE_126	-0.125777	GACCACTATGTACTTATCGC;GACCGACGGTATACCCTACT;GACCATACGCCTCGTATGCC;GACCAACCTTACGGTAACTC	-1.15;-0.24;0.41;0.49
NO_SITE_127	0.526587	GACCTCGCAATTGAGCGCTC;GACCGTCGGGATCCTTAATT;GACCGGTGTGTTTACGCGTG;GACCGGCCAACGGTAGCGGC	-0.33;0.36;0.94;1.14
NO_SITE_120	0.18643	CTTATCCATAATAGGCGGCG;CTTAAGTTCGCGACGGAATG;CTGTCTTCAACGTCTGGCCG;CTGGGGCCGCTGAACCGCCG	-0.23;0.04;0.31;0.62
NO_SITE_121	-0.202339	CTTATCGATTTGGGTTCAAC;CTTCACGCCTTGGACCGATA;CTTGACACCTCGTCCGCATC;CTTGAAAAAGGGGCGACTAT	-1.24;0.02;0.19;0.22
NO_SITE_122	0.192046	CTTTAGTCACGATATACGTC;CTTTGGCGTCGAGAAGCGCA;CTTTATTCCGTTGCATGTCG;CTTTATACCGCGCGTCGGCA	-0.39;0.06;0.39;0.71
NO_SITE_123	0.336452	GAACCAGTATCTAACCCGAC;GAACCGGCGTGCGTTAGCGG;GAACCCGGGAAACACGTCCG;GAACCACGAGCGAGCGTATA	-0.33;0.26;0.63;0.78
NO_SITE_128	0.445439	GACGTCTAATTTCTGGCCGT;GACGTATTGGATTCGCAACC;GACGGTCCCCCCTATGAAAT;GACTAGCACGAACTGCGGTT	0.3;0.34;0.34;0.8
NO_SITE_129	0.504248	GAGATTAAATTAACGCCGGC;GACTCCGGGTACTAAATGTC;GAGACCCATTATGATCCTAG;GACTTCGACGAGAAAACGTT	0.16;0.33;0.72;0.81
Gm20305	-2.07532	CCACATTCTCTGCATCTGAT;CGAAAATGAGATAAAGTCCA	-2.34;-1.81
Trmt10a	-0.824296	AGCTGATGAAACAAAAACAG;AGTCTGACGTCAGATAAACC;CACTAGCCCTCCAATCACGT;CATCGAGTCTACTAATGTGG	-1.62;-1.1;-0.49;-0.09
Trmt10c	-2.16117	CTTACGGTATCTGTATGGGA;TAGGCCATGTCAAAAACCAA;TTATTATGACAAGACAAAGA;TTAGTTCTCTGGTTGAGGCG	-2.85;-2.43;-2.14;-1.22
Trmt10b	0.0927848	GCCAAGCGTGCAGAAGACCC;TGGCAGTTGAGAATCCAGTA;GAGTGTCTGAGGATGAACGA;GGTTGGCGGGACAGATTCGA	-0.28;-0.03;0.3;0.37
Zranb1	-0.224822	TCAGTACTACAAGCTACATG;GTTAGCGATATTGCTTACAG;AGTTCAAATATGTACACATG;GAAGCATACAAGTCATCGGG	-0.75;-0.31;-0.18;0.34
Zranb3	0.0474131	CTTTGGCAAAAGGCGTCAGT;GTGAAAGGCAATGCCCTGAA;GAAGGGACGACTATCAGCAG;GAAGGACCCCGATACTCGTG	-0.63;0.1;0.1;0.62
A730032A03Rik	0.416495	TGTTACAGTGACAATGACTG;ATGCAGCGGACGTAGTCGGG	0.02;0.81
Efr3a	-0.0615661	GTACGTTCTAATCGCTATGG;TGAGTGGATGTTCCAAACAC;ATGATACCTGCTCGAACCCG;TCATAACGTCTATGATAGGA	-0.53;-0.3;0.29;0.29
Crnkl1	-2.21489	AGAGTGCATAGTTAACCCAA;TACCAGAACTGGTTGACGCG;TATGGACGAACACCTCTATG;AGTTCACATTTGCCAAAATG	-3.21;-2.62;-2.36;-0.67
Efr3b	-0.0712482	TGATGGTAGAGAATTTGTGG;CCGTCCGTCCGGTCTCTACG;GCGCTAACTGGGAGCTACGA;ATAGCTTCGATGATAGGAGG	-0.47;-0.16;0.06;0.28
Lad1	0.183678	GGCCATCCTTAGGACCAGAA;AAGAAGGTGGGCTCTTGTCA;TCCCGACTCAGTCTCCGGCG;TGAGAAGTCACTAGTCTCAG	-0.5;0.12;0.13;0.99
Gsdmc4	-0.702138	TGTAACGCTAAGATATCAGG;TGTCCAATCAACAGACCTGG;AGAGGCCTATGAAGTGTCCA;ACTACTGGCTGAGCTCTCAA;GTACGGTGGATACAACATCG	-1.19;-0.86;-0.75;-0.69;-0.01
Gm12957	-3.30537	CCTTCTTGGAGCCCTTCTTC;CTTCTTGCCATCCTTCTTCT;ACCAAGGCCCAGAAGAAGGA;CTTCGAGCGCATCGCGAGCG	-3.72;-3.6;-3.23;-2.67
Gsdmc2	-0.729032	ATTTATAGAACAGAATTGCA;CAACTGGCTGAACTCTCAAA;AGAGGCCTATGAAGTGTCCA;TGTCCAATCAACGGACCTGG;GTACGGTGGATACAACATCG;TAGGCGGAATTTGGTTGCAT	-1.71;-1.35;-0.75;-0.61;-0.01;0.06
Gsdmc3	-0.932568	ATTTATAGAACAGAATTACA;ACTACTGCCTGAACTCTCAA;AGAGGCTTATGAAGTGTCCA;TGTCCAATCAACGGACCTGG;GTACGGTGGATACAACATCG	-1.95;-1.22;-0.87;-0.61;-0.01
Uox	0.311407	AGCATCGGTCCTTCACCTCA;ATTCCAGAGTGAATGACGGG;CACTCGAGCCCACGTCTACG;GAACCCTTCAAACCCAGACT	-0.16;0.43;0.46;0.52
Gm8879	-1.9583	CTTCATTACTCTCAGATGGA;AGAGTAATGAAGGACGAAGG;TGCACCTGACCTAAGTAAGA;TCTGTGCATAAGTTAGAGAT;TATGCACAGAAGACAGGACC;CATTTCTCAGCTGGATGAGG;CTGTGCATAAGTTAGAGATG;ACTGAGATCAACGAAGAACC;CTTACTTAGGTCAGGTGCAG	-3.8;-3.34;-2.4;-1.85;-1.81;-1.64;-1.13;-0.97;-0.69
Mrpl2	-1.4049	GGTCCGCAGACATATGCACT;CTTGCCTACAAGGATCATAG;GGGGGTCGAGACCATACAGG;GAAGCGCTGGATCATTGCCA	-2.33;-1.54;-0.93;-0.83
Mrpl3	-2.58289	GGAGACCAGTTGCTTAACAA;GAAAACCTTTACCAATACTG;TGTGTTAAAATACACTCCCA;CCCACCTTCTCTCTAAGCCG	-3.11;-3.07;-2.11;-2.04
Mrpl1	-0.837895	GACTTTACCAATCCAAAGCA;CAAGGTTGCTGTGTTTACAG;TAAAACGCTTATACCCACGG;GTGTGGTAAAGCAATAACAC	-1.6;-0.66;-0.55;-0.54
Mrpl9	-1.47368	GCGTCACCGCGTGTATAAGT;GAATTGAAGGGAGTACCCCG;CCACCAGAGCACGGTCATCG;GAGAAGCTGTCATCTAGAGG	-1.94;-1.53;-1.46;-0.97
Esp16	-0.0327134	TTTAAACTTACCATTCCTTC;GATCTTATGAGGATGTCACG;ATGTCACGTGGCTCTGTCGT;TTTGCCAAACTATAAGAGAT	-1.41;0.02;0.5;0.76
Esp15	-0.738543	TGATGAGAAAATACATCAGT;TTATCCAAACTATAAGAGAT;AACAATACTTCTTGAAGGAA;ATTCCTTCAAGAAGTATTGT	-1.77;-0.98;-0.38;0.17
Esp18	-0.805562	TATCAAACAATACTTCCTGA;TTTGATACACCAGAATGATG;TTCAGATCAGCAGATATCTC;ATGATGAGGAAAAACATCAG	-2.22;-0.57;-0.25;-0.18
Lrriq3	-0.410039	CATCTTTGGATAATCAACAC;CTTCATCGGATATCACGTGA;CATGGCAGATATCCTAAACT;TCTCCATGGACTTCAGATGA	-1.51;-0.41;-0.02;0.3
Rabac1	0.314236	TTTCTCGCGACCCCGCAATG;CGGGCGACCATCCGGCCCTG;GAGGCACTCACACGCAGTAC;CCAGCGCCTGGTACGCAACG	-0.25;0.36;0.49;0.66
BC055324	-0.320386	AGGTATGGGACTGCTAAACT;TGAGTGGGTCCAGTAGCACA;GGAGCACAGAGGATATGACT;AATAACGCTTTGATAATGGT	-0.67;-0.45;-0.26;0.09
Kcnj1	-0.18411	CATAGGCTACGACATACCAC;TGACAACCGTACTCCTTGTG;AATGCGGTGATCAGCAAACG;CTGTACTTGACCTGAAATGG	-1.08;-0.25;0.18;0.42
Gm8256	-2.85462	AATGCCCCAGGACATCAGTG;ATGTCTCAAAGTTGATCCTG	-2.98;-2.73
Gm8253	-2.99394	GTTGTTCGCGGACACTACAA	-2.99
2610507B11Rik	-0.221406	TATCATTCATTACCGACACC;TTCGGATCAGAGACTATCCA;AAAGAAGCCAAACCCGATTG;TGCGGCGCCTTATTTCTGAG	-0.59;-0.47;-0.35;0.52
Hira	-0.186386	AGTTCATGGATGACAACCAG;AACAGCTGTTGGAATCACAC;TAGCTGCTGACCACTAGGAG;ATGACAAACTGATTATGGTG	-0.69;-0.53;0.15;0.33
Gm3531	-1.86157	TTAGGGGTGAACAACATCTC;TCAGCTGCTTTGTCTCAGCG;CAGTTTCTTATCGTCTGCTG	-2.51;-2.48;-0.6
Gpr75	-0.237312	CCATCCATAAGACTGGACAT;CAAATGGTTCTGTCTGACAA;AACAGCACGAAGGTGAACAT;AGCATCAACTGTGATCACCG	-0.62;-0.47;0.02;0.11
Wwox	0.42838	ATTGCAGCACAAAGCCAAGG;CTTCGTCGGATTATCGTCCA;CTTGGCAGTCTCGAACCCTG;AAGAGGAAACGGGTCGCAGG	-0.06;0.09;0.45;1.23
Fgfr1op	-0.969326	CCTAAACCAGAAAAAACCTA;TTTACTCTTGGACTCTGACA;ATTGAAGCAGAAGGTACTGT;AGAAAAAGGACCGGCCAGTG	-1.9;-1.8;-1.28;1.11
Cptp	-0.176062	AAGCAGTGTCTCACTGACAA;TGGACCACTATATTGCCGGC;CTAGCGTAGTGTTCAGACTG;GCAGTCCATGGTAGCCTACG	-0.63;-0.2;0.06;0.07
Csrnp2	-0.0587999	GCTCTTGCGCAAACTCACAG;ATCATCGAGTGTCAAGCCGT;GATGTCCAGCAGTGATAGTG;AGTTTAACCCGATCCGAGTG	-1.09;-0.23;0.51;0.57
Kcnj5	-0.527215	GGCAAGTGCAATGTACACCA;ATTAACAATCGAGCCCAGAA;CCACGTGATCCAGATCACCT;ACAATGCCGTCATCTCCATG	-1.18;-1.0;-0.14;0.21
Gins2	-3.01208	GGACAAGATCTACCTGATCG;GGACACTGATCAAAGACCTG;AGGTTAATGGCCAGCCACAG;TCCATTCCGGAGGTAACAGG	-3.32;-3.18;-2.91;-2.64
Gins3	-1.58874	GAGCCAAACCCATAGAAATG;CTTCCCAAAATGTACCAAGA;AAAGACAGGAAGTTCTCCTC;AGGGAGCGGATGGTCCGGCT	-2.45;-1.98;-1.05;-0.88
Gins1	-2.08917	TGCTTCGGATTAGAGCACTC;AGTCTCTTGCTACTTACATG;GTTGTTGTTCACAGACGGAG;CCGGCGCGCGGTGTAACTCG	-3.0;-2.7;-2.52;-0.14
Gins4	-1.80309	GACACCGCAAATAGCTGCTG;TGAGATTGTCGAATGCGTCA;AAAGGAGAAAGTGCGCAGTG;GGACTCTGATGGGGGTAGTG	-3.21;-1.7;-1.42;-0.88
Fbf1	0.127969	CACACTCCCAGGAACCTACG;TAGCCAGAGAAGAGCGTGCG;AACATCCTACCAGCAGCGGG;TGGGGCTTACAAGCCTACCG	-0.11;-0.1;0.07;0.64
Gm136	0.0847285	TTTGAAGGTTTCCCCGAAAG;TTTAATGACGGTTACGCCAG;ACTGCTCCAAAAACAAGCCG;GTATGGTCCATCGGATCCAG	-0.34;-0.26;0.15;0.79
Pdzk1	0.108127	TCATTAAGGACATAGAACCC;TGGAGCTGGTCAGAAAGAGT;AGCTCTTGATCATGACGGTG;TTCTTGATCACTACCACCCG	-0.23;-0.2;0.28;0.58
Hdgfl3	0.0735233	ATCCAGGAGTGAAATTTACT;CGAGTACAAAGCGGGAGACC;ATAGGGTACTTGTTTGCTGG;TTTGTTAACTTACGTTTCAT	-0.12;0.02;0.14;0.25
Ccnb1ip1	-0.805501	CGAGAACCACTTAAAACAGA;TAATGTCCAAAACAACCTCT;AGAATTGACCTCTATGAAAG;CTGCGATCAGCACGGCAGCG	-1.85;-1.64;-0.53;0.79
Galk1	0.251153	ACAGTGGGCCAATTATGTCA;AGTTGGTCCATGATGCCACA;GGGCCGCGTCAACCTCATCG;CTGGAAAGCCCACCCCCCAG	-0.31;0.1;0.34;0.87
Gm21178	-0.569784	CAGCTGCAACTTCTTGTCAG	-0.57
Gm21170	-1.06969	CAGAAGCAGATGAAGATATG;TCACATAAAGAGAAAATGGA;TATGTCAAAGAATCTTTCAA;AGCAGAAGCAGATGAAGATA;GCAAAACGAACGAACGAGAG;TTGAAGGTGATACCAAAGGA	-2.25;-2.2;-0.74;-0.73;-0.26;-0.24
Gm21171	-1.09142	CAGAAGCAGATGAAGATATG;TCACATAAAGAGAAAATGGA;CGATGACATAAAAGTTTCAG;AGCAGAAGCAGATGAAGATA;GCAAAACGAACGAACGAGAG;TTGAAGGTGATACCAAAGGA	-2.25;-2.2;-0.87;-0.73;-0.26;-0.24
Rbmx2	-1.78035	CTTCCTTATGAATTGACAGA;GAGCCCGGTAGTTTGACACA;GCGAGAGGTTCAACTTGGAG;GTCGCGCTTCTGGAGCAGGA	-2.91;-2.64;-1.2;-0.37
Adprh	-0.362078	ATTCCCTTCAACAGTCACGA;GTGGGGAAAAGGGCTAATGG;AAGCCATAGATGTGGCACGA;GCTAGTAGGGAATACAGCCG	-1.42;-0.39;-0.09;0.45
Adprm	-0.590815	AATATCTGCTATAACTCCGA;AGTTCCAGTTCACCACACGT;ACAATTATCAAAGAAGCCGG;GAGGGAGCACAACCCAAATG	-1.69;-0.87;0.01;0.19
Cryz	-0.108991	TTTGTGATTAAACACTTCGT;TTCCGCGTAGCCACCAGAGA;AGAGACATACATTCGCTCTG;AGAAGTGCTGAAGCTCCAGT	-0.4;-0.16;-0.08;0.21
Crym	-0.106119	GAGAATGTGGAACCGCACCA;CTCCAAAGGTCCCGACGGAG;GAGACTGCTCACCGCCAGCA;AAGTTAGTCACCTTCTATGA	-0.93;-0.15;0.3;0.36
Kcnj8	-0.761291	CTGCAGAATCAAAACCGTGA;GAGCAATAATATCTTCCTAG;GGCTGCTCTTCGCTATCATG;GACCACCTGGATGCGCACCG	-1.59;-1.33;-0.09;-0.04
Aasdh	-1.09491	TATTACCCTAAAATCCAGGA;ATTATACCAAGTGACCGCGC;TAATATCCAGCACTTCCGGT;TGAACACGGCTTGAACGATG	-1.79;-1.72;-0.86;-0.02
Lrwd1	0.363915	GCTTCGTAAGGTGAATGGCA;CTGTACCAACAACCAGCTCG;CCAGGTGCGGATGATCGCCG;GATGATCCGTTTGTCGTAGG	-0.25;0.28;0.71;0.72
Kdm6b	-0.577516	TTAGCACAAACGGAACTATG;GACAAAAGTACTGTTACCGG;AGTAACAACACTGGTCTTCG;TGTTTGCCAGCCCATCAGGT	-1.38;-0.43;-0.31;-0.19
Fem1b	-0.514972	GTTCTCACGATCATTTGCAA;GATGTACCTACCCGTCGAAG;TGGAGTTGAGTTAGTGACTG;CAAAACGCACTCTATGTCTG	-1.84;-0.51;0.01;0.28
Fem1c	-0.450911	GGGCTCTGTTAACTTTGACG;AAGCGCTGTTAATTAGAGAA;CAAATGGCCATCGAAGCACG;AATCTCGGAGAAAACAAATG	-0.81;-0.59;-0.35;-0.05
Fem1a	0.033087	GGTAGCGCGCGATCTCGCGG;GCGATGGAACTCCGTCACCA;TTACAGATCCTGATGAAATG;GGTGTGCCCGGTGACGCTGG	-0.45;-0.12;-0.04;0.74
Ces3b	0.537216	GAGAACCGAAGAGGTCCCAC;TGATGGAAGACATGAAACCA;AACTACCACATCCCCGTACG;TCCCAAAAGGTAGGGCACAG	-0.13;0.16;0.86;1.25
Ces3a	-0.221368	CCAGTGGTGCTTGAGCAAAG;GTATGTCTTACCAATGACAG;AGGAAAGGACCTTATCACGA;TGATCCATCATGAGATGTGG	-0.56;-0.19;-0.09;-0.04
Cry1	-0.650708	GACATGATAAACAACCAAAG;TTCGCCGGCTCTTCCAACGT;CATCTGTGTTCAGATCCCTT;CCACCATTTAGCCAGACACG	-1.95;-0.38;-0.28;0.01
Cry2	0.272684	TTGCCAACTATGAGAGACCT;ACGCCATCATGACCCAACTG;CCAGGTTTGACCGAATGGAG;GCGTCTACATCCTCGACCCG	-0.15;0.14;0.18;0.92
Rhox3e	-0.766302	GACAGGAACAAGGAAGATGG;TGTAGAGGAAGACAGGAACA;TCTATTACCGGAACTACCTC;TGGTAATCCTGAGGTAGTTC;GATACATAGTAATGTGGAAC;GTGACCAGGCTGAAGCGCCA;GAAGACAGGAACAAGGAAGA;GGATACATAGTAATGTGGAA;GGAAAAAATGAAGAAGATGG;GAAGCTCTGTGGTAATCCTG;AAGGCCTGCAGTGCCAGCAG;ACTAAAATGGACAGCACCCA;CAGAGCGGTGACCGTTGACC;AGAAATCTCTTCCAGGTCAA;GAGGGAAAAAATGAAGAAGA	-2.42;-1.83;-1.28;-1.03;-1.01;-0.86;-0.83;-0.82;-0.79;-0.61;-0.37;0.01;0.02;0.12;0.21
Rhox3f	-0.711077	GACAGGAACAAGGAAGATGG;TGTAGAGGAAGACAGGAACA;TCTATTACCGGAACTACCTC;TGGTAATCCTGAGGTAGTTC;GATACATAGTAATGTGGAAC;GAAGACAGGAACAAGGAAGA;GAAGCTCTGTGGTAATCCTG;TGGAAGAGATTTCTTCCAGC;AAGGCCTGCAGTGCCAGCAG;AGATGGAGGACAGGTCGAGT;ACTAAAATGGACAACACCCA;GCAAGAAATGAGGAAGATGG;CAGAGCGGTGACCGTTGACC;AGAAATCTCTTCCAGGTCAA	-2.42;-1.83;-1.28;-1.03;-1.01;-0.83;-0.61;-0.47;-0.37;-0.19;-0.06;0.01;0.02;0.12
Rhox3g	-0.993227	GACAGGAACAAGGAAGATGG;TGTAGAGGAAGACAGGAACA;GTGACCAGGCTGAAGCGCCA;GAAGACAGGAACAAGGAAGA;GGCTGAAGAGGGAAGAAATG;AAGGCCTGCAGTGCCAGCAG;ACTAAAATGGACAGCACCCA	-2.42;-1.83;-0.86;-0.83;-0.64;-0.37;0.01
Rhox3a	-0.766302	GACAGGAACAAGGAAGATGG;TGTAGAGGAAGACAGGAACA;TCTATTACCGGAACTACCTC;TGGTAATCCTGAGGTAGTTC;GATACATAGTAATGTGGAAC;GTGACCAGGCTGAAGCGCCA;GAAGACAGGAACAAGGAAGA;GGATACATAGTAATGTGGAA;GGAAAAAATGAAGAAGATGG;GAAGCTCTGTGGTAATCCTG;AAGGCCTGCAGTGCCAGCAG;ACTAAAATGGACAGCACCCA;CAGAGCGGTGACCGTTGACC;AGAAATCTCTTCCAGGTCAA;GAGGGAAAAAATGAAGAAGA	-2.42;-1.83;-1.28;-1.03;-1.01;-0.86;-0.83;-0.82;-0.79;-0.61;-0.37;0.01;0.02;0.12;0.21
Rhox3c	-0.699874	GACAGGAACAAGGAAGATGG;TGTAGAGGAAGACAGGAACA;TCTATTACCGGAACTACCTC;TGGTAATCCTGAGGTAGTTC;GATACATAGTAATGTGGAAC;GAAGACAGGAACAAGGAAGA;GGATACATAGTAATGTGGAA;GAAGCTCTGTGGTAATCCTG;AAGGCCTGCAGTGCCAGCAG;ACTAAAATGGACAGCACCCA;GCAAGAAATGAGGAAGATGG;CAGAGCGGTGACCGTTGACC;AGAAATCTCTTCCAGGTCAA;AGAGCTTCAAGATCAGTCTA	-2.42;-1.83;-1.28;-1.03;-1.01;-0.83;-0.82;-0.61;-0.37;0.01;0.01;0.02;0.12;0.24
Rhox3h	-0.489852	TCTATTACCGGAACTACCTC;TGGTAATCCTGAGGTAGTTC;TGTAGAGGAAGATAGGAACA;GATACATAGTAATGTGGAAC;GTGACCAGGCTGAAGCGCCA;GAAGCTCTGTGGTAATCCTG;TGGAAGAGATTTCTTCCAGC;AAGGCCTGCAGTGCCAGCGG;ACTAAAATGGACAGCACCCA;CAGAGCGGTGACCGTTGACC;AGAAATCTCTTCCAGGTCAA;GGCTGAAGAGTCAAGAAATG	-1.28;-1.03;-1.01;-1.01;-0.86;-0.61;-0.47;-0.27;0.01;0.02;0.12;0.5
Nus1	-1.56545	GTGGTCGTAGACGCTAATGT;ACAGCACCTTCACTGCCGAA;CCAGCGCAGCCGAGGATGGG;TCCAGGTGCCGAAGCGAACG	-2.48;-2.31;-0.91;-0.55
Pcgf3	-0.10251	AGGGAATTCTATCACAAACT;TCACTGTGGTTGCGTCAATG;ACCCGATATACTGTAATGGG;AGGAGGACAATGACTACCAC	-0.21;-0.17;-0.04;0.02
Pcgf2	-0.432196	GGACCTGGACGTCACACATG;CAATAAAATAGCCCCCACAG;GTACATCTACCCCTGGCGAA;TGCAGCATACCCCCTGACAG	-1.39;-0.66;-0.23;0.54
Pcgf5	-0.642508	TTATACAGATGATATTTCGA;AGAAATACGTACATGTATGG;CTGCAGGCTGGATAACACGT;TACGAAATAATGGGCAGTCA	-1.46;-0.6;-0.48;-0.03
Pcgf6	0.0397793	CAAATTAGTGATCAATCTAG;TGTAGGGGGTCAGCTCGACA;ATGAAGACACTCTGTAATGG;CCTCGAAGCGGCCTCTCAAG	-0.21;-0.17;-0.04;0.58
Ccndbp1	0.513203	GAAGTGCGTTGTCAGAACAG;CATAACTCACCCCGTACTCG;GAAGAATGTGACCCGTACAG;GCAAGTCCGTATTGCCATCG	0.1;0.11;0.56;1.28
Stimate	-0.24377	GAGAACCAAAGCATGAAAGA;CATGATCTTTGAAAAGTCCG;GAGGGCGCACTGTCCTACCC;GGCATGCTGCTCATTTATGT	-0.97;-0.14;0.01;0.13
Bend6	-0.319683	GGCTCCTCCACTCTTAAGGA;TCAAACTGTGTGACTGCCTG;GCATCCGGAAGGAAAACAGC;AGAGGCAAACGAATCTGGGG	-0.93;-0.24;-0.15;0.03
Bend7	-0.22777	CATGCCAGATTATCACCATG;AAATTAAAAAACAAATTACG;CCTCCACTCTAATTCACGTG;CAGACTAAATCCACAACCTG	-0.42;-0.35;-0.27;0.12
Bend4	0.170808	CGCAGCCGTCCTACCCGGCC;AGGGCCGTACCTGACGACGG;TGCTCGAGCTGTCGCCCGCG;AAGAACACGACTGCACTGTT	-0.03;0.01;0.31;0.39
Bend5	-0.0254723	AGAATGTCTCGAGCCCGAGC;AGCGGCTCACAAGAGTATCG;TCAAAATCCAGTCGCGAGCG;TGGGGAGGTTAAAGACTATG	-0.34;0.04;0.07;0.12
Bend3	-0.1502	GCTCATCCGCAACTACGTAG;GAAGCGGGAATGTGGTGTCG;GAGGAGGCGGCTGATACCCG;GAGTCATAGCAGTCGTCCCG	-1.3;-0.15;0.36;0.48
Sfi1	-0.814453	AGAAACCATGTATATCAACC;GACTCAAGAGCTGTGCAGAG;TCTGGAGCACAGTAGCACGG;GCTCAATTCGAGACTGCCAG	-3.64;-0.12;-0.08;0.59
LOC100862043	-0.297704	GCCTTAATACTTCCGGACTG;CCCACCTATTCCCTTACCTG;CAAACCAATCCCTAGCCCTG	-0.54;-0.51;0.16
Olfr1349	-0.304042	CCTTCCTGCTCACAATGTCA;TGGTGAAGACGAGTGCCACA;GAAGCACTCAGATGTGACAC;AAGAAGTGTCGGATGCCACG	-1.15;-0.77;0.25;0.44
Olfr1348	0.221252	TAGTGGACAATCCCAGCAAG;GCTCTTTGTGACTGAAGATG;ATTGCCAGTCTGTCTTACTG;GCTAAGCCCAAACATACTTG	-0.7;0.23;0.66;0.7
Gdi2	0.330419	GAATTACTTACTAGATGCCA;ACTCACCTTGCAAATCCTTG;GATCAGAACCCATACTATGG;TGGTGTAAAATCCGAAGGAG	-0.61;0.13;0.38;1.42
Olfr1344	-0.115483	CTTCTTCTGTGAGCTACCTG;TGTGGCACGCAGCTGTACGT;CCTTGGACAGACGACTGCAT;ACTCTCTGTACCCAATGCGG	-0.4;-0.15;0.01;0.08
Olfr1347	-0.170933	ACTCAGGAAGACAACAAACA;GGCGGCAAATGGCTACATAG;CCACCTTACTCGTGGGACTG;ATTGCAAGCCTGATCTACTG	-0.6;-0.58;0.21;0.28
Gdi1	0.426815	CCCCGGCCCATTGATTCAGG;GTCTACCGGAAGTTTGACCT;ACTCGCTGTACAACTTGATG;AGGGCAGCTTTGTATATAAG	0.1;0.4;0.5;0.7
Olfr1341	-0.383454	CCATTACCCCACATAGACAT;TACATCAGTCAATGACCATG;GATGGTATAGACAAGAGCAG;GGTGTGAGTCCAAGCAGATG	-1.23;-0.44;-0.38;0.52
Olfr1340	-0.188474	TGGCATAACTCAGATCCAGG;TAACAATGAGTCCATTACCC;TGCAAAGACTGTGTAGACAA;CACTAGGCATCACTGAGACC	-0.72;-0.18;-0.08;0.23
Olfr1342	-0.632261	CCATCTTGATACACACAAGA;AACTCATGTCTACCAAAGAG;TTAACATGGTGTGTCCAAGG;AGGCCAACTTCAGGACAGCG	-2.68;-0.81;0.27;0.7
H2-Ab1	-0.112242	GGTGTGCAGACACAACTACG;CAGATACATCTACAACCGGG;AGCAGACCAGAGTGTTGTGG;TCGTATGCGCTGCGTCCCGT	-0.39;-0.37;0.03;0.28
Plekho2	-0.614258	AACAAGAATCCACTTAAAGG;CTCAACGAAGGGATCAACCG;GCTGCGATCCCCAGGGAACA;GGAGGCATGAGAGCCCGAGG	-1.86;-0.67;-0.02;0.09
Plekho1	-0.0870532	CCTTGGGAAAAACCAGACAA;CTTCGACCTCTACCTCAGAT;GATTTGGAAAAACCGCTATG;TAAAAACCGTATCTTGGATG	-0.63;-0.2;0.16;0.32
Tmem247	0.121893	GTGAGGACAGAGATTGTCCG;TTCAGGCATGCTGTCAACAG;AAGTCCGGCCCAAACGCCAA;TCTCCAGCTCCATCGCGTTG	-0.26;-0.11;0.34;0.51
Ifnb1	-0.252002	AAAGATCAACCTCACCTACA;GTTTCTGAAGACAGTACTAG;GACGAACATTCGGAAATGTC;GCTGCTTATAGTTGATGGAG	-0.79;-0.72;-0.14;0.64
Tmem242	-1.09383	AAACCTTATTGAACCACTCA;CCTCTGAATTAGAAGCTCCA;ACTCTCTGGTAAGGCAGCCG;TCCAGCTAGCATTCCCGCTG	-2.45;-2.0;-0.03;0.1
Bean1	-0.377671	CTTACCACAAAGACTCGTGA;GCTCACCGTATTCTCGGTGT;ACGGTTGTATCGTGCTACTG;CCTTGGACGTCAGCTCCGAG	-2.13;0.09;0.13;0.4
Pa2g4	-1.20209	CAGGACTATATACTCAAGGA;TCAGGCCATATTGTTTAGAG;GTGACCAAGTATAAGATGGG;TGCTGAAGCTGCCTTACGAC	-1.74;-1.23;-1.21;-0.62
Prpf8	-2.40551	TAAACCGGCTCGATAACCCA;AACCGGGAACGGATCCGTCG;TGTACTGTAGTCACCGATCG;CCATACCTGAGGTCAGACTG	-2.99;-2.61;-2.06;-1.97
Prpf3	-1.45895	GGACGAGCAAGGCCGCACTG;TCTTCTACCTCCTCAAAACG;CTTCGTAAGATATACCCCAA;CAACACGACAAATCGAGGAA	-2.73;-1.88;-1.19;-0.04
Prpf4	-2.60409	TGAAGGGCCAAATAGCCTGA;GTTAAGAAATATTCTCTCAG;TGTGGAAACATTGATCTGCC;CAAAACTTACCAACAAGCTG	-3.13;-2.84;-2.56;-1.88
Prpf6	-1.94431	AATTCCATGATCCCAACCCA;GAGTCAGCTTCTCATAACGT;ATCCAGATGTGCCGATCTGT;GAATGATACCAACTACGATG	-2.56;-2.29;-1.66;-1.26
Gm11687	-3.22733	GGTTGCCACTGCCATCCGAG	-3.23
Ninl	-0.232898	CACCTAGAGCAAGAGTACAG;GAAGCTAGAACAAACCTACA;TGGCGTAGAGCCCTCCGATG;GGAGTCGACAAAGCCCCGCT	-1.04;-0.59;0.11;0.59
Gm39715	0.0672988	AACCTGGAGCTCACACAAGT;TAGAATCGATAAGGGCAGTG	-0.61;0.75
Mical1	0.337649	AGAGAGTCTGACCTGATTGG;ATCACCTCCTTAGGTAGACG;CAAAGCTAATGTGGTACCGG;TTCACTATACGAGAGATGCG	0.02;0.38;0.46;0.49
Mical2	-0.0531359	TTCACTATCCATGACCTGCG;AGGCAGGTAGTACCTCAAGC;TCCCACAAGGAGTACAAGCG;GTTGAGGTTTGGGTACCGCG	-0.47;-0.41;-0.19;0.86
Mical3	-0.723717	TTCACCATACACGATCTCCG;AGATGGGCGTAGGAACACCT;GCCTTGGTCCGGGAACAGAA;TGGGCCAAATTGGACAAGCG	-1.58;-0.6;-0.48;-0.23
Rtl8c	-0.0131335	CTTCGACACCGACAAACGCA;ATCTACTAACATGTAGGACA;GCCTGGCCCGAGCTGCGTAA;ACAGCTCAGGAAATGGGATG	-1.35;-0.46;0.55;1.2
Rtl8b	0.33348	GAACGTCACCTTGAGCTCGT;CCTGTCGTCCACCAACATGT;CTTGAGCTCGTCGGTGTCGA;AGGCAAGGTAAAGAGGCCGA;ACAGCTCTGGAAACGGGATG;ACAACAGGCGGCGCCGTCGG;AAGGCCAAGGCAAGGTAAAG;GCAGACCGGCTCCTACATGT	-0.57;0.08;0.29;0.48;0.48;0.5;0.61;0.81
Rtl8a	0.33348	GAACGTCACCTTGAGCTCGT;CCTGTCGTCCACCAACATGT;CTTGAGCTCGTCGGTGTCGA;AGGCAAGGTAAAGAGGCCGA;ACAGCTCTGGAAACGGGATG;ACAACAGGCGGCGCCGTCGG;AAGGCCAAGGCAAGGTAAAG;GCAGACCGGCTCCTACATGT	-0.57;0.08;0.29;0.48;0.48;0.5;0.61;0.81
Gm904	-0.626317	AACTCCACACATAAAGCCAA;GAATGAATGGGACAAACCAC;TGAATAGCATTATTGATCCA;TCTCAGATGCTGGTGACACT	-1.74;-0.66;-0.15;0.05
Fen1	-2.7428	TTGCCATCAAAGACGTACAC;TTACCTTGATGCACCCAGCG;TTAAGTGTCGCATTAGCACG;GAGCTACTTTGGTCGCAAAG	-3.76;-3.53;-3.15;-0.54
Gm906	-1.1397	AAGCAGGTCTCTGAACACTC;GCATATCGATATCAGACCCA;AACTCCACACATAAAGCCAA;CTACCAAGTTTGGTATCACA;CCAAGTTTGGTATCACACGG;AATGGAGCAAACCACAGGTG;TCTCAGATGCTGGTGACACT;AGCATATCGATATCAGACCC	-2.33;-1.92;-1.74;-1.22;-1.17;-1.0;0.05;0.21
Abhd16b	0.276207	TGGCACCAGATCATCAAAGG;GTCTGGTCATATGCTGTGAA;GACTAGTGGACCGCTACCGT;TCATCAAGAACATAGAACCG	0.02;0.23;0.39;0.47
Abhd16a	0.203773	ACCATGTTTGTGGACCGACG;ACCACGAGCCTACCTTCTAG;GCCAGTCGACTTCCACTGGG;GTGATGAACTGTCGGTACTG	-0.23;0.01;0.31;0.73
Frk	0.0627012	AGTAGTAATTGAGAATCCAG;TCCTCCGCCACGTAATTGGA;GTGGAATAATACCACTCCAG;ATAAGAAGGTTGGATGAAGG	-0.66;-0.14;0.27;0.79
Acox3	-0.301995	CAAGACGGCAACTCATGCGG;TCAGCACTAGAATCTTCAGG;GCCTCATGGACAGCCCAGCG;GCGCATACTTCCGTACCTGG	-0.8;-0.76;0.16;0.19
Acox1	-0.0820992	TCTCTTCATAACCAAACTTG;CCTCACAGCACTGTATCGAA;CGATCCAGACTTCCAACATG;AATGTCGGATGGCTTGCGGT	-0.53;-0.26;-0.25;0.71
Pnmal2	0.408611	TGTGAGAGATACCCCCGCAG;GCCATACCTATCCACATTAG;ACAAGTGCCAAGAATTCTCG;GCTTGGGCCTCCAATACCAG	-0.18;0.25;0.71;0.84
Pnmal1	0.232071	GAGGTAAGATTCGCTCCAGG;TGGCGAAGGACGCACTTGGG;GGACATCCACAGATCCCTGT;CGTGAAGGCTGCTCTAGTTG	-0.32;0.16;0.2;0.89
Fry	-0.721466	CCAGAGACCATCACTCCGAG;GCACGACAGCTCATTCCCAA;CCGAATTAAGATGTACCCCG;AGCTTTCAGTCTCAACCCAG	-1.06;-0.93;-0.64;-0.26
Sdhaf1	0.0587983	GCAGCACGTCGGTTCGCGGA;AGGTACCCATGGCCGTGGCG;CGGACCCCGCGGGCGCACGA;GTATCGAGTATCTGTATCGC	-0.58;0.14;0.18;0.49
Sdhaf2	-1.78106	CGTTAATCAGGCGATCATAG;AATGATGTCACACTAGGCAA;CTCTATGAGAGCAGAAAGAG;GCAGATACTCTTTAGCAAAC	-2.82;-1.81;-1.52;-0.97
Sdhaf3	-0.465	AGATTCGCCTATATAAAGCC;CCTGGGTGACCAGTACGTGA;TAAGACTGTTGGTCCTGGCG;AGACGTACGCAGCAGTGCTG	-1.8;-0.31;-0.01;0.26
Sdhaf4	-0.510758	TTTCACGGATGACTTTCGTC;AGTCATCCGTGAAACGGAAA;AGGAAAATGAGTTATCAGGA;AGTGAGTCAAAACGACCGAG	-1.04;-0.91;-0.59;0.49
Gm2244	-2.17941	AGAACAACAGAGAAGGAAGA;TTTGTGGATCAGCATTAAGG;GGAAGAAAAGAGGTTCTGTG;GAAGGAAATCATTCTGGAGA;AATGACATGGAGGAAATGGG;TTCTTTGTGGATCAGCATTA;CTCAACTCAGCGAAAAAGTA;AAGAACTGAAATTGGATATG;CCTGGAACTTTACATATATG	-3.1;-3.0;-2.99;-2.95;-2.73;-1.85;-1.43;-1.04;-0.52
Zscan29	0.291304	GAAGACCTGGACATTCGGTG;AATGGGCAATGAAATGACCT;TTTGGTACGACATTGCTCTG;GATGTCCCAAAAGGCAACAC	0.05;0.1;0.24;0.77
Zscan25	-0.478868	TCGGCAGTTCCGCTACCAAG;ATCCAGGTGTAGAACTCTCG;CAGCCCTTGGCGGAGCATCG;TGACTGCTTTGGAGAATACG	-0.74;-0.64;-0.46;-0.08
Btbd17	0.515619	GCAGCTCAGAGAGCCGATGT;CGAGTAGCATCCTTGCAGCG;CCCCGGTGCTAACAGCGTAG;CTTGGCGTAATGCAACGGCG	-0.09;0.48;0.78;0.9
Btbd16	0.392955	GAACAGTGGCACCCAAAGCG;TTGTTGGTGCAACCAACCGA;ATGACCGTGGACAATGTGCT;AGAAGATCATCATTTCCATG	0.2;0.22;0.24;0.92
Btbd11	-0.151914	CGAAGCGCCCAAATTCACCG;GATGTACGCCTGCGTCCGTG;GGAGTGGGAGAATCCCAACG;ACAGCTACGAGGTAGCCCGG	-1.44;0.11;0.29;0.43
Btbd10	-0.470899	AGAGATCAAGAGATAGACGC;GGATAACACCAGATTTGTTG;GGGCGCTTGCTACCATGAGA;TCCTCCCTTAGCAACACGTG	-0.89;-0.68;-0.54;0.23
Zscan22	-0.0378339	CAGGAAACGGTTCCAACATG;TGCGAGAGCTATGTTGCCAG;AGGTTTACAAGTGTGGGCAA;GTGCCCAAAGAGTGGAAAGG	-0.77;-0.01;0.27;0.36
Lmf2	0.480225	CAGAATGGGAGGTCTTCATG;GCAGGCACTGAGTCTCATAG;AGAAGGCAGTAAGTCGTAGG;CTGGGGCTGGATACTGCCCA	0.08;0.28;0.64;0.92
Lmf1	-0.247013	CCTATGCACCAACCATTATG;CTTCAGAATCATGCTTGGAG;GATCTGCCCTACGTTGACCA;GGTGGCATTCAATCAGAACA	-1.03;-0.62;0.06;0.6
Acoxl	0.121884	TTATCCACACCATTCATACC;GTCCTGAACATGTTACCAAG;ACATCGGCAATGCCATGCAT;ACTGAAAGCCTACAGTACAT	-1.09;0.13;0.53;0.92
1700037C18Rik	0.279912	GGCAGCCTGACACGGCCTGA;ACATCTATGAGGGAGGATTG;GGCTCCGGAGGTGTCGCAGT;ATGCAGCCTGCTGGCCAATG	-0.27;-0.16;0.49;1.06
Tmco1	-0.434229	AGACAAATACAAGAGATTGA;AGTCCTTGGATGTAAGACAG;ACAAAAGCCAATCGCGAACA;TTACTGTTTAGGCATAACCT	-1.02;-0.58;-0.2;0.06
Tmco2	-0.23318	ACTCTACCAACTTTACAAGA;CAGCTGTGCAAATCATCCTT;GCGCCTCAGCCAACAAACTT;CCTTATGGAAACGAAGCATT	-0.75;-0.45;-0.1;0.37
Tmco3	0.100572	CATGCCATCAAGCTGCACCG;GTGTGGAGGATATCCTTACA;TTCCTAGTGGGAAGTGCCCG;GCAGAATATGACGAAGCGGG	-0.97;0.14;0.53;0.7
Tmco4	-0.105106	TAAAGTCTGAGCAAAGATGT;CCATGTTAGCGAGGCCACTG;TGTTTCCAGAACCTGAACAA;GGTGGAGGCACACGCCCCAG	-0.5;-0.41;-0.36;0.85
Tmco5	-0.264257	CTTGAACATGGACCTCGAAA;ACAGGTTAAACTACAACAGT;GAAGGAAAACTATACTGTGA;AAGGTAATCAGGTATGAACA	-1.17;-0.23;0.09;0.26
Tmco6	-0.176846	CACACTGGGGAACCTCATCG;TGCTTAGACACCGAAGCACG;TCCTTCGGCTCGCCCAACGG;TGCTGTACTCCTTACCCATG	-0.47;-0.26;-0.07;0.09
Zmat1	-0.790618	GGTTACCATCTCATTCAAAG;TCCACATGCTCACCAAAGAT;GGAAATGGAGGATAATTACA;GACTCTGCTGGTAAATTGTG	-1.84;-0.96;-0.58;0.22
Zmat3	0.020221	TCAGAGTCACTCATTCTCGT;AGAGGATTTAGCTAAGAGAG;TGGCACAGGCGCACTACCAG;GACCTGGCAGCCACTGACAT	-0.88;-0.05;0.28;0.73
Zmat2	-1.66792	AGTGGAGCGTTCCACGCGCA;GCGGCACAGGGATTACAAGG;ACCCCACAGTCTGAAATGGG;CTTGGACTTTCGCCGAAAGT	-2.08;-1.98;-1.59;-1.02
Zmat5	-1.4587	GTGTGGTACGACATGTTCCG;AGTTGGAGCCAAAGTCGCAC;GAGACCGCCGAGCTTCCTGA;GGTGCTTCTTTCGGTTGTGG	-1.82;-1.61;-1.43;-0.98
Zmat4	0.0900431	CATCAGAGGATTGTTAAACC;ATAGGGAGATGCGACCACGG;GTGGCCGACTCACATTACCA;GGAGCCTTAAGTGAGCTCAG	-0.73;0.08;0.14;0.87
Ankrd45	0.222392	ACTACGGGATCCTGGCGTCA;GGAACTGGATGTTGACATAG;CTGAATGAGGCAACTGCCAG;CTCTTCATACTCTTGCTGTG	-0.06;0.14;0.34;0.47
Ankrd44	0.131556	ACTGGCTTTGAAGAATCAGA;GGACCGACGAGCTCTCCACT;TTGGCAGACCCCCCTCCATG;GTGGAGGCACTTGTTAACCA	-0.69;-0.05;0.59;0.69
Ankrd46	0.0432071	CACTGGCCACAGATTACCAG;GCTCCAAGCTTGCATCGATG;GAAGTAAAGGGATTTAACAG;TTAGTTCTGGCAAAGCGCCG	-0.89;0.07;0.1;0.9
Pom121	-0.301709	CTTGTTAAACCATTGCAGTG;GTCGCGCACGAAGGACGACA;CACACTGCTCTGCTTACCCG;TGAATGGGATATCGTCTTCG	-0.86;-0.19;-0.11;-0.04
Ankrd40	-0.925033	TGCCGGTACAACTAACATCA;TGGGCATGTAAACGCAACCA;TGTTCTAAGTATGGCAGAGG;TCCACCCAATTGCAGAATGG	-1.8;-1.79;-0.12;0.01
Ankrd42	-0.14395	ACCACTGCAAACAATCAATG;CTGTCAGACATAGTGGAGCG;GCTTTAGTTCAATACCCGGG;GCTCACATAGCTGCAATCCG	-1.42;-0.37;0.5;0.71
Ankrd49	-2.13017	GGCCGCTGAAGTGAACACTA;AACATCTATATGCCCACTGT;TTGTAAGTGGAATAATACCA;CAGAGACTCTGAGTACCAGT	-3.5;-2.67;-2.17;-0.19
Cyb561d1	0.119759	AACCCGGATTCGACTCCACT;CCGCCAAGGCCATGAACACA;GGGAGCCGAGACTGACCCGC;TCCAGTGGCCAACAGTGTCA	-0.51;0.15;0.38;0.46
Cyb561d2	0.436895	GCAAAGCACACCTGACCACT;GTGCGCGGACCTTCCGAGAG;TGGTAAAGCCTAACGCCACG;CAGCCAGAGACATAAGAACG	-0.57;0.31;0.72;1.28
Rnf167	-0.0440992	TGGATGCAACGAACTATCTA;AAAGACTGACCCATTGACCG;GGAATGAGGTAATAGCCCAA;CAGTCCCTCGTCGCTCAGAG	-0.69;-0.14;0.11;0.54
Gm46022	-2.19101	ACAGGCACACAGCAGCACAC;ACAGGCTTACAGCAGCACAC;CAGCTAGACTGACAGCAGCA	-2.76;-1.96;-1.86
Rnf165	0.788417	AAGTAATGCTGATAGTGCTG;TTTGGCTCTGTGCGAAACAG;GGCTAGGATTTAGTCCCTGG;GTGCCCTCAGCCAGATACCG	0.5;0.54;0.96;1.15
Rnf169	-0.674366	GCTGTTCTTAGAAACAAAGG;TGACCGCAACACTAACAACG;CAAGAGAACACCAATAATGG;GGAGCGCTCTGGCTTATGCA	-1.36;-1.19;-0.48;0.34
Rnf168	-0.772703	AATCTCTGGACAAGAATCAA;AGCATGGGTTACAGAGCGTG;CCCGGGCCACAGTTATGTGT;GGTGTGCCCCAGTTAACTGG	-2.21;-1.66;0.22;0.56
Eaf1	-2.10847	CTCACTCACAGCGAATCGTG;AGGGATGTGTGGCAGCGTAA;GGAACACTGTCTGCGGCTAG;GGTGAGGGGTTATCCTTCAG	-3.4;-2.57;-1.75;-0.71
Eaf2	-0.563676	ACATCACTGTGAAAAAAACA;GATTATTAACCATGATACTG;CAGTCTGCACTCACAGCGCA;CGCGAGCGGGTTCTCAAGCT	-2.57;-0.52;0.41;0.43
Rad51d	-1.8707	AGAGATCTGCGCCATTTAAG;TGATGCTGGCCTCTATACTG;GATATGCTACAGGACCTTCG;ACAGGCTAGAACCCAAGATG	-2.64;-2.45;-1.26;-1.13
Rad51c	-1.72072	GCACTCGATAACATTCTTGG;GACGGCGGAGGACGTCCTAG;TCTCATAGCAGGAACACACA;AAGATGTGCCGGTACATCTG	-3.43;-1.61;-0.94;-0.91
Rad51b	-0.597311	TTGGATGAAGCATTGCACGG;AGGGTAGTAGACAGGAATGC;ACGAACCGTTTGCATCTGCG;CTAGAACTTATGAAAGTGAC	-0.97;-0.71;-0.55;-0.16
Olfr1101	0.00533521	GATGAGTGACATGTAGACTC;ACAAAACGACAAGCTAGCAG;ACTGATCTCAGTAGTCATTG;ATGTTTCTTGCTGTTAGCTG	-0.11;-0.07;-0.04;0.24
Zfp235	0.305541	CCTACTGCTGCGACAACTGT;GACTGGGTGAGACATGCCAT;GATTAAGGCACCTTTCACTG;TGTCACTCCTCCTGCCATGG	-0.83;0.53;0.64;0.88
Zfp239	-0.0979344	CTTTCCCACATTCGTAACAC;TCTCTCCGGTGTGGACACGT;AGTGCGGGAAGGGTTTCACC;TGAGAAGCCGTATGCGTGCG	-1.5;0.02;0.26;0.83
Fibin	0.308192	AGAGCTATGGCAAGTACCTG;TGAACTCCTCTCGAAGAGTG;CATCAAAGTAGCCTCGACAC;AGAGCAGCTGGCATTTCTCG	-0.22;0.32;0.33;0.81
Olfr15	0.125294	AGATGCTGAAAAATTTATGG;GCAGAGGCGAGGATTCATGA;AGTGAATGTTGACTGAATCA;TGGAGACACAAGTCTCAATG	-0.15;0.09;0.15;0.41
Olfr259	-0.357601	TCATTCTTGTGGGTAATTGG;TAAACCTATTGTGTGAATCA;TATCAGAACACAAGTCTACG;AGACAGGAGTATTACTTCTG	-0.71;-0.37;-0.34;-0.01
Wdr20rt	0.184108	CTACGTCTATATCTACAAGG;AAGGGACCTTAAGTGGACGG;GGAAAAGGCTGTCCGAACCA;CAACCACCTAACGGCCACAG	-0.22;0.12;0.41;0.43
Olfr251	-0.320587	TTTCTAACCCCACAATGCTG;GCTCACAAGCTCGTTGACAT;CATAAACCCTGTATGAGTCA;GCTCAGGTTTCCTACCACAG	-1.53;-0.2;-0.15;0.59
Olfr250	-0.293754	TCTTCTGCTGTTGTACACAC;GTTGACATGACTGCTACCAC;AGGGCCACCAGAGCTCAGGC;ATTAACAGGGAACAAGCCCT	-0.63;-0.39;-0.32;0.16
Armh3	-0.609151	AATGGGGCTTGTGATCACTC;ATTGTCATGCAGGACACGAA;AAGAGTTCCTCCCAAAACCG;GAGGGCGGTGTAGTCCCAAG	-1.06;-0.74;-0.39;-0.25
Armh1	-0.617653	TACCAGAACCAAGTATACAA;TGGTGAGAATCTGATTTCGG;GAGCTCATCTGTGAAAGCTA;CCGCAGCTATATGACCGGCT	-1.78;-0.79;-0.26;0.36
Alg9	-0.154196	ATACAAAACAATGTTGAGAG;TCCCGTCATGGCGATCAGCG;TCAAGTGTCTGCTCTCAGCG;ATGAGCGGATGGCATACACG	-0.8;-0.19;-0.13;0.51
Hal	0.146432	TCTTAGCCAAAGGTTACAGT;ATGCTGTCCGACCTCACCGT;AAAAGATACAGGATTGTCTG;GGACAATGGTGGCTTCACTT	-0.27;0.15;0.22;0.48
Armh4	0.114576	GCAGTCACAGACGTAACACA;AATGAACACTACATCACCTG;AATTTGAGAGCATAAGTCGG;AGGAACGACAGTAGTTCCCA	-0.72;0.01;0.31;0.86
Alg2	-1.8982	CAGAAAGACCATGCGCACGT;GCTCTCGGTGCAATGCGCAG;ACTGGCCAGACGGCGTAAGA;TCTCTATCAACCGATACGAA	-3.28;-3.07;-1.05;-0.19
Alg3	-0.221357	GCCACCAGCAATGTGTAGCG;AAGAAGGAATAGCAATCCCG;GGAAAAGAAACTGACGACCA;ATTGATGAAACCCTCCACCT	-0.45;-0.32;-0.06;-0.05
Alg1	-1.97748	GTGAAGTTGACAGATCTGCG;TGAGAGGGATTGTCAGAGCG;TGTGACCAATGCTATGCGGG;TCTGGAAAGGAGAGTACGTG	-2.64;-2.4;-2.16;-0.71
Alg6	-0.829811	GCTTCATAATCACCAAACAT;TAGTCGATAAGAATAAGACC;TTTGCTCATTTACGTACCCG;TCTCATAGCCTCGTGATGTG	-1.77;-1.53;-0.11;0.08
Alg5	0.173737	CAAAGTCCGGGTGATAACGC;CAGGGTGTATTCAGTTCCCG;GAGGTGATAGTGGTTGACGA;AGCAGTTATAAACGCCACAA	-0.16;0.08;0.35;0.43
1700012P22Rik	-0.049317	TCCCCAGTGCATTTACAGGA;CTGATCAGATAGCGATGCGA;GACCAGACTTCGTTTCTAGG;AACAGGCACAATTATAACCC	-0.34;-0.29;0.0;0.43
Wif1	-0.222924	AGACCACCGTTCATACATCG;GTGTCTCGGCAAACAAGACG;ACATTCTGATTGTCTCGGAG;TGCCATGATGCCTTTATCCA	-0.61;-0.51;0.1;0.13
Gm17511	-1.49886	GAGGCTCCCAATGTTGACAT	-1.5
Hephl1	0.299044	CCCAGAGCAGATATCCTTAG;GTTTCCCCATATGGCCACAA;GTGAAACCTTCACCTACAGG;ACAGCGGCGCTACTTCATAG	0.16;0.18;0.27;0.59
Hif1an	0.198345	TAAGCCAAGGTCCAACAGGG;AATAAACAGCAGGGGAAACG;AGGATACACAAGGTTTGTGT;ACAAGCTATACAGCAGCGCG	-0.52;0.23;0.48;0.6
Rabl6	0.178381	TCATGGAAGATTCAGCATAG;TAAGGAAAGTGTAAAAAACG;TGTTTGACATCACTAAGCAG;CCAGTGAAGATTGTGATCCG	-0.28;-0.05;0.3;0.75
1600002K03Rik	0.0157301	CTTATAACCACACAAACGGG;GCTTGTTCTACGTAATCACT;CGCACCTAAAAGCCCGGATG;AACCAGGGTTGCTACACCAG	-0.52;-0.23;0.08;0.72
Rabl2	-0.388904	GCATGCTTCCTACTACCACA;AAAATCACCTATAAGAACCT;GTGGCCAATAAAATTGATGG;GATCGTCTTGCCGTCTACTG	-0.99;-0.89;-0.07;0.4
Rabl3	-0.243737	CAGTGTGAAAAGCACAAGAG;AAGTGTTAGGAAATCCGTCA;GTTCTCGGTCATAATCCCTG;TTAGTCCCTATTACCAACAG	-1.35;-0.12;-0.05;0.55
Pacrgl	-0.0413239	TCAGCTAACGTAATTAGAAG;TTCAGCACAGGGATCAGTCG;AATAGCTGCGAATGCAGTAG;AACACAGGACTACGGTTCAG	-0.46;-0.41;0.28;0.43
Kdf1	0.15301	GAGGCCATCAGAGTTATGCC;TGATACTCTCTGGCCCGTGG;TGGCCGAGCCTCCTCCCACG;CTTCGGCAGACCCTTCAATG	-0.06;0.01;0.23;0.43
Slc16a14	0.161534	AAGCCCCACCCAGATATCGA;AATAAAGAGAGACTGCACAT;GGCCCTAGGAGTCCTCAACG;AAAGGCTACAAACATGCGGT	-0.72;-0.61;0.43;1.55
Slc16a11	0.152407	GCGGACCCAAATGAACGTAG;GCCAGCCGAAAGTATCAAGG;TTCGTTCAAAGTGCTCCGCG;CTACCGCCAAGACCCGACGG	-1.02;-0.05;0.44;1.23
Slc16a10	0.235627	GCCACGTCGGAGACATCCGA;GAGGTGCTCTTCATGTGCAT;TGAAGCTCTTTAACACGCTG;TGGCATCCAGAACGCCTACG	-0.41;0.29;0.35;0.7
Slc16a13	-0.0058903	CTGACAGCAGCCCAATACTC;CATTCCATACGTCCACCTGG;GATCGCTTCCATAGGGATCG;CAGATGCCACGCGCCCCACG	-0.66;-0.23;0.22;0.64
Slc16a12	-0.465755	CAACAATATCGATTACCCCG;GCTTACCTGTAAGAACTCCC;ACCAGTTATCCTGTCAAGCG;GCCAGGAAAACTGTTCGATG	-1.22;-0.98;-0.18;0.51
Pcna	-3.07614	ATACGTGCAAATTCACCCGA;TGCTTCGAATACTAGTGCTA;GATATCCTGTGCAAAGAATG;GCGCAGAGTAAGCTGTACCA	-3.82;-3.48;-2.93;-2.07
Hipk3	-0.80966	ACACAGCAATCATTACAACT;ATACCATTTACTAAACCTCG;AGCTGGGGGACAGATAATCA;GCTTCATATTAACGAATGGG	-1.44;-0.92;-0.65;-0.23
Pcnp	-0.444924	TCCGCCATCTCCATTAGACT;CCATAGGTAGTCAGACGGCA;GGGGTTGTGTTCACCTCCGG;ACTGTTTCTTCCAGTAATGG	-1.06;-0.77;0.02;0.03
Hipk1	0.0426793	GTAAAGGGCACCGCATACTG;GACTCATCGTCACAAATTGG;TTGCAGGTAGGTTGAACACA;CTGCAGAACAGAACCGTGGT	-0.53;0.21;0.24;0.26
Pcnt	-0.642735	GCTTCAACGACAATTCCTGG;AGACCACATATCGCCAAGGG;ATCCCGAATAGTCTGAACGT;GCAGTGCGTCCAGTTAGACG	-1.22;-0.83;-0.61;0.09
Hipk4	0.284024	CTCGGCCAGCATATTCAGTG;CAGATTGAGACAGTGAATGG;CTCAAGGAAGCGGATAACGT;GGACACGAAGGGGTGACGCA	-0.07;0.21;0.33;0.66
Pcnx	0.161221	CATGACCATGCATCTGCCGT;ATGAGTCTAACTCAGTAACA;TGAGCGCTTACAGTCCGACC;TTTACAAACTCTGGAGTCGG	-0.3;-0.05;0.49;0.5
Clcn1	0.088017	AGGAGTGCTATTTAGCATCG;AGGGTACTGATAGCTTCACG;ACAGGGTATGGGCATAGTGG;AGCTGACTAGAGCCATCAGG	-0.15;0.02;0.18;0.31
B9d1	-0.338796	TTTGGGAATGATGTCGTCCG;CGGGCAGGTAGAGAGCGCAC;GTAGACTCTGGCACAAACAT;TAGACACTGAGTACAATCTG	-0.87;-0.57;-0.09;0.17
Fcsk	0.104233	GCCCTGCCACAGTCATCGAA;AGCTGCCCGCCATTACGAGG;CGGCCCGGATCAGTGGACGT;AGATACCCACCCATTGTGAG	-0.59;0.12;0.43;0.46
Gm41347	0.298249	TGGAGAGTATGCTCCCCCGT	0.3
Guk1	-2.39407	ACTACAAGGAACCCACGACC;GAACCTGTACGGGACAAGGT;CGACATCTAGCACGCAGATG;TGCAGCGTGATATTGCAGCA	-3.58;-2.89;-2.29;-0.82
Inmt	0.240611	GGCGACGTCCTGATCGACAT;ACATGCATGTTGCACTATGG;TGACCAAGACACCCCCGCTG;CCAGCTGCTTTCAGCATGCG	-0.75;0.36;0.62;0.73
Gm14094	-3.53682	TCAGCTGGTTAACACCATGG	-3.54
H4c11	-1.76155	GAACACCTTCAGCACACCGC;GGAACACCTTCAGCACACCG;GGAGACCCGCGGTGTGCTGA;TGCGCTTCACTCCCCCGCGC;CTCATCTACGAGGAGACCCG;TGTTGTCGCGCAGCACTTTG;CCGCCATCCGCCGCCTGGCC;GGCGGGAAAGGGCTCGGTAA;ATGTCTGGCAGAGGTAAGGG;GTCATGTCTGGCAGAGGTAA;AGTGCAGTCATGTCTGGCAG	-3.87;-3.68;-3.67;-3.61;-2.6;-1.67;-0.83;-0.62;-0.43;0.22;1.37
H4c12	-2.18327	TTAGCCTCCGAATCCGTAGA;GAACACCTTCAGCACACCGC;AGTGCTGCGCGATAACATCC;GGAACACCTTCAGCACACCG;GGAGACCCGCGGTGTGCTGA;TGCGCTTCACTCCCCCGCGC;GTGCTGCGCGATAACATCCA;TATCGCGCAGCACTTTGCGG;CTCATCTACGAGGAGACCCG;TGTTATCGCGCAGCACTTTG;CTTAGCCTCCGAATCCGTAG;CCGCCATCCGCCGCCTGGCC;GGCGGGAAAGGGCTCGGTAA;ATGTCTGGCAGAGGTAAGGG;GTCATGTCTGGCAGAGGTAA;AGTGCAGTCATGTCTGGCAG	-4.08;-3.87;-3.75;-3.68;-3.67;-3.61;-3.19;-2.84;-2.6;-1.93;-1.44;-0.83;-0.62;-0.43;0.22;1.37
H4c14	-1.28493	GGAACACCTTCAGCACACCA;CTCATCTACGAGGAGACCCG;ATGTCTGGCAGAGGAAAGGG;TGTCACGCAAGACTTTGCGA;GTCTTGCGTGACAACATCCA;GGGTGGAAAGGGTCTAGGCA	-3.7;-2.6;-0.96;-0.74;-0.22;0.51
H2-Q4	-0.102704	TGGTGCTACAGAGAAAAGCA;TGTCGGTTACGTGGACAACA;GATATGAGCCGCGGGCACCG;GACCCTGATCGAGATCCGCG	-0.56;-0.34;0.11;0.38
H2-Q7	-0.940757	GTGGACGGCGGTGGACATGG;TGGTATTGCAGAGAAAGACC;CGTGCGCTTCGACAGCGATG;CTGGTTGTAGTAGCTCTGTG	-2.68;-1.03;-0.52;0.47
H2-Q6	-0.133256	GGATGTATGGCTGTGACGTG;AGACCTGAAAACCTGGACGG;CGGGCCAGGACACAGCAGTG;ACAGAAAGCCAAGGGCCATG	-1.16;0.12;0.21;0.3
H2-Q1	-0.198829	AGTATTGGGAACGGAACACA;TCAGATGGGCGCCTTCAAAG;GAAACACAGGACCTACCTGG;GCTGCGGTATTTCGAGACCT	-0.83;-0.31;-0.21;0.56
Scgb2b31-ps	-0.398568	GGGTACCACTCTCACTTGTC	-0.4
H2-Q2	-0.558968	GTATTGGGAGCGGAACACAC;TGACATCACCTTGAGAACTG;TGGAGGTCGATTGCTTGACG;GAAACTGACTGAGACACGCG	-0.68;-0.63;-0.49;-0.44
Ankar	-0.573213	AACTCTATAAGACTCAATGG;AGTGCAGGATGCTATCGCAA;CAGTACTTCCACGTTCACGG;GAAGGATCCTAGTTTGCTAG	-2.06;-0.63;-0.3;0.69
Traf3ip2	0.0531443	CCAAAGCATTAGGTAAACTT;GTCCTGCAGGTAACACGAGG;GTAGTACTGACAGTTCCATG;CCTGCGAGCTAAAGTCCTGG	-0.38;-0.09;0.3;0.38
Traf3ip1	0.329198	AGAGTCCAGAATACACAAAG;TCGTGCAGGTAGCGGAACGG;TGCTGGCCAAGATAAGCCGG;AGTGAAGAGAGTCTTAGCTG	-0.07;0.17;0.57;0.64
Dph6	-0.919708	AGAGTTTATACGCAATGTGA;CTGTATCGCAGAGCCATCAG;TAGCTATATGTATCAGACAG;GAAATCGAAGGGGTATCAGT	-1.45;-1.13;-0.91;-0.19
Rpia	-1.99682	CGTGGTTCTCCACCGCCGTG;TGACCTGGATCAACACCCAG;ATGATGTACCTGGAAAGATG;ACTGCACGTGGGAACCCGAG	-2.82;-2.75;-2.5;0.07
Dnajc28	0.0678726	GGAGACTTTGACAATCTCAG;GCATAACTGTCAAGGACGTA;GTTCAGGGCGGATCGCGCGA;CTTCGAAGCTTAAGTAATGT	-0.96;-0.12;0.58;0.77
Dnajc27	-0.198825	GACTCCATAGTCAATCCCGA;GGTACTCACTTTCCCCACTT;TAAAACTCATTTCGGACCTG;ATGTTGTCCATGTTCCCGTG	-1.46;-0.02;0.22;0.46
Dnajc25	-0.26498	AAAGTAAAATAGACATAAAG;CCCAAAAGTGGACGTTAGGG;CCAGGATGAAGAAACACGGA;CGGCACGCGCGACTGCTACG	-1.26;-0.52;-0.17;0.89
Dnajc24	-0.59299	AGCAGACACTCAAAAAGGAT;CTTCTGCATACACTCCTCCA;AAGTATGACCTGCAGCGGCA;GGTCTGACATATTTGCAGAT	-1.93;-0.31;-0.14;0.0
Dnajc22	-0.610689	AGCTGCCACCATTAACTACG;TCGACGATACAAAGCCTCAG;GGGGCGGCCATAGAACACAG;ATGGACAACTTCTATATAGT	-1.76;-0.31;-0.21;-0.17
Dnajc21	-0.997296	TGGATCAGATGAAAACGAAG;TAGGTACGATAACCACCGAG;TAAACGAGATAAGAGAGTGC;CTCCCAGAGCGACTATGACA	-2.21;-0.84;-0.57;-0.36
Mtmr9	-0.158967	TGGGCACAATGACAGTTGGT;TTCCAGGTGATTATGCGAAG;TGACACCAGATCCCTAAATG;AAACCCACAACATGGACCGG	-1.08;-0.25;0.27;0.43
Mtmr7	0.000242309	GCTGCCAATAATTATCAGGG;AAGTGACTTCATTTATGTCG;TCAGAGAGATGTACACGTCG;GCCACGGCACACATCATCGT	-0.34;-0.2;0.09;0.44
Mtmr6	-0.521297	GGAGAGAGTTATAAATATCG;AATCCAACAACAGTGAGCCG;ACCTTGCTGCGGAGTATGAG;GCTAGCCGGCCGGTGATCGT	-1.59;-0.66;-0.27;0.44
Gm11605	-2.58699	TGTGTGAACTCTGACAATAG	-2.59
Mtmr4	-0.0196832	TCCATATTACAGGACTCTGG;GCACATCCGATGTCGACAGG;ACACTGTCAATCATCCGGAG;AGGGCCCGGACATGACACAC	-0.56;-0.55;0.29;0.74
Mtmr3	-0.0114343	CAAACATACATTCTATCCGG;TCGGGACTTTCCCAACGCAG;CATAAGTTTGCTGACCGGTG;TAGAAGAGCCTACCCACAGG	-0.58;-0.19;0.34;0.39
Mtmr2	-0.138673	GTAATGATTCTCTCATAACA;GCCTTCTGTACTCTAGAAGG;TGCTCGGCCAAGTGTCAATG;GTGGCATCCTTTAGGTCACG	-1.37;-0.04;0.2;0.66
Mtmr1	0.31678	AGCCATGGGGATAATTCTTG;AGGGCTTGCCAAATGAGAGT;CAGCGTTGCTGATACCAACA;GTCACATTGGCTATCCAATG	-0.12;0.08;0.56;0.75
Cars	-1.85912	GCCTCAATGGACATTCATGG;CACGGGTTAGGACATCAGGA;GAGAGCGTTTCTCACTAAGG;TCTCCTTCGATATCCTGAGG	-3.21;-2.48;-1.02;-0.73
Abcb11	0.058782	TACGCACCATGCCTTCGCAG;AAGGTTGTGGGTAATCACTG;ATGAAGGCGAGTACACACCA;CCACTGTTCGAATAGATGAG	-0.19;-0.1;0.19;0.34
Abcb10	-0.312683	GCTATGGCGATAGCTTGACT;ACCTTGGGAACGACTCGCAG;CAACCCAGAAAGCGTACATG;CATCATGCCAACACCAACGG	-1.27;-0.42;0.06;0.38
Carf	-0.119478	AGAGACACTGACTGACACAC;AAATCAGTGAGCAAGAAAGT;TCTTATGCGCTACTTGCGGG;AAAATTGGAGATTCCTACCG	-0.86;-0.38;0.04;0.72
Plppr4	-0.817703	CAAAGAAAACTCCTACATCG;TTGGAGCCTAACATCAACGC;GGACCGGGCAGAATCCATAG;GCCGTACATTGAGCCAACCC	-2.1;-0.82;-0.3;-0.06
Plppr1	-0.31914	GTATTTCATAAAGTCAACAA;AAGTGATAGAAAAAGCTCGG;TGATGATCCTTCGGAGTAAG;ACTTAATGAAGCCTTACCCG	-1.61;-0.5;0.35;0.48
Plppr3	-0.353026	GTCGAACCCTTACATCACAC;TGGCTAGATGTACTTCAACG;GTGGAGGGCAGCATCAACGC;GGGGCACGTGGATAGTCATG	-1.71;-0.42;-0.19;0.9
Gm13604	-3.50543	ATGCCCCATAAGTGCTACCA;GGGCATCATTGTCAACAAGC	-3.74;-3.27
Otop1	0.180748	GTTCACGAACCTCCTACTGT;CCGCCCCAAGGACACGCACG;CAATAGGGTATGCACTGCAT;GTATGGACTGAACGTGTTCG	-0.03;0.05;0.33;0.38
Abcb1b	-0.911861	CAGATGACAATCCAATAAGA;TCATCTCTTGAAAAAACCTG;TGATGCTTCTAGTGTTAAAG;AGCCTTTGCAAACGCACGAG	-1.86;-0.98;-0.81;-0.0
Otop3	0.184869	ACATGGAGACTAAGCATGCG;CTCTTCCAAATCGAAGCGAG;CTCCATGCACCGTGAGATTG;CCTGTACCGTGATCCCCACG	0.07;0.12;0.25;0.31
Car9	0.321951	TTGCAGTTGCATCTACACTG;GATCTCAATCTTGGAGCCTA;GCACAGTCAAGGTTCCCACG;CAGTACTGAGGTGCACCACG	-0.12;0.29;0.46;0.65
Scarf2	0.276064	TCACGAGGAATCATGCGACC;CAGTAATGGCACTTACGGTG;CACACGTGCCGTCCACCGGG;CGGCCTTCGACTACCGTGCA	-0.34;0.36;0.37;0.71
Scarf1	-0.0700584	AGTTTCTCATCACGATCCAG;TGGCACTTACGACTGCACTC;TGAGGGCGTTCTTACCATGA;ATCCAGGTTTACACCGACAG	-0.47;-0.43;0.11;0.5
Car2	-0.461223	CAAACTCAACGTTAAAGGAG;AGGACCAGAGAACTGGCACA;TTATCATAAGATATGAGCAG;TCACTGGAACACCAAATATG	-0.94;-0.35;-0.29;-0.27
Car3	-0.0246403	CCTGGACAAAATTAAGACGA;AAAGTATAACACCTTTGGAG;GGGTCATAAGATGCTGACCA;GAAGATGGAATTGGCGAAGT	-0.76;-0.4;0.15;0.9
Car1	-0.608227	TCTAAACTCAGTTAAAACTA;TGGGGCAACTCAAACGACCA;GCCAAAGAAATTGTTAACGT;TGGAACTAGATATTCTGGAG	-1.99;-0.49;-0.05;0.1
Car6	-0.771612	CCAGCCTACCTTAAACAAGA;GAGTTCACTATGACTAACAA;TGGGATCAGGAGTATAATGG;GATGAACTCAGTGCCGTCAG	-2.73;-1.47;0.44;0.67
Car7	0.420858	TGGCTGGATATGATATTGAT;ACAGCTTGTGCCAATTTGAA;CTTAAATCGAACCATGTAGA;GACGATAGGGCCCTTCCAGG	-0.45;0.37;0.44;1.32
Car4	0.189774	CTGTACAGCCTCGTACCGGG;GAAGTTGACATCTAGCAAGG;TCACGGGGTTTGGAGATACT;GAGGATACCTTCAGTAGAGG	-0.66;-0.03;0.65;0.8
Pgk2	0.480189	GGAAGGCTTCTACTTTAGCA;GGATGATAGACCCATTATCT;CGGGCTCACAGTTCTACGGT;GGATACCATCAGGCCGACCG	-0.15;0.34;0.67;1.06
Pgk1	-2.71282	GGACTGCACACCGAGCCCAT;CTTCCTCTACATGAAAGCGG;TAAGGTGCTCAACAACATGG;TCAAGAACAGAACATCCCTG	-3.3;-2.58;-2.5;-2.47
8030462N17Rik	0.242948	ATCTGAACAAGAGACAGCCA;CCGAGACTTTCGTCCAACAG;AGGAGTCACTCTCATAAACT;TGACCCAGAAGTGATAAATG	0.02;0.11;0.39;0.45
Ppip5k1	0.263	GGATGATCGCGATGACACAA;CGTGACTTTCGACAAAAGAG;AGAGCCGAGTTCGAACATGG;GGTGTACCGGATCCTACAGG	-0.45;0.07;0.55;0.88
H2afj	-2.21938	GGCGGTGCTGGAGTACCTGA;CGCGGCCCACGGGGAACTGC;GGCAACTACGCGGAGCGCGT;CCGCGTTGCCCGCCAGCTCC;GCTGCGGAAGGGCAACTACG;GCCGGTGAACGCGGCCCACG;TGGCCAGCTGCAGGTGACGA	-3.67;-3.52;-3.37;-2.99;-1.68;-0.63;0.34
Zfp646	0.0370229	CATTACACTTATAGGGACGA;GGAACATCAGCAGTCCCATG;ACATCATAGCGTGACCCACA;GGCAAGACCTATCGCCACGG	-0.47;-0.05;0.28;0.4
Kars	-2.55902	TGTATGTGATGATCTTAGAG;TGTGGCTATTGACTACCTTG;CTCATCTTCTATGACCTGCG;GGAGCGTTGTGAAAGGAGCA	-3.61;-2.42;-2.31;-1.89
Dpy19l2	-0.326946	ATGTATCCCACAACATACAT;TATGATTGTGCGATACCAGT;TCATATACAGTACATACCTG;GTGCTCGCAACTACGCGGCG	-1.47;-0.63;0.37;0.41
Dpy19l3	-0.121374	AAATGTTCATCCGTTGAAGG;CAAATCGTTCTCATGCAGGG;TCGAGTTTACCATCCCGCTG;TGGGTTTGGAGCAACAAGGT	-0.49;-0.42;0.06;0.37
Dpy19l4	0.0718901	AAGATTCAAGGTCACCGGCA;CATCATGAAAGTGTACGTCG;GTTACAAGTTGGCTTATGAG;AAGGCGCCGTCATTCGAGAG	-0.41;-0.33;0.49;0.54
Ccdc47	-0.291594	AACTCTCCCAACTGTTCTGG;ACAAGACTTACTTAATGTCC;GACACATACGTGTTTGCTGT;GATCAGCACTGAAGATGACG	-0.83;-0.69;0.01;0.34
Krtap6-5	-0.867209	GGCTACTACGGAAACTACTA;GGAGGCCTGGGCTATGGCTA;TACTATGGCTGTGGCTACCG;GGCTATGGAGGCTTGGGCTG;TATGGCTGCTGTGGCTGTGG;GGAAACTACTATGGCGGCAG;TGTGGCTATGGCTCCTACTA;TATGGCTCCTACTATGGCTG;TACTACGGAAACTACTATGG;GGCTGTGGAGGCCTGGGCTA;CATAGCCACAGCCCAGTCCA;GGCTGTGGCTACCGTGGACT;GGCTATGGCTGCTGTGGCTG	-2.75;-2.2;-1.24;-1.1;-1.09;-0.86;-0.86;-0.69;-0.62;-0.22;0.08;0.09;0.17
Ccdc43	-0.35852	TGCCTGCTTCTCAATCAAGG;TGCCGACGTGACAGACGAAG;TGTAAGCGGCGTAAACGGCT;CCCCGCCATCGCCTTCACCG	-1.65;-0.37;0.07;0.51
Ccdc42	-0.0654645	AGCCCTAAAAAAAGCCAACA;TGTAGCGGGCAATCACCTCG;GGAAACGCTGAACTTGCGCT;CTCCAGGAGCTGGATAGATG	-0.55;-0.07;0.08;0.27
Krtap6-1	-0.715244	GGCTACTACGGAAACTACTA;GGAGGCCTGGGCTATGGCTA;TACTATGGCTGTGGCTACCG;GGAAACTACTATGGCGGCAG;AGGAGCCATAACCACAGCCC;TATGGCTCCTACTATGGCTG;TACTACGGAAACTACTATGG;GGCTATGGCTGCTGTGGCTA;TATGGCTGCTGTGGCTATGG;AGAACCATGTGTGGCTACTA;TGTGGTTATGGCTCCTACTA;GGAGGCCTGGGCTGTGGTTA;CATAGCCACAGCCCAGTCCA;GGCTGTGGCTACCGTGGACT	-2.75;-2.2;-1.24;-0.86;-0.78;-0.69;-0.62;-0.46;-0.3;-0.2;-0.18;0.08;0.08;0.09
Ccdc40	0.00279338	AGAAGTTGAATCCATCGGAG;GACCTGCCAGACCGCCAATG;GGGCATGAAGCACCGTAACG;CAGAAAGGTCAGACCCCAAG	-0.5;0.08;0.1;0.34
Actl6a	-2.93771	CCTTCTCTAGTGGAACACCA;ACTGCGATTCCAGTCCACGA;AGCCGTGGGGAAATCAACCT;GAAAACGTACTGTTCGTCGT	-4.12;-3.47;-3.0;-1.17
Actl6b	-0.50141	CTTCTCACAGTGGAACACTC;GCACTCCCAGTCCTCAACTA;GTTACACATGTAGTTATGCC;AACTCACTGTTCATCGTAAG	-1.24;-0.47;-0.29;-0.01
Mbp	0.426888	CAGGTACTTGGATCGCTGTG;AGAAGCGCCCGATGGAGTCA;ACCACCTCCATCCCAAGGGA;GACAGGGGTGCGCCCAAGCG	-0.0;0.2;0.49;1.03
Gm4791	0.26543	CTTCATCTACTTACACAGCC;CTAATGAGGGACGAAGCCTG;TCGTCCCTCATTAGGCTCCA;GGATATGTAGACTGCTGACA	-0.75;0.43;0.44;0.94
Mylip	0.0597496	ACTTGACCCTCAGTTTAAGG;CAGGCGTCTAGGGATCATCG;CTTCAGGTCCGACCCCAATG;GCGACTGTACTGCATCATGA	-0.17;-0.02;0.14;0.3
Xpnpep1	0.389611	CTCTAGGCCTACGATCGCAT;TGGCGTTACGGAGATCTCTG;GTCCCCGAGGGAGAAAGTGT;GGGATGATATAGGCCTGGAT	-0.07;0.37;0.5;0.75
Xpnpep2	-0.412412	CTGCCGTCAATACAACAATG;ACCTTGTTGACGTGGCATGG;AATACATTGATGAGTTACGA;CACTTCATAGACCCCATAGG	-0.76;-0.42;-0.33;-0.14
Tmem259	-0.499191	GCAGAACGAAGAATTCAAAG;GGAACTCATCCAGCAATAGG;GTGCGAGTATCGCAACAGCA;CGGTCAGCAAGGGCGCTGCG	-1.49;-0.9;-0.19;0.58
Tmem258	-1.5821	AGCAGTCCTACCTAGTTACG;AGGAGCTCGAAGCCATGAGT;AGAAGTACCACAGTCAGGTG;GGCAGTGAAGAACATGCCGA	-2.02;-1.71;-1.38;-1.22
Tmem256	0.163319	CTCCGGACAAGGCACCTAGG;CCCCTGACCGTGTGCCCCGT;GTTTCCGGATGCCTACGGGA;GCAAGAGGGTACCCCTAACA	-0.14;-0.13;0.24;0.69
Tmem253	-1.01287	TGGGCAAGACACAAGCAAAG;CCTACGACCTGCAGTCGACA;CCTGATCTTGGGCTTCGTTG;AGGAAACTGAGATAGTAAAG	-2.24;-1.21;-0.48;-0.12
Tmem252	0.177474	GGCCACAACCAGATTCCTCT;AGAAGGATCACAAACCCCAT;CGAGGTGCTGTCTGAGCACG;AGGCTCTCTTCATAAGCTGG	-0.54;-0.24;0.62;0.87
Tmem251	-0.418827	ATAATTGTCCACAACCAAAA;AAATCAATGAGACTTACAAC;ATGAACTTCCGTCAGCGGAT;TTTCAAGGAGTGTGTCCATG	-2.2;-0.79;0.32;0.99
Gm5773	-0.397105	AGATGACCTAGGCAAGCTGT	-0.4
Gm5771	-0.845728	CGATCTTATCATCATCCACA;GGAGCTGGGCAGAGCCACAG;TGAGGGAACCTCCACAGAAG;GCACAACATCAAAGTCCTGG;TGTGCTCCCCCAATCTCACT;CAACATGATGTCGTTATTGA;TATTCAAGTTGCTTTCCCTG;CTGAGTGCCAGCTGGCGCAC	-1.73;-1.51;-1.11;-0.85;-0.84;-0.5;-0.38;0.17
Mterf1a	-0.68627	GAGTCAATCCAACAGAGCAA;CATGTCGATATCAACGCCCA;TTGATATCGACATGGCAAGG;CATTGGTCAACAGTCTGCAG;AAGTTATTCCTTCTGTCCAA;GGAATGCGACAGTAAGGACA	-1.42;-1.01;-0.86;-0.63;-0.23;0.03
Mterf1b	-0.726837	AAGATATTCCTTCTGTCCAA;GAGTCAATCCAACAGAGCAA;CATGTCGATATCAACGCCCA;TTGATATCGACATGGCAAGG;CATTGGTCAACAGTCTGCAG;GGAATGCGACAGTAAGGACA;TCCTGAATGAAATCGACTTG	-1.47;-1.42;-1.01;-0.86;-0.63;0.03;0.27
Gm4425	-3.69683	CAGTCATACCTATAACAGTG;TGTGCATGTGAACTTCACTG;TTGTAGAGACTCTTCTGAGA	-3.8;-3.75;-3.55
Adh6a	0.161131	TGGTGCATCTAGAATCATCG;GGAGTTTGCTCCATGAAACC;TCCTCGGCAGGAAAACCGGG;TGGCTTCCCTACTGGCTACG	-0.97;0.03;0.41;1.17
Mars2	-2.78603	ACTCGCAGACCATCTACGTG;TCGATCGCACAGCTCGATCG;GAGTGGACATAGATGCGATG;TGTCCCGTGTCTCTCGAGAG	-2.95;-2.79;-2.71;-2.69
Vmn1r187	-1.00972	TTCAATATGCTCCATCTCTG;CAAATGTGACCACCAGCATC;ACAATAGCTTACAACCTTGG;CATATGAATATGCAAAGAGA;TACATGCTAATGAATGTCAG;CTGGTATGTACTGAGGACAC;GCTTAGGAATATGATGTCAT;TGATTGTGCCTCGAGCCACC	-2.41;-2.23;-1.23;-0.91;-0.59;-0.39;-0.31;-0.0
Vmn1r186	-1.23882	ACAAGTCATTCTAATCAACT;CAAATGTGACCACCAGCATC;AACAATAGCTCACAACCTTG;TCTGTGTAGGTGAATCACCA;TGATTGTGCCTCGAGCAACC;TACATGCTAATGAATGTCAG;GCTTAGGAATATGATGTCAT	-2.66;-2.23;-1.18;-0.93;-0.77;-0.59;-0.31
Vmn1r185	-0.361206	TTTGAATAGAATGACTATCA;TGAATTTCTCTATGCAGCAT;GCATGTGCAAGACCCACATG;CCCCAAAATGCTATTATGTG	-1.21;-0.21;-0.08;0.05
Vmn1r184	-0.791786	TTATTATCACAAACTACAGT;CATGTGCAAGATCCACATGA;CCCCACATAATAGGACTTTG;TATCATGGAGCCACTAGACC	-2.41;-1.07;0.02;0.3
Vmn1r183	-1.75881	GAGAAGTACCATGGAGACAC;TCCACTTCTGGATTCAGTGT;AGGCGTTGGTCACAGCCATG;TATAGTGAGGAAGAGAGTCA;CTGATGGATACTCAGGACAC;CAAATGTGACCACCAGCATC;GCCCACACTGAATCCAGAAG;TCTGGACTCAGCTTGGCCTC;CAGTGACTTTAATTGGAATG;TGCTCATGAATGTGGCATCA;TTGGCCTCTGGCGTCCTGAT;TGGCCTCTGGCGTCCTGATT;AGAATTCTTTACTCGCCTGG	-3.17;-2.56;-2.35;-2.3;-2.3;-2.23;-1.94;-1.89;-1.5;-1.37;-0.86;-0.54;0.13
Vmn1r181	-1.49219	GAGAAGTACCATGGAGACAC;ATGGATACTCAAGACACAGG;TGCTCATGAATGTGGCATCA;TGTTTAGAACCAGTCAGGAT;TGTAGTGATGAAGAGAGTCA;TCCACTTCTGGATTTAATGT	-3.17;-2.87;-1.37;-1.24;-0.24;-0.07
Vmn1r180	-1.27221	GAGAAGTACCATGGAGACAC;TCCACTTCTGGATTCAGTGT;CCACAGTCCCAACCCCAAAC;CTGATGGATACTCAGGACAC;TCTGGTCTCAGCTTGGCCTC;TGCTCATGAATGTGGCATCA;TTGGCCTCTGGCATCCTGAT;TACATTCCAATTAAGCTCAC;CCCCAAACTGGCAGAGCAAG;TCTTGACTGGTTCTCAACAG;CAGAGCAAGTGTCCCAAATT;GGAATTCTTTATTCGCCTGG	-3.17;-2.56;-2.54;-2.3;-2.27;-1.37;-0.88;-0.88;-0.12;-0.01;0.3;0.5
Dnal4	-0.366603	AAAGATGATCAAGGAGACAA;GCCGATCACCACATGCCAGG;CATGCCAGAGGAGATGCGCG;CTCAGGCTTACCCTGACCAG	-1.32;-0.83;0.34;0.35
Fam178b	-0.377613	CATCTATACTGAGATCCCAG;TGCTCAGGAGGCCATTGTGT;GCTGTGCGGCTTTAGACGAG;CACTGGCGAGATGACCTGCA	-1.25;-0.26;-0.06;0.06
Vmn1r189	-1.23603	TCAGTCCCAGAGCATCTGGG;ACACGTTATTCTCATCCACT;GGCTCAGGCCAAAGTCTGCA;TGGATGAGAATAACGTGTAT	-1.97;-1.73;-0.77;-0.48
Vmn1r188	-0.917313	AATATATCACAGCTTAGGAA;TCTTACAGCCTATATCATCC;AGAAACAGAAATATTCCCCA;GGCTCAGGCCAAAGTCTGCA;TGACTATGATTGGCACCCTG;TCAGTCCCACAGGATCTGGG	-1.62;-1.08;-1.06;-0.77;-0.66;-0.32
C1s1	0.187479	AACGCACAGTTAAACTGTCA;CACAATTCCTCATGTCATCG;GATAATCTCAGGAGACATCG;ACAGACGGATGCCTTACCTA	-0.07;-0.06;0.37;0.51
C1s2	-0.905372	AACACACAGTTAAACTGTCA;TCTTTCAAACTGATCTAATG;TTCTCTTAGATAATCTCAGG;AATTCCTCATGTCATCATGG	-1.36;-0.95;-0.73;-0.58
Znrd1as	-0.436787	GAGAATTTACAGACAAACCC;ACCCAAAATTGTGCTAGAGG;GAGAGAATGAAAAAAGACAC;TTCTGTCTCTCTCTGCGTGG	-0.97;-0.4;-0.4;0.03
Olfr1467	-0.617694	TGCTATTTATACAATCACCG;GTATACAAGAACCAGCTCAC;GGTGAAATGTATCTCCTATG;TGACTACAAGTGTGTGTACG	-2.18;-0.79;-0.02;0.52
Atp5md	-0.620681	GATGGCCAATTCCAGTTCAC;TGTGTCCTGGCCACATATGG;TTACATTCATTCTACCTGTG;ATGGCTGGTGCAGAAAGTGA	-1.58;-0.88;-0.36;0.34
Olfr1461	-0.323232	GAGAGTCCAAGAAAATCAGC;CCACCAGGGACAAGTTACCA;TCACTCCTAAAGTCATAGCT;TATGTATCTGTCTGATCATG	-1.09;-0.42;0.04;0.18
Arfip1	-0.537251	CAAAGAACACACACAAAAGG;TGGCTTTGACAGTACCAAAG;CATTGCTAGTGTGAACACCT;AGGCCGTGGCTCAAGAACTG	-1.25;-0.45;-0.3;-0.14
Arfip2	-0.0702537	TTTGACATCGTCAAGAAATG;TTATCAGAGAGATTTGGCCG;CACACTGGTCACCAAGACCA;GGTGACGGACTCATCCCCAC	-0.4;-0.21;-0.02;0.35
Vmn1r238	-2.20401	ATATTTCCCGAATAACAAGG;TATTTCCCGAATAACAAGGG;TAAGATGACAGTCAAGTAGT;CCATCAGCCCCAATAACTCC;GTATATTTCCCGAATAACAA;CACGAGCCAACTGACTGAGC;GTGCTCTATAATCAGGACTT	-3.84;-3.38;-2.63;-2.43;-1.7;-1.59;0.15
1700016H13Rik	-0.0754634	AATACGATTTCTCCCAAGAA;CTTGGCAAGCCAAACCAAAC;TTGCGGAACTCACAAAGACC;GTGAGTTCCGCAAGGTCCCA	-0.25;-0.22;-0.1;0.26
Vmn1r235	-0.408663	GATTGCACCCAAAATCACTT;AGAGATTATAAGTACTCATG;ATAATTCAACATCCAGTCTG;AGATACACAACATCAGGGAG	-1.99;-0.39;0.28;0.47
Vmn1r234	-0.240379	AAAGCACTATATAATTGTAG;GGTCATCACTATCAGCCCAG;ACTTTCCTACCTTCATAGGG;GCAGCACACGTGATTATCCC	-0.59;-0.53;-0.22;0.38
Vmn1r237	-0.845753	GGCCCAACTCATGTACACAC;TTCTACTGTTCATCATAACA;ATCTGATGCTTTACTACATG;CAAAGGCAGACACAGTATGG	-2.24;-0.71;-0.29;-0.14
Podxl2	-0.0989868	CTTACCTGAGTAGAGTCCCA;GCTATAGTTCTGAACCCCCG;TCCTGCAGAGGCATATGCCA;TGGGACTGAGGTCCCCAGTG	-1.4;-0.23;0.23;1.01
Vmn1r231	-0.593461	CCCAGCATAGGAAAATAGAA;ACTCATCCTTCAATGTTCAG;CAACTCTTTCAGTATACATA;CCATTAAGGCACGAGTCACT	-2.08;-0.29;-0.2;0.2
Vmn1r230	-0.143144	AATGTTATGGACATGTACAA;ATCTTGATCATGCTCTCGAA;AAATAATCAAGTAGTAGGAA;GTTTCTTGGGATGATAGTGA	-0.88;-0.09;0.14;0.26
Vmn1r233	-0.247037	ACCTCTACCTATTCTGCGAA;TTGACACTAATGCTGCATAC;ATCTTAACAGTACTGTTCAA;TCTGAATGTCTGGAGTCGCT	-1.0;-0.55;-0.18;0.75
Vmn1r232	-0.0914741	TCAGCCCCAGGAATTCCCAT;CAAAAGCTCCCATTATCTGG;TGAATGACCTAATGGAGTCC;TCTTGGTAGATGTATACACA	-0.49;-0.12;0.07;0.18
Os9	0.328389	CTTACAGACTCGGAGATCAA;ACAGACCGCCAAGTGTGGAG;TGCCCGCACCCTCGTCACAC;CCAGAGCCAAGCTTCAGACG	-1.42;0.71;0.78;1.23
Gm6485	0.646155	AGGATTTCAAAACCGACTTG	0.65
Gm18375	-0.403847	CAGCTATAGCTACCTTCCAA;CTTTGACTGCAAACAGACAA;GTAGTCCCAGATGATATTCG;GATTCAAGGTATTCTAGCTG	-0.96;-0.53;-0.39;0.27
Dpep1	0.332557	AGTGGCCAGTCTGATCGGCG;TCACCCGTCGATGACCGGTG;GACAACTGGCTTGTGGACAG;ATGTATGCGGACCAGAACTG	0.0;0.05;0.6;0.68
Dpep2	-0.0167321	TTACGTACCATGCCAGACGC;AGGAGTTCCCGCTTATAGAT;CAAGCACCCAATGACCCTTG;AGAAACTTCGAAGCACAGCG	-0.26;-0.17;0.15;0.21
Dpep3	-0.149959	AGTCTATCATCATGCCCAGA;CATACGCACCCATCCACAAG;TGATGGTGACACTATCCATG;AATCTGCGCAATTTCACCCG	-0.59;-0.05;-0.01;0.05
Hells	-0.42091	ACGGTCATTAAAACTTACAG;ACAACTACTTCTCGCTTAGG;TCTGCGGTACCGAATTTCAG;GCTGTATCATGGAACCCGGG	-1.67;-0.31;0.09;0.21
Hyou1	-2.20342	ACATCGTACTCACTTGCCCA;TGGCGTGCTCAGTTTAGACA;TGGAATTGATATCTTTCCGG;ACAGGCGGATAACCCTCATG	-3.15;-2.11;-1.93;-1.62
Ushbp1	0.23898	TGTGGACAAGCCTACACCAG;TGGGTACTGATATCTCAGCA;ACCTCATGGAAGACCAGATG;GCTAGCCCTGTGCAACCGGG	-0.15;-0.13;0.38;0.86
Gm6153	-2.70186	CCCCAAACAAAACGTTCCAG	-2.7
Osm	0.401887	AGTGCCCGGCACAATATCCT;AGAATCAGGCGAACCTCACG;GCCGGAGTGTGTCCTCACTG;TCTGTCTTAAAGCATCCAGT	0.18;0.39;0.48;0.56
LOC100862202	-1.06145	CCCTATTATGAATATAACAG;CAACTCGCTCATAAAGACAA;TCCCTATGTTCCAGAAGACA;GAGCTGAGAGCATTGACTGA;TGTTATATTCATAATAGGGG;CTTGGATATGCTTACCCGGG;CTCGCTCATAAAGACAATGG;ACAGCTGGCACGTTCTCCAG;AGCTGGCACGTTCTCCAGAG	-2.18;-2.08;-1.61;-1.25;-1.04;-0.86;-0.42;-0.17;0.05
Snap25	0.503673	GAAAAGAATTTGACGGACCT;AGAACAACTGGAACGCATTG;GATGCTTACAAAAAAGCCTG;GGCAGCACCTACTTGTTACA	0.07;0.48;0.49;0.98
Snap23	-3.01724	TTACCTCAATGGCTAAACCC;CATCAACTTACCTATTACAA;AATCAAGACCATCACTATGC;AATAAATAAAGACATGAGAG	-4.04;-3.22;-2.68;-2.13
Gm8680	-2.90698	CCACAATGTCAAGGAGCTGG;ACCAAGCACATGCTGCCCAG	-3.0;-2.82
Avpr2	0.324305	CTTGGGGCCCTAATACGACG;CGGCCCGACACAAGGCATCA;AGTTCAGCCCGGACTAACAG;CCTATGCTGGCATACCGCCA	-0.22;0.2;0.58;0.74
Snap29	-0.643324	CATAAATACAAGTAAAGACC;GATGGTAGACAAGATGGATC;ATGTATGAATCGGAGAAGAT;AGCATTAAGAGTGTGTTTGG	-3.18;0.1;0.18;0.33
Sh3bp5l	-0.432836	CATGGCTGACAAAAATCGAC;GGGAGCATCAGCGTGTGACG;CTCCTGCAGGATCCTCCGAT;GACCAAATTGTCCCCTAGAG	-2.05;-0.55;0.31;0.56
P2ry10b	-0.644948	TAATTATTACATATTGCACA;CACCTCAAAATATTAAAGAG;CTGGAAGCGTAGGTATGATG;TATGGCTTCATCCATTGGCA	-1.73;-1.31;0.13;0.33
4430402I18Rik	0.252475	TAGCTGTACTAATTCAAACC;ACATGTCTAACCACAAATGG;GGTTGCGTTGAGTCGGCCGA;CCTGCTTAGGAGCGACAGCT;CTTGGACAGCCACAGGTCGA;AGGACGGGTTCAAGTTCATG;ATCTCACGGACAGAGAGTCC;GACAGCCCGGTGCACCGGCG	-1.06;-0.26;0.2;0.41;0.41;0.43;0.84;1.04
Gm9081	-2.79606	GGCCGGTGCTGAGTATGTCG	-2.8
Dpf2	-0.54907	TGGATGGAAAAGCGACACCG;AGAGGCGGGCGTTATAATTG;GAAGATACGCCAAAGCGTCG;AGTGGTAACTGAGGCCAGGT	-0.95;-0.54;-0.4;-0.31
Dpf3	0.333367	TGTACAACTGGCCCGGAGCG;CGCAGACGTAGGGTTTGTCG;GCGACGATTGCACCCACCAG;ACTGCCGGAGCTACAACTCG	-0.28;0.01;0.75;0.86
Dpf1	-0.250915	CCACCGATCTTGTACTCGCA;CAGCACACAGCAGAGCCTCG;TCTTCTACCTCGAGATCATG;CCAGGACACCGCATCCCTGG	-0.54;-0.4;-0.36;0.29
Phyhd1	0.214193	ACAGACTACTTCTTGAGCAG;GAGCATCACACATTCTCCCA;AGGCCCAACACTCGGCCTAG;TCACCTTCGCCGCCAAAGTG	-0.35;-0.07;0.48;0.79
Prss40	-0.650922	AGTTCTCATCGACAAAAACT;GTGGGAAAAATCCTTTACAC;CGGTGTAGCCTAGCATGACA;GTGGGAGCTGTACTCCACAG	-1.52;-0.92;-0.09;-0.08
Use1	-0.229499	TTGTCGCTGTGAGTCGATGG;GTGGCGTCAGCAGTGCGAAG;CAGCGAGTACTCCCGCAAAG;AGGCCCTGAAAGTTCAAGCA	-0.44;-0.41;-0.3;0.22
Egln3	0.315564	CAAGCAGCTGCACTACAACG;TGCGAGGCGACCAGATCACG;CAGGACCAGCCGGTCGATGA;CCTGGACAACTTCCTAGGCG	-0.75;0.26;0.55;1.2
Egln2	0.530186	AGTCTAGCCGAGCCAGAATG;CCCACCGCGCAGCATTCGTG;ACTATATTGTGCCTTGCATG;CACTACCAGTAGCAGTGGCG	-0.0;0.18;0.21;1.73
Egln1	0.236981	CTCCAGAGCCAGCTTCAACG;GAGCCCGGCTGCGAAACCAT;CCCGGAGACCGGCTAAGCGG;CGGCAGTACTGCGAGCTGTG	-0.55;-0.23;0.78;0.95
Gm45935	0.00689155	ACGGAATCTACGAAACATGG;CATTCTCCATCCGATGACAA;GAGTTGTCACATGATGCAGA;GAGGACTACGCAGTTCTACA;ATGGAAAGATATATGCAGTG;GAAGGAGCCATCGTAAGGTG;GGAGAGCCTCTCGGCCACAG	-2.15;-1.3;0.03;0.29;0.6;1.05;1.52
Wnt10a	-0.0363731	AGCACTCTCTCGAAAACCTG;GGGACGAAGAAGCTTTCCGT;TTTACCCAGAGCGCACGCGT;GAGACTCCACAACAACCGTG	-0.48;-0.33;0.32;0.34
Wnt10b	0.268941	TGTAACCACGACATGGACTT;AGAAGGAGAAAGCACTCTCA;TGGTAACGGAAAACCTGAAG;GCGCCGACGCCGTCACGTCG	-0.76;-0.01;0.52;1.32
Apeh	0.122822	TACAATGTCCACCACCAATG;CATGGAACACTAGGTACTGG;TGCGTGCTGGATATCGAGAG;AATTGACCGAGACCTTATGG	-0.6;0.04;0.37;0.68
Ndc80	-2.18209	TCACACGTGGCCTCACATCG;GTACCAGGAAGTTCATACGA;GAGTACACACAAACCGACAT;GAAGAATTAAAATACGCAAG	-3.13;-2.33;-1.67;-1.6
Cgas	-0.211774	AAATTCAAAAGAATTCCACG;TGATAAGAAGTGTTACAGCA;CAGAATGCAGAAACGGGAGT;GAGGCGCGGAAAGTCGTAAG	-0.52;-0.52;0.06;0.13
Mcf2	-0.123434	GGCTGAAACAGAGCTACCAC;CTCAGCACATAAATGGCGAC;GGTGATTCGATGCCAGCTTG;GCCTAAAAGAAGTACCCGAG	-1.16;-0.75;0.37;1.04
Aplnr	-0.136672	CTACATGGACTACTCTATGG;CATCGCTGGCCATTTCCGAA;CCAGGTATCGGTCAAAGCTG;GCAGGAATGAGCGCTCCAGA	-0.48;-0.45;0.07;0.32
Odf3b	0.257592	ACCATCGCTCCCCGAAACTG;TACAAGCTGCCAACGAACAC;CCTGCTCGCATGACTGTGCG;CTACGGTCGCCTAAGCCACA	-0.05;0.04;0.39;0.65
Gbe1	-0.534046	GGCTATGAACCACATCTAGG;GAACTATGATTGGATACACT;AGACTCGATAACAATAGCAG;AATCCCCCCTGATACCTCAT	-1.38;-1.1;-0.31;0.65
C130074G19Rik	0.382535	AAGGCGGCGAGCAGCTTAGT;CTGTCTCCTCGTCACCGGCG;CCCGGACTGTGAGCGCGAAG;TCCAGGGAGTCGTAGCGCTC	-0.0;0.43;0.45;0.65
Gm10408	-2.11646	AGTGCCAAGGAGCAGCAGGT;AGAACAACAGAGAAGGAAGA;CAGTTCCTTGGAGTACTGCA;TTTGTGGATCAGCATTAAGG;GGAAGAAAAGAGGTTCTGTG;GAAGGAAATCATTCTGGAGA;AATGACATAGAGGAAATGGG;TTCTTTGTGGATCAGCATTA;GCATGGAAACAATTATGGAC;CTCAACTCAGCGAAAAAGTA;CATCTGTGCCTCAAGTGCCA;AAGAACTGAAATTGGATATG;GTACTGCATGGAAACAATTA;CCTGGAACTTTACATATATG	-3.45;-3.1;-3.01;-3.0;-2.99;-2.95;-2.7;-1.85;-1.73;-1.43;-1.3;-1.04;-0.57;-0.52
Gm10409	-2.01778	TGAATTCAGTGTTCATCCTG;CAGTTCCTTGGAGTACTGCA;TTTGTGGATCAGCATTAAGG;TGTGTCACTGACTCACCTGT;TTCTTTGTGGATCAGCATTA;GCATGGAAACAATTATGGAC;TCAAATCCTCATACATGTAA;AAGAACTGAAATTGGATATG;GTACTGCATGGAAACAATTA	-3.29;-3.01;-3.0;-2.33;-1.85;-1.73;-1.35;-1.04;-0.57
Cyp3a44	-0.775284	CACCAGTGGAAGACTCAAGG;TGTGTTAGGTGCTTACAGCA;CCTTCTGATTAGAATCCAGG;GGGTATATGGAAATTTGACA;TCTAGGAATTTGGCCCAGTG;GGCCAAACAATACAAGGTGA	-2.31;-1.08;-0.82;-0.52;0.02;0.06
Krt33b	-0.502875	CCTCCAGATCAGACTTGCAG;GGCCTACTTCAGGACCATTG;TGGAATGTAAGATCCAAGAG;GTGTCTCAAGCAAAACCATG;CATCCCCTGCAGATTCTCTG	-1.27;-0.77;-0.34;-0.11;-0.03
Krt33a	-0.327257	CCTCAAGCAGAATCACGAGC;GGCCTACTTCAGGACCATTG;GGAGGAATGGTACACCACAC;GAGTACTCGGTTCAGGTCCA;ACGAGACAGAGCTTAGTCTG	-1.03;-0.77;-0.33;-0.22;0.71
Gm10406	-2.44054	AGAGACCAGACCAACAGAGA;TGAATTCAGTGTTCATCCTG;AGTGCCAAGGAACAGCAGGT;CTGGCTATAAGTGTCCTGTG;CAGAAGGCTGCTGGTGGAGC;CAGTTCCTTGGAGTACTGCA;TTTGTGGATCAGCATTAAGG;GAAGGAAATCATTCTGGAGA;AGACCAACAGAGAAGGAAGA;TGTGTCACTGACTCACCTGT;CTCAACTCAACGAAAACGTA;GCTGGCTATAAGTGTCCTGT;TTCTTTGTGGATCAGCATTA;AGGCTATTTCAGAAAGAGAA;TCAAATCCTCATACATGTAA;GGCTGGCTATAAGTGTCCTG;AAGAACTGAAATTGGATATG	-3.52;-3.29;-3.28;-3.12;-3.04;-3.01;-3.0;-2.95;-2.83;-2.33;-1.97;-1.89;-1.85;-1.72;-1.35;-1.3;-1.04
Clasrp	-2.34018	TGTAACTACGAGCGGTACAG;GATGTGCACGAACATCAAAG;GTCTCCATCAGCCATGCCGT;CTGACACTTACCGCTTATAG	-3.63;-2.89;-1.85;-0.98
Scly	-0.376203	TTCTAGATTACCTGACACAT;AGCCTGTCTCCGAGATCAGT;TGTTTGGAGGTGGACAAGAG;ACATACCTTATGTCCCACGA	-1.66;-0.0;0.05;0.11
Ska1	-1.44982	ACAAACTAACAGTTCACTCA;GAAGCGCACTCACAAGCTCT;ATTCTGTCGATAAGAAATCT;TAAAGAGTCAGACAAAGCTG	-3.62;-0.99;-0.74;-0.45
Ska3	-2.08835	ATCAGACAGCTCCTTCACAC;AATCCTCCTTGTCACGCGCT;TCCATCCTTAGAGCACACCG;GTGGAGAAGCCATAGGAACT	-2.86;-2.74;-1.92;-0.84
Ska2	-2.24877	GGTCGATAAGCTGGAACTGA;GGATTACCTTCAATATAGGC;AGTAGCACAAATGCAGCTCT;TTACCTCTCCTGCTGAATGT	-2.96;-2.44;-1.9;-1.7
4932411N23Rik	-0.312806	TCAACTTCAGAGGACAAACA;CAATGACTGGATAACAATAG;TGAAGGATACTTGCAACACG;GTGGATGAGAAAGTTACCCA	-1.13;-0.35;0.07;0.16
Gdpgp1	-0.212896	GGCTGACATTGATCACCACA;AGCACACCCCTAGACCCCAA;CAGGTGAAGATGGTTCACAG;CAAACCCCACGGAACCGGGG	-0.83;-0.31;0.13;0.16
Dhx38	-1.69504	GGTGACATCTGACCAGATCG;GAGACTCCGTCCCACCCCGG;CTGATGATAGAAGACACTTG;GCAGCGCAGGCAAATCAACG	-3.03;-1.62;-1.24;-0.89
Gm32465	0.244729	AGAAGACGAGGCTTACGACC	0.24
Dlk1	-0.406858	TATTTACCCATTGATCACGC;CCTAACCCATGCGAGAACGA;CCTCGCAGAATCCATACTGG;CACGTGGGACCCATGAACGG	-1.72;-0.35;0.08;0.36
Gngt2	-0.237532	GCAGGCTCACCAGATCACGT;GGAAATCAAGGATTATGTAG;ATCTTACAGATTTCCAAGAC;ATTATGTAGAGGCCCAAGCA	-0.97;-0.27;-0.23;0.52
Gngt1	-0.692216	CATCGAAGACCTGACAGAAA;AGTGACACTGGAGAGAATGA;GATTATATTGAAGAAAGGTC;AAAGGACAAGTTGAAGATGG	-1.18;-0.95;-0.7;0.06
Dlk2	0.530027	TGAAGTTGAGGGCAAAACCC;GGCCAGTGTGTGTATGACGG;TGGACGTGGCTGTGAGCGCA;ATGTGGACGACTGTCTGATG	-0.11;0.18;0.98;1.08
Gosr2	-2.06063	CCACAACATTCACCACGGCA;CATACTTTAGCTGGTCGACA;CAGGAGATCCAGTCTCACAT;TCAGCACCGGCGCCAAGTCA	-3.25;-2.79;-1.26;-0.94
Dhx32	-0.0645652	TCCATCCATTACCAGCACGG;AAGGCGTATGACAGACTCGA;GGAAGCCAACCTGACTAGCA;AATACGGTAAGCCGTCAAAG	-0.81;-0.38;0.07;0.86
Gosr1	0.0407786	TGGCTTGATCCATTTAATAG;GCTCGTACAGAGTTTACTGA;AGAATCTCATGGGATCAGTA;CACAGCGGCTCACGGGATGG	-0.53;0.02;0.07;0.6
Dhx34	0.333358	CCGACCGAGTGCTTTCAAAG;CGACAATAAGTATCCCCCCG;GGTAGTGAAGCAATGCACGG;AGTCCCGGAAATCCGCAGGG	-0.6;0.41;0.48;1.05
Dhx35	-2.11192	GGCGATAACACTTTCCCGAG;TCAGATTCAGAAAAAGCGAG;GAGACTTCCATCACAATCAG;TCCTGCAGCTAAAAGCCCTA	-2.48;-2.16;-1.92;-1.89
Dhx36	-1.78265	TGTCCAATGATACATATACC;GCCTACCGTCAACCAGACAC;CAGCGTATATAAAGGAACTG;AGGGTCGCGAGATCGGCCTG	-2.64;-2.17;-1.86;-0.46
Dhx37	-2.25446	CCTGCTTCGTAGAGAAACTG;AAGTTGCCTACCTATAGCAG;ACCTGTTACAGGTTGAGTCG;ACCAACCTAGGACCAGCACA	-2.89;-2.86;-2.47;-0.81
Cops8	-1.29876	CTTTCACAATAGATGCAACA;GGAATAATGCAAGATATCTG;CTGACCGTACACTGGCGGTG;CAACCATCAACGCCCACCAG	-2.94;-1.36;-0.61;-0.28
Cops9	-0.461038	GTGGATGAGATGTTCCCCGA;TGTCGAGATGAAACCCGCAG;ATGTGGACCTGGATGAGGTG;CGAGGGCGCGGGGCCCTATG	-1.35;-0.73;0.02;0.22
Cops2	-1.93592	AGCATAGATTTCTAATAACT;GTGGTTTAAGACAAACACAA;TGATGACACCCATGATTAGT;TTTAAACAAGTGGTTCGTCT	-2.9;-2.21;-1.48;-1.15
Cops3	-2.11134	ATGGAGGAATGATCTATACG;GCAGAGATCGGCATGTACTG;TCATGGTAAGCATTGCTGAG;GATGGGACAAGTTCTTCGCA	-2.73;-2.2;-1.95;-1.58
Cops6	-1.99489	TCTGGGTTGGTATACCACAG;AGAATATTATTACACCAAGG;GAGCTCAGCAAACAGCATTG;ACGGATCGGTGTAGACCACG	-3.12;-2.57;-1.54;-0.75
Cops4	-1.57399	AATTCATTGAGGCCGCCCAG;GAGAAATGCAGCCCAAGTGT;GGAGGTCTACCATTTCACCT;CTGACATTCTCATTCACCAC	-2.69;-1.92;-1.16;-0.52
Cops5	-0.648062	GGTTGGTATCATAGCCACCC;CGCCTTTAGGACATATCCAA;TGAAAATGGTGATGCATGCC;GCCATGACACTTGAGACCGG	-1.57;-1.56;0.27;0.27
Dhcr24	-0.379645	ACCTGACCCATAGACACCAA;AGATGCTGCGCGTGTGTCGG;GTCTGCCAGGATCAGCTCGT;GTAAGACCTTCATGTGCACG	-1.42;-0.55;-0.49;0.95
1700024G13Rik	0.187802	AGACGGACATCAGATCATCC;CACCGCACCTACCGACTGCA;GCTGTAGGGCCCATAGCGCA;GGTGGAGCTTGTGGTAAATG	-0.29;0.02;0.28;0.74
Brca1	-0.925801	CATCTTGAGCAATCTATGAG;TGTTATCCAAGGAACATCGG;TTAAGCGCGTGTCTCAAGGG;AAGTACATCCCTTCAACCTG	-1.87;-0.93;-0.7;-0.2
Brca2	-1.06551	TTGGGAGTGACAATACACCC;TGCTTTGGCATATTATACGG;GTACCCAAAGTCTCGTCAAG;ATGTACCCAATATGCGAGAG	-1.4;-1.21;-1.05;-0.6
LOC108168549	-0.178657	CATTTCCTACAAGAAGGATC;TTGGCTGCAGAATTTCTCAC;TGAGGAAAAACTACTTTGTG;GCAGCCAACAATATTCCCCA;CAACCAGTGCGCCTGCGAGG;TAGGAGGAAGCCTTCTTCCC;ATGGCCTTCCAATGGGTGAC;AGAGGTACAACACAAATTTG;CCAGGAGCTGATAGACGTAG;AGTCCTGTAAGAATGGCACC;AGGTGGACATCCCTCACCTG;GCTGCAGAATTTCTCACGGG;AGGCGCACTGGTTGGCAGAG;GAGTGGGATGGTGCTAGCCC;GAAGCCTTCTTCCCAGGCCC;GCTCTGAGGACAACTGGAGT;AGCCTTCTTCCCAGGCCCTG	-1.54;-0.97;-0.6;-0.45;-0.31;-0.23;-0.17;-0.15;-0.09;-0.05;0.01;0.02;0.09;0.32;0.32;0.39;0.39
LOC108168548	-1.03401	CAGAAGCAGATGAAGATATG;TCACATAAAGAGAAAATGGA;TAAAAGGAGATGAAGACATG;CGATGACATAAAAGTTTCAG;TATGTCAAAGAATCTTTCAA;AGCAGAAGCAGATGAAGATA;GCAAAACGAACGAACGAGAG;TTGAAGGTGATACCAAAGGA	-2.25;-2.2;-0.99;-0.87;-0.74;-0.73;-0.26;-0.24
Acap1	-0.0996202	GTCACAGATGCCAACAACGA;CCTAACTCTAGAGGTCTCCG;CCAGGACCCTGTAACCGTGG;CGAAGCTTATGTGCGAGCTG	-0.76;-0.09;0.0;0.45
Acap2	-0.266028	TCAAAGAAACAAACAGCACG;CCAGCAACGCCTTCAAAACG;ATTGCGAAGACATCGAGCGG;TGTATCGCGATGATTGACAC	-0.88;-0.67;-0.01;0.49
Acap3	0.381793	GGAGATGGTCAACTATCACA;AACAGCCAGTGTGGCGACTG;GTTTCACAGAGCATAGGCGA;TTTGATGTGGATGCACCAAG	-0.39;0.42;0.69;0.81
Ep400	-1.6399	AATGGTCATAAGGTTACACA;GCAGAGAAAGTAGCAATCGG;AGAAGACTGTCCTAGTGACA;GGGCGGCCTCGCGACCCACA	-2.7;-2.44;-1.1;-0.31
4933436I01Rik	-0.620304	CTATCAAGACAAGTATGCAA;TGAACGAAACAAAATGCTGC;TTCCTAAAGCCTGTATCTAG;TGTAGGTTTACATAGAGGGG	-3.05;-0.22;0.29;0.5
H2-DMb2	-0.039444	TGGGTCAGCACATCCCAGAA;CGTGCGTGCTGAATGATGCT;TAAGGCTCTCCTGTTCGTTG;CCTCAGTCTGCACTGTATGG	-0.45;-0.24;0.16;0.38
H2-DMb1	0.120358	CGTGCGTGCTGGATGATGCT;TGGGTCAGCGCATTCCAGAA;CCTCAGTCTGGACTGTATGG;ATTTGGGGTGCTGTATCCAT	-0.3;-0.03;0.38;0.43
Rps6kb1	-0.297274	TATTCATGGAAGACACAGCG;CTCTTAGCCTCCATTCACTG;AATGATAGTGAGGAATGCTA;ACTTCGGGTACTTGGTAAAG	-0.69;-0.45;-0.26;0.21
Rps6kb2	0.21071	CAAGGACACAGCCCATACCC;AGTGAGCATGTCGTACATCA;GCAGCCCTTAATTCGCCAAG;AACCCCACTCAGCGAATTGG	-0.33;-0.29;0.7;0.76
Eras	0.172889	AAGCAGCCTCTGGTACTAGT;AGTAGGAATCTTGGATAGTG;GCATTGGTGAGTCATCTGGA;ATCTCCAGAGGAAAGTCACG	-0.37;-0.06;0.22;0.9
Tnrc6c	-0.127844	CATTATGAAAATTCCCACTG;CCATTAGAAGAACTTCGGCT;GGAATGATGCCACGAGATGT;AAGGTGGACATGGACAAACG	-0.81;-0.54;0.24;0.59
Cald1	-0.282431	TTTGATCCGACCATAACAGA;CTGGCTTAGACTCTTCATCG;GGCTGATCGAAAAGCTAGGG;TCGCTCAGGACGGTATGAGG	-1.41;-0.11;0.03;0.36
Samd1	0.577989	CGTCCCGGCCTGTCTCCGCG;GGAAGTCGTGCGCTACCTCG;AATCCACTCTTGGTAGTGCG;GAGCATCTCGTACCGCAACG	0.48;0.54;0.56;0.73
Trmt2b	-0.283034	TCAATTCACAGATCGCTCCA;GTAGTTCGTACCAATAGGCA;GATGGCAATCCAAAGACTGT;TGGCTGCACATCAGTCTGAG	-1.38;-0.19;0.06;0.39
Dkk3	-0.00940899	TAGATAACCAACAACCAGAG;GCTCAATGAGATGTTTCGAG;CTATCACAATGAGACCAGCA;CGGAGTCCAAGTGACCGTCG	-1.13;0.07;0.43;0.59
Cryba2	0.110859	TTCGAGTACCCCGACTTCCA;GGCTCCCCGCTCACAGACGT;AGGACAGCAATTGGTTGCTG;CCTCCTCATCCCAGAGTGTG	-0.38;-0.04;0.38;0.49
Cryba1	-0.350926	TAATGTCCGGTCACTTAAGG;ATGAACACACCAGCTTCTGT;AAGAGGAGAATACCCTCGAT;AGAACTTTATTGGACGCCAG	-0.71;-0.55;-0.36;0.22
Cryba4	0.39174	CAGCTGTGAATTCATGCCGT;CGATCTCTCAAAGTCCTGAG;AGATGGTCAGCCTTGAGTCG;CAGCAATATGTGCTGGAGAG	-0.41;-0.06;0.38;1.65
Tnfsf13	0.118605	TCAACCAAAGAGCAACCGAA;GCTGCAAAGCCTAAGGCGGG;GGCAACCAGTACTTAGGCGT;ATGGGGCGAAATCTCGGAGA;GTGAGCCGGCTGCAGCGGAG	-0.55;-0.1;0.29;0.32;0.64
Tnfsf12	0.329523	TGCTGGTCGTGGTCAGCCTG;GCCCAGGCTCAGCACCAGCG;CAACGCTGTCTGCCCAGGTG;GAATTCTTCCAGGCAGCGCA;GGAACTGAATCCCCAGACAG;GGCTGACCACGACCAGCAGG;TGGGCTGCAATAGCTCGGCG	-0.03;0.05;0.35;0.35;0.49;0.53;0.57
Tnfsf11	-0.0513044	GTTAAGCAACGGAAAACTAA;GCCTCGATCGTGGTACCAAG;GACCCTCGTGTGGGACGCCG;AGATTTGCAGGACTCGACTC	-0.98;-0.25;0.39;0.63
Tnfsf10	0.144998	GTTCAAGATCTCTCCATCAG;CTCACATTACTGGGATCACT;AGTACTCCTCCCTTGCCCAG;CTCCATTCCTAAAGAGCACG	-0.01;0.01;0.15;0.43
Tnfsf15	0.113333	GAAGTACATCAACAAATCCC;GAAGGATGGCAGAGGAGCTG;GGTCCCTCGGAATGTGATCT;AGGCTGTAGACACAGGCCAG	-0.21;-0.09;0.04;0.71
Tnfsf14	-0.426732	TCCACCAATACCTATCAAGC;GAGTACACATAGTAGTAACC;AGACGGACATCCCATTCAGG;CAGGAGAAACCAGCCCTGAG	-1.43;-0.41;-0.4;0.53
Tnfsf18	-0.241492	CTCACCAAACTTAACCATGC;ATATATCTGTACTACGAAGG;CTACGGCCAAGTGATTCCTG;GTGTGAATACGACATCTGAT	-2.15;-0.38;0.41;1.15
Psg18	0.0611519	TTACCACCCCAAGTGTATGA;GTGAAGGGGCTGAATCACAG;TTTCAAACCATAAGTAAACG;AGGGCTGATTGCATTTAACA	-0.9;0.18;0.38;0.59
Psg19	0.226991	GTGACAGGACCTGAGCACAG;TCTCCTTCGACCAATTTGGG;GAAATGGGCCCTGCCCACAG;GTTGAAAGCGTCACAGCACG	0.01;0.02;0.17;0.7
Setd1a	-1.77501	CCCCGCACTCGAAAGCACCT;GATCGACTTGGGGCACAGTG;GTAGACTGGGCCAAGAGTGG;TAGCTGTTCTCTGACCGCCG	-2.73;-1.93;-1.51;-0.93
Setd1b	-0.456159	TCATTATGTCCACAACTCAG;AAGCGGGACCCCAAAAGCGT;TCACAGGAAACAGTCCCGGT;GCTGCGAGTTAGTGCCAAAG	-1.4;-0.54;0.02;0.09
Arhgef10l	-0.0318129	CAAGTGTAATCTGTTGACCC;AATGTAGAATCTCCTTCACG;AGACGGTGTATGGAGACCGA;GATGCACATCCTCGTAAACG	-0.52;-0.28;-0.05;0.72
Olfr1061	-0.381594	ATGGTACCTGAAACTCATGG;TATACTGTAGAGATAGGGAA;AGGCCAAAGTTAACAAAGGG;GCCCAAGTTATCGACCAGTG	-1.13;-0.65;-0.02;0.26
Olfr1062	-0.882965	CTTCTTCCTCAGACACCTGG;AAAATACAACAGTTTCTGGA;CACACAAGGTGTCACAACAA;CAGAAATCCTCCCAGCTGCG	-2.19;-1.33;-0.37;0.35
Olfr1065	-0.307577	AGGCTAACTGTGTAGCACAA;CCACAGTTGTTGAATAACCA;ATGAGGATTGCAGCTCAGGG;CATGATTGTCCTTACAATGG	-0.95;-0.46;-0.02;0.2
BC024063	-1.51265	CCATATCCCTGATACTCACA;ACTTGAAGAGAACTTCGACT;TGAACTTCACCAAAGAAGAG	-2.3;-1.4;-0.83
Cavin3	0.0734458	TCCGTGCGTCGCATACAGAG;CAGCGGTTGGAGGCCAACCA;ACCACGGTGACTGCGTGCAC;GAAATTGGCCACCATGCTGG	-0.54;0.08;0.16;0.6
Cavin2	-0.170814	CAAGGTCAGCGCTCACACGC;GGAGGAAACTCTGCACAACG;CAGCGTCAGATCAACCTGGA;GGAAGATGAGCACTTTGAAG	-0.62;-0.61;-0.39;0.94
Cavin1	0.115071	CTCCGACGAGCTGATCAAGT;GTCAACGTGAAGACCGTGCG;GCTCACGGTGTTGCTCGTGG;GGACGACAGCTCGATCGCCG	-0.23;0.03;0.11;0.56
Cavin4	-0.101343	TAACAACAGACAGGGATGCG;TCTGTCCAGCACGGTCACAA;TCCCCCAATAGAGCTCTCCT;CTAGGATAGTCACTCCTGAG	-0.47;-0.38;0.2;0.24
Nkap	-1.18887	CGAAGCGTCGCAGTCCATCG;AGCCACTCAGCGAATGACTG;TCCTCGTCCGCCTATTACGG;TGATGAACATACACCAGTAG	-2.04;-1.3;-1.28;-0.13
Crtam	0.391284	TGCTGGGAACATACCTAACA;GCACTGCATTATCCAGCACG;TCTGAAAATGGAGACCGTCA;GTCCAATGTAACTCTCCGAG	-0.08;0.1;0.45;1.1
Gcnt3	-0.528396	CTCCACATAAAAAATCCCGC;GGAGGTATTTCCATGGCACG;CTGAAGACTTCTGATCCATG;CTGCTCAGGGGTCATTCGAG	-2.53;-0.16;0.14;0.44
Prame	0.0847936	TTTGTAGATCTCGGCAGCAG;TTACCCAGAAGAACAGTCCT;TCATCCGCCCAAGATAGTTG;GATCATGCGAGCCAGAAGAG	-0.21;-0.06;0.21;0.4
Csf1	0.135941	TCCATTCCCTAAATCAACAG;TTTGCTAAGTGCTCTAGCCG;GTGCCAAGCAGCGACCACCC;GGTGTCCATTCCCAATCATG	-1.01;0.24;0.43;0.89
Csf2	0.138601	ATATTCGAGCAGGGTCTACG;CTGCTCGAATATCTTCAGGC;CCGGCCTTGGAAGCATGTAG;GGATGACATGCCTGTCACGT	-0.43;0.01;0.29;0.69
Csf3	0.341185	AGAGCGCTGACAGTGACCAG;GACTTAAGCAGGAAGCTTCG;AAATACCCGATAGAGCCTGC;GGGGTGACACAGCTTGTAGG	-0.21;0.32;0.35;0.91
Dclre1b	-0.570097	TGAATGGTCAGAGTACGGGA;AGAGAAACATGACAGAACCA;TGCTAGACAAACCCACCGTG;TCCACTGAAGCATGGCAGAG	-0.97;-0.97;-0.84;0.5
Dclre1c	-0.0228461	TCAACTAAAGATATCTGCGT;TTTATTCACCAACCTAAGCG;CAGGGAAACATACACGACTT;GCATCAAGCCATCTACCATG	-1.23;-0.05;0.5;0.69
Dclre1a	-0.568338	AGCAACATAGAACTCGCAGA;TTGACGAACTCTGCACACTG;TGAGGGAAAGCGCATCAGAA;ACCAGAGGATCACCGCGCAA	-1.68;-0.46;-0.23;0.1
Sycn	-0.286818	CAGACCTGAAGAAGTCAGAT;GCAGTGTTAGACCAGCCCGA;ACTATGACAACTGCTGCCAG;GGGCACCGGGCAATTGCCAT	-1.0;-0.71;-0.16;0.72
Zfp583	0.161016	GTCCCTGAAAGTGAAATTAG;GATGTACAATTAGGTATCCA;TTGTTCCAGTAATGAGATCA;CCTACGCATGCGTCGAATGT	-0.03;0.07;0.21;0.39
Zfp580	0.261378	GGAGAGCCAGGTCCTCGCAA;TGAGGTCCGAGTGCGACACA;TCTGCTCATCGACGCCAACG;ACCTCCGGAGAGGAGGACCG	-0.28;0.07;0.19;1.07
Adap1	-0.372705	CCTGACTCATACCTCAACTT;AAGTACCGCCCTTCTACTAC;GAGGCAAGAATTCGTTCATG;ACAACGGACAGTTCTTAAGC	-0.88;-0.48;-0.33;0.21
Adap2	-0.0505671	CCTCCTGAAGTACTACACCA;CTTCTGGGACGACAGTATGG;TGATGTCTGGGAAGTTGCGG;ACTCACTTACAGGCAGTCGT	-1.26;-0.67;0.52;1.21
Pram1	0.00582965	ACAGGCTTGTTGGCTAGATG;TGGGGGAACTCATAGAACAT;GGTCCGAGGATGTTCTAGGG;CCCTGGACCCACACTTAGAG	-1.21;-0.22;0.22;1.23
Edc3	-0.296955	TACTCGGCCCTTCCACAATG;AGGAGATCGACACTTACGAG;GCAGTGCTCAAAGAGTTATG;CGGAGCCGATTGTGTACCGT	-1.0;-0.15;-0.06;0.02
Aak1	-0.0116717	AATATCCTCTTGCATGACCG;ATACCTGTACATTTGGAACG;GTTCACAGAGAGACCTATCA;ACTGGGGCTTGAATCTGCTA	-0.44;-0.16;0.27;0.28
Rpl15-ps3	-3.22792	TCAGCTGGTTAACACCATGG;GGCGTTTACGACCACCACGG;CTGGGATACAAGGCTAAGCA;GCTGGCGGTATTGCCAACAG	-3.54;-3.38;-3.24;-2.76
Edc4	-0.0213973	AGATAGAACTAAAGCACGCG;TTCTGCCAGTAGACCACCTG;TGTGGTGAAAGGCCATAGCA;TCAGTGTCAGCACTTCGGAG	-0.56;0.15;0.16;0.17
Avpi1	0.19934	GATAATCTGGGAGTGTGCAG;TCGTGAGCGAGCCACCCCTG;GTTTCAACACCTCAGACCCG;GGGCCTGTTCCAGCGCAGTG	-0.12;0.18;0.2;0.54
Nek10	-0.0997311	TGATACCAATGCCCACCAAG;ACGCCAAACAACATTATGCT;TTGTAGGTTAGAAAGCGTAG;AGTGTGGAAATCCGAATCTG	-1.18;-0.89;0.53;1.14
Asap1	-0.0355111	GATTCCACTCATACTCTACG;TGGATAAGCAAACGTCTGTG;AAAGCTGAACGAATTGCTTG;TTTCGGATCAAGTTGCAGAG	-0.98;-0.3;0.13;1.0
Asap2	-0.714938	TACAGCTTACATCAACCTCA;GATTCGTACTGAAATAAGCG;GAACGAGGAACAGTACACCC;TTTAAGGGTGATGACAACAC	-1.99;-0.34;-0.3;-0.23
Asap3	0.389966	AACCAACATGCTTGTCGCTG;CCTTGCTGACGTGCCAAGTG;GACTGAGGAGCATTACCGAG;TGAAGGGGCATCTAAGGGAT	0.27;0.28;0.47;0.54
Gm8697	-3.37645	AAGGATTCTTTGTATGCCCA	-3.38
Gm15834	0.230575	ACAACATGAGAAACAGTGGA;CCATAGGTATAATGGACAGT	0.1;0.36
Hyls1	-2.34368	ATGAACTTACAGTTCCAAGA;GAAATTCCTTGGTATTCACA;GCTGCGAAGAAAGCCAGACG;TGACACGGCTTGCTGTATGT	-2.96;-2.4;-2.03;-1.99
Sbspon	-0.515854	CTGCTGCTTCGACTACGACA;CGTCAGGAACCACTAAACGG;TCTGTGATGACGAGTACTCC;GACCCAGCCTGCTTCGCCCG	-1.44;-1.01;-0.02;0.41
Rps15a-ps4	-2.98264	CTTTAGAACATGGCCTGATG;ATCAACAACGCTGAGAAGAG	-3.02;-2.95
Rps15a-ps5	-2.94666	ATCAACAACGCTGAGAAGAG	-2.95
Apol7a	-1.04056	CCTGGACACATGGAGCACAG;ACCTTCAGGACAAGAACGAG;CTCAGCAAGAGATTCCTGCA;AGGAGATCCAAAATGATCTG	-1.62;-1.53;-0.68;-0.33
Apol7c	-0.632768	TAGATCCAGAAATAAGTCTG;AGGAGATCCAAAATGACCTG;CTCAGCAAGAGACTCTCGCA;CAGGTGCCAGAGCCAGACCA	-1.47;-1.14;-0.1;0.19
Apol7b	-0.772221	CCTGGCAGATAAGGTTGACA;TGCCAGAGACAGACCAAGGA;TGAAGCTAAAGCCAGCAAGC;AAGAACCTTTCCTTGTGCCA;ATCAGCTACGGTCTCACCCA	-1.67;-1.55;-1.08;0.17;0.26
Apol7e	-0.43087	TGCCAGAGACAGACCAAGGA;ATCAGCTACGGTCTTACCCA;TGAAGCTAAAGCCAGCAAGT;AAGAACCGTTCCTTGTGCCA	-1.55;-0.37;-0.0;0.19
Gm33167	0.289423	CGGCGTACGGACTGCTCTGG	0.29
Gm36176	-1.5838	GCAGTCATCCACCTGCCAGG;CAGACAGGTACACAGCAGGA	-2.0;-1.17
Ism2	0.0675363	TTCCAACAACCAGACAGCTA;CTTGGTGGGCAACCAGCTAG;CAGCAGAGAACGCGACCCTG;GCCATCCTCGAGTGGCCGTG	-0.84;-0.27;-0.02;1.4
Ism1	0.361767	CAGAAACGGACCCGTTCTTG;CCAGATTCCACAGACGGGGA;CCTTGGCCAGGACAAATAGT;GGACCCGCTGACGTTGCCGG	0.12;0.16;0.46;0.7
Fibp	0.287102	CTTTAAACGAGTCTTCAAGG;AAAGGTGCGGTAGTGGTCCA;ACCTGGCTAACCGGTCAGAG;CTGGTGAGCACCTCTCGATG	-0.41;0.38;0.49;0.68
Kcnmb1	-0.388748	CAGCTGATACATTGACCCAA;GGACAACTACCAGACAGCCT;AGTTGTACCCAGGACGTAGT;TGAAACTAATATCAAGGACC	-0.62;-0.58;-0.23;-0.12
Pcdha3	0.248947	CAACGTTGTTGTGACTGCCA;TCCAATGACAGATCATTGCA;TGTCACGGACAGTGGGTGCA;TCCAAATGGTACTGTAGTAG	-0.32;-0.3;0.43;1.2
Kcnmb3	-0.0746358	CCAAAGCTTCCATCAAGCGC;GTCCAAATCACGCTACAGGG;AAGTCACATTACCTTGGGGT;GTTCGTAAACCTGAGCCACT	-0.66;-0.39;0.03;0.73
Pcdha1	0.110553	TTGCGCGCACCACCTGTAGG;GTTTCCACTAGAGGGCGCCG;GTTGACACCTGAGTCGATGT;GATGGCCTGGTCAAACAGTG	-0.1;-0.07;0.24;0.37
Pcdha6	0.00526689	CCTTTACTGAGAACACAGGC;AGGCGCATTGTCGTTCACAT;GATGTGAAATCAAACAGCGA;AACTGCTCAAGAGTCTTGGG	-0.58;-0.21;-0.14;0.95
Pcdha7	-0.497301	AATCACATCATAGTTAGCGA;AAGGAACTAACCGTCAACTG;ACAATGCACCTACCCTGCTG;TTTGGACGAAGGCGTGAATG	-1.42;-0.23;-0.22;-0.12
Pcdha4	0.0910913	CCTGGACAGAGAGACAACAG;TGGTGGAATCGTGAGCCGGT;ATTACGGAAATCTTTAGACC;ATGCCTCAGATTTAGACGAA	-0.18;0.09;0.18;0.27
Pcdha5	0.167628	TTTAATGACTAATGTCCCGT;GGGCGAGCCTCCATCGCGAG;AGAGCGATGACAGTCGCCAA;AGTCAAGAATGCCAGACTCG	-0.33;0.08;0.45;0.47
Pcdha8	-0.593393	TTTCCGCAAAACGAGCCCAA;ACCGTGCAATGACCAATCAG;GTCCCAGATCCAAGCAACAT;GAAGGGGACATGATTAGTCA	-0.91;-0.86;-0.32;-0.28
Dupd1	-0.0394391	CATCGAGTACCACGGCGTCG;TTTCACGCACGTGCTGAACG;GTCTCGGTAGTAGTCCGGCC;CCAGTATACACACGTCAATG	-0.52;0.03;0.09;0.24
Fhad1	0.307627	AGGAGGAGGTAAATCGACTG;CCTGACACGAGCGGGCTGAG;CGAACCGCAGAATGTCCCCA;GCAGACCATCGTGAGCCTAG	-0.23;0.28;0.38;0.81
Cacna2d2	0.391278	AGCAGTTAGTGGAACGTGTG;GTGTTCAAGGAAGCTGTGCA;GTAATAGCGAGTGACTCCCG;AGTGATTCGGAACTACACCT	0.1;0.47;0.48;0.52
Cacna2d3	-0.400385	TCTTCAGAAGCTCTTTAACT;AAGTACTGCCATATGAGAGA;CAGGATGTTCTAAGTCATGG;ATGCTGTGCTGATCAACGAG	-1.4;-1.05;0.21;0.64
Cacna2d1	-0.048368	ATTCCCACGGACATCTATGA;GGTCAACATAATTATGACAG;TTGCAGCTTACTGTAAAACG;ATGATGTACGCAGAAGACCA	-0.93;0.24;0.25;0.25
Cacna2d4	0.0414876	TGAGTTCAATGCATCTCTGG;GAGGACCGCCATGATCAATG;AGCAGATCGAGACAACCGAG;AGAGAGACCCTACATTGACA	-0.55;0.07;0.17;0.47
Aagab	-0.52993	GGAATAGTACTTGTTATCGA;TGAGATTGCCGAGTCAGTCC;TGTGATAGAGTGTGTGACGA;TCCAATGTCGTGATGAAGAG	-1.74;-0.65;-0.2;0.47
1700066B19Rik	-0.279664	GCACAATGCAGATCGCCAGC;CCAGATATGCCCCCTCGAGG;TCTACTTGTGAATGGTTCGT;GCGATGATGGCAGCAAGCAG	-0.9;-0.43;0.02;0.19
Ndufv3	-0.105959	AGAGTCAGAGAAGAGTGCAA;GAGAACTGGTTTCTGTAGTG;AAGACACAAAGTGTGCTCAA;AGGACGGATCCGGGCGCTGA	-0.65;-0.11;-0.11;0.44
Ndufv2	-1.88425	ATTCAATACCTTGTTCATAG;TAGTAAAAAACTACCCAGAA;AAGGTGTAGTAGTGCAGACC;CTCTTACCCACTGAGCAGCG	-2.86;-2.09;-1.36;-1.23
Gm20885	-1.09142	CAGAAGCAGATGAAGATATG;TCACATAAAGAGAAAATGGA;CGATGACATAAAAGTTTCAG;AGCAGAAGCAGATGAAGATA;GCAAAACGAACGAACGAGAG;TTGAAGGTGATACCAAAGGA	-2.25;-2.2;-0.87;-0.73;-0.26;-0.24
Gm20881	-0.178657	CATTTCCTACAAGAAGGATC;TTGGCTGCAGAATTTCTCAC;TGAGGAAAAACTACTTTGTG;GCAGCCAACAATATTCCCCA;CAACCAGTGCGCCTGCGAGG;TAGGAGGAAGCCTTCTTCCC;ATGGCCTTCCAATGGGTGAC;AGAGGTACAACACAAATTTG;CCAGGAGCTGATAGACGTAG;AGTCCTGTAAGAATGGCACC;AGGTGGACATCCCTCACCTG;GCTGCAGAATTTCTCACGGG;AGGCGCACTGGTTGGCAGAG;GAGTGGGATGGTGCTAGCCC;GAAGCCTTCTTCCCAGGCCC;GCTCTGAGGACAACTGGAGT;AGCCTTCTTCCCAGGCCCTG	-1.54;-0.97;-0.6;-0.45;-0.31;-0.23;-0.17;-0.15;-0.09;-0.05;0.01;0.02;0.09;0.32;0.32;0.39;0.39
Gm20880	-0.178657	CATTTCCTACAAGAAGGATC;TTGGCTGCAGAATTTCTCAC;TGAGGAAAAACTACTTTGTG;GCAGCCAACAATATTCCCCA;CAACCAGTGCGCCTGCGAGG;TAGGAGGAAGCCTTCTTCCC;ATGGCCTTCCAATGGGTGAC;AGAGGTACAACACAAATTTG;CCAGGAGCTGATAGACGTAG;AGTCCTGTAAGAATGGCACC;AGGTGGACATCCCTCACCTG;GCTGCAGAATTTCTCACGGG;AGGCGCACTGGTTGGCAGAG;GAGTGGGATGGTGCTAGCCC;GAAGCCTTCTTCCCAGGCCC;GCTCTGAGGACAACTGGAGT;AGCCTTCTTCCCAGGCCCTG	-1.54;-0.97;-0.6;-0.45;-0.31;-0.23;-0.17;-0.15;-0.09;-0.05;0.01;0.02;0.09;0.32;0.32;0.39;0.39
Gm20883	-1.03401	CAGAAGCAGATGAAGATATG;TCACATAAAGAGAAAATGGA;TAAAAGGAGATGAAGACATG;CGATGACATAAAAGTTTCAG;TATGTCAAAGAATCTTTCAA;AGCAGAAGCAGATGAAGATA;GCAAAACGAACGAACGAGAG;TTGAAGGTGATACCAAAGGA	-2.25;-2.2;-0.99;-0.87;-0.74;-0.73;-0.26;-0.24
Oxct1	-0.226946	GAAGCGTTTATCACTCCGAA;AGCTGCAGGAACTACCGTGG;CATTGCCAGCAAGCCACGAG;TCTAGGGCACACTTGCCGAG	-1.23;-0.17;-0.13;0.62
LOC102634709	-3.35485	CATTGAAGGATGCAAAGATG	-3.35
Gpa33	-0.302058	TCTTACCGTGGAAACTACAC;CAGTGACACGGAGCACTCGT;CACCTATGTTTCAGACCGAG;GTAGTAACCCGCTGTCTCCG	-1.1;-0.39;0.1;0.18
Aadat	0.16395	ATAGCTTGGAGAGTATTGGA;GTCAACTACCCACCCAATCA;TTGAGAGTAGGGTTTATGAC;TGAGCATGGGATTATTCCAG	-0.75;0.1;0.55;0.75
LOC115489284	-0.0857315	TTGGCTGCAGAATTTCTCAC;TGAGGAAAAACTACTTTGTG;GCAGCCAACAATATTCCCCA;TAGGAGGAAGCCTTCTTCCC;ATGGCCTTCCAATGGGTGAC;AGTCCTGTAAGAATGGCACC;AGGTGGACATCCCTCACCTG;GCTGCAGAATTTCTCACGGG;GAGTGGGATGGTGCTAGCCC;GAAGCCTTCTTCCCAGGCCC;GCTCTGAGGACAACTGGAGT;AGCCTTCTTCCCAGGCCCTG	-0.97;-0.6;-0.45;-0.23;-0.17;-0.05;0.01;0.02;0.32;0.32;0.39;0.39
LOC115489285	-0.0857315	TTGGCTGCAGAATTTCTCAC;TGAGGAAAAACTACTTTGTG;GCAGCCAACAATATTCCCCA;TAGGAGGAAGCCTTCTTCCC;ATGGCCTTCCAATGGGTGAC;AGTCCTGTAAGAATGGCACC;AGGTGGACATCCCTCACCTG;GCTGCAGAATTTCTCACGGG;GAGTGGGATGGTGCTAGCCC;GAAGCCTTCTTCCCAGGCCC;GCTCTGAGGACAACTGGAGT;AGCCTTCTTCCCAGGCCCTG	-0.97;-0.6;-0.45;-0.23;-0.17;-0.05;0.01;0.02;0.32;0.32;0.39;0.39
LOC115489286	-0.0857315	TTGGCTGCAGAATTTCTCAC;TGAGGAAAAACTACTTTGTG;GCAGCCAACAATATTCCCCA;TAGGAGGAAGCCTTCTTCCC;ATGGCCTTCCAATGGGTGAC;AGTCCTGTAAGAATGGCACC;AGGTGGACATCCCTCACCTG;GCTGCAGAATTTCTCACGGG;GAGTGGGATGGTGCTAGCCC;GAAGCCTTCTTCCCAGGCCC;GCTCTGAGGACAACTGGAGT;AGCCTTCTTCCCAGGCCCTG	-0.97;-0.6;-0.45;-0.23;-0.17;-0.05;0.01;0.02;0.32;0.32;0.39;0.39
LOC115489287	-0.0857315	TTGGCTGCAGAATTTCTCAC;TGAGGAAAAACTACTTTGTG;GCAGCCAACAATATTCCCCA;TAGGAGGAAGCCTTCTTCCC;ATGGCCTTCCAATGGGTGAC;AGTCCTGTAAGAATGGCACC;AGGTGGACATCCCTCACCTG;GCTGCAGAATTTCTCACGGG;GAGTGGGATGGTGCTAGCCC;GAAGCCTTCTTCCCAGGCCC;GCTCTGAGGACAACTGGAGT;AGCCTTCTTCCCAGGCCCTG	-0.97;-0.6;-0.45;-0.23;-0.17;-0.05;0.01;0.02;0.32;0.32;0.39;0.39
LOC115489283	-0.0857315	TTGGCTGCAGAATTTCTCAC;TGAGGAAAAACTACTTTGTG;GCAGCCAACAATATTCCCCA;TAGGAGGAAGCCTTCTTCCC;ATGGCCTTCCAATGGGTGAC;AGTCCTGTAAGAATGGCACC;AGGTGGACATCCCTCACCTG;GCTGCAGAATTTCTCACGGG;GAGTGGGATGGTGCTAGCCC;GAAGCCTTCTTCCCAGGCCC;GCTCTGAGGACAACTGGAGT;AGCCTTCTTCCCAGGCCCTG	-0.97;-0.6;-0.45;-0.23;-0.17;-0.05;0.01;0.02;0.32;0.32;0.39;0.39
LOC115489288	-0.0857315	TTGGCTGCAGAATTTCTCAC;TGAGGAAAAACTACTTTGTG;GCAGCCAACAATATTCCCCA;TAGGAGGAAGCCTTCTTCCC;ATGGCCTTCCAATGGGTGAC;AGTCCTGTAAGAATGGCACC;AGGTGGACATCCCTCACCTG;GCTGCAGAATTTCTCACGGG;GAGTGGGATGGTGCTAGCCC;GAAGCCTTCTTCCCAGGCCC;GCTCTGAGGACAACTGGAGT;AGCCTTCTTCCCAGGCCCTG	-0.97;-0.6;-0.45;-0.23;-0.17;-0.05;0.01;0.02;0.32;0.32;0.39;0.39
LOC115489289	0.0177392	TGAGGAAAAACTACTTTGTG;GCAGCCAACAATATTCCCCA;TAGGAGGAAGCCTTCTTCCC;AGGTGGACATCCCTCACCTG;GAGTGGGATGGTGCTAGCCC;GAAGCCTTCTTCCCAGGCCC;GCTCTGAGGACAACTGGAGT;AGCCTTCTTCCCAGGCCCTG	-0.6;-0.45;-0.23;0.01;0.32;0.32;0.39;0.39
Cfap157	-0.406354	GGCCATCTTTCGGAACTCTG;TCATGGCCAGAAAGAACATA;CGTGACTCTGCAGCTAAACA;CTGGAATTCATGGCGCACCT	-1.28;-0.49;-0.4;0.55
Cdc27	-1.21375	CAGGTATTTACACTGTGGGG;ACTCCTCTATCATTTCAGAA;ACAGAGTGGAAATAGTCGAG;ACTGGTCGAAGTTTATTAGG	-2.4;-1.87;-0.37;-0.21
Cdc26	-0.237006	CGTCGAGCTTGAGCTCTAAG;CTAGGCCCGTAAGAAGCAGA;GAGCATTCGCAAGGACCTGG;GCTCAAGCTCGACGACATTG	-2.18;-0.23;0.52;0.94
Cdc23	-2.73662	TGATGTTAAAGAGTATGACC;GGTATTTATCAATTTCACAG;GAGATGCTGATACTTCTGCA;GAAGGGACAAGTCAAAAACG	-3.42;-3.12;-3.01;-1.4
Cdc20	-2.08247	TGGAGACTACATATCCTCGG;ACTGAGGGAGCTTACTCGAG;ACAGATCACACAGCGCCGGG;TGCCAGATGTCGTCCATCTG	-3.99;-2.93;-1.43;0.02
Olfr772	-0.246279	CACAAGTCTTCTGCAGACTG;AGAGGTCAGTAAAAAATACT;CTATGTTATACAGGTATCTG;AGAATTCAGTTACGCCAAAG;TCCAGAAATGCTCAGTGAGT;AGAACTGCAGATTTAGGCCA;GTTCTTAAGGAAATAGTACA;GGTGAGGATCCACTAAGATG	-0.65;-0.65;-0.49;-0.48;-0.37;-0.16;0.19;0.64
Olfr773	-0.246279	CACAAGTCTTCTGCAGACTG;AGAGGTCAGTAAAAAATACT;CTATGTTATACAGGTATCTG;AGAATTCAGTTACGCCAAAG;TCCAGAAATGCTCAGTGAGT;AGAACTGCAGATTTAGGCCA;GTTCTTAAGGAAATAGTACA;GGTGAGGATCCACTAAGATG	-0.65;-0.65;-0.49;-0.48;-0.37;-0.16;0.19;0.64
Olfr770	-1.16814	ACCAGTTATATTCAACAAGT;GATTTCCTGCTCAGACACAT;GGTGACAAGACCATTACCTA;GCAGGCAGTGCTCATGATGG	-2.72;-1.28;-0.48;-0.2
Olfr771	-0.65389	GCTATGTTGTACAAATATCG;TGTAACCATCATGAGCAGCA;AAGTTTAGGAACAGAGTGAG;GTGGGAGTCTAATATAGTGA	-2.04;-0.88;-0.32;0.62
Olfr776	-0.367655	AAATCTAGGGATAGAAACAC;TACATAGCGATCGTAAGACA;CAGAAATCCTGCCAGCCATG;AGCAAGACAGTTGTAAAATG	-1.19;-0.89;-0.0;0.61
Olfr777	-0.329979	ACAGATCCTACTGCTCATGA;GCTATATGCTGAGTATGACT;CTGTGCATGAGATCTTTAGG;GCAGATAGTGATAGTTTCTG	-1.04;-0.22;-0.13;0.06
Olfr774	0.0167995	AAATCTAGGGATTGAAACAC;ACTGAGAGTCTAGCAATGTG;CAGAAACCCTCCCAGCCATG;AGCAGGAGAGCTGTAAGATG	-1.19;-0.15;0.51;0.89
Olfr775	-0.16909	AAATCTAGGGACAGAAACAC;AGCAAGACAGCTGTAAAATG;CAGAAATCCTATCAGCCATG;GTACATAGGAGTCTTTAACT	-0.82;-0.21;0.09;0.27
Olfr779	-0.200134	TAGAACATGAGTGTCTGTGC;TTCTTGACGACCATTGTGAC;TTCAAACCCATGGCCAATGG	-1.03;-0.5;0.92
Nol11	-1.19408	CAGTTCCGGGGGTAAAACGA;CCTCACCTTGTAAAGGACGA;GAATAATGATGACGTAAACG;ACAGATTCGATGTTCTGCTG	-2.61;-1.32;-0.62;-0.23
Nol10	-1.90945	GATTAAACTTAGAACAAGGG;GGATATCAGACTCTACCACA;AATTGTCAAAATGTGGAACA;ACTGATATGTGTCATAACAC	-2.33;-2.14;-1.97;-1.2
Nol12	-1.20372	ACCTGACAGGCTTCCACAAG;AGTGACAGCGAAGACAGAGT;TCAAAGTTGAGAACGAGCCG;GTTTCTCTAGCAAGGGGACC	-2.09;-1.47;-1.45;0.2
Morn5	0.220812	CACCGGGAGCCAGTATTTCG;CGTCGAATCGGCTCCCACTG;GCAAGTATACCTTCAATGAT;TGTATCTCGTGTCAGTAGGG	-0.25;0.17;0.32;0.65
Morn4	-0.281159	TGACAACATGACCTTTGAGG;CAGGGCAAGTTCAATGGCGT;GGTCAATTGGTGTTTGCAGA;TCCAGCGGGGAGGAGTACCG	-1.63;-0.06;0.18;0.38
Morn1	0.0451934	ACAACAAGAGACATGGCCGT;AGCTGTACACTCAACGTGAA;GTCATGAAGTACAAAGCCGG;GCACTTTCCACAGTAGACCC	-0.37;-0.13;0.03;0.65
Morn3	-0.117745	AACAACGGCGACATCTACGA;AGAGCCGCCGTGGAAAGGGT;GGACCCAAGGAGTATTACGA;GTGAACGGCGATCACTACGT	-1.05;-0.07;-0.02;0.67
Morn2	0.0453072	CCAACTGGGGCAAAGTACAC;GACTTACACATTCCCAACTG;TGTGTATGAAGGACAGTTTA;ACAACATGTTTCATGGACTG	-0.82;-0.25;0.43;0.83
Zbtb22	-0.0636908	ACCCGCACTGCCAACCACAG;AGTAGTGACAGTGGTTGTAG;AGAAATCAGTCGACTCCCGG;GGTACACGTGTCCTTCCCTG	-0.98;0.07;0.14;0.51
Zbtb20	0.0702622	CCTAGAACGCAATGAATCCG;TTGTCAGTGAATGTGTCGAG;CGACATCGAAATCCCGTCGG;CGCATCGTGTCACAGAACGT	-0.23;-0.2;0.14;0.57
Zbtb21	-0.0789264	CAGCGGGCTCACAAACACTC;TTATGATGCACAGTGTACAG;ACAGCGGGCTCACAAACACT;GGCTCACAAACACTCGGGAG	-0.97;-0.04;0.32;0.38
Zbtb26	0.00211195	CTCCAGGTGACGGAATACCC;TTTACTGAATGATTCCCGAG;GTGTGCACCGTTCTACAATG;CTCCCTGATAAACTCAACTG	-0.24;-0.12;0.14;0.23
Hils1	-0.836375	ACAATATGACCCATAACACC;CAGAATCACATACGACATGG;TGAAGACTTTGGCTGACAAG;ACCAAGATGCCGGCACACTG	-2.02;-0.98;-0.25;-0.1
Zbtb25	-0.0306254	AGAAAACAGCTGTCAAACAA;AGTAGCTGAATATATCGGGC;TGTGGATCATAGTCGTTTGG;CCACTTATGCCATTACTGTG	-1.44;0.02;0.46;0.84
Psd3	0.0762604	TCTAGACAGATTCAAGAGAT;TCTCATCAGTACCTTCTGAG;TAGATGCTGGTTCTGAAATG;GTTGAGCAGCATCATAGCAC	-0.24;0.07;0.18;0.3
Psd2	0.0713821	GGCGAACCAGATGTACGTGA;CCAGGCCATTGGTCAAAGAG;AACTTGGACCAGCTGAACGA;GAGGGCTCGAGATAGCCCCG	-0.74;0.05;0.19;0.78
Otud5	-0.724754	AGCTGCCGCAGCGCGAATCG;CCATAGCCTGCATTTCAATG;AATTATAGTGGATATTCCGG;CTCTTGGTGCGACAACTGCG	-1.34;-1.24;-0.74;0.42
Otud4	-0.775275	TTAACTGCCTGAATTGACAC;TCCTCAATACAGGAATGGGT;TGCTGTCTTACACCCGATGA;ATTTAAACCCTCAGGCAGTG	-2.5;-1.96;-0.0;1.36
Otud3	0.296099	CGGAACCGGCCCGATCCTGG;TAATTTAATAGTCCAGAACC;AACACTATGACAGCGTCCGG;AAGAAACCATCAATTGAATG	-0.64;-0.01;0.5;1.34
Otud1	0.238223	CAGGCAGAGGAACCGCGACG;TCGGAGCGCGTCAGACCCGG;AGTTCCTGTCCGGAGCGTCG;CTCTCCGGTATCCGGCTCCG	-0.22;-0.01;0.18;1.01
Adamts12	-0.555377	GCTGCAGACGGGACTCGTTG;TGAGCCGAACCACAACAATG;TCGATGAAAAAGTCTCCATG;AATGCTACAGAGGATCGCTG	-2.1;-0.38;-0.18;0.44
A4gnt	0.0821723	GCCATCATCTGGAAGTACGG;CACTATGACTCAACCATTTG;ACAGCACAGGAGACCATCGG;AAACATTATTAATGGCCGAG	-0.49;0.13;0.33;0.37
Gphn	0.218263	TGAAGGAGTAGTGCTAAGGG;ATCGGCCATGACATTAAGAG;GCTTTGTCCATAGACGTCAG;ACCACGAGATGTCACTCCAG	-0.58;-0.4;0.66;1.19
Fam76b	0.0837578	TAAAACTCTCTTGTATGACA;ATTATGTTACAGTACTGACA;TTCATTCTGAATTGCTGCAG;CCCTGCGAGAGCTCCTCGAA	-0.84;-0.17;0.5;0.84
Fam76a	-0.396295	CACTGTTCACAGGAATATGG;CTGTAGGACCGAGTACCAGC;CACCTGAGCAGCTCTTCTCG;CCTTCGAGGCGCTGTCTCAG	-1.72;-0.27;-0.25;0.66
Olfr380	-2.16809	TGTACCTCACCACCATCCTG;ATTTATATAAATATCAGAGC;CATAGGCCATGACCACAAGG;GATGAGGTTCCCCAGGATGG;ATTCAGTATACTAATCACCC	-3.01;-2.45;-2.42;-1.63;-1.32
Psd4	0.0663787	ATTCAGTTGATAGAGGCGCA;TCCACCCTCCATACCTACTG;GCCAGCCCAGAATACCACCT;CCTGACTCAACCCATACTTG	-0.23;-0.18;0.21;0.47
Olfr385	0.412346	TGATGCTGGTATAACGAAGA;AATAAGTACAGTGTGCAATG;GAGCTAACGATATTTATCAC;GAAACAAGTATATGGGTGTG	-0.01;0.04;0.23;1.39
Ang-ps2	-0.239007	AAGGTGTTGACTTCTTTGCA	-0.24
Vps35	-0.59586	GATTTGGTAGAAATGTGCCG;GAAATGTTACCCTGATCGTG;AGTCAAAGTACTCAAAAAGT;CAGCGAAGTCTTCTGGATCA	-2.05;-0.52;-0.41;0.6
Vps36	-1.47887	AACCGATAAAAACATTTCTG;CAGGTACGACTTAAACCTGA;TTTCATCAGCGCCAAAATCG;GGTGCGCGTCTACGACGGCG	-2.62;-1.53;-1.33;-0.44
Vps39	-0.0656314	GAACAACCACTGTCATATCG;TCTCATTGACTACCTGACAC;TCTGACTGTGGTGCTTAACG;GCAGAGACTCTACCTCCGGG	-0.63;0.0;0.08;0.29
Adamts14	0.347191	TAATACCCTGCATACCCGAG;GACAAGGGCGATGTTCACGT;AGCTGCAGCGTGTCCCATCG;TTCCCGGCGGTATACCACAT	0.2;0.24;0.31;0.63
Gm38185	0.0717422	TTGTACCTCTCTGCCAACCA;TAGGAGGAAGCCTTCTTCCC;AGAGGTACAACACAAATTTG;ATTTCTCACAGTTGGAAGGA;AGGTGGACATCCCTCACCTG;GAGTGGGATGGTGCTAGCCC;GCTCTGAGGACAACTGGAGT;AGCCTTCTTCCCAGGCTCTG	-0.47;-0.23;-0.15;-0.09;0.01;0.32;0.39;0.8
Lhpp	-0.300729	GGACGTTGGAGGTTACATGA;GCTGCTATCACATAGCACCC;TTCCCAGGGATATGAGCACG;CCTTCATGGATAAGCAAGTG	-0.6;-0.44;-0.35;0.18
Pde4dip	0.473175	CGAAGGACAAAATGACACAA;TGTCCGTCTGAAATCTCCCA;TCAGACTGTGACTTAGGTGT;CTGGCGAGGAGAACAAGGCG	-0.32;0.19;0.69;1.33
Gm10109	-0.0611661	CTTCACCAAATATCAATGTG	-0.06
1700016C15Rik	-0.313102	AGGCTATATATCACTCACCA;CTTACCTAGGTGGAATCGAT;GGAATTGTCAAGTCTATAAG;AGCGTTTGCTGGTCTAATTG	-1.01;-0.6;0.06;0.3
Eef2	-1.59228	GTTGTGAGCTGCTATACGAG;AGTCAGCCAATAGCCCAGAT;CCTACGGCGAGGGCGAGAGT;CCGATTGAGGACGTGCCATG	-1.7;-1.59;-1.55;-1.53
Gm5096	-0.402343	GCAGTTCACGCCGACAATGG	-0.4
Gm11816	-0.334295	AGATGATCCCGGGATTAAGA;CTGCCAATTGGGATCAGAGT	-1.16;0.49
Gm11814	-1.8201	GTCATGGAAGACAAACTCAA	-1.82
Gm11810	-2.51649	AACAAAACCAGAGTGATCTG	-2.52
Eif4e3	-0.29675	GGCTAACGAGCCTCTCGACA;AAGTGATAACTACATCTCAA;CTACACGGTACAAACAGTGC;GAGGAGAGTAATGCGAAGGG	-0.97;-0.25;-0.1;0.13
Insyn2b	0.247197	CTATTGGTATTTGAGCAGGG;CACGACTAGCAAGTCCCTGG;TCAGGCGAACTGTGAGTCCG;GAATCCAACTGGCGTGACCG	-0.52;0.29;0.38;0.84
Gm13413	-3.45741	TCAGCTGGTTAACACCATGG;GGCGTTTACGACCACCACGG	-3.54;-3.38
Gm13414	-1.85124	ACAGGCACTTAAATGGCACC	-1.85
Padi3	0.436931	AGAATCGAAGACCACCGGCA;GTGACATGAACTGTGCGGAC;ATGGGAAGGAGTATCCCTTG;AGGCGGTGGTGCTTCAACAA	-0.04;0.14;0.58;1.08
Slc31a1	-2.38201	GGACTCAAGATAGCCCGAGA;TTGGTAATCAATACACCTGG;TCAGCCTCACACTCCCACGG;TGTGGTTCATACCCATATGG	-3.15;-2.63;-2.54;-1.21
Slc31a2	0.114079	GGACCAGACCAGGATTCTAC;CAAGATGAACTGCTGGCTGT;CTGTATGAGGGCATCAAGGT;CAGACAATAGGACCCGCCTC	-0.32;-0.02;0.39;0.4
Camk2n2	0.220885	AAGAGAGGTCGGAACCTTCG;CTTCGGGGTCTGCGCCGAAG;GTTGCCAGCGAAGAAGGAGT;CGAGATCCTACCCTACGGTG	-0.33;0.11;0.45;0.65
Camk2n1	0.158556	CTCAGCTTCTCGTCGCCGTA;GGACACCAACAACTTCTTCG;AAGCTGAGCCCCTACGGCGA;AGTTGTTGGTGTCCTGCAGG	-0.43;-0.28;0.26;1.08
Gm5630	-2.78135	TGTCCCTCCAGTAAATATCG	-2.78
Ctbs	-0.213977	CTCACGTTGGAAACTCTCTG;CCAAAGCACAGTATATGGAT;CTGGTCACAGATTACAACTG;TGACCTCGAAGTCGGGACGG	-0.75;-0.54;0.07;0.36
Mtm1	0.146531	TTACCACTCATACCGACAAG;AGGGAACCACCAAAAGAGCA;ATGGGAGGCGCGACAAGTAG;TCTGACCGGTGCCATTCAAG	-0.37;-0.18;0.26;0.87
Crhbp	0.149476	CCAACTCACGCAGAGCCCGT;CAGGAGAGGGTCGTAGACCG;CTTCTTCATCGGCGAACCCG;TCTCTCAGACTCCGAGTGGA	-0.24;-0.18;0.27;0.74
Gm32112	-1.4507	GGCACCAGGAATCCTCCACG	-1.45
Hmgn5	-0.337548	AGAAGTAAAAGAACAAAACA;AGAGCACAAAGATACAGGTG;AGCCAAAAGTGAAGATGCAG;TCTGCATGAGGAAGTTGGAA	-1.61;-0.74;-0.32;1.31
Hmgn3	-0.0664678	ACCAAGAAAAACATCAGCTA;AACCAAGCTAACTAAGCAGG;AGGACTTACCGCGGACAACC;AGATTAGCAGAGGTGCTAAG	-0.68;-0.46;0.19;0.69
Hmgn2	-1.42783	AGGTACCCAAGGGGAAGAAG;AGCCACAGAGAAGATCTGCG;CAAAACCAAGGTGAAGGACG;AGGCTGGCTTACCTTCGCAG	-3.1;-1.72;-0.53;-0.37
Hmgn1	0.0219099	TTCGAAACCTACCTTTCCCG;TAGCGCGGATGGAGCCGCCA;CTTTCTCCTGCAGGTTAGCG;ACTTACGGCCGACAGCCTCG	-0.26;-0.11;-0.01;0.47
Specc1	-0.0188203	GCCTTTGATAAGAACCCTGG;AGTGATATGCTCAAAATCTG;TTTGAGCTGGAGGGACCACG;GCGGTGTAATAATAGTGTGA	-0.49;-0.45;0.38;0.48
1700018F24Rik	-0.680772	TGCTTCAGACAGGAATCCCA;GGGAGTCAAAAAAATGCTCA;AGAATTCGATAAAGAATCCA;AGAAAGCTGAATATGGCACT;TGCAAGAGAATCTGGCTCTG;TAGGTACTGTAGCACCTGGG;GCTGGAAAGACGGATACCTG	-1.72;-1.22;-0.91;-0.88;-0.28;-0.06;0.3
Cd74	-0.0410979	CATGGATGGCGTGAACTGGA;CCATGTGATGCATCTGCTCA;AGCCGTGGAGCTCTGTACAC;GCTGATGCGTCCAATGTCCA	-1.05;-0.21;-0.04;1.14
Cd70	-0.256035	CATCTGCGTATCCATCAAGA;AAGGACCCCACACTGCGCTG;TTGGGAAGGTCCTTCACACA;AGCTGTAACTCAGCTGTGTG	-2.13;0.0;0.44;0.67
Cd72	0.03744	GCATCTAACCATCTAGGACA;AGGGAGAAGATAAGTCAGCT;GGGTAAGACTACGCACAGCG;GTCCTGTCTGATGTTAGGGG	-1.28;0.09;0.14;1.2
Dcxr	0.0476484	CCTAAGCAATGTGGGACCCG;TATGGTTGGTCAGTGCACGT;GGCGGTGAGTCGGACGCGAG;GCCAAGGGCATGATAGCTCG	-0.39;-0.11;0.18;0.51
Nudt22	-0.0332235	CCTATCTGGCAGACCCACTG;GTACCACCAGCAACCCGGGG;TTGGGAGCATCAAAGATCCA;GACCGTCGTCCATTGCCTGG	-0.3;-0.06;0.05;0.17
Nudt21	-1.92074	CCTGGTGGGGAACTTAACCC;AGCCAGATTTCAGCGCATGA;ACTAAAACGCTTAATGACAG;CCGAACTGGTTGACCCCCCG	-2.91;-2.3;-1.81;-0.66
Fam162a	-0.611975	TGCTGCGAAGAACAAGCTCC;GTGGTCAGGCCGCTTCAAGA;CACAGAGTCTTACAGACACG;TGGATTCTGCACCAAGCCAC	-1.16;-1.02;-0.62;0.36
Fam162b	0.165998	CTTCACACTTACGGTACAAG;AGCCGCAGCGTTCTGCGACT;CAGGGGTGACACGCGACCCG;CCTGGGGGCTCAAATCCGCT	-0.51;0.14;0.19;0.85
Npm3-ps1	0.323075	GAAACTGTCCATTGTGACCG	0.32
Vmn1r56	-0.65147	CAAATGTGACCACCAGCATC;AGAATAGCTCACGACCTTGG;TCTGTTTAAATGAATCACCA;AAGAATAGCTCACGACCTTG;CCATGTTGTAGTTGGGACTG;TTCTTTCACATGGTGGCTCG;TCTTGACTGATTCCCGACTG;TGTTCCTGGTAACTGCGCTA	-2.23;-1.53;-1.28;-0.34;-0.1;-0.04;0.14;0.17
Vmn1r57	-1.0377	CAAATGTGACCACCAGCATC;AGAATAGCTCACGACCTTGG;TTGGATATGCTCCATCTCTG;TGGTCCAAGCCATAATGCCA;AAGAATAGCTCACGACCTTG;TTCTTTCACATGGTGGCTCG	-2.23;-1.53;-1.05;-1.04;-0.34;-0.04
Vmn1r54	-0.791864	ACATCTTCAAGTACATTCGT;GCAGTTATATATGTTGCAAG;TACAAAGATGACATCCCTGG;GATTGAGAGTGACAGCCTGG	-1.82;-0.88;-0.31;-0.15
Vmn1r55	-0.6003	CAAATGTGACCACCAGCATC;TTACATCCCAATGAATGTCA;AGAGTATCTCACGACCTTGG;TTCTTTCACATGGTGGCTCG;AACAAGAGTGACAAATTGGT;GAGGATGTGCTCTATCTCTG	-2.23;-1.79;-0.33;-0.04;0.03;0.75
Vmn1r52	-0.281007	GATATATATAAGATTAACAA;GTGCCCACGAATGAACATGA;TTGCTAAGTGAGAGCTTTGA;ATGTTGCATTGATGAACTCA;GAAGACACTCAACAGGCAAG;ATTCCTGAAAGCCAACAGTG;TATTAGGGCCACAAAGCCAA	-1.8;-0.94;-0.61;-0.42;-0.13;0.56;1.37
Vmn1r53	0.243862	GCTTCTAGGACTAAGTGTGA;GAAAGGCACAGGAGATGTGT;AATTCTCTAAGGTCAAATTG;GGCCATGAGACCAATAAGTA	0.01;0.11;0.24;0.62
Vmn1r50	-0.196817	AACATACAGAAAATTATCTG;GCTTCTAGGACTAAGAGTGA;TCTCATGAAGGAGCTTGCAG;TTTCCACAATGATGACCATG	-0.91;-0.55;0.11;0.56
Vmn1r51	-0.129889	TATGATGAATGAGAACAGCA;TGTGCCCATGAATGAACTTG;TGACCAGTAGCATTAGTAGG;ATTTGTGGTTAAATTTGGGG	-1.59;0.18;0.4;0.48
Gm7168	-0.904498	TTTCCAGAGGAATAACTCAG;GTGTTTGAGACCAAAACAAG;CGGGCATGGGACTTACGCCA;TATGCACTATACCAAGTCCG	-1.88;-1.36;-0.91;0.54
Gsdma	-0.00547367	GGAGGTGCAGACGCTCAGCG;ATGCTGTCATTGCAAATGTG;TGGAGAAGTTAAGTCCAGTG;ACGCGGGGAGAACCTCTATG	-0.36;-0.19;0.18;0.35
Gsdmc	0.247166	TCCCACAAATCTCATTGGAA;GATGTCGAAACCATTGCAGG;AGAGGCCTATGAAGTGACCA;ATGAAGTTTCTGAACAAACA	-0.95;0.52;0.61;0.81
Gsdmd	-0.708767	CAGTATACACACATTCATGG;AGGTTGACACATGAATAACG;CTGCTTATTGGCTCTAAATG;TGAGGAGGAATTAATTGAGG	-1.98;-1.46;0.25;0.35
Gsdme	-0.109927	AAGTGTGAGAACCATAAGAG;CAGAAAGGCGAACTCTCTGT;AGAAATCACGCACTTCTGCG;TTGCCCATAGGTGTCAGCAA	-0.71;-0.22;-0.09;0.58
Vmn1r58	-0.910567	TTCAATATGCTCCATCTCTG;CAAATGTGACCACCAGCATC;AACAATAGCTCACAACCTTG;TCTGTGTAGGTGAATCACCA;GCTTAGGAATATGATGTCAT;TGACCCTAGCCCAGGTACCA;TTCTTTCACATGGTGGCACG	-2.41;-2.23;-1.18;-0.93;-0.31;0.25;0.44
Vmn1r59	-1.38624	TTCAATATGCTCCATCTCTG;CAAATGTGACCACCAGCATC;GTGAATCATCATGGAGACAC;AGAATAGCTCACGACCTTGG;AACAACAGTGACAAACTGGT;AAGAATAGCTCACGACCTTG;ATGTAGACATGCATTTCTTG	-2.41;-2.23;-2.06;-1.53;-0.84;-0.34;-0.3
Azi2	-0.33485	GGAGATGTCTAACTTACACC;AGCAAGAGCTGGGACTACTG;ACTTCTGCAGCTAAGAACAG;GGCCTATCATGCATATCGTG	-1.37;-0.1;-0.01;0.14
Hadh	0.0104027	CCTTTCAACCAGCACCGATG;AGCAAATCGGTCTTGTCTGG;AAGCATGTGACCGTCATCGG;TGGCCATACAGTAGTATTGG	-0.56;0.08;0.13;0.39
Acsf3	-0.242386	ATATGGCCATCACACCTACA;CATGAATACGGTAATCTGTG;CACAGCGGCTAGGTTACGGT;GGCCCACTGTGCTACAACGT	-1.06;-0.5;0.27;0.32
Gnptab	0.0714538	TGTTTGCAATGGACGCGTGG;CATGCTGGACCGTTTAAGGG;AGGAGTGAAATATTTACCCG;TCTGCCCATGCCAATCGACG	-0.39;-0.06;0.28;0.45
Mcidas	0.134603	GAAAGACGAAACATCACAAG;GGGAAAGAGTACCTGCGACG;GGATGCTGGACCTGTCGCGG;CAGCCCGGTGGCGGTGTACG	-1.18;0.12;0.45;1.15
Knl1	-1.39609	ACAATCGATGAAAACCGTAT;ATAGTCTTATCCAGATCACC;TCTTCTTCTGATAATTCGGG;TAGTCAAAGTGCCAGCACAT	-1.71;-1.63;-1.48;-0.76
Tgfbr3	-0.0964913	CATCTTCGGCTTGAGAACAA;ATTGTCACATTTGACTGACA;GCTGTGGTACTAGACATAGG;AACCTCCGCAGTACAGACCA	-0.31;-0.27;-0.09;0.27
Tgfbr2	0.586948	CCTTGTAGACCTCGGCGAAG;CCTACGAGGAGTACTCCTCG;GAAGCCGCATGAAGTCTGCG;ACCTGCAGGAGTACCTCACG	0.41;0.56;0.63;0.74
Tgfbr1	-0.202862	ATTGTGTTACAAGAAAGCAT;GTGTCAGATTATCATGAGCA;AGAGCGTTCATGGTTCCGAG;ATGAAAGGGCGATCTAGTGA	-0.89;-0.31;-0.01;0.39
Gm2075	-1.94793	TTCTCAACTTTCCTCTTATG;AAGGCAAAGGAGGCAAAAAC;TGCTCAGGTGACCAAAATGC;TGAATCTGAGAAAAGAGAGT;ATGTTCTGGAAGTTCTCCAT;ATATGGGCAAGAGTATGCTC;TGTGTCCATTTCATTGATTT	-2.54;-2.39;-2.25;-2.23;-2.22;-1.85;-0.15
Gm2077	-1.34997	GAGTTCCAATGAATTCACTC	-1.35
Alg11	-2.08151	AGTGAACATAGCTTCCGACT;GGAAACCAGCAAATGCCCTG;TAAACCATATCCTCTCACTG;TTTCCTGGACTGATGATATG	-3.73;-2.44;-1.84;-0.31
Cyp2c39	-1.14011	AATAATCAATAAAATCACGA;AATGGGAAAAAGGAACATTG;ATACCCATGTAATACAACAG;TCAATAACCTCTTTGCTGCA	-2.29;-1.6;-0.36;-0.32
Cyp2c38	-0.877404	AATAATCGATAAAGTCACGA;ATACCCATGCAATACAACAA;AGAAGAAGCACAGTGTCTTG;GACAGAGGTCTAGAAGAGGG	-2.07;-1.38;-0.71;0.66
Alg14	-2.17494	GCTTTATTCGGAGAACCAGT;TGTCCAATGCCTATTCACCA;CCGAATTCCGAGAAGCCGGG;AAGAGTCTGAGAGACTCTCG	-3.67;-2.98;-2.08;0.03
6430550D23Rik	0.315253	GGAGGACAAAAGCTCTCTGG;CAGAACCAGTTACATTGCTG;TGAGCGAGCATGGGACAGTG;GGAAATCAAAATGGTGCAGG	-0.07;0.36;0.45;0.51
Rhbdl2	-0.110652	AGAGGGAAAGGAAGAACCGG;GCTCCCACAAGAGACTTGAG;TTCTCAGGGCAGTACGTCAA;GGTCCACAAAGGCCTCCGAG	-0.57;-0.09;0.06;0.16
Gm8765	-0.810611	GCATATCGATATCAGACCCA;AACTCCACACATAAAGCCAA;CTACCAAGTTTGGTATCACA;CCAAGTTTGGTATCACACGG;AATGGAGCAAACCACAGGTG;TCTCCAGGTTGTACAGATGG;AAGCAGGTCTCTGAACACTG;TGAATAGCATTATTGATCCA;TCTCAGATGCTGGTGACACT;AGCATATCGATATCAGACCC	-1.92;-1.74;-1.22;-1.17;-1.0;-0.77;-0.39;-0.15;0.05;0.21
Gm8764	-1.84864	TACAATGGCGCCCCTTTGGA;TATAGGCCAGCTTTCACCCA;TTCATAGGGCGGCCATCCAA;CACTTAATACTCCAGAGCCA;CAAAACCACGTGGATACTGG;CAGCCTGTTCCTTCCACCAT;CCCAGTGCCTCGATTCACCC;TTGTCTATCAATCTGTGAGG;CTTCAGGGGTCAAAACCACG;ACGAAGTTTAGGGACAGCAC	-3.47;-2.35;-2.27;-2.2;-1.87;-1.65;-1.55;-1.25;-1.21;-0.65
Hsp90ab1	-1.37866	CCTCGGAGTCAACCACACCG;CATTAGAGATCAACTCGCGG;TGAAGATGTGGGATCCGATG;AGGTCGAAGGGAGCCCGCCG	-2.44;-1.87;-1.7;0.5
Gucy1a2	-0.292073	TGAAACTACTCAGATCACAA;AACTAAAATTACATCTCGGG;TCGTAGCAAGACTCTATCAA;AGAGTCATGTGTATCGTCTG	-1.67;-0.47;-0.13;1.1
Pdcl	-0.188055	ACCTCCAGGAGAAAATCAGT;TTTATGAAGATGGCGTCCCA;GCAGGTGTGGAACTAATGGC;CAAAAGGTGTGATCAATGAC	-1.25;-0.02;0.05;0.46
Gm2696	-1.22199	GCAGTCATCCACCTGCCAGG;GGGATTGACAGCATGAGGAT;GGGGAGCATGTGCAGCAAGC;TCGAACCAACTCCTCCTGGC;GCTGGATACACAGCTCACTG	-2.0;-1.55;-1.17;-0.74;-0.65
Tac1	-0.632931	CCAATAATTTAGATCATCGT;ATTAATCCAAAGAACTGCTG;AACGAGAAAAAAGACCGCCA;CTTTGGATTAATGGGCAAGC	-1.56;-1.46;-0.09;0.58
Tac2	0.211586	GCAATCCTTCCAGAGAGACA;GTGCTGAGCAAGGCTAGCGT;AGTCTCCGAAGCAGGGACGG;CAGCTTGGCTTGGACCTTCG	-0.78;0.41;0.49;0.73
Tac4	0.445964	GAAGCTTAAGTTCAATGCTG;TGGCCCGATCAGGAGAAGCA;GCCAGTTCTATGGTCTGATG;TCAGCTGGGACGTATAGTGC	0.21;0.23;0.49;0.86
Rhobtb2	0.498883	TGGATAACTCCATTCAGCCG;CAGTACCCCTACCTAGCCAG;TCTTACGGGGTAATGGAACA;GCCACCGCCCCCCATCATCG	-0.22;0.31;0.87;1.04
Rhobtb3	0.287571	ACCTCCCGAAACCTAATTGG;CTCAGTTCCGGTAATCATTG;GATACTGGAATCCTGAATGT;ACACCTGGCTGTTCAAGCTG	-0.25;-0.02;0.64;0.78
Rhobtb1	0.082901	GGTTCGCGATGCTAAAGCAG;CCTCAGCTTACCTTGCTAAG;AAGAGGACGTCGGCGCACAG;GGGTCAACCCCATTTCCAAG	-0.84;-0.14;0.57;0.74
Gm32940	0.370382	AAGACGATGACATCACAACG	0.37
Tbck	0.0905109	ACTTATGAGAGGTTTAACCT;AGATATAGACAATGATTACC;TCTTAGAAGGATGGAAGGTG;GAGACCATACATCTGATTTG	-0.47;0.24;0.29;0.3
Tbcd	-2.64487	TACAGCTCACTCACTCGCGA;CTACCATCCAGACTCTCAGA;CCTGTGAACATATCTAACAC;CTTCTGGTCACTCTTACCCG	-3.64;-3.52;-2.96;-0.47
Tbcc	-1.90923	AACTGCACTGTCAAACTGTG;TCCTCGCCGCCTACGACCTG;CACCAGGCTCAGGTCCCGCG;TTCTCCACCGGTGACCAAGG	-2.93;-1.82;-1.74;-1.14
Tbcb	-2.1033	CATCCTCATACTCTCCGAGC;CCATCGCAGAGTTCAAGGTG;GCCCGTACAATGAAGAACTC;TCTCACCAGAAGCTTACGAA	-3.53;-2.76;-1.72;-0.4
Tbca	-3.11534	TCAAGACCGGAGTAGTGAGG;ATGCAGCCTCTAACCGACGC;ACTCTTGCAGGATCTCTGCC;GCAATCTGGGATCATCATCC	-3.7;-3.17;-2.88;-2.71
Tmem44	0.227643	TGTCACACAGACTCGTTAGG;TCATGAAATCGACAGCTGCT;AGTCTCACGATATTGGAGAA;GTCATGAGCCACGATGGCCG	-0.45;-0.45;0.6;1.21
Tmem47	0.160595	CAATCTGTGTGGGATCACGA;GAATGATGGCAGCACCGCCC;GCGCTCACCGCTGCCGAGAG;CATGGAAGAGGTGCGAGTGT	-1.34;0.26;0.79;0.92
Tmem40	0.358374	TCCCAGTCTCAAGACAGTGG;CCACCCAGGTGCCGACCATG;AAGAATGTTTGCTATACCTG;GTTCAGTCTTCTTAACTGAG	-0.15;0.49;0.52;0.57
Tmem43	-0.24828	GCATGTGGAGATGTACCAGT;TGTGGTAGAAAAAGTCTCCG;AAGACTGGTACACATAATCG;CAGCCACATCGCTTGCAGAG	-1.14;-0.08;-0.02;0.24
Tmem42	-0.106963	TTACCCGCTCGCCTACAGAA;CAAGCGCCAATTCTCTGATG;GTTCAACTGTCTGTGCGCCG;AGGGTAAGCGGCCGCAGACA	-1.43;0.17;0.39;0.45
Rab40c	0.061695	ATCTTCAGGTCCTACTCAAG;TCTCCCGTATCGTGCTCATG;CGTACGCCTACAGCAACGGT;TGTACGACATCACCAACCGT	-0.51;-0.24;0.48;0.51
Rab40b	0.0498617	CGAGTCTCCTTACGGCCACC;CATCCTGCTAGATGGCCGAA;ATATTCCGCTCATACTCCAG;CATGCTCTAGCATGCCCCTG	-0.29;-0.13;0.02;0.6
Lacc1	-0.286928	TGGATTTACCACACGGACAG;GGGATCGTCACAAATCAGAG;ACTTGGCCTTGGGAGCGTGG;CGTTGGTCAACTCTTCACCG	-0.69;-0.48;-0.09;0.12
Olfr889	-0.525492	AAGTACCTACATCAATGAGC;AAAACCCACCAGCATTCTGG;CATACACTCTGCATGAGAGA;AATTATGTGGCCTTCACAGA;TCTGCCTCTTGATGACAGTG	-1.58;-0.87;-0.29;-0.24;0.34
Gm42573	-3.69101	ATGCCCCATAAGTGCTACCA;ATTCGCATGTATGTGGCCAA	-3.74;-3.64
Tcl1	0.709956	CTTACGAGCTGCCTTTAATG;GGCTACCCAGCGGGCACACA;GGGGGACATAGCTTCCCCCA;GTTGGTACCTTGATGACTAC	-0.07;0.47;1.2;1.24
Scx	-0.00432635	CAGGTGAGAAATGTAGCTGG;CACACGGCAGGGTTTCTCGT;GGGTCCTGGCCCGCTACCCG;GGGTACAGGTAGCGACCCGG	-0.65;-0.31;0.42;0.52
Sct	-0.217997	AAATATCCCAGAGAACAGCC;AGGACCAGCTCTGCTTGCTG;CATTCCGTCTGAGTGTCTTG;CAACAGCAGTAGCATCGGCG	-1.52;0.07;0.07;0.51
Arl2bp	-0.101581	TTCAATGTACTTCTCTACCA;CTTCATGGACAAGTACTACC;AAATTCTGCATCAGAGGCGG;TCACTGCAGCGTGGTTGTGA	-1.22;0.08;0.26;0.47
Meak7	0.403724	ACGGATCAAAGGATGAACCC;CATGGCCTGCATACTGTCAG;CTGCGACCAAGCCATGATCG;CCAACAGAGCCATGTCAAGG	-0.27;-0.13;0.22;1.79
Rtbdn	-0.0571236	CCACCAAGAAGATCCAAGCC;TGGGTATGATGGTAGAACCG;GTGGGTGGAAGCGATCGCGA;GAGCCTTCTAGAGAGCTGCG	-0.54;-0.0;0.1;0.21
Cytl1	0.56972	GGCGCGGACTGTACTGCCAG;TCCCGCAGGATTCCTGTGTG;AGCCACGAAGTCTCTCAGCT;CAGCATCCGAGAGTAGCAGG	0.36;0.42;0.45;1.05
Tecrl	0.405886	GTACAAGTTGTGACAAAGAG;GTTGTAGGCCAATTCGAGAA;AAGAAAACAAATATGTATTG;ACTTGGGTCAGCAAGTCGGG	-0.47;0.2;0.66;1.24
Rpl8	-3.47734	TAGGACATCATTCATGACCC;CAACACACGATCGTACCCTC;GACTGTGGCGTAGTTCCCGG;GCGCACGTGAAGCACCGTAA	-3.92;-3.66;-3.27;-3.07
Rpl9	-2.98565	AGGGCTTCCGATACAAGATG;ACTGCAGATGGTCCTGACGG;CTGTCCTCATCCGAACCCTG;GGACTTCAATCACATCAACG	-3.45;-3.03;-2.79;-2.68
Rpl6	-2.86495	ATCCTCACTGGGCGCCACAG;ACAGGGTTTCGGCTGCAATG;GTTGGTGGGGACAAGAACGG;TTCCGAGGAACATCTTCGGT	-3.46;-3.18;-2.47;-2.35
Rpl7	-3.09807	CCTTTGTCATCAGAATTCGA;TGGAGCCATACATTGCATGG;GAAGGCAAAGCACTATCACA;TTAAGAAAAAGGTTCCTGCT	-3.9;-3.26;-2.65;-2.59
Rpl4	-2.74644	AGAAAACAGATGTGTCGTGG;GCAAAATGAGAAACCGACGG;GCTGTATGGCACTTGGCGGA;GTTAGGTCATCGTATTGAGG	-3.06;-2.94;-2.77;-2.21
Rpl5	-3.17214	ATACTATCTATTACCTATGA;TGCATATGCCCGTATAGAAG;ATATTATATACATACCCTGC;GTGAGATTTCGAAGGCGGCG	-3.31;-3.3;-3.17;-2.91
Rpl3	-2.89791	CAGAGAAGGCAACACGGGCA;TTAGGTGCTTACCTGAGTGT;TGTGGAAACTCCCCCAATGG;AAGCGCAGCAGCCGGCATCG	-3.34;-3.31;-2.58;-2.36
Gm10231	0.0607983	TGGCGCTGGTTTGGAAACTG;TTCAACTCCACTGCAGACAG	-0.28;0.4
Mecr	-2.01329	ATCCAGAATGCATCCAACAG;AGCACTGATTGGAATCCCTA;AAGGATCTGACGTCCACGTG;CGTGGCGGTACCAAGCCTCG	-3.08;-1.86;-1.77;-1.34
Gm10233	-3.80439	TGTCATGCAACATCCTCCAA	-3.8
Cntn2	-0.243736	CTCACCACCACACCCCCAGG;GACCCCGTGAAAACCCACGA;TGTGAATATCGAGGGCAACG;AAGGGCCGTGACACCGTCCA	-1.47;-0.18;-0.09;0.77
Cntn3	-0.796884	AACATTCAATTGAAACACAG;CGCACCTGTCACAACCAAGT;TGTCGTGGAGTTAAACCCAT;CATCGTTACAAACTGAATGG	-1.83;-0.85;-0.41;-0.1
Cntn1	-0.0634616	TACCCTTCAGTATCACAAAG;GATCGGTACAGTATGGTCGG;TGAAGGACCACACAAACGTG;GTGCACGGCGCAGACAATCG	-0.65;-0.37;0.27;0.5
Cntn6	-0.199765	AATCCCCAAGTTCCAACAAG;GTGCGCAGCACTAAAGGCGT;TGGTGGGGTCATGAGACACT;TATCACTATAGGTTGGATGG	-0.75;-0.21;-0.12;0.28
Cntn4	-0.00981601	TCTCTTGAGAAACGAAGCGG;AGCTAGGACTCCATTCTCCG;GATAGAATACAAATCGAGCA;TGCCGGTTCATATGAATGTG	-0.55;-0.13;-0.06;0.7
Cntn5	0.0134064	CTCCCCATGTACCGTACCTG;TATCGCTACAGTCTGATAGA;AAAGTGCAAACATCCGATGT;GGAGTGATAAAGGTTGCCTG	-0.16;-0.13;0.09;0.25
Gm46193	-3.56665	AGATAGCTGCATCATCAGCA	-3.57
Espl1	-2.60128	ACAGATGTAAAGCCATAACA;CAAAGTGAGGGACCTCACAG;GTAGTCCAGAAAGGGCGACT;CTGTCGTACAATGCCCGGAG	-3.13;-2.79;-2.43;-2.05
Fhod1	-0.0799623	ATCTCCATCCTCTAACCGAA;TTGACTGCCTGGATGAACAG;GACGGCCCCACGGAAATGGT;TGGGTCCGCAGGATTAACGT	-2.16;-0.08;0.6;1.32
Nat9	-0.33427	TTCTGGAACATCCGGATGCT;TCTCTCCTGATCATGTCCTA;TCCTAGAGCCTAGCTACAGG;ACCCCTGCAGATACCACGAG	-0.55;-0.54;-0.17;-0.08
Nat8	-0.0108325	AACCTGAGCCACGGACACTC;CAGACACCAGGACTATGGCA;TTGGACACATAATTCTTCCA;AGCTGCTTCCTCCCTAACGG	-0.84;0.08;0.12;0.6
Olfr1459	-0.269095	CTCTTCAACAATCACTCCAA;AACCACATTAGACTCACAGA;AACATGTCTATCAGAGCAAG;GAATCAATAGGATCAGTCCC	-1.49;-0.26;0.13;0.55
Cass4	0.276218	CTCTTACAGATTCCTCTACG;GACCTGTGTATGAACCAATG;AACGCCCCTAAAGCCATGCA;GGAAGGAAGTGTCGGCAACG	-0.33;0.19;0.53;0.72
Nat3	-0.267893	AACACATCCTCCTAACATTG;CATCCATTGTGGGAAAACCA;TGAGAGAAGAGAATGGAACC;CTACTACAGGTGACCATCAG	-1.33;-0.98;0.4;0.83
Olfr1454	-0.576124	AGAGTAACAGAAGTCCACCA;GAAAAAATGATGGACTACAT;CATAGGCCATTGAGACCAAA;ATGGTGGTAGCATAATGTAG;ATGTGTGTGTGTCTACTCAT	-1.23;-0.86;-0.81;-0.56;0.58
Nat1	-0.300203	AACATATCCTCCCAACATTG;ATTGTGGATTCCGCCTATGG;GAGAATCTTAACATGCATTG;TGGTCACCTGTACTAGAAGG	-1.57;-0.17;0.1;0.44
Dnmt1	-2.98175	TAATGTGAACCGGTTCACAG;CATCACGGCTCACTTCACGA;CAGAGCCCTATCGCATCGGT;ACCTCGGGCCAATCAATCAG	-3.64;-3.49;-2.81;-1.99
Olfr1451	-0.48746	CATTAGATTTACAAAAAGAG;CATCCTGGTAGAGTAATGCA;AAGAACTCAGAAATGACCAT;TTGATGTGGTTGGAAACACG	-1.62;-0.25;-0.04;-0.04
Olfr1450	-0.425758	ATTTGTATATATATCAGAGC;CAAAAGCCATAACAGCAAGT;TGATGGTTGGGCTTCTCACA;AGATTGAATATGATGAACAG	-1.03;-0.41;-0.14;-0.12
Olfr1453	-0.636807	TTCTTCAACAGTAACTCCAA;AAGATACAATCATTACTGCA;ATGGTGGTAGCATAATGTAG;TAGTATAGATGGAAGCACTG	-1.68;-0.6;-0.56;0.29
Zfp13	0.0520699	CCAGGTAATGTGCAACACTG;CTTGGCCGTCGCAACCCTAG;GACTCCTGTACTGTCCCGAG;GCTGAAGCTCTTCCAACACG	-0.86;-0.26;0.66;0.67
Pomt1	0.235751	TGTGAACAGAGAGTCCAACC;GTCCACGCGTGGAATCTGAT;GGGGCACTCACGTGTTAAGG;ATAGTCGGGTAAGTAGTCCC	-0.59;0.21;0.41;0.91
Gm2959	-2.02989	TGAATTCAGTGTTCATCCTG;TCAGGAAGATAAATGCTGAG;ATCAAGGAGAGACAAGACCA	-3.29;-1.41;-1.39
Sdr39u1	-0.032832	TGGCCCGGGTCGAATCACGT;GTGACTAGAATCCAAGCCTG;GGCCCTGTTGACCTTCGCAG;GCAAGTGGGTAGTATCCAAG	-0.24;-0.05;0.05;0.1
Gm46683	-2.3052	CAATCCCATCATATTTAACC;GAGATGAGTCTATCACACAG;AAAAGTTATCGCCAAGAGGG;ATCATATTTAACCAGGTACA	-3.04;-2.85;-2.01;-1.32
Gm46682	-2.40424	CAATCCCATCATATTTAACC;GAGATGAGTCTATCACACAG;ATCATATTTAACCAGGTACA	-3.04;-2.85;-1.32
Gm46681	-2.45365	CCTGCCCAAAAGGAACATCG;GAGATGAGTCTATCACACAG;ATCATATTTAACCAGGTACA	-3.19;-2.85;-1.32
Fat3	0.00110556	GTGACAATCAGACCTGACCG;ACGAGACAATCATAATGGAG;CAAAGTAACCGAGATTGTAG;ACTTCTGGTGTATCAGATTG	-0.37;-0.27;0.04;0.6
Fat2	-0.289833	CTCAACTAAGACTTCCACTG;TGACCCTCACCAATGCTACG;CTACTCAGTAGACTCGACCG;GTGTCCGGCTACACATCGAG	-0.81;-0.63;-0.16;0.44
Fat1	0.0563921	TCCGTCGCTCGAATCACCAG;ACGGTCAAACGGTATCCCGG;ACGACCTCGGTATACCCCAG;GTGCGCGCCCATCATAACCG	-0.63;-0.06;0.34;0.57
Fat4	-0.0348774	GACATCGTGGACGATCGAGG;CAGTTATCTCATCACTACCG;ATTAGATCCTATGTCCGCGT;GGGATGTCGAAAGAGTACAC	-0.41;-0.39;0.22;0.44
Tspan2	-0.442816	TGTACAGAGCATGTATGAGG;CACACACTGTGACTCACGCA;TCGATTTGGAGGTACCATGA;TACCTTAAAGACAGGGCAAG	-1.02;-0.65;-0.5;0.39
Tspan3	-0.445888	AATTCATAACTATTCAGACT;TCTGCACATAGTCAATAGCA;TCCTACAGCTATGATCACCA;TTACCGTGGCAAGTCCACAG	-1.29;-1.05;-0.25;0.82
Tspan1	0.233273	GCCATGCAGTTTGTCAACGT;TGGTGTACACCACATTGGTG;CAGGAAAGATGTCCCATCGA;GAACAAGTGTGTGCTCATGA	-0.28;0.16;0.21;0.84
Tspan6	-0.41507	AATGAGCACAAAAGGCACAT;TCTGAAAACAAATCCAACAA;TTCACTTCTATAGTCTCCTG;CCCAAATGCCAACGGCAAGA	-1.05;-0.97;-0.13;0.49
Tspan7	0.217517	TCTCCTTTCGCAGATCACTG;TCAGCATCCATGGACTACCA;TGGAACCGGCACCACCATCG;ATCCGTGTAAGTCCTCAGGA	-0.58;0.1;0.51;0.83
Tspan4	0.23014	GGTGGCAAAGTTTCCCTGTG;CTGCCGTGGTCCTAGCTGGG;AATTGGAAACTCCACAGCAT;GTATGGCACACAGGGCAACG	-0.13;0.23;0.29;0.53
Tspan5	-0.492869	CCAGGAAGAAAATAATCCCC;GTTTCTTGGAATCGGACTGT;ATCTCGTCCATCACCGACCT;ATTCCTGGGTGAAGTCTATG	-1.08;-0.52;-0.3;-0.07
Tspan8	-0.68069	TGAGGCAAAAGACTTCCAGA;AGATATTCACAGCAATGAAG;ACGTACCTCAGGTTTGAAAG;GTATGTGGTACACTGATCTT	-1.52;-1.49;-0.04;0.33
Tspan9	0.609479	ACAACACAGAGAACAACGTG;CTTCTTCGTCTACATGGACA;GAAGCCCGTCACCATGACGA;CCCACAGATGCGGTGTTGTG	0.13;0.64;0.68;0.98
Ccin	0.501679	CCACGGTAAGTTCAACGATG;GGTGATGTAGAGTTCATCGG;ACTTTCGATCAAGGTCGCGT;GGCGACCGAAGATGACGGGT	0.27;0.42;0.64;0.68
Prm3	0.324314	AAAGTTGTCTTGACTCACAC;TTCCCTGTCATCAGAGGGCG;GCTTCTTCATGGAGGACTCG;CATGGCCCAGCCCAGAACAC	-1.31;0.8;0.86;0.95
Prm2	0.145344	GACTATGGGAGGACACACAG;TGGACAAGACCATGAACGCG;GCTGAGCCCAGAGCGCGTAG;ATAGGATCCACAAGAGGCGT	-0.55;-0.13;0.45;0.81
Gm14440	-2.89043	GAACTTCACTCAGGAAGAGT;GTTCACATGCACGTCATCAT;GAGTCTCTACAAAGGTGTGA;GTGTGATGGTAGAGACCTAT	-3.31;-3.04;-2.66;-2.55
Gm15319	-2.71638	CGTATTGCTCACCCACAATG;CCACATGATGTTGACTGGAG;TTCCACCATGCTATATCCAG;TCATAGCCAATCAAGTAGAG;TACCCCTGGATATAGCATGG;TATAGGCCCATTACAACGAG;ATGTGGATGAATCTGATAGG;GACGCTGGTACACTCACCTG;GACCCAGACATGAACGCCAC;ATTACAACGAGCGGCCAGCG;ATCATGTGGATGAATCTGAT	-3.6;-3.38;-3.16;-3.05;-2.76;-2.76;-2.75;-2.37;-2.22;-1.98;-1.86
Gm15310	-2.00739	ATCTCCCGAAGAACTTATCG	-2.01
Gm15312	-3.45205	ATTCGCATGTATGTGGCCAA;GGGCATCATTGTCAACAAGC	-3.64;-3.27
Wdr86	0.549355	GTGTCAGTACACAGTTACGG;CAGATGACACAGCCAAAGTG;GATGTCCCAAGCGCGAACGG;GTGCTGACTGCACCATCCGG	0.24;0.26;0.72;0.98
Pcp4l1	-0.162895	CAACTGTCTATAGGGAAGCC;GAAGCCTGGCAGCATCAAGA;CAACCAGGCATCTGACCCTG;AACACCTCCAGCAGCCAACC	-1.01;-0.48;0.4;0.43
Wdr81	0.162507	CCGGCCTATACTCAAACAGT;ATGGTGGCAGGATACTCGTG;TGTAAGGCTGTCCATAAGTG;CAAGAACAGCGTCAAGTCAG	-0.62;0.2;0.35;0.71
Wdr82	-3.22094	TTACCTTATCAAAAGAACGA;AGTATGATAGGACCTGTGAG;TAGGGCCTCATGCATCTACA;ACTTTCCTGGACACAGCAAG	-3.5;-3.32;-3.26;-2.8
Wdr83	-1.78836	CGGCTACGAAGTGCTAGATG;GGCAACTACTGCCTGACGTG;TTAGGTCATAGCGCCTCACG;CAGGTCGTGCGCAAATTTCG	-2.45;-2.26;-1.56;-0.88
4930579G24Rik	0.553266	GAGCAAGTGGAGCTGCAGAT;CAGGAGTCCCGGTCCAACCG;CATGCTGAGGGACGACGAAG;TTGAGCTGATACCGCAGACG	0.26;0.45;0.71;0.79
Wdr89	-0.31157	CATCTGCTACGAGAATTTGG;TTGACGTGTCTATGCCAAGC;CTGTCGACGAGAGACCCACT;GTGAAGTGTTGGGACGCTCG	-1.14;-0.6;0.23;0.27
Msmo1	-0.48823	GATAAACCAGAAACCTTCGA;TAGTATGTTCCACAAATCAG;AAAGTTCCAGATCGCAACCT;ACAGGTACTTAACTTTGGCA	-1.19;-0.61;-0.19;0.04
Pitpna	-0.801076	ACAAGATCTACCACTTACAG;TGGTCTTGTAGTATCAAGTG;AAATCTGTCAAAACAGGACG;GAGCCCTACGAGAAGGACGA	-2.36;-0.62;-0.46;0.23
Pitpnb	0.458429	TGACTGAATGGAATAATGCA;GCTACTCACCGTTACAACTG;ACCTTCCAGTTAGGTCCCAG;ACACATCCTAGGACAGTCAG	-0.32;-0.05;1.03;1.18
Gamt	0.501099	CTATATGCATGCGCTAGCGG;GATTATTGAGTGCAATGATG;AGACGCGTCATAGGCCGCGG;ATCAAAGTGACCGTCAGGCA	0.31;0.5;0.58;0.61
Cfap126	0.124247	GTCTGACTGTCAGGATCGAA;AGATCATCGCCAACGATCGA;GCTCAGAATACCTCTTTCGT;TGTAGTTGTACGGGCGGTCA	-0.24;-0.13;0.21;0.66
Scpep1	-0.444957	CACAACAGATGCCTACGCAA;AAACTCCATACTTACCCACG;GGATTATGTGACTGTCCGAA;CAAGCCTCGAAATACTACCT	-1.74;-0.17;-0.02;0.14
Zfp628	-0.136486	CCACACACACTACATGAGTG;AGTGGACAGGCCTTTCGCTG;CAAAGCCACGGCCACAAATG;GGAGAACGCCCTTACACCTG	-0.77;-0.06;0.06;0.22
Zfp629	-0.073222	CACCGCGTGATCCACGAGAG;CCAGAGGACACATTTGCGCG;AGCTGCGGTAGAAAGCACGT;TGTGAGACCAATTGGCAGTG	-0.31;-0.2;0.08;0.14
Zfp626	-3.34945	CCACACTGTTTACATTCATA	-3.35
Rab5if	-0.145664	ATTCCCAAGAAGCCTCGCAA;AAACCAGAGCGATGATCTGT;GGGCCCTCAAGGTGTCCGTG;AGGGCCCCGTTGGCCAGCTG	-1.21;-0.04;0.28;0.38
Zfp623	-0.169352	GCATCAGATCTCGCACACGG;GGTGCTCGATGAGGTCCGAG;AGTGAAGCCCCCGTCCTGAG;TCAGAGAGAACTCATAGATG	-2.16;-0.08;0.52;1.06
Mbtps1	-2.90637	TGACTGAGTGTCCCTACATG;ATGGCAAGGTAACCTGACCA;TGTTTATAGGAATTACCAGG;GAACGAAAGACTTTCCGCTG	-3.58;-2.8;-2.76;-2.49
Lrit2	-0.0777295	GATACCTTCTGCAATTGGCG;CCTTATTTGAACTTTCCCAG;GATAGTGACATTGACACTAG;GAATTCACCAGTATGAAAGG	-0.6;-0.16;-0.0;0.45
Lrit3	-0.027105	CAGCTCTCTATACATCTACG;GTAGCTGACATCATCACGGA;CTGACGTGGACCAGATCCGA;TGTGACAGTCACAGAACCAG	-0.22;-0.06;-0.0;0.17
Lrit1	-0.133532	TTCAAACCTGATCTTCATCG;AGACTTCTACCGGATACAGT;AGCACAGTATTGCTACGTTG;CTGGAGGCAGAGTCAAGTCA	-1.17;-0.96;0.35;1.24
Plcl2	0.0609914	ACAGATATATTCCGCAGCAA;GTATACGACATCACCCAACA;CTGATGATGGACCTAAACGT;GGAGCGTTGAATTAGATGTG	-0.92;-0.13;-0.03;1.33
Plcl1	0.283119	GGCCGGCCTCGCTATCCGCG;AGGATGTCAGGGGATTACAA;CAAAGAAAAACTAACTACCC;GTTGCTTACTACGAGAGACC	-0.0;0.0;0.51;0.63
Sall1	0.128346	TGGAGGCAATGGTAGGCCGA;TAGAGAGGTTGTGATCGCTG;GCGATGCTCGACATCTCGAG;AGCCAATCTGCCAACATCAG	-0.36;0.11;0.15;0.61
Sall3	-0.156447	CAGACCCTGAAGCTGTACTG;GTGGAGGTATCTACGGACAA;TGCTTCATCAGAGCCGACAG;GCTGACCGGAGTGATGCTAG	-0.91;-0.27;-0.15;0.7
Sall2	-0.170736	CCCGAAGACAGATCACACAC;TGTTGAACGCAAACCCCTAG;GGTAACCGTTTCACAACTCG;CAATTATCACCATTACCGGT	-0.79;-0.42;0.14;0.38
Calhm4	0.135591	GCTATCAAAGAATTGATGCA;ATGCTCTACGAGGCCAAATG;CATCGGGTATTGGTCCACAG;TCTTATTGGAATCACATCAG	-0.62;0.16;0.48;0.52
Rap2b	-0.551657	CTTGCGGTAAAAGTCCTCGA;GATCCTGGTAGGCAACAAGG;GGAACCTGTTACGAACTGCA;CGGAGCAGTTCGCCTCAATG	-1.11;-0.83;-0.63;0.37
Rap2c	0.206842	GATTAACCAAACTATACACC;GTAGTGGTGTTAGGGAGCGG;CAGGATTTCCAGTACTGACG;GAAAGTCCCACTCATCCTAG	-1.36;0.42;0.77;1.0
Rap2a	-0.258061	CATCCTGGTCGGGAACAAAG;TCCAAGACATCAAGCCCATG;GAAATACGACCCCACCATCG;CCGAGCAGTTCGCGTCCATG	-1.56;0.01;0.02;0.5
Mybph	-0.125281	AGCTTACTGCAGTCACACGC;CTCCAAGGTCAGCCGCAGTG;GAGAGTTAATGTGCGCAGCG;GGCGGATGTAGGTCTGACGA	-0.82;-0.31;-0.16;0.79
Calhm2	0.42442	TCCATACAGGTAGTTCCGGG;TAGTCGCCGAGTGCCAGTAC;CAACCTATCGAGCTTCCGAG;CCCCCCAGCCCATGCTACGG	-0.27;0.35;0.39;1.22
Pdxp	0.299168	TGTTCGTGAGCAACAACAGC;CTCGTCGTAGCCTACGAGCA;CGGGTGCCAAGGGTCGCGAT;TCGACTGCGACGGAGTGCTG	-0.7;0.49;0.63;0.78
Ache	0.412152	CAGCAGACCTACATTGCCAG;CAGTATGTGCATGCCCACGG;AAATGTCTGCTACCAGTACG;GACCCCGTAAACCAGAAAGT	-0.46;-0.29;0.86;1.54
Gabpa	-0.872671	TCTTCCCGAAATGTTGAGTG;CTGGCTTACACATTCAGCTG;TCTTGAAATTGTTAAGACTG;TTTAATCGTAGTCGGTGTAG	-2.41;-1.54;0.13;0.34
Rdm1	-0.125478	TCGTCTTGGAACCAGACACA;TTGATGATGGCGTAGAAACC;GCTTCAGTGGATGGTCGAAA;CAGGGCTCCTGCATCCGTAG	-0.47;-0.13;-0.03;0.12
Iqschfp	-0.460069	CCTTTAGAACAAGTTGACGA;GCTGCTTACAAGATCAGCGA;CATTGACAAAGCATATCTGG;GCCACGTGGACTTACCATGG;TTCGGATAGAGACACAACTG;AATGTTATTCTCCACATCCA;CATGGCGAGAGTACTTGCAG;TTCCAAGGGCTGTAGGCTGA	-2.06;-1.32;-0.64;-0.4;-0.18;-0.04;0.46;0.51
Gm4691	-2.79606	GGCCGGTGCTGAGTATGTCG	-2.8
LOC673652	-3.48303	TGGAGCGCACAAATACGTAG	-3.48
Adcyap1	-0.00416727	GCTGCAAGACTTCTATGACT;TTACGCCCTTTACTATCCAG;AGAAGACGAGGCTTACGACC;GGCGTAAGCGTCACGCAGCG	-0.48;-0.16;0.24;0.37
Pdx1	-0.53097	GACCCGTACTGCCTACACCC;AATCCACCAAAGCTCACGCG;ACTGCCAGCTCCACCCGGCG;CCATTCGGGAAAGGTCCGGG	-1.62;-0.35;-0.26;0.1
Cyfip1	-1.1369	AAACGCGCTGTGTAATCAGA;GAACTTGGTGAGCGCATAGT;GCAGATGATCCAGATCCGTG;TTCAGAGAAATGCCATCGAG	-1.74;-1.15;-1.02;-0.63
Cyfip2	-0.150791	CAATGACCCATGCTTAAGAG;ACAGCATGACTGCATAGTCG;GCGCTACAATTATACCAGCG;AGCTGAGTGTAAGAACTATG	-1.22;-0.09;0.32;0.39
Stum	0.398278	TCTCCCAGGTACATTCGTCT;GCACAAAGACGCCGAGACCG;AGCCACCGGGAAGGGCATGT;AGCACACGTGCCTGTCCGGG	-0.39;0.37;0.66;0.96
Fgl1	-0.00397411	TTGTGACATGTCTGATGGAG;TCGAGAGTGAGAACTGCTTG;GGAGGCAAGAAGCAGTATGC;GGTCTGTTGTTGTTTGACCC	-0.23;-0.2;0.17;0.24
Abo	-0.738485	CTGTGCGCAACTATACTCGA;ACTAAGACAAACACTGCGAA;AGAGCGACGCTTTCTACGTG;TGCAGAACAACACTTCATGG	-1.44;-1.43;-0.27;0.18
Abr	-0.312107	GATACACAATCGGAATGGAA;TTTGCTGACAAAATAGCCAA;GACACTCACGTGAAGGACCA;GGTTGTCGTAGAACTCCTTG	-2.08;-0.31;0.39;0.75
Mmp1a	-0.260618	TAATGTTCCCCAGTTACACG;CAACGGAGACCGGCAAAATG;GAACATCACCCCCCAAACCT;AGATCACCATTACATGGATG	-1.37;-0.34;0.27;0.39
Mmp1b	-0.307665	TTACTCACAACAATCCTCGT;GATGCTATAATTACATATCG;GAAGTGGACCGACAACAATG;CAAATGTGTAGAGGTCACCA	-1.61;-0.53;-0.39;1.3
Kctd20	0.117937	GCATTATGTGAGGATGCGGA;GCAGTTTGACCACTACCTCG;ACTCACTCAGATCCTGACAT;GGGGGAGTATGTGATCGCGG	-0.35;-0.01;0.24;0.59
Kctd21	0.464459	GCTATATCCTCAACTTCCTG;AGAGGTAGAACTCTCCAAGG;GGTCAATGAAGCAGTTACCC;AGACGGTCCACTTCACCGTG	-0.16;0.07;0.37;1.57
Hsbp1l1	0.592954	AGAGATGGGAAGTCGCATCG;GGCTGAGAATCTACTTCTAG;CGGACGCCGGAAGTTCCCTG;GTGGATGGACACCCGGACGC	0.15;0.39;0.82;1.01
Gm3476	-1.94531	AGTGCCAAGGAGCAGCAGGT;GGAAGAAAAGAGGTTCTGTG;GAAGGAAATCATTCTGGAGA;TGCTTCCATGAAGTTCTCTG;CATCTGTGCCTCAAGTGCCA;GAGAACTGAAATTGCATATG;AGAGACCAGACCAATGGAGA;ACAACATGAGAAGATAATGT	-3.45;-2.99;-2.95;-2.06;-1.3;-1.21;-0.86;-0.75
Cela1	0.0368252	CTGCACGTTCACATACTGCT;CAACCACTCGATAAGTCATG;GATGTCCCATTCAGCCAATG;TCCGGAAACTGACGCCCGCG	-0.64;-0.1;0.14;0.75
Mmp14	-0.45326	CCATCAATACTGCCTACGAG;TTGCCTGATGACGATCGCCG;AGTGCCCTATGCCTACATCC;TGACGGGAACTTTGACACCG	-1.25;-0.45;-0.21;0.11
Mmp15	0.386551	AGACGCCGAAGTGTACGCCG;TGGGGTAGTTGTCTAGAACG;AGGGTGCCATAATAGCGCTG;AAGCCAACCTGCGTCGACGG	-0.22;0.16;0.44;1.17
Mmp16	-0.437771	TTCCATGTACTGATAAAATG;GGTGTACCAGACCAGACAAG;GGAGCAGTATTTCAATGTGG;ATGACAGGCCCAAACCTCCT	-1.88;-0.31;0.22;0.22
Mmp17	0.03289	AGGCTGAGGTCCTCCGCGCG;GCTGCAGCGACACCAAGTGT;ATCATGCAACCGTACTACCA;GTGCTAGACCGATTGTTGGG	-0.19;-0.16;0.07;0.41
Mmp10	-0.397247	AGACAACACAGGAACCACTG;ATTTGTTTACCATCAGAACA;TTCAGTCAGCACGCTGAGAG;GTCGGAATGAAAGAGACCCA	-0.96;-0.53;-0.11;0.01
Mmp11	-0.00664948	ACTTTCACTGAGGTGCACGA;CTGTGAGACTTCCTTCGACG;TGATGAAACTTGGACTATTG;ACAGACCTCACCTATAGGTA	-0.82;-0.31;0.04;1.07
Mmp12	-0.385928	CAGGATCTATAATTACACTC;CAGAAAGCTTCATAAAGATG;CATCGGGCACTCCACATCGA;AGGTCCAGGATAAAAAGCAT	-2.01;-0.33;0.11;0.69
Mmp13	0.20966	TTCCCGCAAGAGTCGCAGGA;CCTAGGTCTGGATCACTCCA;AAGATGTGGAGTGCCTGATG;GATGCCATTACCAGTCTCCG	-0.22;-0.21;0.38;0.89
Gm9616	-2.96179	TGAGGACCAGTGGATGGACG;CGTCTGATCTATGACACCAA	-3.28;-2.65
Mmp19	0.0855795	TGGGCACTCCCGATATACCC;CTTTAAGTACTGGAGCAGCG;AAAGCATAAGTCTTCCCACG;AAATGAGTCCGTCGTGTCCG	-0.08;-0.07;0.09;0.4
Klrb1f	0.391064	CTAAGACACTGAGTCCAATC;GAAGATGCTTGCTTATACCC;AGAGCCAAATGATGCCAGTG;AATAAACATTTGTTCCAGTG	-0.11;-0.01;0.62;1.06
Klrb1a	-0.697568	AAAGCCACCCAGGACTCCAG;GTCTTGAATGAGCATCAAAG;AAAATAAAGTGACTGACCTG;CAATCAGGGTCACGACAAGG	-1.35;-1.05;-0.27;-0.13
Klrb1b	-1.04705	CAATCACGACCAGCACAAGA;ATCAGTACAAAAAATCTGCG;ATGCAGATTTAAACCTAGCC;AGAGCCAACCGATGCCAGCG	-2.33;-1.0;-0.75;-0.11
Klrb1c	-0.461491	TAAGACACTCATCCCAATCA;GAGATGCAACACTTAACTGG;AAAATAAAGTGACTGACCTG;TCCTGGGTGGCTTTAAACCG;GAGGAAGGTCAAGCTGACTG	-1.51;-0.88;-0.27;0.01;0.34
Gpsm2	-0.0383193	AGAACGTCTATGTAAATCAG;AAAGTGGTGAACTGACTGCG;AAGCAGTTTCGAATTCACCC;GTGCAAGAGTTAAGTCATGG	-0.77;-0.29;-0.02;0.94
Gpsm3	0.117796	CCGCCGCCTAGAGGAACAGA;TCTTTGTCTTCAAGAAGCCG;CCTCCTGGAACCCGACACAC;CCGAGCGGTGGCATTCACAG	-0.89;0.22;0.56;0.58
Gpsm1	0.546728	TGGAGAGACCCACCACACAG;GGTCCTAGGCCGATTCGATG;GAAGGAACTAGGCGACCGGG;CAATGACTAGGTGCCGCAGG	-0.15;0.23;0.82;1.29
Ppef2	0.0617907	CGGGTTTGCACTCATGCGAA;TCTTAACAGAGGAAACCATG;AGGTGCCAGACAGCTACACG;ACAGCAAGGAGCTATCCCGG	-0.43;0.06;0.25;0.37
Ppef1	0.0285653	CTCATGAGTGTAAACCCGAC;CGTCAAATTATGTTGAACCA;AAATCCTGGTCATACATGGT;GCGGTACAGAGCTCGACTGA	-0.6;0.15;0.27;0.3
Olfr635	-0.0691794	CTGACATCAGAGTCAACAGC;CCATGAAAGAGAACCCATGG;AGGGAATGGAGATCCAGAGA;GCGGATAACGGTTAGGATGG	-0.75;-0.39;0.14;0.73
Olfr633	-0.227672	ACATATACTATAGGCATCAT;AGGATGGCGGTGTATCGGAG;GGTACCATGCTTCCAGACCA;GCTGGTACCAGTCTTACACT	-0.98;-0.33;-0.09;0.5
Olfr632	0.683844	TGGTTTGATGCCCGGATGGT;GTGCCTATCAATGCCACACG;CAGTAGATGTAGTGAGGGTG;ATCAGCAGTGCTATTTGCTA	0.41;0.73;0.76;0.84
Olfr631	-0.238595	AACGATCAAAGGACATGACG;CCTATATGGACTGTCACTGG;CCTCTGAACGGTAATAATGG;CCAAAAAATACCCACCATGG	-1.01;-0.23;-0.11;0.4
Olfr630	-0.0219728	CCTGAAAAGTGACATCATGG;GCATGATCCTGCACATTGTG;TCATTCCTATTGTTTGCACC;GAGAATGGTAGCATATCGCA	-0.33;-0.02;-0.02;0.28
Olfr639	-0.422066	AGACCCATGGATATGATCCG;GCCATCAAAGTCAATTCTGT;CTAGGTTGAATAGCATCCTG;GTTGGATCAAGTCTGAGTGA	-1.11;-0.68;-0.28;0.38
Olfr638	0.0813929	CTGACATCAGAGTCAACAGA;TGTGCGGATGACAGTTAGGA;CCATGAATGAGAACCCATGG;TTTCCCGAATGTTGAACCAG	-0.13;-0.0;0.22;0.23
Oma1	0.271428	GACCAACTGGGTGGTTCATG;ACCTACAGATGTACTGTGCG;GTCCTGCCGTAATAGAGGCC;ACCTGCCCACGATGATAGCA	-0.15;0.13;0.52;0.58
Shroom3	0.72803	GTCTCGGCGACGAAACGACG;ACGGTCTATGATACCCGGAG;GGATATGGACTATGGCCGTG;ACGGTGCTCTCCGAGAAGCG	0.52;0.72;0.74;0.93
Bod1l	-1.52761	TCGTCAAAACACAAACACAA;TTCTGATGACGAACTCACAG;TGGTAAGCTGACTATCACTG;CAAGTCAATGAGTGTGACTG	-2.46;-1.57;-1.3;-0.79
Poteg	-0.216251	TGATATCGAACAAAAAACCA;AATGGGAGCAGACATACACG;ACCGTTGGGGCATATTCACA;TGGTAGCCGGCCATAGACAC	-1.75;-0.06;0.26;0.68
Tmem178b	0.352119	ATGCAGCCTTACCTCCCATG;CATTTCACTGTGCACATGTG;CCGAGGCCTTATGCAGTACG;GGAGTCCGTATAGGTAGCGT	0.1;0.2;0.42;0.68
4930433I11Rik	-0.554965	ATTCTACATCACTTGCACCC;AGTCAGGGTGTGATAAAGGA;CTGATCCCTCCAGACAACTG;TGCAGGTCTTCCATCCTCTG	-2.07;-0.47;-0.07;0.39
Crnn	-0.35691	TGCATATCTGACAAGTCTGA;TGTTGGATGAAGATAACACA;TCAGGACAGCTACCCTACAC;GTGGCTGCAAAGTACTCACG	-2.4;0.06;0.16;0.74
Vangl1	-0.912946	GAGAAAGACACAAATCACCA;CTTCATAATACAACTCGTTG;TGTCATCAGGATGACAACTG;GACAAGTAGTCCAAGGAACG	-1.66;-1.16;-0.65;-0.19
Vangl2	0.00607458	CTGGGGAGAAACAACAACGG;CCTCGTAGTAGTACTCATTG;GGTCGTGCGATCCACAGATG;GCTCGTAACACGAAGACTCG	-0.92;-0.19;0.49;0.65
Maea	0.034176	CAATGAACTCCTGAATCCTG;CATGAGCATTACCTTGTATG;GTGGAGCATCTGCTACGCTG;GCAGGAGTACCCGACCCTCA	-1.05;-0.07;0.39;0.87
Csl	0.393421	GTCCGTGTAGCCTAACATGT;GCTGAGGAATCTGATACCCA;TGATTTGCTAGCCCATGGAG;TTTGCCCGGGCATATGCGCA	0.03;0.42;0.52;0.6
Gm14164	0.223723	CCTTACCTTCCAACACAGTG;CTGTAGTCATGGCACCAGTG	-0.54;0.99
Sostdc1	-0.481813	TCCACCAAATACATTTCGGA;ACAGCACCCTGAATCAAGCC;CTTCCCAACTGGATCGGAGG;ATGTGAATAAAGGATTTCTG	-1.49;-0.85;-0.08;0.49
Kalrn	0.181262	CTCCACCGGAGAGACCACGG;ACAGAATACATACACCAATG;TCCTTATTGAGGATGCCGGG;GACAGAGAAGGACTACGTCA	-0.52;-0.01;0.14;1.11
Dmp1	-0.04637	CAGGTCGGAAGAATCTAAAG;TCAGGCAAATAGTGACCACA;AACCCAGAGCGACTCCACGG;GTGGACTCTCTAAGAGTACG	-0.36;-0.29;-0.13;0.58
Mael	-0.852492	TTAACACAGCCAATTTCACA;ATTACCTTGCAGTAAATAGG;AGATAAATTTGACATATCAG;GGGACTATTCTAGCAACACG	-1.31;-0.83;-0.66;-0.61
Gm4907	-0.0031323	TGTGGAGAAATACAAGAGTG;AGCCAGTGACAGGTTCAGAG;CATGTCGTAACTGCAAATGT;GATCGCCAAGCTGAAATCAG	-0.5;-0.13;0.05;0.57
Sin3b	-0.773681	ATGTCTATACGGTATCCAAG;TGAGGACCGACAGATCCTAG;ACTAAGGGCCGTCCATTCCG;CTCCAAGAAGACGCCCTACG	-1.25;-1.09;-1.03;0.28
Ercc6l	-1.06516	AGAACTGATAGCCTCTACCT;AAGACACCCAGCTCAGCTAG;TGGCCAAAAAGAGAATGTTG;GGGTCAACGAATTTGCCAAG	-1.53;-1.44;-1.17;-0.12
Sin3a	-2.06118	AGAACGACACTAAGGTCTTG;TATGCCTCTTGTAAACGACT;TAAAGCCCATGATCAGATCA;AACGTGGGGATGCATATGGT	-2.71;-2.45;-2.38;-0.7
Ddb2	-0.624335	CAAACCTATCTTCCTTAAAG;CTCAGGAGCAAAAGTCGCAG;CCCGACTCATCCCAGTACCC;GTGGTTACAGGAGACAATAT	-1.74;-0.68;-0.27;0.19
Dmpk	0.433115	CCAGGCGAATGTGCCCACAT;CGGGCGTGGGGCGTTCAGCG;GCTGAGATAAGGCTAGGTCG;AGAAGCGAGCCATCTCGGCG	-0.06;0.23;0.61;0.95
Stk39	-0.22522	TCTACACCAGTTTCTAAAGT;AAGAACGCGTAGCCATAAAG;GGTGTAATAAGTCACTACGT;CCGTGTAACATCACCCCCTG	-0.94;-0.22;-0.16;0.42
Tor4a	0.0160495	GCACAACGTTACGACCTCGA;CTGGACAGTGATATCGTGCA;GTGTAGGCAAGAGTCACGTG;CTCATCCAGGACCAAGAGAG	-1.21;-0.15;0.53;0.89
Gm38574	-3.44316	CTTTGTGCAAACTTGCCGGG;CTCAGAACAGAACAAGAAGA	-3.46;-3.43
Brd9	-0.19193	GGAACACTGCGACTCAGAGG;ACGATCGCTCAGACCACGAA;ACTTGCTAGACAGTGAACTC;ATTAACCGGTTTCTCCCGGG	-0.57;-0.37;-0.03;0.21
Snrnp35	-2.52209	CAGGCCATCAGCATCTCTGT;ACTGAACTTGCAGACCAAAG;GAGCTAGAGAGGACTCTCCG;CCCGGTATGGTGACATTCGG	-3.08;-2.78;-2.3;-1.93
Abi3	0.612443	AGAGGGCAGCCGCACAACAG;AAGAAGACCTCGGCAGACAA;CTTGAGGCCTCACCCCAGCG;GCAGTGCGGAAGGTGCCAGT	-0.06;0.25;0.93;1.32
Pou1f1	0.0364625	AGGATACACCCAGACAAACG;AGTTTAAGCAGGAACTCAGG;GGAGACACTCAGCGGCACTG;GGGGGGAAATCCATGACTCA	-0.78;-0.51;0.37;1.07
Cd274	0.215314	CTCAGCACAGCAACTTCAGG;GCTTGCGTTAGTGGTGTACT;TCCAAAGGACTTGTACGTGG;TGCTGCATAATCAGCTACGG	-0.3;0.14;0.4;0.62
Cd276	0.000408032	ATCGAACAAGCCCCGCTCGT;AGCTGTGCCAGACTGAAGCC;ATCACGTGCTCTAGCTACCA;CGCGTCCGAGTAACCGACGA	-0.55;-0.44;0.44;0.55
Fignl2	-0.088539	CACATCCGCCCACTGCACTG;CCTCTAGCCTCGCTCCACGA;CCGGCTCGTAAGCGTACTTG;AGTTGTAGAGCGGCGCCGAG	-0.82;-0.41;0.4;0.48
Fignl1	-1.09803	TAGTAGTGCACGGTATGCAT;CAATAAAGGAAATCGTTGTG;TCTTCAGACAATCATCAGTG;CAGCCGAGCACTCTGAAAAG	-1.68;-1.1;-1.0;-0.61
Dqx1	0.600311	TGGATTTAGAATACAGGCGG;GGAGAGTAGCCCCACTGGAG;CAGGAAGTAGCCTCAACCCG;GGACCTCGGAGTGATCCTGT	0.26;0.41;0.42;1.31
Gm12643	-2.74792	ATACGACAAGCTCTGTAAGG;CTTCAGTCTCTCAGAGACCA	-2.85;-2.64
Nrk	0.0363814	TGATCAATAGTAGAATAAGG;GCTCAGTCACTGATGTAGTG;ATCACAATGAATCACCTCTG;GCTGATCGAGGGACTATCCA	-1.44;0.12;0.62;0.85
Rps12-ps6	-3.54076	GGATGCGAGCACACACAGAT	-3.54
Rps12-ps5	-3.15583	CGTCAACACTGCTCTACAAG	-3.16
Rps12-ps4	-3.426	AAGACCGCCCTCATCCACGA;CGTCAACACTGCTCTACAAG	-3.7;-3.16
Rps12-ps3	-3.46425	AAGACCGCCCTCATCCACGA;GGATGCGAGCACACACAGAT;CGTCAACACTGCTCTACAAG	-3.7;-3.54;-3.16
Rps12-ps2	-3.54076	GGATGCGAGCACACACAGAT	-3.54
Nrm	-0.229976	TGAGGAGCCAGGAAACAACG;GAAACGCACGAATTCCACTC;CAGAGGCCCAGTGTTATGGG;GCACAGCCTTATGGCGACTG	-0.66;-0.59;0.0;0.34
Nrl	-0.112312	TGATGAAGTTCGAAATAAAG;CTCCCTGAATAGTAGCCAAG;CACAGACATCGAGACCAGCG;GTATGGTGTGGAGCCCAACG	-1.48;-0.18;0.38;0.83
Rps12-ps9	-3.3483	GGATGCGAGCACACACAGAT;CGTCAACACTGCTCTACAAG	-3.54;-3.16
Cox7b2	-0.373089	GCAATATGATGCTAATTAGT;GAAGAAACTCATGACAAATA;GTTTAGTGCATATCTGGCCA;CCAAGCATTCTGAAAATTGT	-0.94;-0.71;-0.04;0.19
Rara	0.0115397	ATCATCCGGCTACCACTATG;AGATTCTGCGAATCTGCACG;GAGCTACACGCTGACGCCTG;CAAGTGCATCATTAAGACTG	-0.63;-0.05;0.3;0.43
Aoah	0.249234	AGTGACAAGACAGTGTACCC;CTGAACCAAGAAATAGCAGG;AAGCTGTCAGCCATTCAGGG;CCATGGTAGAGGACCTCCTG	0.13;0.2;0.2;0.47
Rarg	-0.411716	GCTACAAAAGTGTTTCGAAG;ACACTATGACATTCTCGGAT;TGGGCAAGTACACCACGGTG;AAGCATGGCTTATAGACCCG	-1.22;-0.43;-0.28;0.28
Ufm1	-0.571931	CTTTAAAATCACGTTGACGT;ACACTTTGTACGGCAGCCGC;ATAATCGCACTTGTAGCTGC;AACTTTAGCACTGCTGTGAA	-1.09;-0.54;-0.43;-0.23
Rhbg	0.522895	CATGACAATTCACACATTTG;TGAATAGTATGTGTTGACCA;CCTCTTTGCCATGATCGGTG;ACTCGTTGTCCACGTTACTG	-0.0;0.22;0.62;1.25
Fbn2	0.640917	GTTGAGGTTACGAAGCCACG;CAGACTTGGTCACCGCACCC;GAGTGTATGATAATGAATGG;AAGGTGTGACTTGCGAAGGT	-0.12;0.35;1.02;1.32
Fbn1	-0.546534	AGCCCATGTCGCATTCACAG;GCTTACCGATGCATTCGCCA;GAATGCAGCATAATGAACGG;GAGCTGTGTAGCAGTAACCA	-1.05;-0.78;-0.64;0.28
Rars	-1.5962	GGTATTAGGTTAAACCATGT;AACGATAGTGAAATCAGATG;ATAGGCTGAATATTCTTCGA;TGACTTGGTGTCACGATCAG	-2.35;-2.26;-1.0;-0.78
Wnt5b	-0.667467	GACATCAGCCATCTTATACA;GGCGCTCACTGCATACGTGA;GGAGCACATGTCCTACATCG;GCGCCAATGATGAACATCTC	-1.34;-0.77;-0.5;-0.06
Wnt5a	0.072183	ACAACAATGAAGCAGGCCGT;GCATGTGGTCCTGATACAAG;CTGGGCGAAGGAGAAAAACG;AGGGAACGAATCCACGCTAA	-0.47;-0.06;0.04;0.78
Crat	-0.392409	TTTGCTGCCAAACTCATCGA;GCAGGCCAGATGCTACATGG;TCCACAAGTGCAACTATGGG;ACCACCCACGCATATAACCG	-1.31;-0.52;-0.08;0.34
Pcdh9	0.182923	TTTCTGAAAACAACCGACGT;TGCCAAAGTATAGTACTGTG;TGGGACTTATAATGTACCTG;ACTCGATACTTTCACCAGAG	-0.24;0.28;0.34;0.36
Obox7	-1.0167	CTACTTCAGCAAGAGTCTGA;GGACTCTGACTCATTTGAAA;GTACTTCCTGGGGTCACTAG;ATTGATTGGTGTTACAAAGA;TGATGAGTGCCAGTACCCAA	-1.67;-1.43;-1.02;-0.63;-0.33
Obox6	-0.472654	TCAAGTATACAAATGCAACC;AATACGCACTGTATACACCG;CCACCGGGCTAAGTCCAAGC;ATGGTGCGGTCACCTAGTTA	-1.64;-0.85;0.29;0.31
Obox5	-0.751846	CTACTTCAGCAAGAGTCTGA;GAAGGATCATCAAGACAATC;GTACTTCCTGGGGTCACTAG;ATGGAGCTGGCAGTATCAGT;AAGTTCCTTGCCGGTTCTTG;GTCAAATGGAATCTCTAAAG;ATTTGGGATCTGATTTCTAT	-1.67;-1.38;-1.02;-0.47;-0.38;-0.25;-0.09
9430015G10Rik	0.162451	TGCTGATGAAGAGTGTCCCC;AGAGCCATTGTATGTCGGGA;CCAGCAACCTGAGTGTTGCA;TGCCTCGGTACAGGTCTCTG	-0.33;-0.1;0.02;1.06
Obox3	-0.954151	ACAGGCCTGAAAACAATGCA;TTAACATATCTATCTGACAG;GTCCGAGTCAACAACAGGTA;GTACTTCCTGGAGTCATTAG	-2.29;-1.45;-0.2;0.12
Obox2	-0.919404	CTACTTAAGCAAGAGTCTGA;GTACTTCCTGGGGTCACTAG;TAACAAACAAACTAGCCCAA;AAGTTCCTTGCCGGTTCTTG;TGGGTATATTCGAATCCACT	-2.47;-1.02;-0.45;-0.38;-0.27
Obox1	-0.727343	GTGTACACCAAAGAACAGCA;GTACTTCCTGGGGTCACTAG;TCTGACGCATTTGAAAAGCT;TGGGTATATTCGAATCCACT;CTACTTAAGCAAGAGTCTCA	-2.09;-1.02;-0.31;-0.27;0.05
Pcdh7	-0.173055	ATTGCGACCAAAGTCACGAT;TAGCCGTCTTACCGACTCGG;GACCACCCGGGAGTTCAACG;AAGATGGCCTGCGAAGACCG	-1.0;0.08;0.09;0.14
Kcnv2	0.161538	AAAGCGCTGCAGGTTAGGGG;CTACAACTTCTACACATCCG;GCCTACGTTCACTTTCAGCG;TAGTTGCCCTCGGTCCATTG	-0.08;-0.06;0.08;0.7
Kcnv1	-0.0356363	TTGCGATGATGCGAATCCGG;GAAGCGCAGAACGAACTCCC;TGCTTTACAGTCAACGTGGG;GCTCTGCGCATGCTGAAACT	-0.28;-0.2;0.08;0.26
Scfd1	-2.7179	GGCATCACAAAGTACACTGC;TATGTGTTCTAAAACAGCAG;CTGTTTAAGTGGAAATCCTA;TTCACAGGGACTAGAAGGAG	-3.71;-3.25;-3.01;-0.9
Scfd2	-0.0199172	CCTCACTGCTAACCACGTAC;TCTCTACTAAGTTGTCTCCG;GTAGCGATGACCCGACTGAG;ACAGTGCCAGACCCGACAAG	-1.45;-0.46;0.91;0.92
Ipmk	-0.217911	ATCTTCACGTCCATTATACA;CTCTACCTTCTGAATACTGG;AGACGCCGTAGTATTTGGGC;CAAACGATAGAACTTTGGCG	-0.58;-0.45;-0.18;0.34
Gm21245	-0.178657	CATTTCCTACAAGAAGGATC;TTGGCTGCAGAATTTCTCAC;TGAGGAAAAACTACTTTGTG;GCAGCCAACAATATTCCCCA;CAACCAGTGCGCCTGCGAGG;TAGGAGGAAGCCTTCTTCCC;ATGGCCTTCCAATGGGTGAC;AGAGGTACAACACAAATTTG;CCAGGAGCTGATAGACGTAG;AGTCCTGTAAGAATGGCACC;AGGTGGACATCCCTCACCTG;GCTGCAGAATTTCTCACGGG;AGGCGCACTGGTTGGCAGAG;GAGTGGGATGGTGCTAGCCC;GAAGCCTTCTTCCCAGGCCC;GCTCTGAGGACAACTGGAGT;AGCCTTCTTCCCAGGCCCTG	-1.54;-0.97;-0.6;-0.45;-0.31;-0.23;-0.17;-0.15;-0.09;-0.05;0.01;0.02;0.09;0.32;0.32;0.39;0.39
Gm21241	-1.06969	CAGAAGCAGATGAAGATATG;TCACATAAAGAGAAAATGGA;TATGTCAAAGAATCTTTCAA;AGCAGAAGCAGATGAAGATA;GCAAAACGAACGAACGAGAG;TTGAAGGTGATACCAAAGGA	-2.25;-2.2;-0.74;-0.73;-0.26;-0.24
Gm21242	-0.276418	CATTTCCTACAAGAAGGATC;TTGGCTGCAGAATTTCTCAC;TGAGGAAAATCTACTTTGTG;GCAGCCAACAATATTCCCCA;CAACCAGTGCGCCTGCGAGG;ATGGCCTTCCAATGGGTGAC;AGAGGTACAACACAAATTTG;CCAGGAGCTGATAGACGTAG;AGTCCTGTAAGAATGGCACC;GCTGCAGAATTTCTCACGGG;AGGCGCACTGGTTGGCAGAG;GAGTGGGATGGTGCTAGCCC;GCTCTGAGGACAACTGGAGT	-1.54;-0.97;-0.66;-0.45;-0.31;-0.17;-0.15;-0.09;-0.05;0.02;0.09;0.32;0.39
Gm20599	-1.74503	TATGTGTTCTTCTATGAATG	-1.75
Maml2	-0.117865	TTCTGAACTGTAGATAACAA;GGCAAATAACGGTAACAATG;TGGTTGCAAAGACTGGTTTG;AGTGAGTTTAAACTCTAACC	-1.15;-0.98;0.8;0.85
Maml3	0.671932	AGCACAGCACGGTAGTCGAG;TCCGCATTAAAATGGGTCAG;AGGCACTAACTTGCCATCCG;AATAGACGAACTGGCCAACA	0.28;0.37;0.75;1.29
Mypop	-0.468915	ATCACCAGCTGGAAACGCAC;CTTCGACCGCTAGTACACAA;TTCTCCTCGAAGGAGAAGCG;GTCGGGTGAGCGTGGCCGAG	-1.51;-1.24;0.26;0.61
Maml1	0.111776	CAGACCCTTGGTTATTCACG;AAGGAACATCTAAGGGACTG;TCACACAACTAGTCAACCTG;CATGAAGGACCTGTTTACGG	-0.45;-0.41;0.26;1.05
Gm20594	-0.0292644	TAGCATGAATGGCTAAAGGA;CTAGCATGAATGGCTAAAGG;AAATTGACCTTTCAGTGAAG;GGACTAGCATGAATGGCTAA	-1.25;-0.59;0.45;1.27
Qk	-2.51979	CTTACATGTACTAATCACTG;GAAGAAGTTACTGGTACCTG;GGATGTAAAATAATGGTCCG;GCAGAATTGCCTGACGCGGT	-3.56;-2.76;-2.25;-1.51
Gm32092	0.0266575	GAGTTAATGATTCATTGCTG	0.03
Oprm1	-0.0537462	TTACAATCACATACATGACC;CCGTGCGGTTAGGACCGCAT;TTAACTACCTGATGGGAACG;ATGTGGGATGAGAGAACGTG	-2.09;0.35;0.59;0.94
Ppp2r5d	-0.0411451	CATGACTTTACTGAACTCCG;CCTGTGGGATTCGATGAAGG;GGCTCCGGGCTTATATTCGT;CTCACCAACCCAGGAACGTG	-0.76;-0.09;0.24;0.44
Ppp2r5e	-0.138565	GACTACATTACAATAAGCAG;TTTAAATAGTCCCGTTCTCG;GAGGGATCAACACTTTCACC;GGCCATGATGCCTCGAGGGT	-0.9;-0.06;0.17;0.23
Ppp2r5a	0.334255	ATTTACCTGTGCGTGAAACA;CGGGGGTTACCTTTGAGCTG;CTCGGTGATGAATTTACCTG;ATAGCTCATACCTGTATGTG	-0.05;-0.0;0.51;0.89
Ppp2r5b	-0.0211771	CGGGCTCGATGAGCACACCC;TGAGGTACTCACGTTCCCGG;CCCTCCTATAGGTTATCCGG;CCGGAAACTGGCCCAATGTG	-0.47;-0.17;0.24;0.32
Ppp2r5c	-0.124389	GTTTCCTGATGTAAGCACGC;GGCCAGGCTGCTTCTAACGT;CTGGGGATGGTAGACACTCA;CACGGAGCCCATTTACCCCG	-1.64;0.28;0.31;0.56
NO_SITE_51	0.306342	ATGTGTCATAGCGGCGTAGG;ATGGTGGCTGTACTCGTAAC;ATGTTACGTACGTGATCTCC;ATGTGTATGAAGCCCGTCAT	0.25;0.25;0.28;0.44
NO_SITE_50	0.0138922	ATGCCAATGCCGTTGTTAGC;ATGGGAAAGCCCACGACAAT;ATGATGTGATCCTTCGCCGA;ATGGACCCTTCAGTGCGGTA	-0.73;0.08;0.22;0.5
NO_SITE_53	-0.0712247	ATTATTCCTCCGGATGACGA;ATTCAGTGTACCGGTCAAAT;ATTCGGACCGTTATCTCACC;ATTCCGTTTGCAGCGAGACC	-0.77;-0.37;0.4;0.46
NO_SITE_52	0.168751	ATTAGGTGACTGGAACACGT;ATGTTGCAGTTCGGCTCGAT;ATGTTGCAGCGCTGTACGCC;ATTATAGCAGCCCCCCGAAT	-0.54;-0.44;0.74;0.91
NO_SITE_55	0.0992565	CAAACGAGGCCACGTACGTG;CAACACGTGCGAGCGAACTG;CAAAGTAACTATCTCGTCGA;CAACCGTGCGATGCGCGCTA	-0.22;0.04;0.13;0.45
NO_SITE_54	0.47606	ATTTGCCCGTCCATACGCGG;ATTCGTGCATCGCGGGGTTT;ATTTGAATGCTCCCGTCGAC;ATTGTTCGACCGTCTACGGG	0.34;0.34;0.42;0.8
NO_SITE_57	-0.200353	CAATATCTAAGCGCTAACGA;CAATACACCGTTAACCCTCT;CAAGGATCGTGCCGTGATTT;CAAGGGGTGGTCATTGCGAC	-1.04;-0.03;0.09;0.18
NO_SITE_56	0.435416	CAACCTGCCTAGCGACCCGC;CAACGATCAGGCGTGTTATC;CAACGGTCACGCTAGAATAA;CAAGAGTTAACCTCGACCGG	0.24;0.26;0.41;0.83
NO_SITE_59	0.370208	CACCCCGTAGCAACGATAAA;CACAATACGCGGCAGAGGTC;CACCCGACTCGGCCGTAAAG;CACACGCCGCGGGCCGTGAG	-0.8;0.2;0.94;1.13
NO_SITE_58	0.24414	CACAACGCCTACCAGCGGAC;CAATATTCGACCTACGCTCC;CAATATGCACGTAGCCTCGT;CAATGGCGTCTGCCGTTCAG	-0.09;-0.07;0.51;0.63
Tmem184a	0.0234414	TGGAGTAGGACATACCACGG;TTGTGCTTCCAATATCTGGG;TGACCGAGGCATTGTACACG;GCGGGGCGGTATAGGAACGT	-0.34;-0.05;0.09;0.4
Tmem184b	0.175969	CCTACTCCATCGGATTCCTG;GGTCACGTAGAGGTACCCAC;GCCATCATGTCTGAGATCAG;GACCAGTACTACGTGTACTT	0.06;0.06;0.19;0.4
Tmem184c	-0.96455	AAATATTCCAGCTATAAACC;ACAAATTATTTAGTATAACG;TCCCAAAATTGCAATATACG;GTTCCTCTGCGTAAAACTCG	-1.53;-1.31;-0.55;-0.46
Lzts1	-0.156697	AGCTCAATCGATACTCAGAT;GGAGAGTGGGGAACGCACAC;CCAAGCTGAGGTCCTACGAG;ATCCTCTGGTCACCCCCGTG	-1.53;-0.08;0.2;0.79
1700028K03Rik	-0.44761	CCTAGAAAATCGAAGCCACA;TGCTAAGGAGTGTATGACAT;TCATGTTCAGGATACATCAG;AGATGAGCTGATAATAATGG	-1.17;-0.45;-0.11;-0.06
Atpaf2	-2.24924	AATGGGATCCCGTCATAGAG;ACAATGAATTAGCTACAGGG;CTATGTCCCGCCAACAGGTG;TGGCCCCGGCCATACTGAGA	-3.18;-2.1;-1.96;-1.76
Atpaf1	0.396433	GATGGTGAAAGACAAAACTG;TATTTCAGACAGATGCCTTG;GGTAGTGCACAAAGAAACTG;GGGGCACGCTCCACCCGCAG	-0.17;0.19;0.53;1.03
Igfals	0.264699	CAGCAAGCACCAGCTCATGG;CTTGGAACACATGCTCGGGG;TGTAGATCTTTGAAAGTACG;GGACCTGTCACACAACCGTG	-0.22;0.11;0.36;0.82
Gm12919	-0.900136	CGGCGTCTAAGGGAGGTGCA	-0.9
Orai2-ps	0.263929	AAGCAGGATGCCCAGAACGG;GGGCATGGATTACCGAGACT;CACTTGCATCCTGCCCAACG;ACAGTGCCTGCACCGAATGG	-0.22;-0.01;0.51;0.77
Gm2544	-0.259019	TGATGTCAAACCTACTCCAG	-0.26
Gm10481	-2.79606	GGCCGGTGCTGAGTATGTCG	-2.8
9330159F19Rik	-0.202454	TCCCCCAAATCACCTCAACT;TGGTGTCCAAGAGGAAAACA;TGAGCTGGGGAGATTTCGAG;GATCAAGATGCAATTTCGTA	-0.84;-0.23;-0.19;0.45
Zscan4-ps3	-1.74766	ATAGTGGTGATAATATTCCC;AGTATGCTTTGACAGAGAAG;TGTCCTTGCAGTGCCCAGTG;AATGCTACTGAAGCAAATGT;CTTGCTCTTCTGGCACCATG	-2.49;-2.13;-2.0;-1.25;-0.88
Zscan4-ps2	-1.23635	ATAGTGGTGATAATATTCCC;TGTCCTTGCAGTGCCCAGTG;TTCTTTCTGGATAATAAGAA;CTTGCTCTTCTGGCACCATG;GGAAGTCTACATGATGACTG;AGTATGCTTTGACTGAGAAG;TACTGCCGATGTCCCCATGG	-2.49;-2.0;-1.76;-0.88;-0.64;-0.63;-0.28
Zscan4-ps1	-1.54212	TGTCCTTGCAGTGCCCAGTG;TTCTTTCTGGATAATAAGAA;CTTGCTCTTCTGGCACCATG	-2.0;-1.76;-0.88
Cnot1	-2.23447	ATTGTCTCGAATACTTGACG;CAGCAAAGGACTTCACAATG;TTTCTTAAGACACTACGCAG;TAGCAGCTCATCACATGATG	-2.85;-2.71;-2.62;-0.76
Nifk	-2.75821	TCTGCTAATGTCGCCAAACT;GGCCCAGATAAACTACTCCA;AGGCTCTGACGCAGATCCAA;AAGCGCTATAATCGGAAACG	-3.43;-3.3;-2.45;-1.86
Mcrip1	0.264135	GTCTCCAGAGTTGTCTACAA;AATGTGCGCTTCATTTATGA;TGTGAAAATCTCACTGCTGT;TGGTGAGCGGTGCCTAGTGG	-0.61;0.3;0.51;0.86
Mcrip2	0.0176709	TATTCAATCGAGTAAACGGC;CAGCCCTCGGCACAGACTCA;CCACCTCCCCATCCCTCGAG;CAAATCGGACGTTCTCCTCG	-1.15;0.38;0.39;0.45
Tspyl4	-0.191061	CTTCAGATCCAGATCTTCGG;AGACGCGCCTCCATCCGCAC;TGAAACTTCTGCGCTGCATG;ATTTGACAGCTCTTGATCGA	-1.86;-0.07;0.32;0.85
Tspyl5	0.304022	GCCTTGGCGAAGCTGCGACG;CAGAGCATTCCGGGCTTCTG;CAGATACTCGGAGCGCCACG;AGGCTGACAGGGCATATCTC	-0.08;0.07;0.37;0.85
Tspyl1	0.536772	TCTTCGCAGGAACCCGCTGG;ATCCCGACCCCTAATCATGG;CCCGCGCCCCGAGATGTCGA;GAGTCACCTCCTTCCGTTCG	0.11;0.17;0.9;0.96
Tspyl2	-0.228665	CTCATTCTACCCCAATACGT;GGAGAGCATTCAAATGGACC;CCTGAAGATTGGTCAAGTAG;CACTCAGGGTGAAATACGCG	-2.3;0.16;0.61;0.61
Tspyl3	0.164779	GGAAGACTCTGTAGCCGCGG;GTCGGTTGCACCTAGCCCGT;ATCCAGGTTCAGAACGCGGG;GCCTGCCGCCCATACAAGAG	-0.15;0.14;0.3;0.36
Ccdc170	-0.531252	CTAACAGAGAAACTATCAGG;CTCACCAGAAAGCCCTACAG;ATTTGAATGTGCTCAGTCCG;CAGAGGATGCCATATTGGAG	-1.45;-0.62;-0.2;0.14
Ccdc171	-0.0824987	CCTCAAAGTCTCAAGGACGA;GTTCATGGGAGGTCTCAATG;TAATCTAAATTCGCCCAATG;AGGCGCAGCGGATTCAAGAG	-0.47;-0.14;0.11;0.17
Ccdc172	-0.145538	GATGAAAGAAAATATCGAGA;GAAAATTAAGAAAGCAACAG;CAGTGAGATTATCAGCGAGC;AAGTCGGTGGAACGTAACCG	-0.55;-0.31;-0.05;0.32
Ccdc173	0.286113	CATAATCCCACACGCTGAGT;GCATGTGAAATCCCAAGAGT;AGAAAGAGTAGCTCTTGCCG;GTTACAGGCTAATGGAAGAA	-0.32;0.3;0.45;0.72
Ccdc174	-1.47912	TTACCCACCATTCCTCACTG;CGGATGTCTTCATAATGGAT;CACGAGAGAGTCCCAAATCG;AAGTCGAGCAGAGAAAGATG	-3.01;-1.12;-1.09;-0.7
Ccdc175	-0.308687	AGAAATGCGGAAAAACACGG;AACAGTTACTTCCGGCTCAG;TCTCTAGTGTCATAAATCAG;ATTTATGTAAATAGTGGCGG	-1.52;-0.06;0.0;0.35
Ccdc177	0.0183653	AGTCCTTCGAGCAACTCGCG;CGGCGCCTGTTCACACCGAA;AGGCGAAATTGAAGAGATCG;GTGGCCAGCGAAGCTCCCGA	-0.24;-0.1;-0.08;0.48
Cars2	-2.3718	TTAGATTTGACATTATCCGG;ACAGCAGCGACTTCGCCCTG;GCACATCGAGTGCTCTACCA;TCAGATCATTGCTTTCATCG	-3.25;-2.7;-1.82;-1.71
Sacm1l	-2.31904	AGGATACAGCCATGCAACAC;TTGGTCTTGTAACAGCAGAG;TTTCTACAAAGTTAGCTGCG;TGAGCAAACATTCGCAAACA	-3.32;-3.17;-1.82;-0.97
Rpl21-ps3	-3.55116	ATTCGCATGTATGTGGCCAA;AAGGCCTAGAGAACATGTAC	-3.64;-3.46
Sqstm1	0.438256	TGATGGTTGCAACGGGCCTG;ATGGTGGGCGATGTTCCCGC;CCAGGCGCACTACCGCGGTG;GGGCGGCCATCCCCTGCACG	0.03;0.38;0.62;0.72
Krtap10-4	-1.18328	GCAGTCATCCACCTGCCAGG;GCTGGACACACAGCTTACTG;CAGACAGGTACACAGCAGGA;AGCTGGGGGCACAGCAACTG	-2.0;-1.19;-1.17;-0.38
Saal1	-0.12459	TATATACTTACTCTTAATCG;CTGATACTGGAAACGACACG;AGCTGCCAAACAAGTGCGGT;CCATCCGCATACCTCGTCCA	-0.72;-0.66;0.39;0.49
Papolg	-0.756481	TACATCAACTCGAACAGTAA;GCAACAATTACGTATCAATG;CAGTAGCCACAACAGAAGGT;TCTGGCAACTAGCATTGCCC	-2.53;-0.39;-0.23;0.13
Papola	-0.730983	TAAGATGGTACCTATCACTG;AGTATTACCTACCTTTCGTG;CTCCCATTAATCAGGTTGCA;ACTTCTAGCAAGTGCGCCCA	-1.43;-0.71;-0.54;-0.24
Papolb	-0.279551	ACAATGTGTCTGTTTCGACC;CGATTAGGAGTACACACGAA;CAGTTTGATAACCGGCACAA;AAGAAGCCTTAACGGTTGCC	-0.83;-0.66;-0.56;0.93
Wwp2	0.339099	CGGCTCTACATCATCATGCG;GAGATGAAATACACCAGCGA;ACGTAGTAAAACCTCCCTCG;CCAAAGCAGTTTGTACTGGG	-0.55;0.29;0.46;1.16
Wwp1	0.319488	ACATAATAGGTTCTACCATG;GCTGATAATACTTCAACCAT;GAAATCAGGTATACTCGGGA;CCGGTGGTAAGGGTCCATAG	-0.05;0.2;0.38;0.75
Usp29	-0.179469	TGATAATGTTACAGGCGTAG;TCTGGGGATGTATTAGCCAA;ACTCACTCAAGGCATCCCAT;ATGCCATGTGGGATACTGAG	-0.31;-0.3;-0.14;0.04
Usp28	-0.0276115	ACCACAATCCCAATAACTGG;TACTTCACGGAACGATCCGA;ACTTGAAAGAGATTCTTACG;AGAAATCGGGCAGTGCACCG	-0.93;-0.29;0.41;0.7
Rpl10-ps6	-3.87161	CATGGTAAAGAGTTGTGGCA	-3.87
Usp26	-0.893222	TGAAAAACAGAGCAACCTGA;CTTTCTATCAACATTCCCCA;ATTAATGATTTATTCAACCA;TGGCCGAATACTACCTTGAG	-1.78;-1.53;-0.19;-0.08
Usp25	-0.657143	TACCATCACAGTCCTTACCA;GAAATAGAAAATGACACGCG;TCCTTACACTCCGATAACTC;CAACGACAGGTACATCAGCG	-1.42;-0.87;-0.27;-0.08
Usp24	-0.256596	TCACTGCGTACGCGTCACTG;CATGAGGTAGAATAGTTCGT;TATGGAGCGGTGTATGCCCG;TCAGGATAACTCTACGAGTG	-0.58;-0.56;-0.04;0.15
Rpl10-ps2	-3.87161	CATGGTAAAGAGTTGTGGCA	-3.87
Rpl10-ps3	-3.87161	CATGGTAAAGAGTTGTGGCA	-3.87
Usp21	0.381692	GTGGGGACTTGCGTCCAATG;GCGAAGGGACTTCCGGCAAG;AAGACAGCCCGGAATCGGGT;ACCTTGAGATCAACCGACGA	0.24;0.25;0.32;0.71
Rpl10-ps1	-3.87161	CATGGTAAAGAGTTGTGGCA	-3.87
4931428F04Rik	0.318133	TGAATAATTCGCGGCAACCG;CTGATTCATGAATTGCGCAG;GTGTAAATAGTACTGGCCGG;GCGGCCAACTAACATGGACC	-0.28;-0.1;0.48;1.17
Gm40856	-3.79689	CAGTCATACCTATAACAGTG	-3.8
Gm40857	-3.79689	CAGTCATACCTATAACAGTG	-3.8
Gm40853	-3.79689	CAGTCATACCTATAACAGTG	-3.8
Dstn	-0.0452964	CTTGAAAGGATCAGTTATGG;AAGTGCATAGTCGTTGAAGA;TGACGCCAGCTTTGAGACCA;AAGAGCTGATGTTCTTCCTG	-0.33;-0.09;-0.02;0.25
Parm1	0.0821857	GGTGACTGTGACCCAGTAGC;CTCTAGCCACAACTCTACGG;CTCTGCTCCACACACTGCTA;ACTCCGATAGGGAAGTTGCG	-0.28;-0.11;0.05;0.67
Alas1	-0.960263	AGAGCGCCGCATCTTTGCCG;TGGATGAGGTCCATGCAGTG;TGAGATGGTTAACGTCATTG;TGCAGGAAATGCATGCTGTG	-1.46;-1.38;-0.67;-0.34
Alas2	0.339734	AATACTAAATAGGAACTGGT;ACATCACACAATTCCTCCAG;AGGTACCAGCAAGTTTCATG;ATCCAAGGCATTCGCAACAG	-0.7;0.33;0.51;1.21
Ednra	0.0387134	GAGAGCACAGAGGTTCAAGA;CCTTGGAGACCTTATCTACG;CCTAGCAATGGCTCAATGCA;AAGGGGTGAAGTCTTCCATG	-1.0;0.06;0.33;0.77
Tyk2	0.286082	ATCCACATCGCACACAAAGT;GTGTGGTTACGGCGACAGAG;TAGACCCCCGCATGATGACG;CTTCCAGGACATTTCCCACG	-0.48;0.11;0.43;1.08
V1rd19	-1.09207	GAGAAGTACCATGGAGACAC;GCCTACACTGAAATCAGAAG;TGCTCATGAATGTGGCATCA;TCTCGACTGGTTCTAAACAG;GAACAAGTGTGACAAACTGA;TGTCTTAAAATCACTTGTCT;AGAATTCTTCACTCGCCTCG	-3.17;-1.41;-1.37;-0.6;-0.59;-0.46;-0.05
Smu1	-2.70989	TACCACAGACATACCTCACG;AAATCGATGGTCATACCAGG;GAACCGAGCACACTCCACGT;AGGTGTGGAACTTCACTACA	-3.57;-3.14;-3.03;-1.11
1700006A11Rik	-0.50677	CATAACTCAAGTATTCCACA;AATCCCGAGTTGCAGGAACG;AAGTTAGTTATATTGTTTAG;ACAATGAGGGGACTATAGGT	-1.8;-0.21;-0.02;0.01
Cxcr5	0.056982	GAAGGTCGGCTACTGCGAGG;GGATGGAGAGGAGTCGACGG;GGATGTTTCCCATCATACCC;GTGATGGGATGGTGTTACGT	-0.15;0.03;0.09;0.26
Ttyh3	0.236819	ACGCCATGCCAACCGCACAG;GGAAATGCAAGATGTTGTCG;GAACCCCGGAGTATCGCTGG;GAGCACTCAGTACTGAGTGG	-0.12;0.33;0.33;0.41
Gm17592	-3.46389	GGCGGAAGAAGAGAATGCGC	-3.46
Nfix	-1.36085	TAAACAAAATCACCATGACC;TCAGATAGTTCAAACCAGCA;CTCCAGTTGCGACTGCATCA;TGTGATGTGGCTGGACACAC	-2.29;-1.14;-1.1;-0.91
Man2c1	-0.155033	GCAGATTCTTCATGACGTGG;TGGGTCAAGAGCCAGTACCC;ATGTTGGCCAAAGAACTTGG;AAGGGGCGGACCAACCACAG	-0.34;-0.19;-0.15;0.06
Tnfrsf13b	0.356231	GTGGCTCTCCTCTACGCCTG;ATCAGTACTGGGACTCCTCA;GAAGTCAGGTCAGACAACTC;GTACTACGACCATCTCCTGG	0.21;0.26;0.34;0.61
Calcoco2	-0.101246	CCAATCCAGTCCTTGCGTCG;AGCGCTCCACATCCTTGGGA;GAGAAGTTCTATGCTCCTAG;GATGAAGATGGTTTAGTCCG	-0.17;-0.15;-0.14;0.06
2310057M21Rik	-0.0579103	TGCTTCATTTACCTGAACTG;CAAACCATAATGGAGTCCAT;TACTTAGGAGAGGAGTATTG;GACTGAAGCTGATCCCCGAT	-0.29;-0.03;0.01;0.07
Fbxl21	-0.127343	GAAAGATCTGTAATATGACA;CTGAGAAAGGATATCACAGG;TAGTGAAACAGCCCAAACGT;TTGAATGAGGTCGGGATGAG	-0.86;-0.06;0.1;0.31
Scgb1b29	-1.00116	GGAGGAGCAGGGCAGCCCCG;CATGAAGCTTGCTGGTGCTG;TAGCCATCAACATAGCGGGC;GTTGTAGCCATCAACATAGC;CTGGTGCTGTGGTGATCCTC;GTACTCAACATACTCCTCTG;TATCTTGTCTTCCTCTGTCA;CTCCTCCTGACTTCAGGAGG;TGTCGATAGCACCTTGACAG	-2.5;-1.94;-1.69;-0.96;-0.93;-0.9;-0.76;0.07;0.6
Scgb1b20	-0.761446	AACCTCCCCCTGAAGTCAGG;CATGAAGCTTGCTGGTGCTG;GGAGGAGCAAGGCAGCCCCG;TAGCCATCAACATATCGGGC;CTGGTGCTGTGGTGATCCTC;GTACTCAACATACTCCTCTG;TATCTTGTCTTCCTCTGTCA;ATTGTAGCCATCAACATATC;TGTCGATAGCACCTTGACAG;AAGCCAGCCCGATATGTTGA	-2.03;-1.94;-1.37;-1.11;-0.93;-0.9;-0.76;0.03;0.6;0.79
Scgb1b27	-0.9705	GTACTCAACATACTCTTCAG;TGGTGCTCTCTTGCTGCTCG;TTCTCTGTAAAGCTGGGCAA;CTGCTCCTGATTTCAGAGGG	-3.0;-0.49;-0.26;-0.13
Scgb1b24	-0.725882	ATATTCAACATACTCTTCTG;CAAAGACGATCCTGAAATAC;ACCCACATACCCCTGAATGC;TGGTGCTCTCTTGCTGCTCA	-2.58;-0.26;-0.1;0.04
4930579F01Rik	-0.12938	TTTGCATACCGACTCTCTGG;ACCAGTTTAGCCCTTCCGAG;TAGAGAGACTCACCCGACTG;CATCGCGTCTGAGGATTGGA	-0.62;-0.21;0.08;0.23
Zc2hc1b	-0.518422	CATCTCCCACAGACTTCACA;ATTCACTCTAGCCATTAAAG;TCCTTAAAGCAAAGATTACA;TGTTGGCATACCTTGGGCTG	-2.42;-0.21;0.16;0.4
Zc2hc1c	-0.186452	ACGTCTGCACAAAAGCCCGG;CTGAACTCTGGGGACAAGCA;CGGAGCTCCATAGGACCGAG;ACTTGTCTAGTCCGACACCC	-0.93;-0.14;-0.1;0.42
Zc2hc1a	-0.109818	TACACACCTGGGTCGTAAGA;AGAAAACTGCCACTAAGAAG;ACTGAAGATGCTTTACCCGT;TGAAGGGACTGATATTCCCA	-0.52;-0.5;-0.0;0.58
Col17a1	0.632534	GACGTCATGATATAGCACCT;ACAGAAGGTGTTGACTTACG;AGAGGACGAAGCCAAACACG;GTTCACCACGAGGTCCCATG	0.22;0.28;0.98;1.05
Bcap31	-0.239237	TGAGGCGGCCAAGAAATACA;TACTCACAAGGACAGCAGCA;CAGCAAAGACCTCTGCGTAG;GTGGAGTTGGTAGTGACCTA	-0.92;-0.78;0.21;0.54
Camk2d	-0.312415	ATTACATACATCGTAAGCTC;TAATGCTAGACGGAAACTGA;GATGTAGAGGATGACACCTG;ACTTCACGACAGTATATCGG	-0.52;-0.37;-0.25;-0.11
Nup160	-2.89856	CAGGGCCCAGATATCCGTTG;AAACTCACAGTGTGTCAACG;GCAGGATATATTGTGTGTCG;TTACCAGGTACGTCATAAGG	-3.42;-3.11;-2.77;-2.3
Camk2g	-0.291234	GTCTTGAGGAAAGATCCCTA;TCATCAGAAACTAGAACGAG;CTTCCAGCAACGGTCTACGG;GTTGGTTACAGTGTTACCGG	-0.71;-0.4;-0.12;0.07
Camk2a	0.250216	GATATACAGGATGACGCCTA;CAAACGCATCACGGCCGCTG;GGTGGTGCATCGTGACCTGA;GCTGTCATGGAGTCGGACTG	-0.05;0.23;0.34;0.48
Camk2b	0.227627	CTCACCTGAGAAATTCCGTG;CCAACAGCAACGTTCCACCG;AGTAACGGTGTCCCACTCAG;TACAGAGCTTGACACAGCGT	-0.13;0.32;0.35;0.38
Ubxn8	-0.041348	AGGTTTCAGTGAGTTAAACC;AGAAAAGACGGAGACTCGTG;CGCTGGCCACCGACTCCTAG;CGGCGCGGGATCCCGAGTCT	-1.06;-0.26;-0.04;1.19
Ubxn4	-0.570708	TAGATACTGAACTTTCTGAC;GCCTTGCTGACCAAACAGGC;TCCCTTTGGAAGTAATAGCG;CTCTGGTTTGAACATCCATG	-1.8;-0.95;-0.12;0.58
Ubxn6	-0.153524	ACATACATTCAATAGAGACC;AGAAGCTTACGGATTCCGCA;GAGCGCATCAACTGTCTCGA;TCGGAGCTGCCGATCCAGAG	-0.59;-0.25;-0.15;0.38
Ubxn7	-0.209821	GAGAACTTACCACCAAACAA;ACAGGTTTATCACGACAGTG;CCAGGTGCAAGTGAAAGTGT;CTTGTGCATCAAGTCGATTG	-1.56;-0.81;0.66;0.88
Ubxn1	-0.0672536	CTTTAGAACGAGAAAAGCAG;AAACAGAATGTTGGAACTTG;CCCACGCCCTCAGAGCAAGT;GCATGAAGACGACCCCGATG	-1.31;-0.28;0.47;0.85
Xkr5	0.35508	AGGATCAACGCAGCCCTCGG;CAGCCCATAGCATGGTATGG;AGGGACCAGCCTGTGGACTG;GAAATGCTGTGGCCCCATCG	-0.31;0.27;0.58;0.89
Gm10069	-2.46055	GGAGTCGCCAGTATTTACCG	-2.46
Xkr7	-0.44634	GGAGATCATCTACAATATGG;GAGACTCAAGAGATGACAAG;ACCAAGGACAGCGACATAGT;CCGACGGCGCCACCGACCTG	-1.06;-1.0;-0.34;0.61
P2ry14	-0.292326	GAAGACCATACCGTACAACA;CTATCTCAAGAACATAGTGG;TCTGACGTCTATTGTGCAGT;TGGAGCTCAAAAACGAGCTG	-1.03;-0.25;0.04;0.07
Xkr9	-0.0687138	CCCGATAAAAATCTTCTCCG;CTTGAGAACGGGTTACCATG;TAGAGCTGGAGAATGAGTTG;TTCTGCTGTTCGTAGATGTG	-0.33;-0.3;-0.19;0.55
Xkr8	0.332224	AAGGAGCACGTACTGGACAA;GACAGGTACGCAGAGACCGA;AAGGACGCGAGAGCTGCGAA;AATGCAGGGCCACATAGTAG	0.23;0.27;0.4;0.43
Tex52	0.173259	TGAAGGACAGGAAGCTGTGT;GACTTCAACTCTGTGCATGG;TAGGGTACGTCCGGTCTGGT;AGTCCAAGTCTGATAGATTG	-0.07;0.18;0.22;0.36
Tex55	-0.800254	CATATAACAGAAAAACAGGC;AAGACTCTAGTGATCCACAC;GCAGACTGACCAAGAAACTT;TCACTATCTTCAAATGTGCA	-2.74;-0.65;-0.05;0.25
Pmel	-0.0937264	TGTACAAATGCCAACCACAG;AGTGACTGTCTACCACCGAC;AATGATGGGCCTACACTGGT;GGTTGTTGCTTGTGCAACGG	-1.03;0.02;0.19;0.44
Grap	0.270408	CTGATGAAACGCAACCACCT;TGGTACAAAGCTGAGCTCCG;GCACTTCAAAGTGCTTCGAG;AGAAGTCGACCAGCTCGTTG	-0.45;0.2;0.44;0.9
Gm14760	-2.41612	GCTGTGGCGTGATGGCCGTG;GGCCGGTGCTGAGTATGTCG;TGCCATTTGCAGTGGCAAAG	-3.11;-2.8;-1.35
Gusb	0.274587	GGTGTCAGTCTTGTAGACGA;TGTTCGAATCCCGATAGGAA;GGAGCGCGCACCTCCCGTAG;GTATCTTGGGTCCATCGCCG	-0.19;0.36;0.39;0.53
Zfp987	-1.51702	TCTACCATTAGTCTCAATCA;GAAATTCACTACATTTGTAA;TGAAAAAAGACAATATTGCA;CATACGTGGAAAGAATGGGA;AATACTAAGATAGGATTCTT;GAATACTAAGATTGGATTGT;TCAGAAAATCATTGCATACG	-2.74;-2.19;-2.16;-2.1;-1.09;-0.21;-0.14
Zfp985	-0.634492	TCTACCATTAGTCTCAATCA;TAAATGGGACAAGCTTAGCA;TGTTTCTAAACATAAAGACA;ACTTCTAAGATGGATCTGAT;TCAGAAAATCATTGCATACG;TCTCTGATGATAATTAAGAC;TTTGTAAGGTGTATATTGGG	-2.74;-0.9;-0.59;-0.31;-0.14;0.07;0.17
Zfp984	-1.59773	TCTACCATTAGTCTCAATCA;GATACTAAGATGGATCTGAT;GGCCTTGTACTTCTCACTGG;ATCCATCTTAGTATCCATCA;CATACATGGAAAGTATGGGA;TAAATGGGACAAGCTTATCA;TCTCTGATGACTATTAAGAT	-2.74;-2.72;-2.31;-1.89;-1.79;-0.28;0.55
Zfp983	0.0037612	TTGATGAACAGTATCACATG;GAAGAGAAATCACATGAGTG;GTCTGTAGACTTCTCACAGG;CCAGAAAATCCATACTTCTG	-0.45;0.01;0.06;0.4
Zfp982	0.30784	CTGAAAAACGCAAACTGAGA;GGCCGTGGAATTCTCACTGG;TTTGTGAGGTACACAATGGG;CATTTCATATGTGCAAAGTG	-0.28;0.15;0.48;0.89
Zfp981	-1.14533	ACTGTGTAAACTGTTTAAAG;AGCACATTGTCAATGAGCAT;AAAGCATCAGAGAATTCATA;GTTATAAGGTGTACTTTCGG;CAAAGTCAGCAGAGAAAGCC;GAAATGAACACTTACACTTG;TAGGTTTGAGAATTGGAATG;TCAGAAAATCAATGCATCTG	-2.56;-2.17;-2.04;-1.14;-0.59;-0.48;-0.27;0.09
Zfp980	-1.46769	CATATGTGGAAACTATGAGA;ACTGTGTAAACTGTTTAAAG;AGCACATTGTCAATGAGCAT;TGGAAACTATGAGAAGGAGA;AGTCAGCAGAGAATTTATCC;GTTATAAGGTGTACTTTCGG;TCACACTCACTGCATTGGTA;GAAATGAGCACTTACACTTG;AATACTAAGATGGGAAAGTT	-3.01;-2.56;-2.17;-1.93;-1.57;-1.14;-1.14;-0.62;0.93
Xkrx	0.0727893	AGAAGAGCACCAGAATCACG;CCTGATATCTGTCACCTACG;CTAAACGGGAAGGTAAAGCG;ACCTGATAACAGGTCCCAAG	-0.76;-0.49;0.58;0.96
Rtn4rl1	0.0178967	GCATGAGAACCAGCTACAGT;GCCCTCTACCTCTATAAGTG;GGGTAGCACACACAGTCTCG;CCTTCGCAGCCATTCCCACA	-0.2;-0.07;0.16;0.18
Rtn4rl2	-0.0160959	TGCAGAGCATAGGACAGCTG;CACCCAGGATGACTTGTTCG;CTCACGGAGCACGTGTTCCG;GAACTCGAGCGCCGGCAGGT	-0.45;0.09;0.1;0.2
Fbxw8	-0.319187	CTTCTGAACTTCAAACTCCG;CGAGCTGTTGATCCTCACAA;TGTAATCGGAGAATCTGCTG;CTCTTCCAGATACACGTCAG	-2.06;0.03;0.06;0.7
Fbxw9	-0.83381	CCGCATCAATGGAAGCAAAG;GTGACCATCTATGATCCCAG;CGTACGCGCACCCTACCCAG;CCAGGGCAATAGCACACACA	-2.54;-0.81;-0.61;0.63
Pnmt	0.20185	TTGTTGCGGAGATAGGCGCG;TCCAAGGCCCGACGCCATCA;AGAACGCCAGCTTCGAGCGA;ACCAGACTGGGAGTTCCCAG	0.02;0.15;0.18;0.46
Fbxw2	-0.22188	GTAGTAAAGTGCATACACTC;GCATACTGAATGGGTCACCA;GTATGCACTAGTGTTCAGTG;CCACCTGATTAGTCTGAGTG	-1.65;-0.68;0.65;0.8
Fbxw4	-0.33628	CTGCTCCTACCTCGACACGC;ACCATCCGGGCGGAACTGGT;GAGTAATGGGCTGATAGCAA;GCCCGGGCCTCGCTCAACAC	-2.14;-0.3;-0.26;1.35
Fbxw5	0.34243	GTTCCGGCGGCTCTATGACA;GCCGTAAACCTTTCTTGACG;TCTGATGCGGTGAGTACGTG;AGAATGTCAACGTGGTAAAG	-0.15;0.5;0.5;0.52
Fbxw7	0.737775	GTATGTCACAGATTCTAACG;ACGTTAGTGGGACATACAGG;GTGTTGCTGAACATGGTACA;ACTGTAGGCATGTGATCACA	0.05;0.7;1.06;1.15
Pard6g	-0.305394	CCACCACATCTCTAACACCG;CGAGTCTTCATCCAGAAACG;ATTTCTCGAATGGTACCCGG;TGAGGGATGACGGTCTGCGT	-1.45;-0.36;-0.02;0.61
Aadacl2fm3	-0.597694	CCTGAAATACAGATGCGAGT;CTTATGATTCTGTAAACCGA;TCTCATAGAGAATATAAGCA;AAAGTGCGAGTCATAGATGC	-1.49;-0.65;-0.38;0.12
Pard6b	0.230308	AGGGTCCGTCTGTACAAGTA;CCACCAACACGTCGACATTG;TCAACGGTATAGAAGTGTCC;TGGCGGTGGAAACCGCCTTG	-0.13;-0.07;0.21;0.92
Pard6a	-0.0579447	CTGAGACCCACCGACGAGTG;TGGGGCAAGCTGATTAACAA;CCAACGATGACAGTTTGCAC;AGATGGCATGAGTGTTCGCG	-0.44;-0.27;0.07;0.41
Col4a6	0.533462	AAGATCTGGTAACATACAGG;TCTAGTTCCCCAGTAGATGG;GGGTTCCAGAAGGGCCACGT;AAGGAGTAGATGGGTTACCA	-0.19;0.46;0.79;1.07
Col4a5	0.0168575	GAAAAACTTACAAGTCCGGG;GCTGGGATAACTGGTCCGAA;CTGGTCCCAAGGGTATATCA;CCTGGAACATCAAACCCAGG	-0.27;-0.24;-0.22;0.79
Col4a4	-0.228908	CTTTGCATGGTAATACCTGG;TGGGATTCCAGGCCCCAATG;AGGCTCAGGATCCTTACCCG;GGACTACCGGGACTCCACAG	-0.86;-0.07;-0.05;0.07
Col4a3	-0.861587	ATACTCACAAAAAATCCCGG;TATTCATACATAGGTCGAAG;ATACAAACCGGTTCGCCCTG;GTAGCCCAGGCAATCCCTCG	-2.33;-2.29;0.31;0.87
Col4a2	-0.0214084	AACATACCCGGTATTTGTCA;GGGCGTAATCTCAAAAGGCG;GGTGTGAAAAGACCTATCGG;GAAGCTGGAGACTGCCAATG	-1.2;0.05;0.48;0.58
Col4a1	0.572519	GGGAAGCCAACTCCTCCGGG;TCCTGGCACAAAAGGGACGA;CTCTAGGAAGCACTTACCCG;GGCCAGGCATATCCAGTCCG	0.08;0.3;0.79;1.12
Smim22	0.0930468	AAATGTGAGAAAGACCACAA;GGCTTTCTGATGAGGAGCTG;GCCACTGCAGAGGAAGTACT;CAGCGACGTCCCATTCCGAC	-0.16;-0.09;0.29;0.33
Smim23	0.058159	CACCTGATATCCCCATACCC;GTGTCACAGGATTCTGAAAG;GAAGTCACCACTGTGATGAC;AAGAGCCATTAAGGACCCTC	-1.17;-0.2;0.75;0.86
Arl4d	0.208451	TCATTGGGTTGGATTCCGCG;CGGGTGTAGGAGCGCCACAG;AGCAAGGCTTCCGACAACCA;GAAGTGCGGCAGAAAGGACG	-0.7;0.25;0.39;0.9
Vwc2l	-0.0078716	AATTCATCCGAAATGTACAA;TTGATGACTATCGAGGGAAA;GCGACACCATTCACATGGAG;CAGCAGAGGTGACCAATCCA	-1.14;-0.12;0.42;0.81
Smim26	-2.73382	CGTAGACAAGGGACATTCGC;ATGTCCCTTGTCTACGCACT;GAAAAACGCCGAGCCCAGCA;ACGGAAACGGTCGAGCTTGG	-3.16;-3.03;-2.95;-1.8
Arl4c	-0.360873	TTGTTGGCGATAACCAGGAG;GAGAAGATCAAACTGAGCAA;CACGGACGGCATCATCTACG;TCGGTGTTGAAGCCGATAGT	-0.97;-0.77;-0.14;0.45
Smim24	0.0786539	GCAGCCAGGCCTACTAGCCA;TGAGGAGGCTACATTCAGAA;AGGCTTCAGGCGGCGCTCTG;TTTGGCGCACCAGACACGAT	-0.28;0.01;0.13;0.46
Arl4a	-0.104163	TATTAGCAACTATAAGCACA;GTTAAATCCTTTGGTAGGTA;TCATACACCCGATGCACAGA;ATGTGAAAGGACTGAAAGGA	-0.69;-0.14;-0.12;0.54
U2surp	-1.16999	CTTCCACCTGTAGTAAACAT;AAGTTAGAAGAAATCTTGCG;GTGAAAACGTTTGTTCGAGG;AGAAGAAATAGATCGTCTGG	-2.01;-1.36;-1.04;-0.28
Pgs1	-2.31133	GAGCGCTTCAATGAGACCAT;AGTCCTGCAAGAACACGTAG;GCAGGGCGACGACACAGTGG;TATGTCCCGAGGGTGTACAC	-3.48;-2.64;-2.15;-0.97
Tubb4b	-0.754396	CCTTATCAGCAAGATCCGGG;TTCTCTTACAGGTCAGAGTG;GGGTAGAGGAGCCTTACCGG;GAGGTAATCAGCGACGAGCA	-1.57;-0.73;-0.55;-0.16
Tubb4a	0.234292	GGCCAAGGGTCACTACACCG;GATCATGAATACGTTCAGCG;CAGCTCACCCACTCGCTCGG;CCCCATGATAGGTCCCAGTG	-0.28;0.06;0.31;0.85
Pf4	0.500457	GCTGGTCCCGAAGAAAGCGA;GTGCTTAAGATGGATCCCAG;CTGGTGACAGCAACCACCGC;CTGCGGTGTTTCGAGGCCTC	-0.67;0.35;0.85;1.47
Prl3d3	-0.738551	CCATACTCCAGAGAATCGAG;GAAAGAACCTCTGAAACACC;AAATTCCCTATACACATCTG;GTCCTCCAAACCAACTGCCA;GTCTCATAGTACATTTATCT;CGAGTATACAGGTCTTCAGT;GGTGTCAAGCCTATTCCTTT;GATGGAAGCAGTATGACACA	-1.57;-1.29;-1.22;-0.91;-0.49;-0.3;-0.18;0.05
Prl3d2	-0.858673	CCATACTCCAGAGAATCGAG;GAAAGAACCTCTGAAACACC;ACACATTCTCCCAAAGGAGT;AAATTCCCTGTACACATCTG;CGTGTATACAGGTCGTCAGT;GATGGAAGCAGTATGACACA	-1.57;-1.29;-1.26;-0.83;-0.25;0.05
Prl3d1	-0.731555	CCATACTCCAGAGAATCGAG;GAAAGAACCTCTGAAACACC;ACACATTCTCCCAAAGGAGT;AAATTCCCTATACACATCTG;GTCCTCCAAACCAACTGCCA;CGAGTATACAGGTCTTCAGT;GATGGAAGCAGTATGACACA;ACACCTGGTGTCTGCACTGA	-1.57;-1.29;-1.26;-1.22;-0.91;-0.3;0.05;0.65
Gm12335	-2.93105	CGATCATATTAATTTGAAGG;CATGGCCGACGAGAAACCCA;GGCGGGACAGGATGGTTCTG	-3.2;-2.83;-2.76
Gm12338	-1.38562	TCCCCGGACCCTCCTCATAG;TTTCAGTGGAAAACAAGTGG;GCCACTATGAGGAGGGTCCG;CCGGAGGTTCACGACCTCCG	-2.97;-2.65;-0.84;0.91
Islr2	0.190387	CACCCGTAAGGACGTTGAGT;ATGGTTAGACACATAGCGAG;AAGATTACGGTACTAAGGCG;GCAGCGCGCTCAAGTTACGA	-0.08;0.04;0.38;0.42
H3f3a-ps2	-2.71441	ACTGCCCGCAAATCCACCGG;CTCGCACCAGACGCTGAAAG	-3.39;-2.04
Plxnb2	0.538507	TGACGTCAAGAAGATAACTG;ACCGTCCATCCGTATCAGCA;GCAGTACTACGAGTGTCGGG;TTCTCACGGACTTTATCTAG	0.07;0.31;0.87;0.9
Plxnb3	0.401722	GTGCCCATCTATGTAACCAG;GGGCACCACTAGGCCTACTG;GGGGTGGTACAGACCACATG;GGACGAGTGATTCGAGTCAG	0.03;0.09;0.62;0.86
Cdcp2	-0.128277	AAGTCTGTACCCCTACAACA;CTGGAATACCATGACACCTG;CTGAGGCGCGGATCAGCCAG;GCCCACGGGCACCACTACTG	-1.66;0.07;0.44;0.63
Nars2	-2.43288	TCAGTCCAAGAGGCAAAATG;GGAACTCTTCAAGGCGACCA;CTCAGGGTCCAGGACGCGAG;TCACATCCAACGACTGTGAG	-3.1;-3.1;-2.43;-1.09
Dnaic1	-0.117711	TTCACAGGAGTCTATCAAGG;CTGTACCTGACAATATTCTG;GACTTCATGAAACAGAGCCG;GGGCTACTATGATGGCAACG	-1.03;-0.76;0.62;0.7
Fam45a	-0.225385	CTGTACTGACCAAAGACGAA;AGGATAACACCACACCCACA;GAAGGTGCATGTAAGAATGC;CCTTCACTAGGATATTGTGT	-0.97;-0.51;0.15;0.43
Kazn	0.180009	TGACCAAGGATGTCCCCAAG;AGAGCCAAAGAAGCCTTGCA;CGGAGCCTGCAAGCTATGCG;GCTTCGGCATCCAGCCCGGT	-0.25;-0.23;0.12;1.08
Psmg4	-2.54464	TCAGCCGCATGACATGAAAG;GCATCTACGCAACCTCGCAG;ACTTCTGATACAACTTCCAC;CGACACGTCCGCGTCCGCAG	-3.77;-3.23;-2.94;-0.24
Psmg1	-1.76829	AGTCAAGTCTCACATACCGA;GATGTGCCGGCATGTGAGAA;CACACAGAAAACATCTGTAG;GAGCAGGCGGGACACGCCGG	-3.04;-2.24;-1.78;-0.01
Psmg2	-1.48304	ACTCAGAATCGCTCATCTCA;AACGAACTTTACACTCCTGA;GGTGTAAGCAGATACCGGAA;CATCGTTGCGGTGATACGAA	-2.48;-2.36;-1.0;-0.09
Psmg3	-2.20416	CGTACCCATCTTCCCGAACT;GGGTCACCACAACTAGGATG;CTGCCCGAGGAGGACTCTCG;GGTGTGCGGTGTGCCCACCC	-3.78;-3.37;-2.46;0.79
Trpv5	0.302444	TACAAATGGCTCACACAGTG;TGTTTGTCCAAAGTAGCGAG;GTGTGAACTTCGATGGAAGG;AGAAACGGAAGCGCATCCAG	-0.17;-0.04;0.39;1.04
Trpv4	-0.0868208	GGTGTACAACAGCAAGATCG;CTACCCTTACCGGACCACAG;TCAGCACATCATCCGACGTG;CTCACAAGAAAGCTGACATG	-0.93;-0.32;0.41;0.48
Trpv6	-0.704381	TGTTACTACCAAGAAACGGG;TTTGGACAGACCATTCTCGG;GAACTTGTGCCAAATAACCA;GCTCAAGTTTGAAGGATGTG	-1.5;-0.94;-0.47;0.1
Trpv1	0.0589234	CCTGCGATCATAGAGCCTTG;AAGCCACATACTCCTTGCGA;TAAGCTGAATAACACCGTTG;GCTCCACGAGAAGCATGTCG	-0.25;-0.15;0.01;0.63
Trpv3	-0.156476	CACCAATGTAGACACAACGA;AGGATTTGAGCCCAACCCCA;CGTCAATGCTCACGCCAAGG;CATCCAATCCCAACAGTCCG	-0.61;-0.27;-0.17;0.42
Trpv2	0.241772	TGCACCGATGAGTTCTACCG;TGACAGCCTTCTCCAAATGG;TTTCCCGAAAGTTCACCGAG;CCGTGACCGACTCTTCAGTG	-0.25;0.12;0.5;0.6
Gm5445	-3.74439	ATGCCCCATAAGTGCTACCA	-3.74
Gm5449	-3.04587	GACTGCGTGAGCACTGAGAG;CAAGAGTGAGATGACCCCAG;TGTGAAGGAGATGTGGACTG	-3.29;-3.17;-2.67
NO_SITE_163	0.162132	GGCAGCCTAATCAGTCGAGG;GGCCCGAAGGGTCACAAGCG;GGCCCAACGAAACTAGCGTG;GGCCAGTGTGGCCGTTACGC	-0.32;0.05;0.35;0.57
Gm7353	-1.06806	TTCCACAGGCTGATTCACAA;AAAACCATCTTACCCAGCGA	-1.3;-0.83
Gm7350	-2.03874	TGATTCAGATGAAGAAGAGC;GAAGAGCAGGCTCATTCTGA;TCATCTGCTTCTACGTGAGG;AGACATGCATGAGAAGTCCA;GAACAAGAAAAATCAGTGGT;TGTTGGATAAATCTGGAGGT;CATGCATGAGAAGTCCATGG;TAGAAGCAGATGAAAATATA;GTGTGAGCAGAAGTTTGATA	-2.68;-2.65;-2.58;-2.37;-2.03;-1.95;-1.93;-1.71;-0.44
NO_SITE_165	0.125982	GGGACGCTCATCGAGTGACG;GGGCCGGCACTCTGTCGGAC;GGGCGCGTCATAGACACACG;GGGCAACGTCATCTGGCGAC	-0.7;0.02;0.17;1.01
BC061212	-0.637731	GTGATGGAGAGGGACCCCAA;TCCTTCGCAGATATGCAAGG;TGACAAGAGAATCTCACCCC;TTTCTCATCTGCCATAAGCA;ACTGTAGGCTTCTCATCCAA;ATGCTTGTGTTTCATCATGG;ACTTGATTATCACGCACCTG;GGTGCTTGATGACACCCTTG	-1.41;-1.31;-1.21;-0.9;-0.61;-0.19;0.07;0.45
Fnta	-2.13889	ATTCCACTAATACTCGCCTG;GAATGACGGCCCTAACCCAG;TGCCTGGCAGCATCGACAGT;CAGAAACCCGTCGTCCATAG	-2.84;-2.73;-1.85;-1.13
Fntb	-2.50786	TACTCCCTAAAGCAACCCGA;AGGCATCTGTCAGTTGTCGA;TCAGGTCTCAGACTATACAG;CACAGAAGGTGTAGCCACCG	-3.95;-2.53;-2.12;-1.44
Zfp474	-0.110135	ACATTAGAACTACCCATGCT;CGCCACTTCTCCAAGCACTG;CTGCTGCCCTGTGAAAACTG;CCCCTGTGATCCCATCCCGC	-0.92;-0.55;0.12;0.91
Zfp473	-0.442069	CAATAAAATCCACACCATCG;TCTACGAAACCACTCTGCAA;CAGCGACAAGGAAAGCCCCG;GTTAAAAGTCCTGGCACACA	-1.64;-1.22;0.48;0.61
Zfp472	-0.876123	CACAGCTTCACAAACATGAA;GAAGAGTACCAAAATCCTAA;ATCGGTAGTGAAACTCCTAG;GAAACATAAGAACTGTTGGA	-1.59;-1.15;-0.61;-0.15
Nutf2-ps2	-3.54079	TGATGCATCATGCCTTACAT;AGATAGCTGCATCATCAGCA;GGGAAGGACAGCAGTTCCAG	-3.84;-3.57;-3.22
Nutf2-ps1	-2.94294	TGATGCATCATGCCTTACAT;AGATAGCTGCATCATCAGCA;GGGAAGGACAGCAGTTCCAG;GTAGTAATGTTGAATAAAGC	-3.84;-3.57;-3.22;-1.15
Apbb1	0.221008	AGGCTGGGTAGAGATGACCG;ATCGTCAGCATTCGTGTGTG;TCCCAACAGGGACCACCCAG;AGGACAATGTCGCCTCCTCG	-0.66;0.39;0.52;0.64
Ceacam19	0.183962	AGATAGTGGCACCTATCAGG;AGTGCTGGGAACACCGTGAA;CTTATATCCCCGGACTACCA;ATCACTCCTAGGTGCACGCG	-0.02;0.12;0.29;0.35
Ceacam18	0.121704	TTCTCACGTCCACTGTACGA;CATCCGGGGAAATCGTCATG;ATGTCGGCGGTAAATGACAC;TGAGCTGATTCAATTGACTG	-0.93;-0.15;0.62;0.96
Ceacam15	-0.446479	ACCTCCAGCTCAACCACACT;TTACAAACCTTTAAAGCACA;AGGGAAGAAATCTATAAGGA;AGAGTCACTTACTGTATACT	-0.97;-0.92;-0.1;0.2
Ceacam14	0.561298	GCTTCTTGTAACCTAAAAGT;GCTATCAATGCTACTGTGAT;AATTGCGTTGGTGCCACCTA;ACTCAGGATACTACACTCTA	-0.27;0.8;0.81;0.91
Ceacam16	0.0509096	TATCAAGGCTGCCATCAGGA;AATGTAACTGGCCACCAGGA;AAAAGCTGCCAGGAATCCTG;TAACAGGCAGTTTCAGACGG;ATGACCTCAGGGCCAACATG;GGTATCCAAGGTCTGAAGGT;AGAGGGGGACAATGTCACGC	-0.6;-0.4;0.05;0.19;0.29;0.32;0.51
Ceacam11	-0.0846289	TTCTCAACTCACAATTAAGT;GACAGCTACCAATTCTACTG;ATGGTGATCTGGGTGGTAGT;GCTATCTTAAAATGGTCAAG	-0.84;-0.1;-0.06;0.66
Ceacam10	-0.439376	ACTGGTACAAGGGAAACAGT;CCATTAATAGGAGTAAAATG;ATTGTTGTCTGCAGTAACGT;TGCGGCCCAACGTTGCCGAA	-1.18;-1.16;0.15;0.44
Ceacam13	4.81975e-05	AGAGAGACAGTACTCAACAA;ATGGTGAGATGAGAAGTAGT;AAAGACTGCACCTCTTGGCA;GCTTCTTGTAGCCTAATAGT	-0.34;-0.12;0.22;0.25
Ceacam12	0.516696	GCTACCAATTCTAGTGTGAT;AAATTGAGTTTGTGCCACCT;AATAGTTATCTGGGCAGTAG;ACGCATTATTTCACGTCTTG	0.25;0.46;0.63;0.72
Gm30927	0.693123	ACAACCCAGTAAAGCCATTG	0.69
Gm6408	-0.878449	GAACAGCAGCTGGAATGTAG;GGGACTCATAAAAATCCTTG;GGCCATTGGGCTAAACCCTG;GGCTTGGGTATCTTCGTCTG	-1.4;-0.87;-0.8;-0.44
Gm34620	-0.176678	GGTTGAAGATCAGGTCTCCG;GGATGTCCAGAATCACGTAT;GGGCTGTGCTGTAATCGACG;AGGCCTCTACTATACGCCGG	-0.81;-0.38;-0.07;0.55
Gm21992	-0.121608	CACACTCGATGACGCGTCCA;TTGTATTACAACAACACGTA;GCTCTTGGTTGGTACAAGTG;GCTCGGTCAAGTCTGCCACG;CAGAGCGGCTGCTATCGGTG	-2.36;-0.55;0.21;0.84;1.24
Gm21996	-1.47015	TCACATAAAGAGAAAATGGA;TATGTCAAAGAATCTTTCAA	-2.2;-0.74
Mrgprb3	-0.507008	AAAATATAGAATGAGAACAC;TATTCAGTACCATCCCAACA;TAATGATGGTGGTAATGCTC;CTGATGTGTGTCTTGGACGT	-1.05;-0.6;-0.34;-0.03
Mrgprb2	-0.962183	GGCACAACATAAAGAACCAA;CGTTTACAGCGATACCAAAT;ATTTAGTCCCATCCCAACCA;AAATTACAAACTGAGAGCAC	-2.5;-1.35;-0.3;0.3
Mrgprb1	0.0126054	TGAGGATGCTCAGACCACTA;GGCTTCCTATATTACACTAG;TGGACTTAGTCATCCAAGAC;GGTACCGCTGCCAACGCCCA	-0.47;-0.36;0.43;0.45
Mrgprb5	-0.743015	GTAAGCAAACATAAATACAA;ACTTATAATATTATTAACTG;ACTGTTGAATTTCCTATTAG;ATGATGGATGATGTATGTCT	-2.11;-1.36;0.08;0.42
Mrgprb4	0.302668	AAGCAAACATTGTTACAATG;TGTTGGTGAAGATTGTGTGG;TAGGCAGCGTTCAGCACTGA;CACAGCCTAGCCCTACCACG	-0.33;-0.19;0.3;1.44
Vmn1r107	-1.5626	CACATTCCAATTAAGGTCAC;GAGAAGTACCATGGAGACAC;CTGATGAATACTCAGGACAC;CAGTGACCTTAATTGGAATG;TCTGGTCTCAGCTTGGCCTC;ATGAATACTCAGGACACAGG;GAGGAATAGAGTCAAGGCAT;CAAATGTGACCACCAGCATC;TTACCTTTACCTCTATTAAC;AACAGTAAGGGGCAGATACT;TGCTCATGAATGTGGCATCA;AGCACAGAACAAGGATCTTT;TGACAAACTGATGAATACTC;GTAAAACCAACAACTGTAGC;TTGGCCTCTGGCATCCTGAT;ATTAGATTTCTTCAGTCACA;AGATTTCTTCAGTCACATGG;AATTTACATTTGAGTTCATT;GAGCAAGTGTCCCAAATTTG;…	-3.21;-3.17;-3.03;-2.36;-2.27;-2.25;-2.23;-2.23;-2.15;-1.74;-1.37;-1.28;-1.21;-0.98;-0.88;-0.85;-0.49;-0.35;0.31;0.44
Vmn1r104	-1.34055	CACATTCCAATTAAGGTCAC;GAGAAGTACCATGGAGACAC;GCCTACAATGAACCCAGAAG;CAGTGACCTTAATTGGAATG;CTGATGGATACTCAGGACAC;TCTGGTCTCAGCTTGGCCTC;GAGGAATAGAGTCAAGGCAT;TTACCTTTACCTCTATTAAC;AACAGTAAGGGGCAGATACT;TGCTCATGAATGTGGCATCA;AGCACAGAACAAGGATCTTT;GTAAAACCAACAACTGTAGC;TTGGCCTCTGGCATCCTGAT;TGAGGATGTGCTGCATTTGC;GACTCTAAAAGCAACTTGTT;AATTTACATTTGAGTTCATT;GAGCAAGTGTCCCAAATTTG;TTCTGGGTTCATTGTAGGCA;ACTTGTTCGGTTCCACTTCT	-3.21;-3.17;-2.39;-2.36;-2.3;-2.27;-2.23;-2.15;-1.74;-1.37;-1.28;-0.98;-0.88;-0.42;-0.36;-0.35;0.31;0.6;1.04
Vmn1r103	-1.45537	GAGAAGTACCATGGAGACAC;CTGATAGATACTCAGGACAC;GAGGAATAGAGTCAAGGCAT;CAAATGTGACCACCAGCATC;AAACAGAAAGACATTGGCCA;TGAGGATATGCTGCATTCGC;TAACATCCACATTTCAATTA;GGCATCATAGGCAAACTGCA;AACAGTAAGGGAGAGATACT;AGCACAGAACAAGGATCTTT;TGCGGTACTGATTGGGAGTG;CCAGTTTGGGGTTGGGACCT;CAGTGACCTTAATTGAAATG;CCCTTACTGTTGATCTTCAG;ACTCTTGTTCTTGTTAATAG;GCAAAAGCTATCATGTTGTT	-3.17;-2.24;-2.23;-2.23;-2.12;-2.08;-1.84;-1.59;-1.32;-1.28;-0.91;-0.86;-0.59;-0.55;-0.43;0.14
Vmn1r101	-1.60254	GAGAAGTACCATGGAGACAC;GGTCTGGGCCAGTGTCTCCA;CTGATGGAAACTCAGGACAC;ATGGAAACTCAGGACACAGG;TCCACTTCTGGATTCAGTGT;TCTTGCCACCAGGTGACTGA;GAGGAATAGAGTCAAGGCAT;CAAATGTGACCACCAGCATC;TCTGGACTCAGCTTGGCCTC;CTCCGGTTCCTCTTAATAGA;CATCATAGGCAAACTGCAAG;TTGGCCTCTGGCGTCCTGAT;TAGAGCAAGTGTCACAAACA;TGGCCTCTGGCGTCCTGATT;GTGTTATTGTTTGTTATCTG;GAGTTCAGTTGGAGGTGTTT;GTTATTCTTCTTACAGTTGT	-3.17;-3.11;-3.01;-2.74;-2.56;-2.46;-2.23;-2.23;-1.89;-1.49;-1.48;-0.86;-0.63;-0.54;-0.02;0.13;1.04
Vmn1r100	-1.46772	ATGGACACTCAGGACACAGG;GAGAAGTACCATGGAGACAC;CAGTGACCTTAATTGGAATG;TCTGGTCTCAGCTTGGCCTC;GAGGAATAGAGTCAAGGCAT;TTACCTTTACCTCTATTAAC;AAACAGAAAGACATTGGCCA;CCACGGTCCCAATCCCAAAC;AACAGTAAGGGGCAGATACT;CAAGAATAATTCGCAAAATT;TGCTCATGAATGTGGCATCA;AGCACAGAACAAGGATCTTT;TCCCAAACTGGCAAAGCAAA;TTGGCCTCTGGCATCCTGAT;TGTGGAACAGTGACCTTAAT;CCAGTTTGGGATTGGGACCG;ATTATTCTTGCTACAGTTGT;GTGTTATTGTCTATTATCTG	-3.24;-3.17;-2.36;-2.27;-2.23;-2.15;-2.12;-1.82;-1.74;-1.39;-1.37;-1.28;-1.09;-0.88;-0.59;-0.27;0.51;1.02
POTENTIALLY_ACTIVE_11	0.553336	CTATTGGGAGCGGCCTCTCG	0.55
POTENTIALLY_ACTIVE_10	-0.21137	CCTGGGAGACACAACCGCCA	-0.21
POTENTIALLY_ACTIVE_13	0.0493098	GCAGCAAATCCAAATCTCAG	0.05
POTENTIALLY_ACTIVE_12	0.536804	GAGGTAAGGCTTGCAGTGAG	0.54
POTENTIALLY_ACTIVE_15	1.05752	GCTCCGGTGGATGTCGCATG	1.06
POTENTIALLY_ACTIVE_14	-0.350559	GCTAAACGTATTTTACGGGC	-0.35
POTENTIALLY_ACTIVE_17	0.981585	GGTCTCAGCGGCCGGGACTG	0.98
POTENTIALLY_ACTIVE_16	0.358417	GGCTCAGGCCCATCCCGCTG	0.36
POTENTIALLY_ACTIVE_19	0.258219	TCATGGCGCTGAGAATCTTG	0.26
Gm3150	-0.0430691	TTTCAAGTCTGCAGCTGCCT;GGTCCAGCAGCTCCGGCTGG	-0.77;0.69
Crhr1	-0.326284	GGCACTCAGAATAATTCACA;GAGCTGGACCACAAACCACG;CCTGCAGTGCAATGCCTCCG;GGTGGAGTACGTGAGTACGA	-1.15;-0.59;-0.44;0.87
Adam29	0.0291496	TGCAGTTTGACATGCAACAA;AGTCACCCTCCACATAACCT;AAGTGGCATAGGTTCCACTG;AATTGTTGAATTAGTAGTGG	-0.55;-0.15;0.32;0.49
Rffl	0.0706848	TTTCCGTAGAGATGTCGTGG;GCTTGCGAAATGGACCCCGC;CATGACTTGTTCGAGCCAAG;CACAGCCAGAGTACCTACTG	-0.6;-0.11;0.37;0.61
Izumo2	-0.0443762	ATAAAGGCTAACTCTAAGAC;ATGCAATGAACGCTTTCGTG;GCAGGCAGCCCCATGCCCCG;CCAAGCGCTTCCATCTGGAA	-1.07;0.02;0.39;0.48
Adam28	-0.096925	CCTACGCACAATCAACCTGG;GATGGCCAATTACATCAACA;TCATACATACGAGATTAGCT;CACCTGTCAAGGACTACGGT	-1.0;-0.37;0.39;0.6
Gm9008	-0.186617	TCTTTGGAGGATGACAGACG;GACTAGACTGTTGATCACAT;AGCCGGGAATTCCTGAATCG	-0.9;-0.32;0.65
Gm9001	-0.458329	ATGAATGGAGTCAAGTGGAG	-0.46
Gm9002	-2.4626	CCAAAGTTCTTCACACGCAG	-2.46
Lipt2	-1.36771	CCGAAGTTCGCACAGTCGCA;TACACGGGCGGGCTACGCGG;CAGACGCCAGTGTAGGGCGG;ACCCGCTTTGGTCCCCGACA	-2.01;-1.97;-1.75;0.26
Tti2	-1.50346	CGGGTCCTGACATGTGACGG;CAGTAACCACAATGTGATGG;CGGCTTCTATTAAAGCGCCG;TAACACTTCATGACAGTGTG	-2.48;-1.35;-1.33;-0.86
Lipt1	-1.63733	TGAAGTTCTGATGAGTGCGG;AGTCCGGCCGATCTTTGATG;GGTTGATGTTACCCATGTCG;CTGTAAAATGAGCCCATGTG	-2.63;-2.38;-1.67;0.13
Ss18	-0.12543	GTCTTACTGCGAGCACTCCG;CTGATGGGCCAAGTTAACCA;ATTGGCATAGTCTGTGTGGG;TCTGGGATGACGGCACAGAA	-0.67;-0.47;0.17;0.48
Smarce1	-1.68904	AGAGTGTGGTACCTGATGTG;GAATACGAAGCAGAAAAGGT;ATGAGGTACAGCAGAAAGGT;CAGCCTGCTGAGGATCCAGA	-2.06;-1.6;-1.55;-1.54
Ghsr	-0.413807	GCTCGACACCCATACCATCA;CAACCTCTACCTATCCAGCA;CACCACGAAGAGCGCCACGC;CGGCACTCGTTGGTGTCCCG	-0.93;-0.65;-0.53;0.46
Gsn	0.0457375	TGCAGCGTAGCAGCATCGAA;CCTCACCCAGCCAATAGTGG;CTGTACAACTACCGCCACGG;GGCATCTGGATTCAAACACG	-0.18;0.02;0.04;0.3
4930529C04Rik	-0.534029	ATTGTACTGCAGGAGAACGG;GAAGGAAGCTGAGAGTGGTG	-0.56;-0.51
Gm7438	-2.05577	TTCAGATGAAGAAGAAGAGC;TAGAGACACCAATGGAAAAC;GAAGAGCAGGCTCATTCTGA;TCATCTGCTTCTACGTGAGG;ACGTTCTGTAGAGACACCAA;ATCCAGTAACTCATGATGAT;AGACATGCATGAGAAGTCCA;TGTTGGATAAATCTGGAGGT;CATGCATGAGAAGTCCATGG;TAAGTGGTGAACAGCAAGTT;TTCCCATCATCATGAGTTAC;GTGTGAGCAGAAGTTTGATA	-2.92;-2.73;-2.65;-2.58;-2.57;-2.44;-2.37;-1.95;-1.93;-1.26;-0.82;-0.44
4930579C12Rik	1.09547	CTTCTCGCACCTTCTGCGTG	1.1
Fam186b	-0.436281	CCTCATGTTAAAGCACACCC;GACAAAGTACAAGTACCTGC;CACACAATGGGAGAAACTAG;GTACGACCTGCTCTGATGCG	-1.83;-1.38;0.43;1.03
Fam186a	-0.595667	CTGACCTCTTCAAAACACTC;ATTTACCAAACTTCAGCGGC;CCCAGCTTTAAGAAGATACC;CTATAGACAAGCTTCAGTGG	-2.54;-0.89;0.15;0.89
Lrrc75b	-0.0319982	GGACACTCGTGGTGTAGAGC;CTGCCGACAGATCTTGTCCG;CTTTGTCACCTATAGGACCT;CTCCAGAAGACTCTGCTGGT	-0.83;0.1;0.22;0.39
Mmp8	-0.0797992	GTCTTCGAGGAATGCCACGA;GTACCCAAACTATGCTTACA;AGTTAGATGCAGCTACAATG;TGCTACTACCACACTCCGTG	-0.56;-0.46;-0.27;0.98
Mmp9	-0.13345	ACAGCTGACTACGATAAGGA;GTCAGTGTCGAAGTTCGATG;GTACCGCTATGGTTACACCC;GCGTCATCGATCATGTCTCG	-1.17;0.05;0.27;0.32
Mmp7	0.0217585	GATCCCACTGAACTTCAAGA;TGTTCCCTGGCCCATCAAAG;ATTTGATCCACTACGATCCG;ATAATGCAGAAACCTAGGTG	-0.99;0.21;0.43;0.44
Mmp2	0.266062	CCGCTGGTGTGGCACCACCG;ATGATCAACTTTGGACGCTG;CTTCCCCCGCAAGCCCAAGT;AGGATATAGCCTATTCCTCG	-0.2;-0.07;0.53;0.79
Mmp3	-0.491775	ACTTTGACGATGATGAACGA;GGGACTCTACCACTCAGCCA;AGGTTCCAGAGAGTTAGACT;CCCATTGCATGACAGTGCAA	-1.0;-0.71;-0.23;-0.02
Jmjd6	-0.319424	TGAATCCCAGTTCCAGAACG;TAGTTCAGGGTCACAAGCGG;AGTTCGTGGAGCGCTACGAG;CTGCTATCGAAGATGTAAAG;GAGGCCGGGCTCGCACGTAG;CGGGAGGAGCCAGTTCCCGG	-0.91;-0.83;-0.43;-0.24;0.19;0.3
Jmjd7	-0.23082	AGGAACACCTTACCTTAAGT;AGAGCATTTCGGATAATGCA;TGTGACTCCAGATGGTTATG;GGCGTTGCAAGAGTTCCCGG	-1.2;-0.63;0.45;0.45
Jmjd4	-0.126206	GTCTTCCAAGTCATTCACCA;TCCAGTAACTGATATAGTCG;CGAGACCCAGTCCCTAGCGG;AAGGCGCTAGAAAACACGCA	-0.74;-0.07;0.13;0.18
Jmjd8	-0.10118	ATGGTGGCGGAGAGTAGTGC;GGAGGAGGAGCGTTGCACAG;GCAAGGACTCACGGACAACT;AAACCTGCTAGCCTCGTTCG	-0.3;-0.25;-0.14;0.28
Susd6	0.44557	GCAGTACAAACAGCACCACG;TGACCTGCAAAAATGGCGAG;TCTGATCCAGGCGTGAACAG;AAGCCACTATGGACAGCGCA	-0.01;0.25;0.52;1.02
Susd4	-0.158822	TATCCCATGTCCCATCGTCA;CGAAACAAGACGTACAGACA;CGAAGAAAACTCCTCCGCTG;TAAGGTTGTGTAAGCACTCG	-1.53;0.21;0.32;0.38
Susd5	0.238658	ATGACACGGATCTGTCATCA;AAGTCTCGGCCGGAAACCAG;AGAGCATTGTACTTAGCACC;TCAGTGGGACCGGATGAAAG	-0.3;-0.14;0.49;0.91
Susd2	0.236707	GGCCGGCGCTTCATATAACG;AAGTGAAGAAGCCGGTATTG;AGTGCCGTAGTATTGCCAAT;CTGCCCGGAAGTCGTCACCC	-0.26;0.24;0.36;0.61
Susd3	0.25503	GCTTCCTGAAGACCAGTCAA;ATCTCCACGGACGACTTGCA;TTAAAGCCGAAGGTCTCATG;AGTGTGTGCAGAAAAATGAG	-0.13;-0.02;0.15;1.01
Susd1	0.182508	CCTCCCAAGTTACATTGCCA;TTATCGTGTAATCAGTAGCG;CACAGAAAGTGCCGTCATTG;ACGATGTGGCATCCGTGCGT	-0.58;-0.05;0.51;0.85
Capza3	-0.349672	CCTACTCCAGAATCAACTGA;CGTTTCTAACCCAAGTCACA;GGGTTGCCGTCGATGCAGAG;AAGCAGACAGAGATCGTCAA	-0.98;-0.58;-0.56;0.71
Capza2	-0.518375	AAAACCTCATTAAATTCTCC;TGCATTTGCACAGTATAACC;AAAAGAGCATTATCCGAATG;GAAAGGAAGCAACTGATCCA	-1.28;-0.91;-0.34;0.46
Capza1	-0.506266	TTTACGCTAAAACTATAGAT;TAACAATGACAATCTCCTCA;CATTACACCACCTTCAGCCC;TGATGAATTTAGCGGCTATG	-1.48;-1.09;-0.07;0.62
Paox	-0.247194	CTTCACACTCCACCAATACG;TGCAGAATTCGGGCTCCTGG;TACCGAAGCAGCGTTCCGAG;TGGGCAAGGAAGCCAGTATG	-1.02;-0.73;0.13;0.64
Ctsc	-0.215769	TCACAACCACAACTTTGTGA;CTGTATTTCATCAGTCATCG;CTGCAAGATACAACCTCCTG;GGCAGTAACTGATAGCTGTG	-2.36;-0.42;0.96;0.96
Radil	-0.00724335	CTCAACCAGGTCCTAGACAA;CTGGTACAGCGAGTAACGCA;ATGTGGAAGAGCTTGCATCG;GAAATGGGGGGCATTCCAAG	-0.4;-0.04;0.05;0.37
Dlst	-2.16643	CTCCTGCAAGGCGAACGCCG;GGTTCGCTTCTTCCAAACCA;AATGCTGACGACTTTCAATG;GCAGGGGTCTCCTTATGTCG	-2.96;-2.4;-2.03;-1.28
Mrpl54	-1.17641	GCTCACCACACATGCCATGG;TGGGGTCTGTGCACACCTCG;CTGAGGACCGGGAGCGCCCG;ACCTGGAGGATTCTCTATCC	-3.49;-1.04;-0.56;0.38
Mrpl55	-2.00456	CCTGCTTGACCAAGAGCACA;CCGGTATCGGATATGGATAG;CTTACCGCCAGCATGCGTCG;CACAATGCCTCAGCAGGCTA	-3.18;-2.92;-1.33;-0.59
Mrpl57	-2.76349	CTCCTTCGCTTGGAAAGACA;AGTGGATCGGGAAGCACCGG;GAGCATGATCCGTCGCCTGG;AGGGCATGCTGAGCCAGTAG	-3.28;-3.25;-2.37;-2.16
Gm34826	-2.18115	GGAGGCCTGGGCTATGGCTA;GGCTATGGCTGTGGCTATGG	-2.2;-2.17
Mrpl51	-1.65116	TTTGGCGTCTACGACAACAT;AGAGAAGCTTCGGCATGCCG;AGCCTTACGAAGGCCAACCG;TGATCGCTGGAACGAGAAGA	-2.38;-1.66;-1.65;-0.91
Mrpl52	-2.66368	CCAGTCAGGGAGCTCCGTGA;ACATCAAGGCTCACCCGCGA;GAGATTGCACTGCAGCGTAG;TCGAAGTTGGCCTTTCATTG	-2.97;-2.96;-2.64;-2.08
Gm34825	0.132831	CACGTAGAAGGAATCCCGCA;CTCCGACTTCAGACCCGTAG;TCCCGCAGGGAGGAACCGAG;GTAGAAGGAATCCCGCAGGG	-0.22;-0.15;0.01;0.89
Sod2	-2.81191	GGCGTTGAGATTGTTCACGT;CCTGCACTGAAGTTCAATGG;ATGATCTGCGCGTTAATGTG;ACAAACCTGAGCCCTAAGGG	-3.1;-3.1;-3.07;-1.98
Zfas1	0.0919598	CTGGGCAGCAGGAACACATC;CAGACCAACACCTGCATCCT;GAATGGAGCGTGAACTCCTG;GCATTCTGCATAGCCTTGTG	-0.28;-0.06;0.27;0.44
Sod3	0.72744	GGAGCTAGGACGACGAAGGG;GCCGCACTACAACCCGATGG;AGAACCAAGCCGGTGATCTG;GGTCCCCGAACTCATGCACG	0.54;0.59;0.59;1.19
4930407I10Rik	-0.089205	AATTCCCAAGGGCTAAAGTG;TGGATGCAGAAGCGGCGATG;CAGAGCCCGTTAGGTGATGT;GAATGTATGCTCTGGCACAA	-0.4;-0.17;0.05;0.17
AW209491	-0.230213	AAAATGCAAAGACAATGTGA;GTTCTCTGCCGATTCCACGA;GGTCAAAGCCATCGGTCGAA;GTGTCTGCCATGAGTTACGG	-1.84;-0.65;0.63;0.94
Grhl3	0.0669253	ACCCTTCACTCCCTTCTGCG;AGTGACTTTGAATACACCCT;CTCTACGACTACTATATGGT;GGTCGTGTTCGATAATGACA	-0.73;-0.08;0.43;0.64
Nfyc	-1.65429	ACAGAGGAATGATATTGCCA;TGTCCAGTACTACTTCACGC;AGAAATCCGAAACTTAACAG;TCACAGACCTGACCCTGCTG	-2.61;-2.51;-1.82;0.32
Nfyb	-1.58052	ATTTATAAGCTTCATCACGT;GAAGCGGAAGACAATCAATG;TTCCAATTGCAAATGTGGCT;ATTTCTGCAGACTACATCGG	-2.83;-2.62;-0.77;-0.11
Nfya	-0.813141	ACACAACCAGCAGTGGACAA;GGACAGATCCAGATTCAGGG;TTAATGGTGCAAGTCAGTGG;TGCCATCTGCATTAACTGGT	-1.62;-0.71;-0.67;-0.25
Cyp1a1	0.20781	GTGCTCCTCCAAGTAGCAAG;GTACCTGGTAACCAACCCTA;GGTCATCATGGTCATAACGT;AAGAGTTAGGCAGGTAACGG	0.02;0.03;0.05;0.73
Cyp1a2	-0.635611	GCACTACCAAGACTTCAACA;GAACATCGTGAATAACAGCA;CTTCGAACCAGTCAGCCAGG;CAATGGCGGTCTCATCCCCG	-1.79;-1.15;-0.13;0.52
Gpr119	-0.300619	TGCCATCCGAAGGCTACACA;GAAGTCATTGACAGACCGTG;TCATGATCTGGAAGTAACGG;GGAATATGGAGACTCCGAGT	-1.25;-0.13;0.03;0.15
Il1f10	0.00655608	AACATCGAGGACCTATACAA;CCGAGGCCTAGACCGCTCCA;ATCAAAAGGCTTTGTACACA;GGCGTGTGTAAAGACAAGAG	-1.0;0.29;0.34;0.4
Skil	0.167052	GCTGGAGTGAAAATTCTCGG;GGTCAACGTGATCAGCCCAC;CCTACAGACAGATACACCAT;TCGGGCTGAACATAAAACTG	-0.3;0.06;0.22;0.69
Gca	-0.0670361	AACCGTTAGAGAGACTACAC;AGCTGTGAAATAAGTCCACA;CCAGGCATGCAAATGCAGAT;CTGCTTCCAGGCATTAAGAG	-0.94;-0.02;0.12;0.57
Gabpb1	-1.26807	AGAGAAATGCCCATACTGTG;GTTCATCATTGGACCCGGAG;CGTAGCTAATACTGACGTAG;CAGTGGTGTCCGGTCCACTT	-2.22;-1.42;-1.3;-0.13
Rdh11	-0.548678	CCGGCAAGCTAAATACACAC;GCACCTTCTCATCAACAATG;GGAACAGTCAGGTCTTCGTA;TCCACTTCCATAACCTGCAG	-1.94;-0.54;-0.05;0.33
Gck	0.128059	AAGGCACGAAGACATAGACA;CCAGATGTATTCCATCCCCG;TTCTGGGGTGGAACGCACGT;CCATCCGGTCGTACTCCAGG	-0.37;-0.26;0.52;0.62
Thrb	-5.67653e-05	CATCTTTGTCTAAATAGCTG;CCCATCGTGAATGCCCCAGA;CAGGTTTCCAGGGTAACTAC;GAAGACAGTCCGGCTCTCAG	-1.16;-0.56;0.61;1.1
Thra	-0.181312	AAAACTGCCCATGTTCTCCG;TGTCACTCTCAGGGTCGTAG;TCTAGATGATTCGAAGCGGG;ACAGCGGTAGTGATAACCGG	-0.43;-0.2;-0.06;-0.03
Vasn	0.368626	TATTGCCCAGATACGGCCCG;AGACCTTATAGTAGGTACTG;TGGGGCAGTCGATAGTACGG;ACATGGTTCTCACGCACCCA	-0.12;0.18;0.54;0.88
Eri2	-0.832701	GTTGCTTAATGAAAATTACC;AGAAAACCCAAAGGACTGAG;ACTTGCAACATGAGTATCCA;ACATTTGTGTCACTAACAGG	-1.73;-0.84;-0.51;-0.24
Eri3	-0.200537	AAGTAGTGATACCTCTGGGG;AGCGCCGTTACAGACGGGAG;AGGCTGGACATACATGTGAA;TCCCACTTGTTATCTCCCTG	-0.37;-0.32;-0.22;0.11
Eri1	-1.10282	AGTACTGTATACTAACAGAT;CGGTCTTACTGGAATCACTC;GTCATAGTAACTGTCCCCAG;ATACGTTTCAGCAGTATGTG	-2.47;-1.42;-0.32;-0.2
Gm5127	-0.847449	AAGTAATCAGAAAAGCCTCA;TAGCAGCATGACATAGAGAC;GCTACCAATAAACACCGCAG;ATGATGATGACATTCGGAGA	-2.06;-0.51;-0.43;-0.39
Vasp	0.282619	AGGCATGGCCAACGCCCTAG;AGCACAGGGCCCCAATAGTG;AACTCGGAAGGAGTTAGCAG;ACCCGGCGCTCCATATGCTC	0.12;0.19;0.23;0.59
Gm5128	-0.2759	GAGGATCCTAGATTTAAGGC;TATACTGACAGCAATTGTGA;GTGGTTCATACGACTCAGTT;CCTACAGGAGCCCTAAACTG;GGTGGTTCATACGACTCAGT;ATCATCTTGAAACTGTCCTG;CAGTTTCAAGATGATCTGTG;AGTACTGATATCAGGACATA;GAGGGACAAAAAGCTCCCTT;GAGTCGTATGAACCACCTGA;TAGCTGAGTTCAGGGCAGGG;TGACAGCAATTGTGAAGGCT;TGAAGGCAGCAGTGAATAGA	-1.53;-1.35;-0.93;-0.8;-0.35;-0.08;-0.05;0.05;0.07;0.14;0.14;0.22;0.88
Chd1l	-0.0784124	AGTGGGCATGAACTTAACAG;CACCATCGAACAGATACGGG;AGAAATCGTGTATAGGAAGG;CAGGACTATATGGACTACAG	-0.49;-0.34;0.22;0.3
Gm45618	-2.75624	ACAGGCACACAGCAGCACAC	-2.76
Slc35c2	-0.0219562	CCTTCGAATATGGCAAAGAG;AGGTGGAACATGGTGTCAAT;GTATTTGTGTAAGGGTCCAG;CGAAGGCCAGAATCCCACCG	-0.36;-0.27;-0.22;0.76
Mafb	0.255829	GGTGTGACTCACGATGACCT;AGCTACCCACTAGCCACCCG;TGAACCGAAGACCCATCTCG;GCGTCAGGTTGAGTGCCTCG	-0.12;0.26;0.34;0.54
Slc35c1	-0.273437	CTCACCAATGATGACGCCGC;GCAGTGAGGTCACCAGGCAT;AGGGCACCCCTACGTACTTG;AGGTTAGGCGCCAGATACTG	-1.13;-0.16;0.02;0.17
Ss18l2	-3.07175	TCAATCAAGAGACAATCCAG;CCAGCTGATCCGCTGTATCG;TTCGCTCCTGACTGGCTACG;ACTGGACGCACTCGTTCGCT	-3.86;-3.09;-2.75;-2.58
Ss18l1	0.35799	CCAACACAGAACATGAACCT;ATCAACATGCAGTCTAACCC;TCTGCGAGGTAGGCCCCGAG;CTGTGCTGACGGTATCGCTG	-0.05;0.39;0.45;0.64
Mafg	-0.124747	AGGCGCACACTGAAGAACCG;GTTCAACTCTCGCACCGACA;GAGTTGAACCAGCACCTGCG;TCTGTGTCACCCGCTTGACG	-0.72;-0.21;0.19;0.24
Tesk1	-0.128104	CTCACAGAGGACGATCCCGA;CCGGAGCAACACGCTAAGGG;CTGGTCCGAAGGGAAGACCG;GCTCCCTTGACATACAATCA	-0.8;-0.1;0.11;0.28
Tesk2	0.199028	ACAGTGACTTGTATTTACCG;TGAAAACGGTTACTCTGCTG;GACAGCCAGATAGTACGTCT;TGCGGGCGATGATCTCGCAG	-0.08;0.23;0.32;0.33
Edaradd	-0.593595	AGATACGATCAGGATAAAGC;AAGTATCCCATTCAAGACAC;CCAGCCCTGTAAGGACGGGA;CTTCCCAGATCACATGGCAA	-1.49;-0.64;-0.39;0.14
Actn2	-0.445595	TGACTACTCAAAGCTTAACA;TGGGGGGCTTATGCTTACGA;AGCCCTACTTCGGAAGCACG;TCGCCCACAGAAATAGTCGA	-2.43;-0.45;0.48;0.62
Rb1	0.189582	AAATGATACGAGGATTATCG;TAAGTACGTTCAGAATCCAC;AGAGAAGTTTGCTAACGCTG;GCAGTATGGTTACCCTGGAG	-0.32;-0.2;0.58;0.7
Purb	0.0256925	AAGCTCATCGACGACTACGG;CCACCGCCATCGACAGCGTG;CGCCGCGGTTCACCGTCTGG;GGAACTCGCTCTTGAGCGCG	-0.82;-0.11;0.51;0.52
Pura	0.0102317	GGAACTCGCTCTTGAGCGCC;ATCCGCCAGACAGTCAACCG;GTGGAGTTCCGCGACTACCT;GCTCATCGACGACTATGGAG	-0.5;0.09;0.15;0.31
Purg	0.0173988	TCAAAACGGACTATATAGAG;TGTGCCCCCAGACTGATTAG;TAAACTGACCCTCTCCCTGT;ATTAGACAAACCATGATGCG	-0.27;-0.04;-0.04;0.42
Olfr237-ps1	-0.179531	AGGACATCACCACTAAAATC;TAGGCATGGAATGAAGGAGA;ACATGGGTGTGTGCAGTCTG;ATTCCAAGCTGACCTAGCTG;AGAGGAAACACTCCACAGCT	-2.17;-0.01;0.21;0.46;0.6
Cyp2a5	-0.180743	CACAGCACCACAATTCGGCG;CATTAGCTCAATTGTCTTCG;GTTCCCAATGAAGGGCAGTG;AGGCGTAGCCTTCAGCAGCG	-0.72;-0.41;0.08;0.32
Cyp2a4	0.342423	CATTAGCTCAATCGTCTTCG;GAAAACATCTCATAGACCTG;GTTCCCAACGAAGGGCAGTG;AGGCATAGCCTTCAGCAGCG	-0.03;0.16;0.5;0.74
Ufsp1	-0.0998336	GCTTTATTCACACTTTACAA;CTCTGCCTAGAACACTTCGG;CGGGAGCCCCGGAATCCGGG;TGGCAGTCCAGGCACGCCCG	-1.16;-0.38;-0.14;1.28
Ufsp2	-0.921441	ACCATGAGCAGATAGTCTGT;TCAGCTCCAAGCCTATCGAA;TATGAAAGGAACGTCTATTG;GGGTCGATATCTCCAGCATG	-1.5;-1.38;-0.5;-0.3
Amd-ps3	-1.33949	TTCATGAAGCCTTCTCACCA;ATCCCATTCAGATCTTGGGA;TCTTCCTGGAAATTCCGGTG;AAGCTTGCTAGGGATTACAG;CAGTGCTTTCAGTAAGAGGG;CTGCTGGTACTTGTATACTT	-1.79;-1.67;-1.64;-1.44;-1.42;-0.08
Ntpcr	-0.219046	ACACTCACGTTTCTTAGGAC;CAGTACCCAACTCTGGACAG;TGATACACACTCTGTGTTTG;GAAAGCCCGAGTGTCGAGTG	-0.61;-0.31;-0.02;0.07
Amd-ps1	-0.756637	AAGCTTGCTAGGGATTACAG;CTGCTGGTACTTGTATACTT	-1.44;-0.08
Amd-ps7	-0.0752326	CTGCTGGTACTTGTATACTT	-0.08
Amd-ps4	-1.33949	TTCATGAAGCCTTCTCACCA;ATCCCATTCAGATCTTGGGA;TCTTCCTGGAAATTCCGGTG;AAGCTTGCTAGGGATTACAG;CAGTGCTTTCAGTAAGAGGG;CTGCTGGTACTTGTATACTT	-1.79;-1.67;-1.64;-1.44;-1.42;-0.08
Rftn2	0.312799	CAGTTACCTAAATCTTTGGA;TTGTAAAGTAAAGTCCAGCA;TGCAAAGGAACTCATGGACA;TCCAGCAAGTCACCTGTACA	-0.23;-0.02;0.53;0.97
Rftn1	0.0617495	TCACGACGAAGGCTACACCC;GGATGTGAAATGCACCTTAG;AGGCTGGCGAGTTTCCACTG;CCACGAGGTTAGCCTCTCTG	-0.13;-0.07;0.12;0.33
1810046K07Rik	0.456102	GAAGTCGGAATCGGACAGGA;CGAAATGAGTTGGGTCACTG;CAGAGTCGAGGTGCTGAACA;GGTGGGCGGTAGTCTCCATA	-0.04;0.29;0.29;1.28
[truncated: 20,663 more rows]
